# Supplementary material
Source: Research Square preprint supplement (doi:10.21203/rs.3.rs-8701993/v1)
Supplement: Supplementary file 1 [file 5bce0639f04c6e65dcb61435.xlsx]

## Sheet: Аркуш1
Supplementary Table S1: Primer sequences used for mRNAs detection.
Name	5'-3' Sequence For	5'-3' Sequence Rev
GAPDH	AGTCCCTGCCACACTCAG	TACTTTATTGATGGTACATGACAAGG
RPL13A	GTTGATGCCTTCACAGCGTA	AGATGGCGGAGGTGCAG
MX1	GGCATAACCAGAGTGGCTGT	CATTACTGGGGACCACCACC
AIM2	AGACCCGGTTTGCTGATCG	CCAGGCCTGTTAGCAAGAGTA
KLF4	ATCTTTCTCCACGTTCGCGT	CTCCCGCCAGCGGTTATTC
ACOD1	CTGGTTCACTCCTCCTGAACT	GATCTGTCAGGTGTCCCACT
TIFAB	GTGCCCCGGCAATAAGGACT	TGGGATGGTACAGGCTCACT
HMOX1	GTGCCACCAAGTTCAAGCAG	GCAACTCCTCAAAGAGCTGGA
CLEC5A	CCCTGCAGCTCCTTCATCAT	CCTGGTGGTGGTGAAACCAT
MRC1	GCCTCGTTGTTTTGCGTCTT	GAGAACAGCACCCGGAATGA
MMP12	TCAGTCCCTGTATGGAGACCC	CCCACGGTAGTGACAGCATC
CD1B	GGACATCCTGCCCAATGCTAA	TGGAGGTGGGGTTTCTCCAGTA
PDZK1IP1	GGCCAGTTTCAGGTCCAGTG	TGGACATCCATCCCATGTGC
IL1B	GCTCGCCAGTGAAATGATGG	GGTGGTCGGAGATTCGTAGC
CXCL10	TCTGAGCCTACAGCAGAGGA	TGATGCAGGTACAGCGTACAG
CCL22	GCCTACTCTGATGACCGTGG	GAGAGTTGGCACAGGCTTCT
CCL17	AGGGTGTCTCCCTGAGCAGA	ACATTGGTCCCTCGAGCTGC
CXCL8	AGCTCTGTGTGAAGGTGCAGT	TTTCTGTGTTGGCGCAGTGT
CSF3	CATGAGAGGCAGTCCGAGGG	GAGGCTCTTGATGGCTCCGC
IL10	TGCCCCAAGCTGAGAACCAA	GGAAGAAATCGATGACAGCGCC
TNFAIP2	AGGACCCCAGTGCCATCAAG	GCTCAGGTGGCCTTTGCTGA
HLA-DQB1	AGCCACCAGGTCATCTCCTT	AGAATAGAAACAGAAACCCCTTGG
IL6	GACCCAACCACAAATGCCAG	GTGCCCATGCTACATTTGCC
CXCL8	AGCTCTGTGTGAAGGTGCAGT	TTTCTGTGTTGGCGCAGTGT
CCL5	TCTGCCTCCCCATATTCCTCG	CTGCTGGGTTGGAGCACTTG
IFNG	CCAGAGCATCCAAAAGAGTGTGG	TGGACATTCAAGTCAGTTACCGAA
CD160	TGTGGCCCTTCAAGCTTTGT	TAGCATCTCTTCCCCTGTGC
CD70	GGGCTGCTTTGGTCCCATTG	AGCTACGTCCCACCCAAGTG
CXCR2	CCAGCGACCCAGTCAGGAT	AAGGGGGCAGGGTAGAGCTG
CCL24	AGCTGGTGCTTCTGCTCTCT	GGATGACCACAGAGCCCGT
PTGS2	TTGCATTCTTTGCCCAGCAC	TGAAAAGGCGCAGTTTACGC
