# Supplementary material
Source: Research Square preprint supplement (doi:10.21203/rs.3.rs-8701993/v1)
Supplement: Supplementary file 2 [file 2bd43a37b26860ff4d33f4ba.pdf]

## Population doubling time (PDT) of the human umbilical cord-derived mesenchymal cells (hUC-MSC)

The proliferation rate and PDT of the isolated hUC-MSC at passage 2 were evaluated by counting cells every 24 hours. The PDT of UC-MSCs was  $27,16 \pm 3,67$  h (Fig. 1).

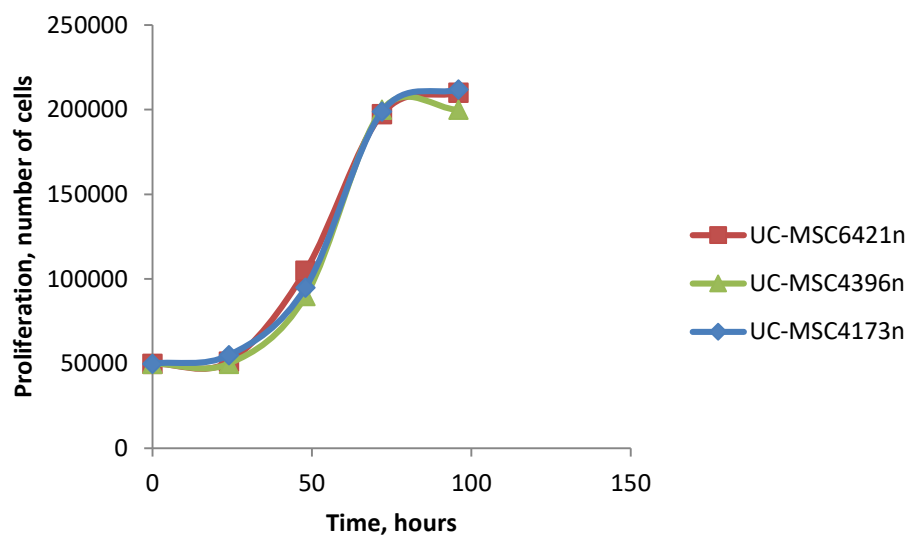

**Figure 1.** Proliferation rate and PDT of hUC-MSC at passage 2.

## Umbilical cord-derived mesenchymal stem cells express mesenchymal cell surface markers

The expressions of mesenchymal cell surface markers were assessed in the isolated UC-MSCs by flow cytometry. Cells stained with antibodies labeled with fluorescent dyes against CD34, CD45, CD73, CD90, and CD105. Flow cytometry demonstrated that stem cells were positive for CD73 ( $98,4 \pm 2,2\%$ ), CD90 ( $99,67 \pm 0,3\%$ ), CD105 ( $98,7 \pm 1,1\%$ ) and negative for CD34 and CD45 (Fig. 2).

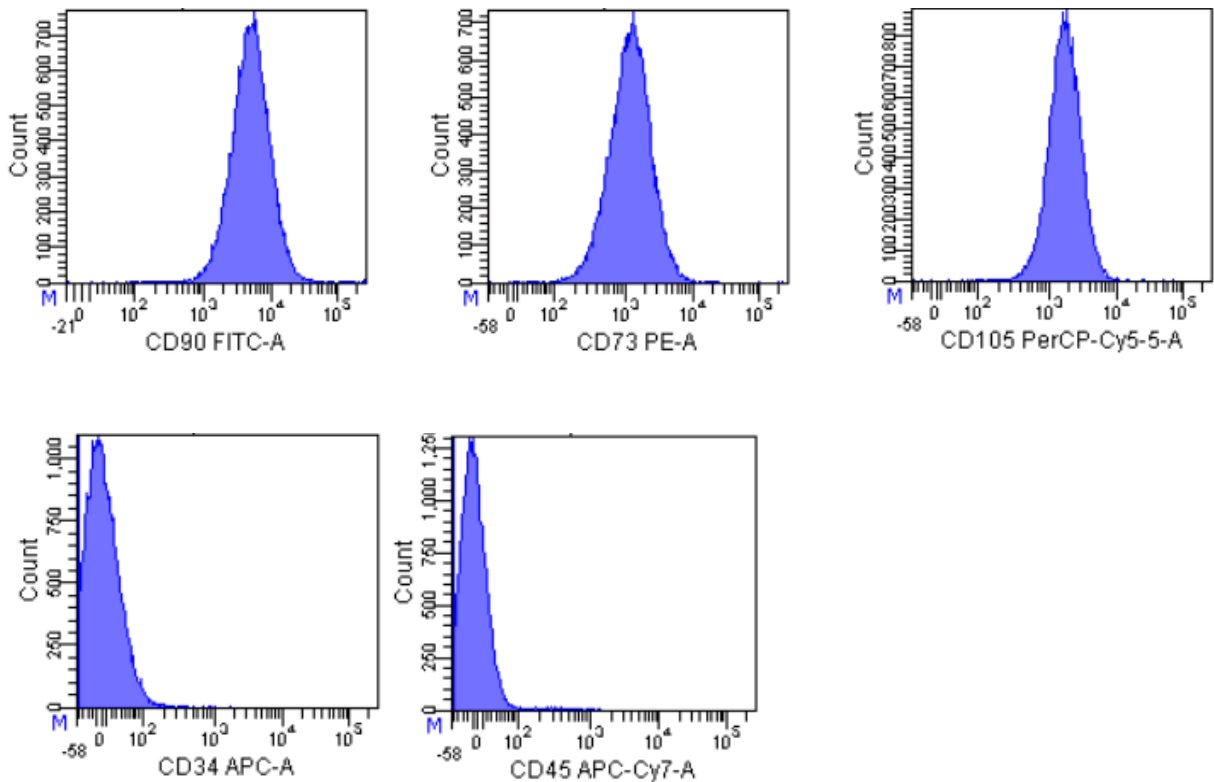

**Figure 2.** Expression of surface marker of the isolated hUC-MSCs. Flow cytometry analysis showed positive expression of mesenchymal stem cell markers (CD90, CD105, CD73) and negative expression of hematopoietic markers (CD34 and CD45) in hUC-MSCs at passage 2.

**Human umbilical cord-derived mesenchymal stem cells maintained a normal karyotype without any numerical or structural abnormalities**

The chromosomal stability of the isolated hUC-MSCs was evaluated by conventional cytogenetic analysis at passage 2. At this passage, the cells were generally characterized by a normal diploid karyotypes, with a typical chromosomal complement of 23 pairs of chromosomes. No evidence of any

numerical or structural chromosomal abnormalities was observed in the hUC-MSCs.

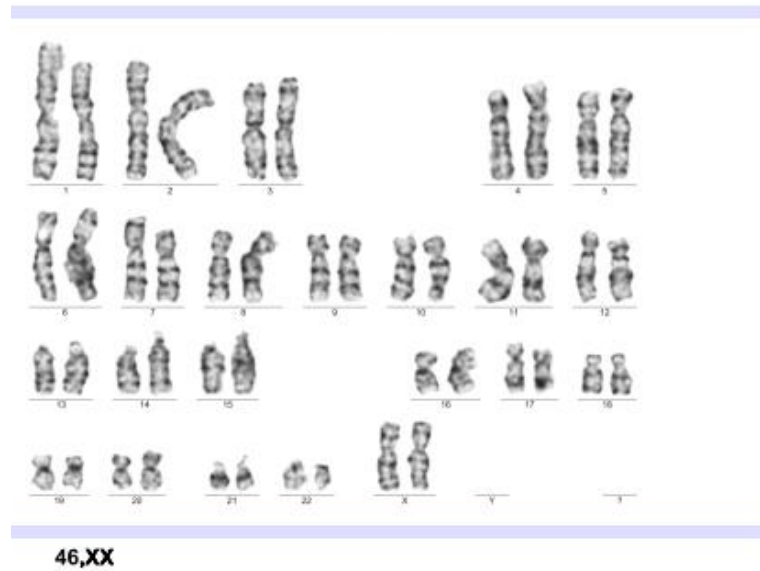

**Figure 3.** Metaphase spreads of cultured hUC-MSCs at passage 2. Photomicrograph of the metaphase spread viewed at the 100x magnification showing a typical chromosomal complement of 23 pairs of chromosomes, each with the classic appearance of four arms attached at the centromere.
