# Supplementary material
Source: Research Square preprint supplement (doi:10.21203/rs.3.rs-8701993/v1)
Supplement: Supplementary file 2 [file fcbc6701af2050104bd4c2bc.xlsx]

## Sheet: MSCvsCNTR_D1
gene_id	MSCA2F	MSCB2F	MSCC2P	MSCD2P	MSCE2F	MSCF2F	MSCG2F	MSCH2F	CNTRP2P	CNTRO2P	CNTRI2F	CNTRK2P	CNTRL2P	CNTRM2P	CNTRN2F	MSC_D1	CNTR_D1	log2FoldChange	pvalue	padj	gene_name	gene_chr	gene_start	gene_end	gene_strand	gene_length	gene_biotype	gene_description
ENSG00000163209	0	0	0	0	0	0	0	0	0	0	0	0	0	270.835786942502	928.677887032474	0	171.359096282139	-24.5538	1.75721627071415e-16	4.18e-12	SPRR3	1	153001747	153003856	+	1441	protein_coding	small proline rich protein 3 [Source:HGNC Symbol;Acc:HGNC:11268]
ENSG00000167759	0	0	0	0	0	0	0	0	0	0	0	0	0	102.222067445225	290.965636683876	0	56.1696720184429	-22.9925	1.23663660863753e-14	1.47e-10	KLK13	19	51056206	51065114	-	2007	protein_coding	kallikrein related peptidase 13 [Source:HGNC Symbol;Acc:HGNC:6361]
ENSG00000105507	0	0	0	0	0	0	0	0	119.116211063296	0	0	0	0	0	18.0911276694638	0	19.6010483903943	-20.6684	4.24687375054911e-12	3.37e-08	CABP5	19	48029953	48044053	-	1501	protein_coding	calcium binding protein 5 [Source:HGNC Symbol;Acc:HGNC:13714]
ENSG00000128045	28.0478470735451	66.766924407744	25.1115067251173	44.1935533997858	110.304156992692	42.5162435907507	48.3322249502669	12.5105382585609	8.82342304172563	10.3885702284278	10.0841870829298	9.74761559758688	7.89860570090952	2.10767149371597	3.01518794491063	47.2228744248079	7.43789444145803	2.63371	2.38595569655639e-08	0.000141994	RASL11B	4	52862290	52866835	+	2472	protein_coding	RAS like family 11 member B [Source:HGNC Symbol;Acc:HGNC:23804]
ENSG00000179344	340.193241924289	442.127316504939	130.987048593179	500.15878688964	253.534928013054	181.579790335498	182.017102472282	450.379377308192	1466.4529095348	355.808530323651	1754.64855242979	1321.24498690928	1270.68819213382	1532.27717593151	691.985633356989	310.122199005134	1199.01514008855	-1.95107	5.61093503512627e-08	0.000267137	HLA-DQB1	6	32659467	32668383	-	4904	protein_coding	major histocompatibility complex, class II, DQ beta 1 [Source:HGNC Symbol;Acc:HGNC:4944]
ENSG00000172752	39.8098474592253	16.2846157092059	14.9311661608805	23.8504891363924	13.1706456110677	130.205995996674	84.3243073600401	22.2409569041082	0	8.65714185702315	2.01683741658596	2.65844061752369	0	4.21534298743194	0	43.1022530421993	2.50682326836639	4.0652	1.00937400297308e-07	0.000400469	COL6A5	3	130345516	130484844	+	9586	protein_coding	collagen type VI alpha 5 chain [Source:HGNC Symbol;Acc:HGNC:26674]
ENSG00000134115	5.42861556262163	43.9684624148558	97.7312694166727	173.968273700744	57.6215745484214	130.205995996674	32.9070467746498	0	0	0.865714185702315	6.05051224975789	2.65844061752369	3.94930285045476	0	6.03037588982126	67.72890480183	2.7934779704657	4.63634	1.56097403893681e-07	0.000530843	CNTN6	3	1092576	1404217	+	5589	protein_coding	contactin 6 [Source:HGNC Symbol;Acc:HGNC:2176]
ENSG00000172236	215.335083983991	179.945003586725	821.892828219379	907.02007215751	566.337761275913	1431.38020088861	697.218053537893	435.088719436618	14.117476866761	305.597107552917	108.909220495642	15.0644968326343	44.429657067616	48.4764443554673	33.1670673940169	656.777215385829	81.3944957950078	3.01059	3.50209666637917e-07	0.00104209	TPSAB1	16	1240696	1242554	+	1512	protein_coding	tryptase alpha/beta 1 [Source:HGNC Symbol;Acc:HGNC:12019]
ENSG00000004799	265.097393308023	274.395774700119	183.246130156261	285.504384662109	237.071620999219	176.265259886654	325.985432111375	496.251350922915	112.939814934088	99.5571313557662	194.624810700546	60.257987330537	84.9100112847773	56.9071303303312	93.4708262922295	280.477168343334	100.381101746896	1.48066	4.67339870233394e-07	0.00117162	PDK4	7	95583499	95596491	-	4519	protein_coding	pyruvate dehydrogenase kinase 4 [Source:HGNC Symbol;Acc:HGNC:8812]
ENSG00000180229	37.0955396779144	19.541538851047	43.4361197407434	25.2534590855919	59.2679052498049	38.9732232915215	8.22676169366245	45.8719736147233	199.409360742999	141.97712645518	174.456436534686	31.0151405377764	220.173633912853	67.445487798911	324.132704077893	34.7083151506261	165.515698580043	-2.26008	4.92174620948082e-07	0.00117162	HERC2P3	15	20379495	20506180	-	9413	transcribed_unprocessed_pseudogene	hect domain and RLD 2 pseudogene 3 [Source:HGNC Symbol;Acc:HGNC:4871]
ENSG00000224389	100.4293879085	45.5969239857764	53.6164603049801	59.6262228409809	105.365164888542	204.609422280488	82.2676169366245	116.765023746568	24.7055845168318	24.2399971996648	20.1683741658596	12.4060562151106	28.632445665797	41.0995941274614	42.2126312287488	96.0345278615575	27.6378118742106	1.80504	6.07605496421149e-07	0.00131491	C4B	6	32014795	32035418	+	7174	protein_coding	complement C4B (Chido blood group) [Source:HGNC Symbol;Acc:HGNC:1324]
ENSG00000109339	76.0006178767028	96.8934634697749	91.6230650781306	132.580660199358	82.3165350691734	60.2313450868968	69.9274743961308	58.3825118732841	18.5291883876238	28.5685681281764	51.4293541229421	14.1783499601264	31.5944228036381	13.6998647091538	45.2278191736594	83.4944591311814	29.0325096121886	1.54075	1.60383016617932e-06	0.0031816	MAPK10	4	85990007	86594625	-	42646	protein_coding	mitogen-activated protein kinase 10 [Source:HGNC Symbol;Acc:HGNC:6872]
ENSG00000236675	60.6195404492748	46.4111547712367	61.0820433854204	39.2831585775874	204.14500697155	32.7729377678703	23.6519398692795	79.2334089708856	64.4109882045971	1076.94844701368	66.5556347473368	116.085240298535	756.291495862086	475.279921832951	661.833753907883	68.3998988453881	459.629354552438	-2.75503	2.77788234632259e-06	0.00508673	MTX1P1	1	155230975	155234325	+	838	unprocessed_pseudogene	metaxin 1 pseudogene 1 [Source:HGNC Symbol;Acc:HGNC:7505]
ENSG00000149534	1.80953852087388	15.4703849237456	4.75082559664381	24.5519741109921	13.1706456110677	19.4866116457607	22.6235946575717	22.2409569041082	3.52936921669025	0	0	0	1.97465142522738	0	0	15.5130664963455	0.78628866313109	4.22163	3.01310684158954e-06	0.00512336	MS4A2	11	60088261	60098466	+	4453	protein_coding	membrane spanning 4-domains A2 [Source:HGNC Symbol;Acc:HGNC:7316]
ENSG00000197253	24.4287700317973	14.6561541382853	588.423684612883	643.261721707994	520.240501637176	814.894668822722	794.910848650134	118.155083553075	1.76468460834513	94.3628462415523	27.2273051239105	32.7874342827922	81.9480341469362	51.6379515960412	24.121503559285	439.871429144258	44.8356799369804	3.29326	4.42141226586784e-06	0.00701678	TPSB2	16	1227272	1230184	-	1738	protein_coding	tryptase beta 2 (gene/pseudogene) [Source:HGNC Symbol;Acc:HGNC:14120]
ENSG00000163751	76.0006178767028	27.68384670565	58.367285901624	181.684608421342	146.523432423129	212.581217953753	148.081710485924	209.899030782522	8.82342304172563	64.9285639276736	47.3956792897702	7.08917498006318	20.7338399648875	12.6460289622958	6.03037588982126	132.602718818831	23.9495837223196	2.46054	5.81503638475001e-06	0.00865168	CPA3	3	148865256	148897196	+	1848	protein_coding	carboxypeptidase A3 [Source:HGNC Symbol;Acc:HGNC:2298]
ENSG00000261606	5.42861556262163	0	0	0	0	0	0	0	1.76468460834513	83.1085618274222	4.03367483317193	57.5995467130134	20.7338399648875	8.43068597486388	15.0759397245531	0.678576945327703	27.2495619494653	-5.27845	7.99910342852805e-06	0.0109537	AC091230.1	15	74816223	74831795	+	6793	processed_transcript	novel transcript
ENSG00000182107	176.430005785203	349.305006962466	226.003560526056	247.624196033721	102.072503485775	233.839339749129	210.8107684001	535.173025505105	75.8814381588405	73.5857057846968	154.288062368826	86.842393505774	110.580479812733	81.1453525080648	120.607517796425	260.157300805944	100.418707133623	1.37519	8.28260325741167e-06	0.0109537	TMEM30B	14	61277370	61281840	-	4471	protein_coding	transmembrane protein 30B [Source:HGNC Symbol;Acc:HGNC:27254]
ENSG00000282508	27.1430778131081	20.3557696365073	21.0393704994226	24.5519741109921	24.694960520752	14.1720811969169	38.0487728331888	23.631016710615	180.880172355375	219.891403168388	31.2609799570824	203.813780676816	45.4169827802297	56.9071303303312	15.0759397245531	24.2046279151879	107.606626998968	-2.15793	1.35844736616548e-05	0.0162709	LINC01002	19	198264	239440	-	7765	processed_transcript	long intergenic non-protein coding RNA 1002 [Source:HGNC Symbol;Acc:HGNC:38538]
ENSG00000130589	1425.91635444861	978.705404123273	1043.82425251974	1204.44970138781	1252.85766375282	835.26703554329	1482.87379528266	1138.45898152904	2730.84943141408	2166.01689262719	1200.01826286865	2207.39185941717	2354.77182458365	1774.65939770885	1902.58359323861	1170.29414857341	2048.04160883689	-0.807817	1.43711660017691e-05	0.0162709	HELZ2	20	63558086	63574239	-	12066	protein_coding	helicase with zinc finger 2 [Source:HGNC Symbol;Acc:HGNC:30021]
ENSG00000102794	0	0	0	10.5222746189966	0	0	0	5.56023922602706	3.52936921669025	93.49713205585	49.4125167063561	25.698259302729	37.5183770793202	60.0686375709051	27.1366915041957	2.01031423062796	42.4087119194352	-4.37581	1.44505270845589e-05	0.0162709	ACOD1	13	76948497	76958642	+	2177	protein_coding	aconitate decarboxylase 1 [Source:HGNC Symbol;Acc:HGNC:33904]
ENSG00000099994	4582.65630411309	1317.42541087475	1874.54004256146	1653.40008513167	1473.4659777382	5124.09310776027	3100.46081329904	5436.52390324796	45.8817998169733	1463.05697383691	957.997772878333	414.716736333696	938.946752695619	452.095535402075	505.04398077253	3070.3207055908	682.534221676591	2.16929	1.50371761362722e-05	0.0162709	SUSD2	22	24181259	24189110	+	5279	protein_coding	sushi domain containing 2 [Source:HGNC Symbol;Acc:HGNC:30667]
ENSG00000135312	73.2863100953919	13.0276925673647	64.475490240166	37.8801886283879	52.682582444271	22.1438768701827	30.8503563512342	212.679150395535	0	7.79142767132083	17.1431180409807	7.08917498006318	22.7084913901149	6.32301448114791	6.03037588982126	63.3782059490667	9.58365749334982	2.71985	2.04457914152354e-05	0.0211614	HTR1B	6	77461753	77463773	-	2021	protein_coding	5-hydroxytryptamine receptor 1B [Source:HGNC Symbol;Acc:HGNC:5287]
ENSG00000159184	0	0	103.160784384266	61.7306777647802	52.682582444271	7.08604059845845	20.5669042341561	0	0	0	0	0	1.97465142522738	0	0	30.6533736782414	0.282093060746768	6.54331	2.42361059826864e-05	0.0240392	HOXB13	17	48724763	48729178	-	3467	protein_coding	homeobox B13 [Source:HGNC Symbol;Acc:HGNC:5112]
ENSG00000122035	179.144313566514	395.716161733703	391.60376703764	345.832092477689	248.595935908904	503.10888249055	244.746160386458	440.648958662645	44.1171152086282	174.008551326165	265.214120281054	101.0207434659	105.643851249665	99.0605602046506	137.191051493434	343.674534033013	132.322284747071	1.37804	2.94428388862203e-05	0.0280355	RASL11A	13	27270327	27273690	+	1624	protein_coding	RAS like family 11 member A [Source:HGNC Symbol;Acc:HGNC:23802]
ENSG00000205639	1.80953852087388	5.69961549822205	0	2.8059398983991	3.29266140276694	11.514815972495	3.08503563512342	0	81.1754919838758	15.5828553426417	9.07576837463684	9.74761559758688	18.7591885396601	10.5383574685798	70.8569167053998	3.52595086598505	30.819456287483	-3.10953	3.5538055269679e-05	0.0325378	MFSD2B	2	24010081	24063321	+	4438	protein_coding	major facilitator superfamily domain containing 2B [Source:HGNC Symbol;Acc:HGNC:37207]
ENSG00000185215	3820.84058682519	4308.09508587041	2760.908361021	4070.0158226279	3989.05928945214	3648.42515313129	4884.63975561208	2698.10608442963	15749.8101294803	8508.23901708235	5975.88926534421	6627.49245948657	4865.54111176026	6899.46263467923	5376.08010577565	3772.51126737121	7714.6449605155	-1.03213	3.70713134503863e-05	0.0326845	TNFAIP2	14	103123442	103137439	+	5029	protein_coding	TNF alpha induced protein 2 [Source:HGNC Symbol;Acc:HGNC:11895]
ENSG00000197361	41.6193859800991	61.8815396949823	37.3279154022014	56.8202829425818	21.4022991179851	108.947874201299	83.2959621483323	84.7936481969127	14.117476866761	19.0457120854509	20.1683741658596	29.2428467927606	26.6577942405696	25.2920579245916	31.6594734215616	62.0111134605492	23.7405336425079	1.39563	4.05127300047461e-05	0.0344431	FBXL22	15	63597353	63602428	+	3614	protein_coding	F-box and leucine rich repeat protein 22 [Source:HGNC Symbol;Acc:HGNC:27537]
ENSG00000154917	329.336010799045	249.15462035085	394.318524521436	378.100401309279	345.729447290528	315.328806631401	342.438955498699	411.457702726003	95.2929688506369	144.574269012287	323.702405362047	147.100380836311	202.401771085806	155.967690534982	195.987216419191	345.733058640905	180.71810030018	0.937264	4.53821877437831e-05	0.0372525	RAB6B	3	133824239	133895836	-	6005	protein_coding	RAB6B, member RAS oncogene family [Source:HGNC Symbol;Acc:HGNC:14902]
ENSG00000163568	93.1912338250046	56.1819241967602	264.688854670155	171.863818776945	149.816093825896	52.2595494136311	105.919556805904	159.856877748278	138.527741755092	377.451384966209	204.708997783475	487.380779879344	635.837758923216	442.611013680354	373.883305168918	131.722238657822	380.05728316523	-1.52838	5.41845659775128e-05	0.0429955	AIM2	1	159062484	159147096	-	2009	protein_coding	absent in melanoma 2 [Source:HGNC Symbol;Acc:HGNC:357]
ENSG00000283633	10.8572311252433	16.2846157092059	4.75082559664381	20.3430642633935	3.29266140276694	10.6290608976877	8.22676169366245	54.2123324537638	629.110062875038	19.0457120854509	13.1094432078088	46.0796373704107	28.632445665797	61.1224733177631	105.531578071872	16.0745691427959	128.947336084877	-3.01124	5.89931523484642e-05	0.0445326	AP000547.3	22	16601911	16615111	+	3071	lincRNA	novel transcript
ENSG00000138735	759.101409506591	1216.46079347768	1172.77523300007	1268.28483407639	694.751555983824	1740.50872199636	1055.08218721221	1064.78581178418	677.638889604529	282.222824538955	989.258752835416	307.492964760241	399.866913608544	463.687728617513	444.740221874318	1121.46881837966	509.272613691359	1.13931	5.98631656270262e-05	0.0445326	PDE5A	4	119494395	119628991	-	9775	protein_coding	phosphodiesterase 5A [Source:HGNC Symbol;Acc:HGNC:8784]
ENSG00000157470	57.905232667964	89.5653864006323	125.557533625586	112.939080910564	75.7312122636395	71.7461610593918	81.2392717249167	104.254485488007	16.7645037792787	13.851426971237	63.5303786224579	61.1441342030449	35.5437256540928	32.6689081525975	19.5987216419191	89.8672955175877	34.7288284320897	1.36955	6.55029064501566e-05	0.0451778	FAM81A	15	59372693	59523549	+	5578	protein_coding	family with sequence similarity 81 member A [Source:HGNC Symbol;Acc:HGNC:28379]
ENSG00000211653	140.239235367725	71.6523091205058	17.645923644677	30656.2963599594	6549.10353010344	150.578362717242	512.115915430487	47.26203342123	336.172417889747	10.3885702284278	89.7492650380754	8.86146872507898	6.91127998829583	31.6150724057395	0	4768.11170872059	69.0997248964806	4.75068	6.70746429369425e-05	0.0451778	IGLV1-40	22	22409766	22410282	+	407	IG_V_gene	immunoglobulin lambda variable 1-40 [Source:HGNC Symbol;Acc:HGNC:5877]
ENSG00000180573	333.85985710123	166.91731101936	522.590815630819	383.712281106077	546.581792859311	142.606567043976	227.264291787425	380.876386982854	9883.11614903688	866.579899888017	210.759510033233	1339.85407123194	431.461336412182	310.881545323105	990.489239903142	338.051162941382	2004.7345359755	-2.56846	7.1938328382037e-05	0.0451778	HIST1H2AC	6	26124145	26139116	+	1668	protein_coding	histone cluster 1 H2A family member c [Source:HGNC Symbol;Acc:HGNC:4733]
ENSG00000277617	6.33338482305856	14.6561541382853	1.35737874189823	3.50742487299888	19.7559684166016	0.885755074807306	9.25510690537025	2.78011961301353	0	0	1.00841870829298	0	0	1.05383574685798	0	7.31641157325421	0.294607779307281	4.45229	7.28563276378788e-05	0.0451778	RF00017	1	32269338	32269597	-	260	misc_RNA	-
ENSG00000069482	108.572311252433	813.416554674833	540.915428646445	453.159293591455	207.437668374317	20.372366720568	830.902931059907	63.9427510993112	0	58.0028504420551	85.7155902049035	99.2484497208846	55.2902399063666	28.4535651651656	10.5531578071872	379.839913177409	48.1805504637946	2.97741	7.32199673280149e-05	0.0451778	GAL	11	68683779	68691175	+	1300	protein_coding	galanin and GMAP prepropeptide [Source:HGNC Symbol;Acc:HGNC:4114]
ENSG00000206384	14.476308166991	83.0515401169499	8.14427245138939	85.5811669011726	49.389921041504	134.634771370711	77.1258908780855	9.73041864554736	0	0	4.03367483317193	0	1.97465142522738	0	24.121503559285	57.7667861965438	4.30426140252633	3.82074	7.38544576598578e-05	0.0451778	COL6A6	3	130560334	130678155	+	9720	protein_coding	collagen type VI alpha 6 chain [Source:HGNC Symbol;Acc:HGNC:27023]
ENSG00000211890	513.004170667744	176.688080444884	984.099587876218	1393.85064452975	1527.79489088386	820.209199271565	881.29184643359	450.379377308192	7297.85319781127	323.777105452666	179.498530076151	56.7133998405055	28.632445665797	66.391652052053	209.555562171289	843.414724676976	1166.06027043853	2.1087	7.40152907603767e-05	0.0451778	IGHA2	14	105583731	105588395	-	1430	IG_C_gene	immunoglobulin heavy constant alpha 2 (A2m marker) [Source:HGNC Symbol;Acc:HGNC:5479]
ENSG00000157601	728.339254651735	638.35693580087	306.088906298051	479.815722626246	1328.58887601646	340.129948726006	1038.62866382488	369.7559085308	1664.97992797363	2114.07404148505	949.930423211989	1264.53158706877	3963.12541043135	857.822297942399	2359.38456689257	653.713027059381	1881.97832214368	-1.52631	7.64949749218445e-05	0.0455241	MX1	21	41420304	41459214	+	8616	protein_coding	MX dynamin like GTPase 1 [Source:HGNC Symbol;Acc:HGNC:7532]
ENSG00000082458	456.908476520653	340.348468322403	503.587513244244	493.845422118242	495.545541116424	513.737943388238	533.711164876351	450.379377308192	367.936740839959	271.834254310527	321.685567945461	396.993798883538	301.134342347175	328.796753019691	233.677065730574	473.507988361843	317.436931868132	0.574042	7.87566235746277e-05	0.0457269	DLG3	X	70444861	70505490	+	7844	protein_coding	discs large MAGUK scaffold protein 3 [Source:HGNC Symbol;Acc:HGNC:2902]
ENSG00000271503	628.814636003672	401.415777231925	836.145305009311	1580.44564777329	964.749791010712	392.389498139637	660.197625916412	752.02235532016	14405.1204579213	1604.16838610639	1241.36342990866	381.929302050904	1341.775643442	4867.66731473703	1760.86975982781	777.02257955064	3657.55632771344	-2.23488	8.50175498613567e-05	0.0471532	CCL5	17	35871491	35880793	-	1512	protein_coding	C-C motif chemokine ligand 5 [Source:HGNC Symbol;Acc:HGNC:10632]
ENSG00000067715	18.0953852087388	17.9130772801265	14.9311661608805	16.8356393903946	36.2192754304363	23.9153870197973	18.5102138107405	8.34035883904059	3.52936921669025	4.32857092851157	8.06734966634386	7.08917498006318	11.8479085513643	2.10767149371597	3.01518794491063	19.3450628925194	5.71217611165711	1.7297	8.5174896776084e-05	0.0471532	SYT1	12	78863993	79452008	+	6494	protein_coding	synaptotagmin 1 [Source:HGNC Symbol;Acc:HGNC:11509]
ENSG00000205572	29.8573855944189	19.541538851047	30.5410216927102	17.5371243649944	52.682582444271	16.8293464213388	22.6235946575717	29.1912559366421	178.233145442858	161.022838540631	84.7071714966105	27.4705530477448	75.0367541586404	23.1843864308757	66.3341347880338	27.3504812453743	87.9984262721991	-1.70226	8.96343099716416e-05	0.0474485	SERF1B	5	70025247	70043113	+	3051	protein_coding	small EDRK-rich factor 1B [Source:HGNC Symbol;Acc:HGNC:10756]
ENSG00000136826	239.763854015788	146.561541382853	471.689112809635	411.070195115468	454.387273581837	178.922525111076	192.30055458936	170.977356200332	4164.6556756945	203.442833640044	3642.40837435425	203.813780676816	440.347267825706	433.126491958632	889.480443748636	283.209051600794	1425.32498112837	-2.33143	8.96946501580814e-05	0.0474485	KLF4	9	107484852	107490482	-	3659	protein_coding	Kruppel like factor 4 [Source:HGNC Symbol;Acc:HGNC:6348]
ENSG00000268218	16.2858466878649	17.9130772801265	14.9311661608805	4.91039482219843	9.87798420830081	7.08604059845845	6.17007127024684	25.0210765171218	156.174587838544	32.897139056688	49.4125167063561	21.2675249401895	20.7338399648875	50.5841158491833	21.1063156143744	12.7744571931498	50.3108628528889	-1.98953	0.000109024497911293	0.0564202	AC137932.3	16	89268104	89273044	+	3660	antisense	novel transcript, antisense to ANKRD11
ENSG00000234832	0	0	0.678689370949116	0	0	0	0	0	14.9998191709336	1.73142837140463	3.02525612487895	2.65844061752369	1.97465142522738	2.10767149371597	10.5531578071872	0.0848361713686395	5.29291785869591	-4.53346	0.000118897745332208	0.0588026	AL096677.1	20	23346941	23351486	-	814	antisense	novel transcript
ENSG00000259275	7.2381540834955	47.225385556697	20.3606811284735	56.8202829425818	46.0972596387371	43.401998665558	76.0975456663777	26.4111363236285	0	6.92571348561852	18.1515367492737	12.4060562151106	10.8605828387506	2.10767149371597	10.5531578071872	40.4565555006936	8.71495979852236	2.22041	0.000123132106290133	0.0588026	AC087477.2	15	96354237	96403803	+	5303	lincRNA	novel transcript
ENSG00000133106	618.862174138865	402.230008017385	616.249948821797	606.083018054206	879.140594538772	582.826839223207	683.849565785691	611.626314862977	838.225188963935	1175.63986418374	643.371135890923	1138.69873117265	1947.99363098681	985.336423312216	1290.50044042175	625.108557930363	1145.68077356172	-0.874943	0.000125156916501921	0.0588026	EPSTI1	13	42886388	42992271	-	4924	protein_coding	epithelial stromal interaction 1 [Source:HGNC Symbol;Acc:HGNC:16465]
ENSG00000111335	860.435566675528	902.981941075465	1217.56873148271	1028.37697276327	1228.16270323207	993.817193933798	976.927951122416	882.687977131796	2480.26421702908	1656.11123724853	1252.45603569988	1410.74582103257	3363.81870287484	1100.20451971974	1863.38614995477	1011.36987967713	1875.28381193706	-0.890932	0.000125223869254974	0.0588026	OAS2	12	112978395	113011723	+	6264	protein_coding	2'-5'-oligoadenylate synthetase 2 [Source:HGNC Symbol;Acc:HGNC:8087]
ENSG00000139155	14.476308166991	17.9130772801265	42.0787409988452	52.6113730949832	23.0486298193686	75.289181358621	45.2471893151435	38.9216745821894	0	5.19428511421389	25.2104677073246	9.74761559758688	9.8732571261369	5.26917873428992	7.53796986227657	38.6982718270335	8.97611059168982	2.11461	0.00012597906853132	0.0588026	SLCO1C1	12	20695355	20753386	+	4860	protein_coding	solute carrier organic anion transporter family member 1C1 [Source:HGNC Symbol;Acc:HGNC:13819]
ENSG00000150681	136.620158325978	66.766924407744	93.659133190978	159.237089234149	227.193636790919	77.9464465830429	109.004592441027	172.367416006839	4736.41348879832	225.085688282602	207.734253908354	145.328087091295	99.7198969739827	64.2839805583371	590.976837202483	130.349424622585	867.077461830768	-2.73505	0.000130839701164859	0.0598969	RGS18	1	192158457	192185815	+	2806	protein_coding	regulator of G protein signaling 18 [Source:HGNC Symbol;Acc:HGNC:14261]
ENSG00000273802	7.2381540834955	0	13.5737874189823	24.5519741109921	0	0	0	4.1701794195203	509.993851811742	24.2399971996648	28.2357238322035	59.3718404580292	18.7591885396601	8.43068597486388	48.2430071185701	6.19176187912378	99.6106135621047	-3.98376	0.000135340441081894	0.0607883	HIST1H2BG	6	26215159	26216692	-	1534	protein_coding	histone cluster 1 H2B family member g [Source:HGNC Symbol;Acc:HGNC:4746]
ENSG00000270231	419.812936842739	299.636929049388	209.036326252328	317.772693493698	251.888597311671	203.72366720568	269.426445467445	332.224293755117	732.344112463228	260.579969896397	446.729487773791	509.534451692041	531.181233386165	525.864037682134	676.909693632436	287.940236172258	526.163283789456	-0.869153	0.00014025865596769	0.0614489	NBPF8	1	120436353	120467739	+	5330	unprocessed_pseudogene	NBPF member 8 [Source:HGNC Symbol;Acc:HGNC:31990]
ENSG00000100916	322.09785671555	344.419622249704	398.390660747131	324.787543239696	251.888597311671	360.502315446574	288.965004489893	393.386925241415	112.057472629916	192.188549225914	294.458262821551	217.992130636943	204.376422511034	189.690434434437	220.108719978476	335.554815680204	204.410284605467	0.71784	0.000141973919342772	0.0614489	BRMS1L	14	35826318	35932325	+	3897	protein_coding	BRMS1 like transcriptional repressor [Source:HGNC Symbol;Acc:HGNC:20512]
ENSG00000184979	112.19138829418	56.1819241967602	141.167389157416	139.595509945355	108.657826291309	63.774365386126	46.2755345268513	100.084306068487	113.822157238261	179.202836440379	199.66690424201	155.075702688882	444.29657067616	204.444134890449	296.996012573697	95.9910304833107	227.64347410712	-1.24354	0.000144906460965105	0.0615982	USP18	22	18149899	18177397	+	2129	protein_coding	ubiquitin specific peptidase 18 [Source:HGNC Symbol;Acc:HGNC:12616]
ENSG00000008256	1685.58513219401	1371.16464271513	1166.66702866153	1348.25412118077	1236.39435673898	1474.78219955416	1293.65827632842	1661.12146877558	505.582140290879	614.657071848643	1262.54022278281	941.974125475895	961.655244085734	820.93804680237	898.526007583367	1404.70340326858	857.981836981386	0.711544	0.000156886305349948	0.0655207	CYTH3	7	6161776	6272644	-	5808	protein_coding	cytohesin 3 [Source:HGNC Symbol;Acc:HGNC:9504]
ENSG00000225523	3.61907704174775	0	139.810010415518	85.5811669011726	26.3412912221355	1.77151014961461	20.5669042341561	0	4.41171152086282	0	2.01683741658596	0	0	0	0	34.711244995543	0.918364133921255	5.20521	0.000168643000172216	0.0692163	IGKV6D-21	2	90021567	90022185	+	409	IG_V_gene	immunoglobulin kappa variable 6D-21 (non-functional) [Source:HGNC Symbol;Acc:HGNC:5837]
ENSG00000153395	2983.92902092102	2556.68466634532	2869.49866037286	3029.01212032183	2500.77633540149	2537.68828932293	2710.71797806178	2757.87865610942	5231.40752143913	5260.07939232726	3028.28138100383	6586.7297033512	3783.43213073566	4465.10205943728	2722.7147142543	2743.27321585708	4439.67812893552	-0.694688	0.000171658557865666	0.0692599	LPCAT1	5	1456480	1523977	-	6494	protein_coding	lysophosphatidylcholine acyltransferase 1 [Source:HGNC Symbol;Acc:HGNC:25718]
ENSG00000137501	2017.63545077437	1845.04695985302	1675.68405687337	2006.24702735536	1552.48985140461	3203.77610557803	2175.97846797372	2272.74778363856	782.637623801064	503.845656078747	1977.50908696254	544.094179719849	1022.86943826778	811.453525080648	1361.35735712715	2093.70071293138	1000.53812386254	1.06579	0.000178135940537468	0.0706754	SYTL2	11	85694224	85811159	-	11258	protein_coding	synaptotagmin like 2 [Source:HGNC Symbol;Acc:HGNC:15585]
ENSG00000279806	0	0	0	0	0	0	0	0	7.94108073755307	8.65714185702315	16.1346993326877	0	0	6.32301448114791	21.1063156143744	0	8.59460743182661	-5.59603	0.000185786548719791	0.0718586	AC018629.1	17	40473554	40475289	-	1736	TEC	TEC
ENSG00000108813	0	0	1.35737874189823	0	0	0	0	2.78011961301353	35.2936921669025	6.92571348561852	4.03367483317193	15.0644968326343	0	6.32301448114791	4.52278191736594	0.51718729436397	10.3090533881202	-4.46662	0.000187155325053423	0.0718586	DLX4	17	49968970	49974959	+	3644	protein_coding	distal-less homeobox 4 [Source:HGNC Symbol;Acc:HGNC:2917]
ENSG00000227155	0	4.88538471276176	1.35737874189823	0.701484974599775	0	0	6.17007127024684	8.34035883904059	169.409722401132	19.0457120854509	23.1936302907386	6.20302810755528	1.97465142522738	10.5383574685798	6.03037588982126	2.6818348173184	33.7707825240722	-3.68166	0.000199412429403559	0.0743063	AL161725.1	9	452492	492248	-	4016	antisense	novel transcript
ENSG00000267505	19.0001544691757	13.0276925673647	25.1115067251173	14.0296994919955	19.7559684166016	15.9435913465315	41.1338084683122	33.3614353561624	1.76468460834513	1.73142837140463	6.05051224975789	4.43073436253949	9.8732571261369	3.16150724057395	18.0911276694638	22.6704821051576	6.44332166117454	1.87433	0.000207728228889882	0.0743063	AC005180.2	17	44793199	44794474	+	562	lincRNA	novel transcript
ENSG00000187753	1.80953852087388	0	4.07213622569469	2.8059398983991	1.64633070138347	15.9435913465315	16.4535233873249	8.34035883904059	0	0	0	0	0	0	1.50759397245531	6.38392736490602	0.215370567493616	4.68964	0.000214072245404581	0.0743063	C9orf153	9	86220265	86259657	-	2928	protein_coding	chromosome 9 open reading frame 153 [Source:HGNC Symbol;Acc:HGNC:31456]
ENSG00000100906	6867.19868671636	5741.95549906599	4204.48065302977	5155.21307833375	5874.10794253621	2907.04815551758	3704.09945257152	3822.6644678936	14231.2990239993	9670.02745429486	7311.03563512412	9724.57577890167	4763.84656336105	12610.1985469026	6307.77318075304	4784.5959919581	9231.25088333381	-0.948184	0.000215987852548496	0.0743063	NFKBIA	14	35401511	35404749	-	2373	protein_coding	NFKB inhibitor alpha [Source:HGNC Symbol;Acc:HGNC:7797]
ENSG00000233614	2.71430778131081	4.88538471276176	6.10820433854204	7.71633472059753	0	3.54302029922922	11.3117973287859	1.39005980650677	307.937464156225	7.79142767132083	4.03367483317193	1.7722937450158	2.96197713784107	9.48452172172186	51.2581950634807	4.70863862346675	55.0342220469681	-3.52508	0.000217679290751276	0.0743063	DDX11L10	16	11555	14090	+	1723	transcribed_unprocessed_pseudogene	DEAD/H-box helicase 11 like 10 [Source:HGNC Symbol;Acc:HGNC:14125]
ENSG00000170382	1.80953852087388	0.814230785460293	2.71475748379646	7.01484974599775	16.4633070138347	8.85755074807306	10.2834521170781	6.95029903253383	194.115306917964	15.5828553426417	30.2525612487895	26.5844061752369	11.8479085513643	28.4535651651656	3.01518794491063	6.863498180956	44.2645416208675	-2.72543	0.000217990990184801	0.0743063	LRRN2	1	204617170	204685733	-	5681	protein_coding	leucine rich repeat neuronal 2 [Source:HGNC Symbol;Acc:HGNC:16914]
ENSG00000158258	18.0953852087388	16.2846157092059	64.475490240166	131.177690250158	55.9752438470379	58.4598349372822	39.0771180448966	2.78011961301353	0	13.851426971237	16.1346993326877	8.86146872507898	5.92395427568214	2.10767149371597	12.0607517796425	48.2906872313124	8.41999608257776	2.52897	0.000219672157732034	0.0743063	CLSTN2	3	139935185	140577397	+	14596	protein_coding	calsyntenin 2 [Source:HGNC Symbol;Acc:HGNC:17448]
ENSG00000141433	27.1430778131081	6.51384628368235	5.42951496759293	41.3876135013867	51.0362517428875	18.6008565709534	29.8220111395264	0	0	3.46285674280926	3.02525612487895	5.31688123504739	0.98732571261369	0	6.03037588982126	22.4916465023922	2.68895652931008	3.08704	0.000219805688902195	0.0743063	ADCYAP1	18	904943	912172	+	3805	protein_coding	adenylate cyclase activating polypeptide 1 [Source:HGNC Symbol;Acc:HGNC:241]
ENSG00000254851	168.28708244127	42.3400008439353	55.6525284178275	36.4772186791883	32.9266140276694	212.581217953753	117.23135413469	195.998432717454	11.4704499542433	32.897139056688	10.0841870829298	54.9411060954897	50.3536113432982	16.8613719497278	30.1518794491063	107.686806151974	29.5371064187833	1.86453	0.000221623545025377	0.0743063	AP005018.2	11	117135528	117138582	+	822	unprocessed_pseudogene	proprotein convertase subtilisin/kexin type 7 (PCSK7) pseudogene
ENSG00000174348	127.572465721608	113.992309964441	98.4099587876218	222.370736948129	166.27940083973	753.777568661018	396.941251719213	133.445741424649	22.0585576043141	27.7028539424741	115.968151453693	51.3965186054581	160.934091156031	54.7994588366152	54.2733830083913	251.598679258301	69.5904306581396	1.85491	0.000236003413051856	0.0772545	PODN	1	53062052	53085502	+	4900	protein_coding	podocan [Source:HGNC Symbol;Acc:HGNC:23174]
ENSG00000138193	199.954006556563	168.545772590281	84.1574819976904	122.759870554961	164.633070138347	233.839339749129	225.20760136401	95.9141266489668	71.4697266379776	58.8685646277574	70.5893095805088	105.45147782844	85.897336997391	83.2530240017808	111.561953961693	161.876408699993	83.8701990907927	0.952262	0.000239233662267521	0.0772545	PLCE1	10	94030812	94332823	+	12930	protein_coding	phospholipase C epsilon 1 [Source:HGNC Symbol;Acc:HGNC:17175]
ENSG00000111816	62.4290789701487	98.5219250406955	101.124716271418	119.252445681962	87.2555271733238	108.062119126491	111.061282864443	65.332810905818	3.52936921669025	32.897139056688	56.471447664407	19.4952311951738	39.4930285045476	61.1224733177631	33.1670673940169	94.1299882542876	35.1679651927552	1.42615	0.000241145960407023	0.0772545	FRK	6	115931149	116060758	-	13230	protein_coding	fyn related Src family tyrosine kinase [Source:HGNC Symbol;Acc:HGNC:3955]
ENSG00000139292	1.80953852087388	1.62846157092059	12.2164086770841	11.2237595935964	6.58532280553387	30.1156725434484	26.736975504403	0	0	1.73142837140463	0	0	1.97465142522738	0	0	11.2895174019825	0.52943997094743	4.33181	0.000243398060678306	0.0772545	LGR5	12	71439770	71586310	+	5251	protein_coding	leucine rich repeat containing G protein-coupled receptor 5 [Source:HGNC Symbol;Acc:HGNC:4504]
ENSG00000115415	2868.11855558509	2890.51928838404	2739.19030115063	3018.48984570283	2650.59242922738	2244.50335956171	2557.49454151731	2534.07902726183	5100.82086042159	3938.13383075983	3668.62726076987	4065.64185106624	6935.96313111117	2687.28115448786	3553.39899307718	2687.87341854886	4278.55244024196	-0.670669	0.000254749534380066	0.0797936	STAT1	2	190964358	191020960	-	6053	protein_coding	signal transducer and activator of transcription 1 [Source:HGNC Symbol;Acc:HGNC:11362]
ENSG00000147394	218.049391765302	281.723851769262	206.321568768531	253.937560805119	212.376660478467	141.720811969169	78.1542360897933	109.814724714034	2906.43554994442	205.174262011449	135.12810691126	331.418930317954	208.325725361489	471.064578845519	1071.89931441573	187.76235079496	761.349495401117	-2.0191	0.000262443672103626	0.0805664	ZNF185	X	152914442	152973480	+	4812	protein_coding	zinc finger protein 185 with LIM domain [Source:HGNC Symbol;Acc:HGNC:12976]
ENSG00000153832	81.4292334393244	85.4942324733308	74.6558308044027	65.9395876123789	88.9018578747073	113.376649575335	99.7494855356572	31.9713755496556	17.6468460834513	38.0914241709018	35.2946547902544	14.1783499601264	51.3409370559119	50.5841158491833	42.2126312287488	80.189781608099	35.6212798769397	1.17918	0.0002639856834972	0.0805664	FBXO36	2	229922302	230013109	+	3945	protein_coding	F-box protein 36 [Source:HGNC Symbol;Acc:HGNC:27020]
ENSG00000100884	18.0953852087388	113.178079178981	5.42951496759293	2.10445492379933	9.87798420830081	0.885755074807306	20.5669042341561	0	0	1.73142837140463	4.03367483317193	0	0	0	0	21.267259724547	0.823586172082366	4.66888	0.000269938331687851	0.0813403	CPNE6	14	24070837	24078100	+	5996	protein_coding	copine 6 [Source:HGNC Symbol;Acc:HGNC:2319]
ENSG00000161649	32.5716933757298	15.4703849237456	39.3639835150487	48.4024632473845	95.4871806802412	44.2877537403653	30.8503563512342	13.9005980650677	0	10.3885702284278	12.1010244995158	1.7722937450158	21.7211656775012	6.32301448114791	12.0607517796425	40.0418017373521	9.19526005875014	2.12795	0.000285910035469383	0.0850761	CD300LG	17	43847148	43863629	+	4745	protein_coding	CD300 molecule like family member g [Source:HGNC Symbol;Acc:HGNC:30455]
ENSG00000089127	245.19246957841	180.759234372185	314.91186812039	264.459835424115	428.045982359702	201.952157056066	464.812035691928	350.295071239705	1294.39616022115	824.159904788604	266.222538989347	360.661777110714	1701.16220283339	288.750994639088	1010.08796154506	306.303581730313	820.777362875336	-1.42302	0.000293009639208881	0.0861123	OAS1	12	112906777	112933222	+	4947	protein_coding	2'-5'-oligoadenylate synthetase 1 [Source:HGNC Symbol;Acc:HGNC:8086]
ENSG00000167850	178.239544306077	212.514235005137	186.639577011007	143.804419792954	246.94960520752	76.1749364334283	172.761995566911	158.466817941771	512.640878724259	1086.47130305641	182.52378620103	732.843463564031	479.840296330253	230.790028561899	114.577141906604	171.943891408101	477.098128334926	-1.47431	0.000299820179678886	0.0870393	CD300C	17	74541108	74546143	-	1517	protein_coding	CD300c molecule [Source:HGNC Symbol;Acc:HGNC:19320]
ENSG00000183117	3.61907704174775	0	0	1.40296994919955	0	1.77151014961461	0	0	1.76468460834513	32.0314248709856	10.0841870829298	29.2428467927606	3.94930285045476	0	24.121503559285	0.849194642570239	14.456278537823	-4.0201	0.00031039568452827	0.088189	CSMD1	8	2935353	4994972	-	18705	protein_coding	CUB and Sushi multiple domains 1 [Source:HGNC Symbol;Acc:HGNC:14026]
ENSG00000007923	310.33585632987	305.33654454761	436.397265520281	368.279611664882	311.156502561476	277.241338414687	356.835788462609	436.478779243124	590.287001491445	502.114227707343	451.771581315256	460.796373704107	507.485416283437	515.325680213555	426.649094204854	350.257710843067	493.489910702856	-0.495455	0.000311190031841927	0.088189	DNAJC11	1	6634168	6701924	-	5083	protein_coding	DnaJ heat shock protein family (Hsp40) member C11 [Source:HGNC Symbol;Acc:HGNC:25570]
ENSG00000162194	38.9050781987883	43.1542316293955	58.367285901624	48.4024632473845	60.9142359511883	43.401998665558	73.0125100312542	77.8433491643789	168.52738009696	83.1085618274222	85.7155902049035	111.654505935995	77.0114055838678	94.8452172172186	79.9024805401317	55.5001440986965	100.109305915214	-0.864638	0.0003191242539951	0.0893736	LBHD1	11	62662817	62672255	-	3362	protein_coding	LBH domain containing 1 [Source:HGNC Symbol;Acc:HGNC:28351]
ENSG00000143376	588.100019284009	650.570397582774	719.410733206063	670.619635717385	543.289131456545	546.510881156108	448.358512304603	678.349185575301	1497.33489018084	1025.87131005724	870.265345256844	1081.98533133214	844.163484284705	670.239535001678	734.198264585738	605.651062035349	960.579737242742	-0.665626	0.000329800154193428	0.0907816	SNX27	1	151612006	151699091	+	16711	protein_coding	sorting nexin family member 27 [Source:HGNC Symbol;Acc:HGNC:20073]
ENSG00000168772	37.0955396779144	39.8973084875544	59.0459752725731	54.0143430441827	83.9628657705569	66.431630610548	35.9920824097732	5.56023922602706	9.7057653458982	12.9857127855347	19.1599554575667	7.08917498006318	15.797211401819	21.0767149371597	28.644285476651	47.7499980623912	16.3512600549561	1.56423	0.000333944104411665	0.0907816	CXXC4	4	104468312	104494901	-	5819	protein_coding	CXXC finger protein 4 [Source:HGNC Symbol;Acc:HGNC:24593]
ENSG00000154803	313.954933371617	433.170777864876	309.482353152797	397.040495623473	398.412029734799	357.845050222152	443.216786246064	736.731697448586	922.930050164501	847.534187802566	481.015723855753	700.942176153747	856.998718548683	661.808849026814	574.393303505475	423.731765458046	720.80328700822	-0.769044	0.000342389182448887	0.0907816	FLCN	17	17212212	17237188	-	9786	protein_coding	folliculin [Source:HGNC Symbol;Acc:HGNC:27310]
ENSG00000167034	28.952616333982	21.9842312074279	20.3606811284735	19.6415792887937	13.1706456110677	17.7151014961461	16.4535233873249	26.4111363236285	22.9408999084866	135.917127155263	18.1515367492737	89.5008341232977	25.6704685279559	99.0605602046506	39.1974432838382	20.5861893471056	61.4912671361094	-1.57841	0.000342784030821718	0.0907816	NKX3-1	8	23678693	23682927	-	3271	protein_coding	NK3 homeobox 1 [Source:HGNC Symbol;Acc:HGNC:7838]
ENSG00000276256	535.623402178667	414.443469799289	548.381011726886	488.935027296043	474.143241998439	142.606567043976	164.535233873249	432.308599823604	21.1762153001415	86.5714185702315	58.488285080993	99.2484497208846	132.301645490234	286.643323145372	233.677065730574	400.122069217519	131.158057576919	1.61184	0.000343219764054804	0.0907816	AC011043.1	GL000195.1	42939	49164	-	2195	protein_coding	Homo sapiens uncharacterized LOC389831 (LOC389831), transcript variant 3, mRNA. [Source:RefSeq mRNA;Acc:NM_001347681]
ENSG00000180139	192.715852473068	280.909620983801	144.560836012162	162.744514107148	125.121133305144	157.6644033157	160.421853026418	362.805609498266	14.9998191709336	115.139986698408	70.5893095805088	29.2428467927606	128.35234263978	60.0686375709051	104.023984099417	198.367977840213	74.6309895075303	1.41237	0.000352123215195934	0.0919661	ACTA2-AS1	10	88932390	88940820	+	3183	antisense	ACTA2 antisense RNA 1 [Source:HGNC Symbol;Acc:HGNC:45169]
ENSG00000243238	28.952616333982	8.95653864006323	12.2164086770841	28.059398983991	1.64633070138347	13.2863261221096	0	1.39005980650677	177.350803138685	3.46285674280926	1823.22102459371	44.3073436253949	1.97465142522738	12.6460289622958	1.50759397245531	11.81345990814	294.92432892294	-4.63473	0.000355424702581254	0.0919661	IGKV2-30	2	89244781	89245596	-	390	IG_V_gene	immunoglobulin kappa variable 2-30 [Source:HGNC Symbol;Acc:HGNC:5785]
ENSG00000107201	408.955705717496	301.265390620308	457.436636019704	387.219705979076	643.715304240936	466.79292442345	401.054632566044	426.748360597577	852.342665830696	627.642784634178	496.142004480147	528.143536014707	1166.03166659677	656.539670292524	853.298188409708	436.648582520574	740.020073751247	-0.762589	0.00036856070336399	0.0943397	DDX58	9	32455705	32526324	-	4353	protein_coding	DExD/H-box helicase 58 [Source:HGNC Symbol;Acc:HGNC:19102]
ENSG00000072310	1939.82529437679	2006.26465537416	2157.55351024724	2195.6479704973	2005.23079428506	2419.88286437356	2303.49327422549	2139.30204221391	3273.48994848021	3336.46247169672	2115.66244999868	3385.96719985268	3578.06838251201	2874.86391742858	2332.24787538837	2145.90005069919	2985.25174933675	-0.476501	0.000375744596807786	0.0947113	SREBF1	17	17810399	17837002	-	8030	protein_coding	sterol regulatory element binding transcription factor 1 [Source:HGNC Symbol;Acc:HGNC:11289]
ENSG00000211945	43.428924500973	7.32807706914264	50.2230134502346	17993.0895984842	4140.52171397942	81.4894668822722	334.212193805037	25.0210765171218	152.645218621853	0	35.2946547902544	0.886146872507898	0	0	0	2834.41425808606	26.9751457549451	5.69959	0.000378545218603142	0.0947113	IGHV1-18	14	106184901	106185394	-	410	IG_V_gene	immunoglobulin heavy variable 1-18 [Source:HGNC Symbol;Acc:HGNC:5549]
ENSG00000163737	52.4766171053424	22.7984619928882	57.0099071597257	98.2078964439686	134.999117513444	16.8293464213388	20.5669042341561	59.7725716797909	2303.79575619456	42.4199950994134	50.4209354146491	39.8766092628554	47.3916342054571	30.5612366588816	502.02879282762	57.8326028188319	430.927851380491	-2.89979	0.000381948431280303	0.0947113	PF4	4	73981077	73982124	-	604	protein_coding	platelet factor 4 [Source:HGNC Symbol;Acc:HGNC:8861]
ENSG00000179476	335.669395622104	412.000777442908	177.137925817719	231.490041617926	154.755085930046	294.070684836026	238.576089116211	272.451722075326	121.763237975814	126.394271112538	188.574298450788	135.580471493708	174.756651132623	169.667555244136	164.327742997629	264.518965307283	154.437746915319	0.779875	0.000386899076457526	0.0949498	C14orf28	14	44897295	44907257	+	3864	protein_coding	chromosome 14 open reading frame 28 [Source:HGNC Symbol;Acc:HGNC:19834]
ENSG00000099953	1311.01065837312	1595.07810871671	1803.95634798275	2320.51229597606	1005.9080585453	30417.7150239577	15467.3403292971	1648.61093051702	45.8817998169733	1007.69131215749	1395.65149227749	692.080707428668	866.87197567482	579.609660771892	446.247815846773	6946.26646917072	719.147823424873	2.19861	0.000400404403025806	0.0972615	MMP11	22	23768226	23784316	+	5176	protein_coding	matrix metallopeptidase 11 [Source:HGNC Symbol;Acc:HGNC:7157]
ENSG00000116661	24.4287700317973	8.95653864006323	15.6098555318297	36.4772186791883	39.5119368332032	25.6868971694119	8.22676169366245	6.95029903253383	151.762876317681	81.3771334560176	35.2946547902544	85.0700997607582	23.6958171027286	45.3149371148933	39.1974432838382	20.7310347014612	65.9589945465959	-1.67721	0.000404514265007707	0.0972673	FBXO2	1	11637018	11655785	-	3416	protein_coding	F-box protein 2 [Source:HGNC Symbol;Acc:HGNC:13581]
ENSG00000132002	1485.63112563745	1360.57964250415	1651.2512395192	1659.71344990307	1506.39259176587	1245.37163517907	2448.48994907629	1430.37154089546	6936.97519540469	2683.71397567718	2676.34325180957	2461.71601182694	2457.45369869547	2239.40096207322	2026.20629897994	1598.47514681007	3068.82991349529	-0.941125	0.000419057883522252	0.0990283	DNAJB1	19	14514770	14529770	-	3672	protein_coding	DnaJ heat shock protein family (Hsp40) member B1 [Source:HGNC Symbol;Acc:HGNC:5270]
ENSG00000271601	1894.58683135495	1770.13772759068	1852.82198269109	1607.80356178269	1392.79577337041	1982.31985741875	1521.95091332755	1533.23596657696	1079.10463800305	1245.76271322563	1649.77300676732	1139.58487804516	1208.48667223916	1268.81823921701	1103.55878783729	1694.45657676413	1242.15556219066	0.448585	0.000420157883556138	0.0990283	LIX1L	1	145933423	145958001	-	3975	protein_coding	limb and CNS expressed 1 like [Source:HGNC Symbol;Acc:HGNC:28715]
ENSG00000197147	540.147248480852	584.617703960491	559.240041662071	438.42810912486	396.765699033416	419.847905458663	461.727000056805	524.052547053051	442.053494390454	285.685681281764	406.392739442072	298.631496035162	328.779462300359	299.289352107668	351.269395582088	490.603281853776	344.585945877081	0.511189	0.000442029816212343	0.099172	LRRC8B	1	89524836	89597864	+	8213	protein_coding	leucine rich repeat containing 8 VRAC subunit B [Source:HGNC Symbol;Acc:HGNC:30692]
ENSG00000186377	90.4769260436938	182.387695943106	203.606811284735	190.102428116539	113.596818395459	183.351300485112	243.71781517475	147.346339489717	0	64.0628497419713	112.942895328814	31.9012874102843	25.6704685279559	36.8842511400295	57.288570953302	169.323266866639	46.9643318717653	1.85278	0.00044225747691062	0.099172	CYP4X1	1	47023568	47050751	+	2548	protein_coding	cytochrome P450 family 4 subfamily X member 1 [Source:HGNC Symbol;Acc:HGNC:20244]
ENSG00000237094	2.71430778131081	4.88538471276176	12.2164086770841	10.5222746189966	8.23165350691734	9.74330582288037	4.11338084683122	11.1204784520541	71.4697266379776	23.3742830139625	6.05051224975789	50.5103717329502	21.7211656775012	18.9690434434437	10.5531578071872	7.94339930235454	28.9497515089686	-1.87316	0.000443700331301541	0.099172	AL732372.2	1	365389	522928	-	6204	transcribed_unprocessed_pseudogene	pseudogene similar to part of septin 14 SEPT14
ENSG00000275538	0	0	0	0	0	0	0	0	46.7641421211459	0	13.1094432078088	0.886146872507898	0	1.05383574685798	15.0759397245531	0	10.9842153818391	-5.95648	0.000445474814520571	0.099172	RNVU1-19	1	120850819	120850985	-	167	snRNA	RNA, variant U1 small nuclear 19 [Source:HGNC Symbol;Acc:HGNC:48324]
ENSG00000168394	1867.44375354184	1880.05888362782	2497.57688509275	2320.51229597606	1562.36783561291	1488.95428075108	1384.15265495871	1725.0642198749	4874.05888824924	3840.30812777547	3256.18400907804	2973.90890413651	3244.35229164858	2400.63783134249	1596.54201683018	1840.76635117951	3169.42743843721	-0.783836	0.00045019514163285	0.099172	TAP1	6	32845209	32853978	-	4805	protein_coding	transporter 1, ATP binding cassette subfamily B member [Source:HGNC Symbol;Acc:HGNC:43]
ENSG00000126759	285.002317037635	337.091545180561	237.54127983219	390.727130852075	584.447398991131	168.293464213388	343.467300710407	212.679150395535	7581.08507745067	1370.42555596676	387.232783984505	568.020145277563	273.489222393992	277.15880142365	233.677065730574	319.906198401615	1527.29837888967	-2.25578	0.000452780478882542	0.099172	CFP	X	47623172	47630305	-	5617	protein_coding	complement factor properdin [Source:HGNC Symbol;Acc:HGNC:8864]
ENSG00000250423	12.6667696461171	3.25692314184117	9.50165119328762	8.4178196951973	0	14.1720811969169	8.22676169366245	0	0	1.73142837140463	0	0	0	0	0	7.03025082087782	0.247346910200661	4.4346	0.000464782362915675	0.099172	KIAA1210	X	119078635	119150579	-	7824	protein_coding	KIAA1210 [Source:HGNC Symbol;Acc:HGNC:29218]
ENSG00000121060	926.483722687424	1115.4961760806	1168.70309677438	1146.22644849603	1364.8081514469	879.554789283655	1211.3906593918	979.99216358727	1854.68352337073	2333.96544465344	1159.68151453693	3088.22185069002	1971.68944808954	1254.064538761	1353.81938726487	1099.08190096851	1859.44652962379	-0.759156	0.000466075697444039	0.099172	TRIM25	17	56836387	56914080	-	9501	protein_coding	tripartite motif containing 25 [Source:HGNC Symbol;Acc:HGNC:12932]
ENSG00000148483	18.0953852087388	35.8261545602529	9.50165119328762	24.5519741109921	13.1706456110677	21.2581217953753	26.736975504403	11.1204784520541	6.17639612920794	12.1199985998324	6.05051224975789	5.31688123504739	9.8732571261369	2.10767149371597	0	20.0326733045214	5.94924526195693	1.71901	0.000466733130017607	0.099172	TMEM236	10	17752252	17800868	+	5464	protein_coding	transmembrane protein 236 [Source:HGNC Symbol;Acc:HGNC:23473]
ENSG00000159339	68.7624637932073	124.577310175425	63.1181114982678	72.2529523837769	144.877101721745	14.1720811969169	61.7007127024684	43.0918540017097	1297.04318713367	378.317099151912	101.850289537591	384.587742668428	43.4423313550023	54.7994588366152	104.023984099417	74.0690734341896	337.72344182609	-2.19118	0.000469161498250529	0.099172	PADI4	1	17308195	17364004	+	2971	protein_coding	peptidyl arginine deiminase 4 [Source:HGNC Symbol;Acc:HGNC:18368]
ENSG00000165272	328.431241538608	298.822698263928	310.839731894695	312.8622986715	286.461542040723	103.633343752455	201.55566149473	283.57220052738	1471.74696335984	327.239962195475	268.239376405933	206.47222129434	240.90747387774	1134.98109936605	2620.19832412734	265.772339773002	895.683631518101	-1.75222	0.000470235839413696	0.099172	AQP3	9	33441154	33447633	-	2950	protein_coding	aquaporin 3 (Gill blood group) [Source:HGNC Symbol;Acc:HGNC:636]
ENSG00000125347	1558.91743573284	851.685401591467	1470.71986684673	1670.23572452207	1786.26881100106	1012.41805050475	1266.92130082402	1045.32497449309	6990.79807595922	3032.59679251521	2002.71955466986	2505.13720857983	1741.64255705055	2000.18024753645	1616.1407384721	1332.8114456895	2841.31645354046	-1.09233	0.000470759787968718	0.099172	IRF1	5	132481609	132490798	-	7799	protein_coding	interferon regulatory factor 1 [Source:HGNC Symbol;Acc:HGNC:6116]
ENSG00000095917	0	0.814230785460293	26.4688854670155	26.6564290347915	14.8169763124512	31.887182693063	25.7086302926952	23.631016710615	2.64702691251769	6.0599992999162	0	0	1.97465142522738	0	0	18.7479189120115	1.52595394823732	3.56576	0.000479237060514621	0.0994241	TPSD1	16	1256059	1258998	+	1532	protein_coding	tryptase delta 1 [Source:HGNC Symbol;Acc:HGNC:14118]
ENSG00000269981	23.5240007713604	17.9130772801265	35.9705366603031	18.2386093395942	0	23.9153870197973	45.2471893151435	0	260.290979730906	114.274272512706	68.5724721639228	179.001668246595	69.1127998829583	21.0767149371597	36.1822553389275	20.6011000482906	106.930166116168	-2.36523	0.000487334686961974	0.0994241	AL627309.7	1	137682	137965	-	284	processed_pseudogene	novel pseudogene
ENSG00000120332	43.428924500973	17.9130772801265	52.937770934031	43.4920684251861	6.58532280553387	28.3441623938338	26.736975504403	75.0632295513653	0	109.945701584194	87.7324276214894	372.181686453317	104.656525537051	838.853254498956	85.9328564299529	36.8126914244316	228.471778874994	-2.63275	0.000487966819832068	0.0994241	TNN	1	175067858	175148066	+	5008	protein_coding	tenascin N [Source:HGNC Symbol;Acc:HGNC:22942]
ENSG00000138496	1157.19988409884	1091.06925251679	1376.38204428481	1251.449194686	1524.50222948109	1024.81862155205	1132.20807809029	1068.9559912037	1578.51038216472	1817.13407578916	1501.53545664825	1834.32402609135	2610.4891841506	1224.55713784898	2048.82020856677	1203.3231619892	1802.19578160855	-0.582917	0.00049195634966739	0.0994241	PARP9	3	122527924	122564577	-	8938	protein_coding	poly(ADP-ribose) polymerase family member 9 [Source:HGNC Symbol;Acc:HGNC:24118]
ENSG00000173193	1694.63282479838	1542.1531076618	1595.59871110137	1801.41341477222	1929.49958202142	1728.10815094905	1918.89216504677	1540.1862656095	3840.83605006317	3048.17964785785	2556.34142552271	2426.27013692662	3703.45874801395	1270.92591071073	2697.08561672256	1718.81052774506	2791.87107654537	-0.700019	0.000492839418326285	0.0994241	PARP14	3	122680618	122730840	+	10495	protein_coding	poly(ADP-ribose) polymerase family member 14 [Source:HGNC Symbol;Acc:HGNC:29232]
ENSG00000270339	0	0	0	0	0	0	0	0	4.41171152086282	0	8.06734966634386	1.7722937450158	1.97465142522738	8.43068597486388	9.04556383473189	0	4.81460802386366	-4.75452	0.000510581913781312	0.101787	AC243756.1	1	146344131	146344790	-	660	protein_coding	peptidyl-prolyl cis-trans isomerase A-like 4C [Source:NCBI gene;Acc:105371242]
ENSG00000178996	1214.20034750637	1520.98310723983	1469.36248810484	1222.68831072741	1188.65076639886	1229.42804383254	951.219320829721	1704.21332277729	1107.33959173657	697.765633676066	874.299020090016	984.509175356274	1072.23572389847	735.577351306873	753.796986227657	1312.59321342711	889.360497470274	0.561041	0.000513741888802012	0.101787	SNX18	5	54517759	54546585	+	6653	protein_coding	sorting nexin 18 [Source:HGNC Symbol;Acc:HGNC:19245]
ENSG00000065534	4542.84645665386	4678.57009325485	4850.59293417333	5192.39178198754	3745.40234564739	5515.5968508251	3340.06524762695	7774.60449779234	1387.92444446344	1500.28268382211	5651.17844127387	1707.60502332272	2161.25598491137	2181.43999599603	2443.80982935006	4955.00877599517	2433.35662901994	1.02601	0.000517379638328944	0.101787	MYLK	3	123610049	123884331	-	22167	protein_coding	myosin light chain kinase [Source:HGNC Symbol;Acc:HGNC:7590]
ENSG00000101213	47.0480015427208	60.2530781240617	54.2951496759293	40.686128526787	52.682582444271	21.2581217953753	27.7653207161108	18.0707774845879	112.939814934088	70.1228490418875	51.4293541229421	85.9562466332661	54.3029141937529	77.9838452674909	340.716237774901	40.2573950387305	113.35018028119	-1.48473	0.000530488869394674	0.103511	PTK6	20	63528001	63537370	-	2947	protein_coding	protein tyrosine kinase 6 [Source:HGNC Symbol;Acc:HGNC:9617]
ENSG00000250348	0	0	0	3.50742487299888	3.29266140276694	0	0	2.78011961301353	42.352430600283	8.65714185702315	10.0841870829298	8.86146872507898	5.92395427568214	1.05383574685798	9.04556383473189	1.19752573609742	12.282654588941	-3.4702	0.000537828093824549	0.104089	AC113404.1	5	76285542	76311462	-	756	antisense	novel transcript
ENSG00000106031	16.2858466878649	14.6561541382853	26.4688854670155	53.3128580695829	19.7559684166016	20.372366720568	10.2834521170781	18.0707774845879	0	5.19428511421389	8.06734966634386	1.7722937450158	1.97465142522738	8.43068597486388	15.0759397245531	22.400788637698	5.78788652145971	2.01525	0.000546199278419962	0.104857	HOXA13	7	27193503	27200106	-	5086	protein_coding	homeobox A13 [Source:HGNC Symbol;Acc:HGNC:5102]
ENSG00000260528	4.52384630218469	17.0988464946662	9.50165119328762	25.9549440601917	6.58532280553387	13.2863261221096	51.4172605853903	23.631016710615	366.172056231614	78.7799908989106	11.0926057912228	171.026346394024	51.3409370559119	14.7537004560118	13.5683457520978	18.9999017842474	100.961997511399	-2.41084	0.00055089295051831	0.104912	FAM157C	16	90102271	90178344	+	4524	lincRNA	family with sequence similarity 157 member C [Source:HGNC Symbol;Acc:HGNC:34081]
ENSG00000267414	46.1432322822838	72.4665399059661	63.1181114982678	57.5217679171816	115.243149096843	90.3470176303452	142.939984427385	25.0210765171218	22.9408999084866	51.0771369564366	37.3114922068403	26.5844061752369	39.4930285045476	16.8613719497278	33.1670673940169	76.6001099094243	32.4907718707561	1.23365	0.000556625095125041	0.105162	AC120049.1	18	44676927	44679717	-	2065	lincRNA	uncharacterized LOC101927943 [Source:NCBI gene;Acc:101927943]
ENSG00000136044	900.245414134753	698.610013924932	710.587771383724	833.364149824533	783.653413858531	841.467321066941	589.241806308573	792.334089708856	932.6358155104	927.179892887179	868.248507840258	1205.15974661074	996.211644027213	1377.36332114339	1323.66750781577	768.687997526355	1090.06663369071	-0.503258	0.000562791627231589	0.10549	APPL2	12	105173296	105236238	-	5124	protein_coding	adaptor protein, phosphotyrosine interacting with PH domain and leucine zipper 2 [Source:HGNC Symbol;Acc:HGNC:18242]
ENSG00000148204	14.476308166991	0	1.35737874189823	0	0	0.885755074807306	0	2.78011961301353	19.4115306917964	24.2399971996648	10.0841870829298	20.3813780676816	10.8605828387506	29.5074009120236	18.0911276694638	2.43744519958876	18.9394577803301	-2.94579	0.000587667666544839	0.109037	CRB2	9	123356170	123380324	+	6349	protein_coding	crumbs 2, cell polarity complex component [Source:HGNC Symbol;Acc:HGNC:18688]
ENSG00000175711	114.000926815054	86.3084632587911	99.0886481585709	201.326187710136	181.096377152182	139.063546744747	119.288044558106	136.225861037663	391.759983052618	304.731393367215	172.4395991181	210.016808784372	185.617233971374	250.8129077522	174.880900804816	134.549756929406	241.465546692956	-0.848265	0.000590877422259604	0.109037	B3GNTL1	17	82942155	83051810	-	6891	protein_coding	UDP-GlcNAc:betaGal beta-1,3-N-acetylglucosaminyltransferase like 1 [Source:HGNC Symbol;Acc:HGNC:21727]
ENSG00000134256	25.3335392922343	48.8538471276176	25.7901960960664	42.7905834505863	21.4022991179851	20.372366720568	23.6519398692795	34.7514951626691	435.877098261246	12.9857127855347	16.1346993326877	11.5199093426027	10.8605828387506	11.5921932154378	18.0911276694638	30.3682833546258	73.8659033493891	1.0702	0.000636279914945452	0.115669	CD101	1	117001750	117036476	+	3828	protein_coding	CD101 molecule [Source:HGNC Symbol;Acc:HGNC:5949]
ENSG00000074803	0	0	0	4.20890984759865	0	1.77151014961461	0	0	98.8223380673271	1.73142837140463	4.03367483317193	0	3.94930285045476	14.7537004560118	10.5531578071872	0.747552499651658	19.1205146265082	-4.5692	0.000636533237168678	0.115669	SLC12A1	15	48178438	48304078	+	12839	protein_coding	solute carrier family 12 member 1 [Source:HGNC Symbol;Acc:HGNC:10910]
ENSG00000164684	61.5243097097118	102.593078967997	84.8361713686395	148.714814615152	102.072503485775	193.094606307993	135.74156794543	90.3538874229397	5.29405382503538	38.9571383566042	65.5472160390438	43.421196752887	27.6451199531833	75.8761737737749	57.288570953302	114.866367477955	44.8613528076901	1.36222	0.000643573894360848	0.116063	ZNF704	8	80628451	80874781	-	15008	protein_coding	zinc finger protein 704 [Source:HGNC Symbol;Acc:HGNC:32291]
ENSG00000279520	16.2858466878649	19.541538851047	11.537719306135	21.0445492379933	18.1096377152182	11.514815972495	14.3968329639093	37.5316147756827	376.760163881685	47.6142802136273	36.3030734985474	52.282665477966	20.7338399648875	5.26917873428992	46.7354131461148	18.7453194387932	83.6712307024453	-2.16658	0.000655306595330059	0.11729	AC093525.8	16	2516658	2517999	+	1342	TEC	tec
ENSG00000167634	0	0	5.42951496759293	1.40296994919955	3.29266140276694	1.77151014961461	6.17007127024684	0	30.8819806460397	23.3742830139625	10.0841870829298	6.20302810755528	10.8605828387506	2.10767149371597	16.5835336970085	2.25834096742761	14.2993238399946	-2.65783	0.000683850933725211	0.121412	NLRP7	19	54923509	54966312	-	3914	protein_coding	NLR family pyrin domain containing 7 [Source:HGNC Symbol;Acc:HGNC:22947]
ENSG00000099860	1232.29573271511	1546.2242615891	866.686326702021	1041.00370230607	1236.39435673898	889.298095106535	1748.18685990327	1087.02676868829	1755.8611853034	2374.65401138145	2642.05701572761	1755.45695443815	2026.9796879959	1655.57595831389	1307.08397411876	1205.88951296867	1931.09554103988	-0.67979	0.000688534569126816	0.121412	GADD45B	19	2476122	2478259	+	2138	protein_coding	growth arrest and DNA damage inducible beta [Source:HGNC Symbol;Acc:HGNC:4096]
ENSG00000198780	3.61907704174775	0	2.03606811284735	7.71633472059753	0	5.31453044884384	8.22676169366245	8.34035883904059	136.763057146747	6.92571348561852	30.2525612487895	4.43073436253949	9.8732571261369	17.9152076965857	7.53796986227657	4.40664135709244	30.5283572755277	-2.79291	0.000704811512620712	0.123368	FAM169A	5	74777574	74866951	-	6860	protein_coding	family with sequence similarity 169 member A [Source:HGNC Symbol;Acc:HGNC:29138]
ENSG00000188786	521.147094011676	611.48731988068	479.833385261025	587.142923740012	567.984091977297	387.9607227656	445.27347666948	421.18812137155	735.873481679918	953.151318458249	537.48717152016	1046.53945643183	722.722421633221	777.730781181193	562.332551725832	502.752141959665	762.262454661486	-0.601189	0.000712521496547088	0.123807	MTF1	1	37809567	37859620	-	8024	protein_coding	metal regulatory transcription factor 1 [Source:HGNC Symbol;Acc:HGNC:7428]
ENSG00000234665	0	4.88538471276176	9.50165119328762	3.50742487299888	11.5243149096843	12.4005710473023	15.4251781756171	0	0	0	0	1.7722937450158	0	0	0	7.15556561395649	0.253184820716542	4.44148	0.000729979563286315	0.125245	AL512625.3	9	62856999	62898087	-	4241	lincRNA	uncharacterized LOC403323 [Source:NCBI gene;Acc:403323]
ENSG00000229447	0	0	2.03606811284735	1.40296994919955	0	1.77151014961461	0	0	19.4115306917964	1.73142837140463	14.1178619161018	3.54458749003159	6.91127998829583	3.16150724057395	3.01518794491063	0.651318526457689	7.41334052044497	-3.32993	0.000731322160002174	0.125245	AC114495.2	1	31263245	31263681	-	437	processed_pseudogene	general transcription factor IIA, 2, 12kDa (GTF2A2) pseudogene
ENSG00000228863	7.2381540834955	0	2.71475748379646	4.20890984759865	9.87798420830081	0	0	0	59.9992766837343	27.7028539424741	8.06734966634386	23.9259655577132	22.7084913901149	4.21534298743194	7.53796986227657	3.00497570289893	22.0224642985841	-2.91912	0.000740896169844383	0.1257	AL121985.1	1	160670778	160699761	+	4121	antisense	novel transcript, antisense to CD48
ENSG00000117115	156.52508205559	209.257311863295	118.091950545146	157.834119284949	153.108755228663	75.289181358621	186.130483319113	113.984904133555	824.990054401347	752.305627375311	129.077594661502	596.376845197815	157.97211401819	74.8223380269169	361.822553389275	146.277723473617	413.90958958148	-1.501	0.000746626558028848	0.1257	PADI2	1	17066761	17119435	-	5984	protein_coding	peptidyl arginine deiminase 2 [Source:HGNC Symbol;Acc:HGNC:18341]
ENSG00000161558	136.620158325978	163.660387877519	198.177296317142	175.371243649944	133.352786812061	144.378077193591	164.535233873249	123.715322779102	319.407914110468	238.071401068137	196.641648117132	240.14580244964	186.604559683987	201.282627649875	212.570750116199	154.976313353573	227.817814742205	-0.551071	0.000749819636492926	0.1257	TMEM143	19	48332356	48364237	-	3701	protein_coding	transmembrane protein 143 [Source:HGNC Symbol;Acc:HGNC:25603]
ENSG00000228305	96.8103108667523	162.846157092059	126.914912367485	112.237595935964	138.291778916211	111.605139425721	184.073792895697	215.459270008549	212.644495305588	281.357110353252	248.071002240074	147.100380836311	205.363748223647	316.150724057395	263.82894517968	143.529869688555	239.216629456564	-0.740377	0.000758057569512106	0.125828	AC016734.1	2	63622178	63622831	-	654	processed_pseudogene	PRELI domain containing 1 (PRELID1) pseudogene
ENSG00000180739	114.000926815054	40.7115392730147	154.062487205449	155.02817938655	69.1458894581057	115.14815972495	82.2676169366245	177.927655232866	2222.62026421069	180.068550626081	416.476926525002	93.0454216133293	97.7452455487553	116.975767901236	192.97202847428	113.536556754077	474.272029271339	-2.0626	0.000761153242463935	0.125828	S1PR5	19	10512742	10517931	-	2806	protein_coding	sphingosine-1-phosphate receptor 5 [Source:HGNC Symbol;Acc:HGNC:14299]
ENSG00000284675	3.61907704174775	0	6.10820433854204	12.626729542796	6.58532280553387	12.4005710473023	6.17007127024684	0	0	0	0	0.886146872507898	0	1.05383574685798	0	5.93874700577109	0.277140374195126	4.18378	0.00077074985177735	0.126536	AC116667.2	16	73123296	73137580	+	823	lincRNA	novel transcript
ENSG00000239149	0	0	0.678689370949116	0	0	0	0	0	9.7057653458982	4.32857092851157	5.04209354146491	5.31688123504739	1.97465142522738	2.10767149371597	0	0.0848361713686395	4.06794770998077	-4.18063	0.000806901495600003	0.131564	SNORA59A	1	12507246	12507397	+	152	snoRNA	small nucleolar RNA, H/ACA box 59A [Source:HGNC Symbol;Acc:HGNC:32653]
ENSG00000197903	87.7626182623829	140.861925884631	138.45263167362	122.058385580361	151.462424527279	53.1453044884384	80.2109265132089	136.225861037663	509.111509507569	232.877115953923	102.858708245884	246.348830557196	171.794673994782	183.367419953289	224.631501895842	113.772509745948	238.712822872641	-1.07185	0.000815983044503371	0.131653	HIST1H2BK	6	27146418	27146798	-	381	protein_coding	histone cluster 1 H2B family member k [Source:HGNC Symbol;Acc:HGNC:13954]
ENSG00000280123	50.6670785844685	59.4388473386014	71.9410733206063	61.7306777647802	82.3165350691734	54.916814638053	47.3038797385591	63.9427510993112	36.1760344710751	10.3885702284278	40.3367483317193	8.86146872507898	23.6958171027286	37.9380868868874	43.7202252012041	61.5322071941941	28.7309929924459	1.11	0.000818510980183382	0.131653	AC023632.6	8	94427712	94429888	-	2177	TEC	TEC
ENSG00000133392	210.811237681806	260.553851347294	276.22657397629	637.649841911196	238.717951700603	500.451617266128	316.730325206004	492.081171503395	209.115126088898	153.23141086931	340.845523403028	86.842393505774	132.301645490234	83.2530240017808	171.865712859906	366.65282132409	168.207833745561	1.12482	0.000843289910595063	0.134728	MYH11	16	15703172	15857033	-	16104	protein_coding	myosin heavy chain 11 [Source:HGNC Symbol;Acc:HGNC:7569]
ENSG00000211666	79.6196949184505	74.0950014768867	24.4328173541682	41.3876135013867	69.1458894581057	32.7729377678703	41.1338084683122	25.0210765171218	431.465386740384	5.19428511421389	27.2273051239105	17.722937450158	8.88593141352321	4.21534298743194	0	48.4511049327878	70.6730269756602	1.81816	0.000849069291544546	0.134747	IGLV2-14	22	22758700	22759218	+	402	IG_V_gene	immunoglobulin lambda variable 2-14 [Source:HGNC Symbol;Acc:HGNC:5888]
ENSG00000279602	0	4.88538471276176	9.50165119328762	4.20890984759865	0	6.20028552365114	6.17007127024684	0	247.93818747249	1.73142837140463	68.5724721639228	18.6090843226659	2.96197713784107	9.48452172172186	0	3.87078781844325	49.8996673128638	-3.66049	0.00087293680177663	0.136805	AC109326.1	17	43360041	43361361	-	1321	TEC	TEC
ENSG00000260025	85.9530797415091	158.775003164757	57.6885965306748	44.1935533997858	85.6091964719404	113.376649575335	74.040855242962	62.5526912928044	1.76468460834513	54.5399936992458	26.2188864156175	15.0644968326343	27.6451199531833	25.2920579245916	55.7809769808466	85.2737031774711	29.4723166306378	1.54161	0.000878614302822313	0.136805	AC009414.2	2	36354749	36355114	-	366	lincRNA	novel transcript
ENSG00000282939	6.33338482305856	6.51384628368235	17.645923644677	21.0445492379933	18.1096377152182	7.08604059845845	6.17007127024684	8.34035883904059	269.996745076804	50.2114227707343	10.0841870829298	32.7874342827922	16.7845371144327	8.43068597486388	10.5531578071872	11.4054765515469	56.9783100156778	-2.32372	0.000879273748738893	0.136805	TRBV7-2	7	142352819	142353358	+	394	TR_V_gene	T cell receptor beta variable 7-2 [Source:HGNC Symbol;Acc:HGNC:12236]
ENSG00000196372	732.863100953919	1143.18002278625	837.502683751209	790.573566373947	1056.94431028819	998.245969307834	808.279336402336	710.320561124957	438.524125173764	629.374213005583	806.734966634386	579.540054620165	642.749038911512	623.870762139927	580.423679395296	884.73869387358	614.459548554376	0.525835	0.000902333173456128	0.138082	ASB13	10	5638867	5666595	-	3003	protein_coding	ankyrin repeat and SOCS box containing 13 [Source:HGNC Symbol;Acc:HGNC:19765]
ENSG00000140090	40.7146167196622	3.25692314184117	55.6525284178275	40.686128526787	46.0972596387371	55.8025697128603	25.7086302926952	20.8508970976015	659.992043521077	157.559981797821	62.5219599141649	49.6242248604423	65.1634970325035	29.5074009120236	55.7809769808466	36.0961941935015	154.307155002697	-2.09637	0.000905611882240106	0.138082	SLC24A4	14	92322581	92501483	+	14412	protein_coding	solute carrier family 24 member 4 [Source:HGNC Symbol;Acc:HGNC:10978]
ENSG00000244968	10.8572311252433	22.7984619928882	16.2885449027788	7.71633472059753	6.58532280553387	16.8293464213388	26.736975504403	4.1701794195203	0	5.19428511421389	0	2.65844061752369	0	2.10767149371597	9.04556383473189	13.997799611538	2.71513729431221	2.44867	0.000906024182998421	0.138082	LIFR-AS1	5	38556786	38671216	+	5098	antisense	LIFR antisense RNA 1 [Source:HGNC Symbol;Acc:HGNC:43600]
ENSG00000167641	456.003707260217	479.581932636113	424.859546214146	565.396889527419	523.533163039943	867.154218236353	709.558196078386	996.672881265351	131.469003321712	418.139951694218	498.158841896733	197.610752569261	283.362479520129	170.721390990994	447.755409819228	627.845066782241	306.745404258896	1.03394	0.000911395408063144	0.138082	PPP1R14A	19	38251237	38256591	-	1501	protein_coding	protein phosphatase 1 regulatory inhibitor subunit 14A [Source:HGNC Symbol;Acc:HGNC:14871]
ENSG00000283787	149.286927972095	109.106925251679	84.1574819976904	144.505904767554	128.413794707911	42.5162435907507	164.535233873249	77.8433491643789	854.989692743214	257.117113153587	113.951314037107	157.734143306406	257.692010992173	150.698511800692	239.707441620395	112.545732665663	290.270032521939	-1.36767	0.000916483599696651	0.138082	PRR33	11	1888577	1891895	-	3319	protein_coding	proline rich 33 [Source:HGNC Symbol;Acc:HGNC:35118]
ENSG00000244509	776.292025454892	551.234241756619	1091.33250848618	1038.89924738227	819.872689288967	691.774713424506	679.73618493886	1031.42437642802	2435.26475951628	1604.16838610639	915.644187130028	1233.51644653099	1192.68946083734	1426.89360124571	1065.86893852591	835.070748395039	1410.57796855609	-0.756631	0.00093067070681142	0.139337	APOBEC3C	22	39014083	39020352	+	2818	protein_coding	apolipoprotein B mRNA editing enzyme catalytic subunit 3C [Source:HGNC Symbol;Acc:HGNC:17353]
ENSG00000140479	86.857849001946	72.4665399059661	56.3312177887766	77.8648321805751	88.9018578747073	47.8307740395945	57.5873318556371	33.3614353561624	404.112775311034	111.677129955599	88.7408463297824	132.922030876185	108.605828387506	59.0148018240471	162.820149025174	65.1502297504206	152.556223101332	-1.22829	0.000958712748995343	0.142638	PCSK6	15	101297142	101525202	-	13239	protein_coding	proprotein convertase subtilisin/kexin type 6 [Source:HGNC Symbol;Acc:HGNC:8569]
ENSG00000152229	179.144313566514	174.245388088503	193.426470720498	258.847955627317	288.107872742107	103.633343752455	147.053365274216	165.417116974305	1409.10065976358	280.49139616755	299.500356363016	478.519311154265	303.108993772403	179.152076965857	295.488418601242	188.734478343239	463.623030398274	-1.29804	0.000978759621358634	0.144717	PSTPIP2	18	45983536	46072272	-	4120	protein_coding	proline-serine-threonine phosphatase interacting protein 2 [Source:HGNC Symbol;Acc:HGNC:9581]
ENSG00000160201	26.2383085526712	80.608847760569	162.206759656839	190.803913091139	92.1945192774742	227.639054225478	55.5306414322215	34.7514951626691	393.524667660963	349.748531023735	182.52378620103	607.896754540418	121.441062651484	208.659477877881	298.503606546152	108.746692394883	308.899698071666	-1.50315	0.000984855294366268	0.144719	U2AF1	21	43092956	43107587	-	11112	protein_coding	U2 small nuclear RNA auxiliary factor 1 [Source:HGNC Symbol;Acc:HGNC:12453]
ENSG00000280143	144.76308166991	314.293083187673	80.7640351429448	98.2078964439686	134.999117513444	192.208851233185	128.543151463476	262.721303429779	26.4702691251769	48.4799943993296	156.304899785412	32.7874342827922	97.7452455487553	68.499323545769	46.7354131461148	169.562565010548	68.1460828333357	1.31454	0.00100040226901137	0.14545	AP000892.3	11	117204967	117210292	+	5326	TEC	novel transcript
ENSG00000233030	1.80953852087388	0	1.35737874189823	0	0	0	0	1.39005980650677	8.82342304172563	3.46285674280926	2.01683741658596	35.4458749003159	7.89860570090952	2.10767149371597	0	0.569622133659859	8.53646704229461	-3.89197	0.00100435020671669	0.14545	AC243772.2	1	149785659	149793020	-	3543	antisense	novel transcript, antisense to FCGR1A
ENSG00000125726	12.6667696461171	30.1265390620309	31.2197110636593	11.9252445681962	29.6339526249024	9.74330582288037	24.6802850809873	51.4322128407503	31.7643229502123	50.2114227707343	10.0841870829298	35.4458749003159	126.377691214552	288.750994639088	97.9936082095955	25.1785025886905	91.5183002524897	-1.8686	0.00101314924569012	0.14545	CD70	19	6583183	6604103	-	1532	protein_coding	CD70 molecule [Source:HGNC Symbol;Acc:HGNC:11937]
ENSG00000020426	277.76416295414	342.791160678783	261.29540781541	266.564290347915	238.717951700603	235.610849898743	234.46270826938	227.96980826711	142.057110971783	134.185698783859	283.365657030328	159.506437051422	117.491759801029	168.613719497278	170.358118887451	260.64704249151	167.939786003307	0.637106	0.00101469206683854	0.14545	MNAT1	14	60734742	60969953	+	3865	protein_coding	MNAT1, CDK activating kinase assembly factor [Source:HGNC Symbol;Acc:HGNC:7181]
ENSG00000226352	2.71430778131081	3.25692314184117	5.42951496759293	1.40296994919955	4.9389921041504	4.42877537403653	0	1.39005980650677	24.7055845168318	16.448569528344	4.03367483317193	10.6337624700948	5.92395427568214	11.5921932154378	7.53796986227657	2.94519289057977	11.5536726716913	-1.97797	0.00102038076710975	0.14545	PSPC1-AS2	13	19674624	19675884	+	376	antisense	PSPC1 antisense RNA 2 [Source:HGNC Symbol;Acc:HGNC:52951]
ENSG00000162669	27.1430778131081	57.8103857676808	20.3606811284735	12.626729542796	36.2192754304363	90.3470176303452	45.2471893151435	9.73041864554736	0	8.65714185702315	9.07576837463684	15.0644968326343	3.94930285045476	4.21534298743194	24.121503559285	37.4355969091913	9.29765092306657	2.03555	0.00103505503794665	0.146664	HFM1	1	91260766	91404869	-	5827	protein_coding	HFM1, ATP dependent DNA helicase homolog [Source:HGNC Symbol;Acc:HGNC:20193]
ENSG00000144278	1.80953852087388	0	1.35737874189823	1.40296994919955	3.29266140276694	3.54302029922922	2.05669042341561	0	1.76468460834513	0	7.05893095805088	0.886146872507898	62.2015198946624	32.6689081525975	12.0607517796425	1.68278241717293	16.6629917522581	-3.32414	0.00107211434193579	0.148155	GALNT13	2	153871913	154453849	+	6520	protein_coding	polypeptide N-acetylgalactosaminyltransferase 13 [Source:HGNC Symbol;Acc:HGNC:23242]
ENSG00000248890	23.5240007713604	2.44269235638088	12.2164086770841	8.4178196951973	9.87798420830081	47.8307740395945	95.636104688826	13.9005980650677	1.76468460834513	3.46285674280926	2.01683741658596	2.65844061752369	2.96197713784107	6.32301448114791	18.0911276694638	26.7307978127265	5.32556266767383	2.38022	0.00107431992405015	0.148155	HHIP-AS1	4	144642922	144661357	-	1557	antisense	HHIP antisense RNA 1 [Source:HGNC Symbol;Acc:HGNC:44182]
ENSG00000125384	86.857849001946	117.249233106282	82.8001032557921	122.759870554961	171.218392943881	63.774365386126	85.3526525717479	137.61592084417	2180.2678336104	174.874265511868	322.693986653754	142.669646473772	318.906205174222	139.106318585254	179.403682722182	108.453548458113	493.988848390208	-0.908577	0.00107487757869136	0.148155	PTGER2	14	52314305	52328606	+	2473	protein_coding	prostaglandin E receptor 2 [Source:HGNC Symbol;Acc:HGNC:9594]
ENSG00000275426	10.8572311252433	32.5692314184117	20.3606811284735	23.8504891363924	16.4633070138347	19.4866116457607	15.4251781756171	30.5813157431488	7.94108073755307	0.865714185702315	3.02525612487895	7.97532185257108	11.8479085513643	13.6998647091538	9.04556383473189	21.1992556733603	7.7715299994222	1.46395	0.00107610372080824	0.148155	AC253576.2	4	149738	150317	+	580	sense_intronic	novel transcript
ENSG00000150967	331.145549319919	352.561930104307	278.262642089137	249.72865095752	202.498676270167	366.702600970225	301.305147030387	236.31016710615	110.29278802157	179.202836440379	251.096258364953	197.610752569261	193.515839672283	217.090163852745	138.698645465889	289.814420480977	183.929612055297	0.657476	0.00107669792206735	0.148155	ABCB9	12	122920951	122981649	-	13291	protein_coding	ATP binding cassette subfamily B member 9 [Source:HGNC Symbol;Acc:HGNC:50]
ENSG00000104435	34.3812318966036	17.9130772801265	69.9050052077589	56.118797967982	49.389921041504	1.77151014961461	61.7007127024684	1.39005980650677	2.64702691251769	4.32857092851157	15.1262806243947	1.7722937450158	11.8479085513643	0	9.04556383473189	36.5712895065706	6.39537779950514	2.52729	0.00109655721792634	0.15002	STMN2	8	79610814	79666175	+	2362	protein_coding	stathmin 2 [Source:HGNC Symbol;Acc:HGNC:10577]
ENSG00000084110	76.0006178767028	36.6403853457132	48.1869453373872	84.8796819265728	136.645448214828	15.9435913465315	26.736975504403	33.3614353561624	419.112594481968	220.75711735409	29.2441425404965	303.948377270209	57.264891331594	95.8990529640766	189.95684052937	57.2993851135376	188.026145210258	-1.71946	0.00110820740554233	0.150748	HAL	12	95972662	95996365	-	5146	protein_coding	histidine ammonia-lyase [Source:HGNC Symbol;Acc:HGNC:4806]
ENSG00000273311	23.5240007713604	3.25692314184117	43.4361197407434	28.7608839585908	16.4633070138347	28.3441623938338	4.11338084683122	31.9713755496556	89.1165727214289	38.0914241709018	53.4461915395281	67.3471623106002	48.3789599180708	55.8532945834732	78.3948865676764	22.4837691770864	61.5183559730971	-1.44453	0.00112825527749687	0.152603	DGCR11	22	19046162	19048375	-	2214	sense_intronic	DiGeorge syndrome critical region gene 11 [Source:HGNC Symbol;Acc:HGNC:17226]
ENSG00000166091	0	4.88538471276176	2.03606811284735	12.626729542796	23.0486298193686	12.4005710473023	0	5.56023922602706	356.466290885716	14.7171411569394	16.1346993326877	3.54458749003159	6.91127998829583	8.43068597486388	63.3189468431232	7.56970280763787	67.0748045245225	-3.16541	0.00115606134726797	0.154695	CMTM5	14	23376773	23379772	+	2910	protein_coding	CKLF like MARVEL transmembrane domain containing 5 [Source:HGNC Symbol;Acc:HGNC:19176]
ENSG00000204209	1660.25159290178	1459.91579833031	1172.09654362912	1257.0610744828	1336.82052952338	1295.85967444309	1127.06635203176	1622.1997941934	1746.1554199575	2035.29405058614	1438.00507802579	1836.98246670887	1934.17107101022	2103.45615072854	1664.38374559067	1366.40891994195	1822.63542608682	-0.416259	0.00115671802037807	0.154695	DAXX	6	33318558	33323016	-	3084	protein_coding	death domain associated protein [Source:HGNC Symbol;Acc:HGNC:2681]
ENSG00000272870	180.953852087388	150.632695310154	98.4099587876218	99.6108663931681	103.718834187159	94.7757930043818	127.514806251768	69.5029903253383	37.9407190794202	66.6599922990782	60.5051224975789	83.2978060157424	56.2775656189803	90.6298742297867	70.8569167053998	115.639974543372	66.5954280637124	0.801267	0.00116812962179482	0.155348	AC097534.2	4	173363780	173370446	-	2495	antisense	uncharacterized LOC105377540 [Source:NCBI gene;Acc:105377540]
ENSG00000081189	2080.06452974452	2610.4238981857	2375.41279832191	2235.63261404948	1914.68260570897	2318.90678584553	1765.6687285023	2094.8201284057	1051.7520265737	858.788472216696	2689.45269501738	829.433472667392	1157.14573518324	1050.67423961741	1237.73465138581	2174.45151109551	1267.85447038023	0.778548	0.00118102763951558	0.155811	MEF2C	5	88717117	88904257	-	11755	protein_coding	myocyte enhancer factor 2C [Source:HGNC Symbol;Acc:HGNC:6996]
ENSG00000095627	0	0	0	1.40296994919955	0	2.65726522442192	0	0	2.64702691251769	4.32857092851157	10.0841870829298	0	1.97465142522738	16.8613719497278	30.1518794491063	0.507529396702684	9.43538396400293	-4.04743	0.00118470370487201	0.155811	TDRD1	10	114179270	114232304	+	5256	protein_coding	tudor domain containing 1 [Source:HGNC Symbol;Acc:HGNC:11712]
ENSG00000246084	0	0.814230785460293	2.03606811284735	0	0	0	2.05669042341561	0	32.6466652543848	1.73142837140463	2.01683741658596	2.65844061752369	0.98732571261369	6.32301448114791	12.0607517796425	0.613373665215407	8.34635194761475	-3.65236	0.00121037400958178	0.157867	LINC02325	14	97458816	97581601	+	2014	lincRNA	long intergenic non-protein coding RNA 2325 [Source:HGNC Symbol;Acc:HGNC:53245]
ENSG00000272908	36.1907704174775	26.0553851347294	44.7934984826416	39.9846435521872	29.6339526249024	29.2299174686411	32.9070467746498	19.4608372910947	109.410445717398	40.6885667280088	52.4377728312351	99.2484497208846	71.0874513081857	45.3149371148933	33.1670673940169	32.2820064682905	64.479241544946	-0.993673	0.00121687689309277	0.157867	AC006033.2	7	38326070	38329643	-	1968	lincRNA	novel transcript
ENSG00000115267	317.574010413365	298.822698263928	369.207017796319	502.964726788039	452.740942880454	336.586928426776	427.791608070447	308.593277044502	617.639612920794	464.888517722143	552.613452144554	613.213635775465	889.580467064934	341.442781981987	725.152700751006	376.785151210479	600.647309765841	-0.672539	0.00122023139855792	0.157867	IFIH1	2	162267079	162318703	-	5108	protein_coding	interferon induced with helicase C domain 1 [Source:HGNC Symbol;Acc:HGNC:18873]
ENSG00000054356	485.861092854635	202.743465579613	437.75464426218	260.250925576517	307.863841158709	208.152442579717	247.831196021581	290.522499559914	40.5877459919379	1189.49129115498	247.062583531781	2405.00261198643	845.150809997318	1474.31620985432	642.235032265964	305.122513449108	977.692326397534	-1.68001	0.00123858136481192	0.159375	PTPRN	2	219289623	219309648	-	8261	protein_coding	protein tyrosine phosphatase, receptor type N [Source:HGNC Symbol;Acc:HGNC:9676]
ENSG00000011454	1268.48650313259	1082.92694466219	868.722394814868	1067.66013134086	1010.84705064945	1141.73829142662	1214.47569502692	1155.13969920712	793.225731451134	965.271317058081	1057.83122499934	746.13566665165	770.114055838678	670.239535001678	640.727438293509	1101.24958878258	806.220709899153	0.448835	0.00127206627118792	0.162804	RABGAP1	9	122940833	123104866	+	9162	protein_coding	RAB GTPase activating protein 1 [Source:HGNC Symbol;Acc:HGNC:17155]
ENSG00000095397	180.049082826951	161.217695521138	305.410216927102	297.429629230305	202.498676270167	209.923952729332	150.13840090934	222.409569041082	217.938549130623	509.905655378663	341.853942111321	689.422266811144	656.571598888104	320.366067044827	195.987216419191	216.134652931927	418.863613683411	-0.954461	0.00128291305196848	0.163314	WHRN	9	114402080	114505450	-	5542	protein_coding	whirlin [Source:HGNC Symbol;Acc:HGNC:16361]
ENSG00000083223	694.862792015568	799.574631322008	762.168163575857	890.184432767115	882.433255941539	654.573000282599	836.044657118446	706.150381705437	1362.33651764244	1016.34845401452	846.063296257812	1333.65104312439	923.1495412938	950.559843665902	1004.05758565524	778.248914341071	1062.30946880773	-0.449648	0.00130449167583904	0.165178	TUT7	9	86287733	86354454	-	6707	protein_coding	terminal uridylyl transferase 7 [Source:HGNC Symbol;Acc:HGNC:25817]
ENSG00000120889	1958.82544884597	1534.82503059265	1711.65459353367	1646.38523538567	1545.90452859908	1399.49301819554	1285.43151463476	1964.15450659406	2074.3867571097	1847.43407228874	2157.00761703869	3058.09285702476	2103.00376786716	3041.36996543214	1947.81141241227	1630.83423454768	2318.44377845335	-0.507737	0.00133368940842248	0.167981	TNFRSF10B	8	23020133	23069179	-	5158	protein_coding	TNF receptor superfamily member 10b [Source:HGNC Symbol;Acc:HGNC:11905]
ENSG00000137642	594.433404107068	857.385017089689	714.659907609419	862.125033783124	1264.3819786625	353.416274848115	738.351862006205	528.222726472571	8374.3108089018	3125.22821038536	694.800490013865	2216.25332814225	614.116593245715	477.387593326667	981.44367606841	739.122025572337	2354.79152858344	-1.67201	0.00134137113065539	0.16806	SORL1	11	121452203	121633693	+	19449	protein_coding	sortilin related receptor 1 [Source:HGNC Symbol;Acc:HGNC:11185]
ENSG00000135744	108.572311252433	180.759234372185	63.1181114982678	59.6262228409809	87.2555271733238	170.95072943781	272.511481102569	80.6234687773924	3.52936921669025	54.5399936992458	43.3620044565982	59.3718404580292	52.3282627685256	47.4226086086093	67.8417287604892	127.92713580687	46.9136868525982	1.45084	0.00137722146604933	0.171648	AGT	1	230702523	230714297	-	2291	protein_coding	angiotensinogen [Source:HGNC Symbol;Acc:HGNC:333]
ENSG00000234636	72.381540834955	44.7826932003161	36.6492260312522	40.686128526787	52.682582444271	53.1453044884384	40.1054632566044	44.4819138082165	18.5291883876238	32.897139056688	33.2778173736684	15.9506437051422	34.5563999414791	23.1843864308757	33.1670673940169	48.1143565738551	27.366091755642	0.819266	0.00139434346279469	0.172877	MED14OS	X	40735400	40738701	+	900	antisense	MED14 opposite strand [Source:HGNC Symbol;Acc:HGNC:40162]
ENSG00000172260	96.8103108667523	266.253466845516	118.770639916095	246.922711059121	199.2060148674	363.159580670996	286.908314066478	68.1129305188315	20.293872995969	128.125699483943	34.2862360819614	118.743680916058	82.9353598595499	40.0457583806034	123.622705741336	205.767996101399	78.2933304942029	1.39631	0.00141446867310515	0.173217	NEGR1	1	71395940	72282734	-	13406	protein_coding	neuronal growth regulator 1 [Source:HGNC Symbol;Acc:HGNC:17302]
ENSG00000116117	133.00108128423	129.462694888187	128.950980480332	112.939080910564	268.351904325505	211.695462878946	79.1825813015011	186.268014071907	10.5881076500708	52.8085653278412	107.900801787349	54.9411060954897	47.3916342054571	59.0148018240471	125.130299713791	156.231475017646	65.396473800578	1.26031	0.00142426802525743	0.173217	PARD3B	2	204545793	205620162	+	10382	protein_coding	par-3 family cell polarity regulator beta [Source:HGNC Symbol;Acc:HGNC:14446]
ENSG00000137757	24.4287700317973	24.4269235638088	8.14427245138939	8.4178196951973	19.7559684166016	7.08604059845845	18.5102138107405	6.95029903253383	29.1172960376946	74.4514199703991	27.2273051239105	71.7778966731397	36.5310513667065	8.43068597486388	39.1974432838382	14.7150384500659	40.9618712043646	-1.48515	0.00144198375001036	0.173217	CASP5	11	104994235	105023168	-	1592	protein_coding	caspase 5 [Source:HGNC Symbol;Acc:HGNC:1506]
ENSG00000240219	9.04769260436938	3.25692314184117	12.8950980480332	4.91039482219843	13.1706456110677	8.85755074807306	16.4535233873249	8.34035883904059	155.292245534371	26.8371397567718	22.1852115824456	53.1688123504739	16.7845371144327	6.32301448114791	3.01518794491063	9.61652340024356	40.515164109222	-2.08915	0.00145756810884384	0.173217	AL512306.2	1	204626775	204629712	+	2219	lincRNA	novel transcript
ENSG00000165512	710.243869442996	758.048861263533	760.13209546301	755.499317643958	714.507524400425	1030.1331520009	596.440222790528	792.334089708856	496.758717249153	483.934229807594	677.657371972884	464.340961194138	664.470204589013	476.333757579809	612.083152816858	764.667391589275	553.654056458493	0.467095	0.00146240038974669	0.173217	ZNF22	10	45000475	45005326	+	2551	protein_coding	zinc finger protein 22 [Source:HGNC Symbol;Acc:HGNC:13012]
ENSG00000156218	30.7621548548559	10.5850002109838	10.8590299351859	42.0890984759865	23.0486298193686	45.1735088151726	8.22676169366245	58.3825118732841	1.76468460834513	8.65714185702315	22.1852115824456	8.86146872507898	1.97465142522738	4.21534298743194	7.53796986227657	28.6408369598125	7.88521014968982	1.85862	0.00146571031622765	0.173217	ADAMTSL3	15	83654086	84039842	+	9754	protein_coding	ADAMTS like 3 [Source:HGNC Symbol;Acc:HGNC:14633]
ENSG00000008130	2080.96929900496	2214.707736452	2092.39933063612	2218.09548968449	2413.52080822816	1507.55513732204	2002.1881271951	1943.30360949646	5576.4033623706	4345.88521222562	2114.65403129038	4387.3131657866	2798.0810695472	2168.79396703373	2416.67313784587	2059.09244225242	3401.11484944286	-0.724274	0.00147371568444221	0.173217	NADK	1	1751232	1780457	-	5570	protein_coding	NAD kinase [Source:HGNC Symbol;Acc:HGNC:29831]
ENSG00000149591	8287.68642560235	10233.252511665	4970.72095283132	5816.71340938134	4249.17954027073	11644.1362134168	7445.21933276452	10469.930462609	1477.92335948904	3976.22525493073	7195.06748367043	2778.07044531226	4678.93655207628	4452.45603047498	3435.80666322566	7889.60485606763	3999.21225559705	0.980263	0.00147703046613129	0.173217	TAGLN	11	117199321	117204782	+	3917	protein_coding	transgelin [Source:HGNC Symbol;Acc:HGNC:11553]
ENSG00000226673	3.61907704174775	9.77076942552352	8.14427245138939	0	9.87798420830081	3.54302029922922	6.17007127024684	11.1204784520541	0	0	2.01683741658596	0	1.97465142522738	0	0	6.53070914356146	0.570212691687621	3.47423	0.00148008911058857	0.173217	LINC01108	6	14280127	14285454	-	3697	lincRNA	long intergenic non-protein coding RNA 1108 [Source:HGNC Symbol;Acc:HGNC:49234]
ENSG00000188056	7.2381540834955	0	0	1.40296994919955	0	0	0	0	58.2345920753892	6.92571348561852	4.03367483317193	23.9259655577132	3.94930285045476	0	25.6290975317403	1.08014050408688	17.528335190584	-3.97608	0.00148525050152599	0.173217	TREML4	6	41228324	41238882	+	2712	protein_coding	triggering receptor expressed on myeloid cells like 4 [Source:HGNC Symbol;Acc:HGNC:30807]
ENSG00000163536	176.430005785203	396.530392519163	329.84303428127	258.146470652717	192.620692061866	159.435913465315	114.146318499566	194.608372910947	58.2345920753892	64.0628497419713	212.776347449819	77.980924780695	93.7959426983005	166.506048003562	45.2278191736594	227.720150022006	102.654931989057	1.15006	0.00149015440493982	0.173217	SERPINI1	3	167735243	167825568	+	2418	protein_coding	serpin family I member 1 [Source:HGNC Symbol;Acc:HGNC:8943]
ENSG00000088726	60.6195404492748	8.14230785460293	7.46558308044027	25.2534590855919	21.4022991179851	3.54302029922922	6.17007127024684	12.5105382585609	517.052590245122	10.3885702284278	4.03367483317193	1.7722937450158	3.94930285045476	88.5222027360707	355.792177499454	18.1383524269915	140.215830305388	-2.95	0.00149397361643861	0.173217	TMEM40	3	12733525	12769457	-	3562	protein_coding	transmembrane protein 40 [Source:HGNC Symbol;Acc:HGNC:25620]
ENSG00000108244	28.0478470735451	32.5692314184117	2.71475748379646	30.1638539077903	47.7435903401206	5.31453044884384	46.2755345268513	13.9005980650677	80.2931496797033	442.379948893883	15.1262806243947	164.823318286469	26.6577942405696	14.7537004560118	85.9328564299529	25.8412429080534	118.566721230141	-2.2043	0.00149819163856886	0.173217	KRT23	17	40922696	40937634	-	2902	protein_coding	keratin 23 [Source:HGNC Symbol;Acc:HGNC:6438]
ENSG00000229500	12.6667696461171	5.69961549822205	0	2.8059398983991	8.23165350691734	2.65726522442192	16.4535233873249	4.1701794195203	0	1.73142837140463	0	0	0.98732571261369	0	1.50759397245531	6.58561832261534	0.603764008067662	3.51409	0.00149896001616959	0.173217	RPL17P1	20	20253303	20253838	-	536	processed_pseudogene	ribosomal protein L17 pseudogene 1 [Source:HGNC Symbol;Acc:HGNC:16559]
ENSG00000265148	2.71430778131081	7.32807706914264	9.50165119328762	16.1341544157948	11.5243149096843	4.42877537403653	4.11338084683122	23.631016710615	281.467195031048	22.5085688282602	38.3199109151333	1.7722937450158	5.92395427568214	12.6460289622958	28.644285476651	9.92195978758787	55.8974624620123	-2.5056	0.00152060687104237	0.17487	TSPOAP1-AS1	17	58325450	58415766	+	3601	antisense	TSPOAP1, SUPT4H1 and RNF43 antisense RNA 1 [Source:HGNC Symbol;Acc:HGNC:44148]
ENSG00000284959	0	0	1.35737874189823	2.10445492379933	1.64633070138347	5.31453044884384	0	0	50.2935113378361	3.46285674280926	3.02525612487895	3.54458749003159	1.97465142522738	8.43068597486388	13.5683457520978	1.30283685199061	12.0428421211064	-3.17827	0.00155080180150021	0.177396	AC007262.2	14	81012099	81170414	-	8011	antisense	uncharacterized LOC101928462 [Source:NCBI gene;Acc:101928462]
ENSG00000161960	61.5243097097118	8.95653864006323	93.659133190978	68.0440425361782	82.3165350691734	43.401998665558	69.9274743961308	111.204784520541	1252.92607192504	109.945701584194	247.062583531781	71.7778966731397	96.7579198361416	83.2530240017808	43.7202252012041	67.3793520910418	272.206203250469	-2.01681	0.00155747581099747	0.177396	EIF4A1	17	7572706	7579005	+	5316	protein_coding	eukaryotic translation initiation factor 4A1 [Source:HGNC Symbol;Acc:HGNC:3282]
ENSG00000178209	10878.0408182333	10390.3990532588	11882.4935065771	11507.8610083093	11400.8401070805	10055.0916092125	10336.9260680869	12598.1120263708	21210.6266500043	13912.0269642362	16235.541203517	17636.0950566522	12569.6436472849	14116.1298291627	11020.5119386483	11131.2205246412	15242.9393270722	-0.453626	0.00157242211066865	0.17779	PLEC	8	143915147	143976734	-	16991	protein_coding	plectin [Source:HGNC Symbol;Acc:HGNC:9069]
ENSG00000117281	4.52384630218469	4.88538471276176	3.39344685474558	13.3282145173957	29.6339526249024	2.65726522442192	0	9.73041864554736	326.466652543848	8.65714185702315	44.3704231648912	17.722937450158	6.91127998829583	6.32301448114791	9.04556383473189	8.51906611024493	59.9281447600138	-2.84212	0.00157587000209836	0.17779	CD160	1	145719471	145739288	+	3971	protein_coding	CD160 molecule [Source:HGNC Symbol;Acc:HGNC:17013]
ENSG00000105664	61.5243097097118	140.861925884631	81.4427245138939	994.705693982482	52.682582444271	200.180646906451	96.6644499005338	0	0	67.5257064847806	11.0926057912228	31.0151405377764	44.429657067616	35.8304153931715	13.5683457520978	203.507791667747	29.0659815752379	2.80711	0.0015926742223888	0.178123	COMP	19	18782773	18791314	-	3101	protein_coding	cartilage oligomeric matrix protein [Source:HGNC Symbol;Acc:HGNC:2227]
ENSG00000271897	8.14292334393244	13.0276925673647	1.35737874189823	5.6118797967982	0	7.08604059845845	0	2.78011961301353	0	0	1.00841870829298	0	0	0	0	4.75075433268319	0.144059815470426	4.28158	0.00159378853610324	0.178123	AL357518.1	6	11607552	11607981	+	430	lincRNA	novel transcript
ENSG00000211812	0	0	0	0	0	0	0	1.39005980650677	26.4702691251769	0	0	2.65844061752369	3.94930285045476	4.21534298743194	6.03037588982126	0.173757475813346	6.18910449577265	-4.77048	0.00161583911325816	0.179378	TRAV26-2	14	22202583	22203368	+	327	TR_V_gene	T cell receptor alpha variable 26-2 [Source:HGNC Symbol;Acc:HGNC:12124]
ENSG00000256779	0	0	0	2.8059398983991	0	0	0	0	1.76468460834513	5.19428511421389	6.05051224975789	3.54458749003159	1.97465142522738	2.10767149371597	30.1518794491063	0.350742487299888	7.25546740434259	-4.00636	0.0016242662010486	0.179378	AP002383.3	11	95037482	95039811	+	1547	transcribed_processed_pseudogene	serine/arginine-rich splicing factor 8 (SRSF8) pseudogene
ENSG00000256812	3.61907704174775	0	5.42951496759293	4.91039482219843	13.1706456110677	1.77151014961461	8.22676169366245	0	5.29405382503538	17.3142837140463	6.05051224975789	23.0398186852053	5.92395427568214	23.1843864308757	101.008796154506	4.64098803573549	25.9736864764441	-2.50267	0.00162915305783104	0.179378	CAPNS2	16	55566672	55567687	+	1016	protein_coding	calpain small subunit 2 [Source:HGNC Symbol;Acc:HGNC:16371]
ENSG00000131097	99.5246186480631	137.60500274279	68.5476264658607	77.1633472059753	103.718834187159	333.929663202354	191.272209377652	125.105382585609	5.29405382503538	78.7799908989106	99.8334521210052	20.3813780676816	58.2522170442077	24.2382221777336	55.7809769808466	142.108335551933	48.9371844450601	1.53941	0.00163516564790639	0.179378	HIGD1B	17	44846353	44850480	+	861	protein_coding	HIG1 hypoxia inducible domain family member 1B [Source:HGNC Symbol;Acc:HGNC:24318]
ENSG00000260059	0	0	0	0	0	1.77151014961461	0	0	29.9996383418672	3.46285674280926	16.1346993326877	1.7722937450158	0	4.21534298743194	0	0.221438768701827	7.94069016425884	-4.77237	0.00164683387921931	0.179804	AC092620.3	2	138599663	138602426	-	2764	lincRNA	novel transcript
ENSG00000214960	110.381849773306	82.2373093314896	101.803405642367	77.1633472059753	100.426172784392	75.289181358621	97.6927951122416	148.736399296224	17.6468460834513	57.1371362563528	78.6566592468526	68.2333091831081	41.467679929775	61.1224733177631	55.7809769808466	99.2163075630771	54.2921544283071	0.867529	0.00165763251495743	0.179804	ISPD	7	16087527	16421322	-	6309	protein_coding	isoprenoid synthase domain containing [Source:HGNC Symbol;Acc:HGNC:37276]
ENSG00000120162	456.003707260217	729.550783772423	657.650000449693	717.61912901557	393.473037630649	706.83254969623	508.002534583656	429.52848021059	159.703957055234	369.659957294888	585.891269518223	324.329755337891	310.020273760699	202.336463396733	318.102328188071	574.832527827379	324.292000650248	0.827165	0.00166241421706186	0.179804	MOB3B	9	27325209	27529781	-	7087	protein_coding	MOB kinase activator 3B [Source:HGNC Symbol;Acc:HGNC:23825]
ENSG00000068383	733.767870214356	845.985786093245	749.273065527824	744.275558050362	595.971713900816	705.946794621423	801.080919920381	879.907857518783	407.642144527724	551.459936292375	711.943608054845	644.228776313242	551.915073351053	564.85596031588	483.937665158156	757.026195730899	559.426166287611	0.436403	0.00166925687494632	0.179804	INPP5A	10	132537820	132783480	+	3706	protein_coding	inositol polyphosphate-5-phosphatase A [Source:HGNC Symbol;Acc:HGNC:6076]
ENSG00000124357	3184.78779673802	3335.08929724536	3100.25304649556	2909.75967463987	3384.85592204441	3658.16845895417	3335.95186678012	3793.47321195696	5070.82122207972	5852.22789534765	2956.68365271502	4241.98507869531	6541.03284606569	4448.24068748755	4078.04169549163	3337.79240935681	4741.29043969751	-0.506624	0.00168063708320409	0.180214	NAGK	2	71064344	71079805	+	8894	protein_coding	N-acetylglucosamine kinase [Source:HGNC Symbol;Acc:HGNC:17174]
ENSG00000233913	3963.79412997422	725.479629845121	346.131579184049	363.369216842684	358.900092901596	272.81256304065	322.900396476251	3938.03943183367	599.992766837343	299.537108253001	2886.09434313451	262.299474262338	319.893530886835	252.920579245916	357.29977147191	1286.42838001228	711.148224870265	1.84781	0.00170828116011707	0.181642	RPL10P9	5	168616352	168616996	+	645	processed_pseudogene	ribosomal protein L10 pseudogene 9 [Source:HGNC Symbol;Acc:HGNC:35579]
ENSG00000285774	0	0	0	2.10445492379933	1.64633070138347	0	0	0	112.057472629916	1.73142837140463	0	0	0	2.10767149371597	15.0759397245531	0.468848203147849	18.7103588885128	-5.37776	0.00171505643644409	0.181642	AL133444.1	14	54684753	54687912	-	1001	lincRNA	uncharacterized LOC729451 [Source:NCBI gene;Acc:729451]
ENSG00000265763	18.0953852087388	9.77076942552352	19.0033023865752	9.82078964439686	23.0486298193686	5.31453044884384	20.5669042341561	5.56023922602706	0	6.92571348561852	0	1.7722937450158	5.92395427568214	4.21534298743194	6.03037588982126	13.8975687992037	3.55252576908138	1.98746	0.00172240597814801	0.181642	ZNF488	10	47365496	47384273	-	3496	protein_coding	zinc finger protein 488 [Source:HGNC Symbol;Acc:HGNC:23535]
ENSG00000228956	21.7144622504865	19.541538851047	76.6918989172501	53.3128580695829	32.9266140276694	24.8011420946046	11.3117973287859	19.4608372910947	419.112594481968	86.5714185702315	41.3451670400123	143.555793346279	25.6704685279559	21.0767149371597	78.3948865676764	32.4701436038151	116.532434781612	-1.83914	0.00172447302670722	0.181642	SATB1-AS1	3	18445024	18920401	+	13505	processed_transcript	SATB1 antisense RNA 1 [Source:HGNC Symbol;Acc:HGNC:50687]
ENSG00000165905	7.2381540834955	9.77076942552352	1.35737874189823	27.3579140093912	6.58532280553387	7.97179567326576	34.9637371980654	4.1701794195203	338.819444802264	29.4342823138787	9.07576837463684	8.86146872507898	2.96197713784107	51.6379515960412	70.8569167053998	12.4269064195867	73.0925442364487	-2.55169	0.00173953387978283	0.182292	LARGE2	11	45921621	45929096	+	3115	protein_coding	LARGE xylosyl- and glucuronyltransferase 2 [Source:HGNC Symbol;Acc:HGNC:16522]
ENSG00000134250	2215.77991881006	1302.76925673647	2237.63885601923	1802.81638472142	1498.16093825896	1735.19419154751	1609.36025632272	2169.88335795706	4383.4765671293	2492.39114063696	1903.89452125715	3919.42761710243	2739.82885250299	3233.1680713603	1797.05201516673	1821.45039504668	2924.17696930798	-0.683078	0.00174596224580021	0.182292	NOTCH2	1	119911553	120069626	-	16807	protein_coding	notch 2 [Source:HGNC Symbol;Acc:HGNC:7882]
ENSG00000177409	583.576172981825	528.43577976373	867.36501607297	912.631951954308	1056.94431028819	418.962150383856	786.684086956472	849.326541775634	2195.26765278134	1049.24559307121	1035.64601341689	1183.89222167055	1741.64255705055	696.585428673128	1373.41810890679	750.490751272123	1325.09965365292	-0.82089	0.00178425740834724	0.18407	SAMD9L	7	93130055	93148369	-	7135	protein_coding	sterile alpha motif domain containing 9 like [Source:HGNC Symbol;Acc:HGNC:1349]
ENSG00000141542	336.574164882541	319.178467900435	315.590557491339	258.146470652717	297.985856950408	371.131376344261	293.078385336725	321.103815303063	140.292426363438	231.145687582518	238.995233865437	213.561396274403	232.021542464217	298.23551636081	217.093532033565	314.098636857686	224.477904992055	0.485694	0.00178745076759498	0.18407	RAB40B	17	82654973	82698728	-	6194	protein_coding	RAB40B, member RAS oncogene family [Source:HGNC Symbol;Acc:HGNC:18284]
ENSG00000065000	3707.74442927057	3835.02699951798	3523.75521396781	3347.48629879013	3477.05044132189	3129.37267929421	3510.77055277045	3330.58329639021	4005.83406094344	5698.99648447834	3878.37835209481	5021.79432650226	4229.70335283705	4828.67539210329	3630.2862856724	3482.72373891541	4470.52403637594	-0.360428	0.00178775965659465	0.18407	AP3D1	19	2100988	2164468	-	8613	protein_coding	adaptor related protein complex 3 subunit delta 1 [Source:HGNC Symbol;Acc:HGNC:568]
ENSG00000139344	0	0	8.8229618223385	0	14.8169763124512	0.885755074807306	7.19841648195464	0	44.1171152086282	58.8685646277574	10.0841870829298	21.2675249401895	51.3409370559119	4.21534298743194	15.0759397245531	3.96551371144396	29.2813730896288	-2.92969	0.00179391424681497	0.18407	AMDHD1	12	95943293	95968716	+	2686	protein_coding	amidohydrolase domain containing 1 [Source:HGNC Symbol;Acc:HGNC:28577]
ENSG00000268182	5.42861556262163	37.4546161311735	2.71475748379646	4.20890984759865	1.64633070138347	0	10.2834521170781	0	0	0	0	1.7722937450158	0	0	0	7.71708523045647	0.253184820716542	4.56122	0.00181170892108166	0.185098	SMIM17	19	56643145	56655766	+	1076	protein_coding	small integral membrane protein 17 [Source:HGNC Symbol;Acc:HGNC:27114]
ENSG00000273136	284.097547777198	225.541927572501	140.488699786467	192.206883040338	210.730329777084	194.866116457607	247.831196021581	125.105382585609	673.227178083666	197.382834340128	296.475100238137	505.103717329502	340.627370851723	275.051129929934	271.366915041957	202.608510377298	365.604892259292	-0.852174	0.00185171750339239	0.188377	NBPF26	1	120723923	120841481	+	6032	protein_coding	NBPF member 26 [Source:HGNC Symbol;Acc:HGNC:49571]
ENSG00000245812	52.4766171053424	105.035771324378	149.990350979755	110.834625986765	120.182141200993	178.922525111076	173.790340778619	87.5737678099262	11.4704499542433	55.4057078849481	105.883964370763	27.4705530477448	69.1127998829583	50.5841158491833	57.288570953302	122.350767537107	53.8880231347347	1.18627	0.00190686748145758	0.193162	LINC02202	5	159100483	159117478	+	3214	lincRNA	long intergenic non-protein coding RNA 2202 [Source:HGNC Symbol;Acc:HGNC:53068]
ENSG00000137193	1619.53697618212	2257.86196808139	1694.00866988899	1884.188641775	1834.01240134118	1057.59155931992	1664.89089775494	1805.68768865229	5289.64211351452	2187.65974726975	3904.59723851043	2376.64591206618	1906.52595105703	2600.86662324551	2051.83539651168	1727.22235037448	2902.53899745359	-0.74902	0.00191643958676549	0.193273	PIM1	6	37170203	37175426	+	2977	protein_coding	Pim-1 proto-oncogene, serine/threonine kinase [Source:HGNC Symbol;Acc:HGNC:8986]
ENSG00000237424	28.952616333982	19.541538851047	33.2557791765067	34.372763755389	47.7435903401206	36.3159580670996	61.7007127024684	22.2409569041082	167.645037792787	100.422845541469	81.6819153717316	63.8025748205686	27.6451199531833	46.3687728617513	60.3037588982126	35.5154895163402	78.2671464628147	-1.14747	0.00192420435119562	0.193273	FOXD2-AS1	1	47432133	47434641	-	2509	lincRNA	FOXD2 adjacent opposite strand RNA 1 [Source:HGNC Symbol;Acc:HGNC:44256]
ENSG00000256826	0	0	0	0	0	1.77151014961461	0	0	3.52936921669025	5.19428511421389	5.04209354146491	8.86146872507898	1.97465142522738	4.21534298743194	0	0.221438768701827	4.11674443001534	-3.83521	0.00195317976761386	0.195237	ATP5MFP4	17	64491523	64491789	+	267	processed_pseudogene	ATP synthase membrane subunit f pseudogene 4 [Source:HGNC Symbol;Acc:HGNC:32451]
ENSG00000264112	174.620467264329	105.850002109838	151.347729721653	149.416299589752	228.839967492302	189.551586008764	254.001267291828	219.629449428069	493.229348032463	254.519970596481	232.944721615679	270.274796114909	241.894799590354	340.388946235129	262.321351207225	184.157096113317	299.36770477032	-0.706222	0.00197110501362782	0.195237	AC015813.1	17	57989039	57994850	-	5812	lincRNA	novel transcript
ENSG00000101336	1640.34666917217	1735.12580381588	1789.02518182187	2182.3197559799	2229.13176967322	767.063894783127	1582.62328081831	1287.19538082526	5359.34715554415	6573.36781203768	1514.64489985606	5082.05231383279	2729.95559537685	1431.10894423314	1882.98487159669	1651.60396711122	3510.49451321105	-1.08797	0.0019777914104489	0.195237	HCK	20	32052188	32101856	+	3092	protein_coding	HCK proto-oncogene, Src family tyrosine kinase [Source:HGNC Symbol;Acc:HGNC:4840]
ENSG00000169704	9.04769260436938	0	6.78689370949116	7.01484974599775	6.58532280553387	0	0	0	564.699074670441	36.3599957994972	7.05893095805088	31.0151405377764	20.7338399648875	6.32301448114791	45.2278191736594	3.67934485817402	101.631116512209	-2.5871	0.00197916172757774	0.195237	GP9	3	129060767	129062406	+	889	protein_coding	glycoprotein IX platelet [Source:HGNC Symbol;Acc:HGNC:4444]
ENSG00000103489	397.193705331816	300.451159834848	498.157998276651	468.59196303265	294.693195547641	255.983216619311	304.390182665511	411.457702726003	1203.51490289138	462.291375165036	377.148596901575	822.344297687329	575.610890453781	806.184346346358	366.345335306641	366.364890504304	659.062820678871	-0.847026	0.00198757056491968	0.195237	XYLT1	16	17101769	17470881	-	11004	protein_coding	xylosyltransferase 1 [Source:HGNC Symbol;Acc:HGNC:15516]
ENSG00000105509	689.434176452946	482.838855777954	1065.54231239011	628.530537241399	457.679934984604	86.803997331116	184.073792895697	611.626314862977	12.3527922584159	2263.84259561155	368.072828526939	2049.65771611077	1584.65776874497	9163.10181893018	1525.68510012478	525.816240242101	2423.91008861537	-2.20457	0.00199297226018415	0.195237	HAS1	19	51713112	51723994	-	2241	protein_coding	hyaluronan synthase 1 [Source:HGNC Symbol;Acc:HGNC:4818]
ENSG00000176945	65.1433867514595	177.502311230344	16.2885449027788	99.6108663931681	59.2679052498049	101.86183360284	135.74156794543	36.1415549691759	41.4700882961105	19.0457120854509	12.1010244995158	48.7380779879344	24.6831428153422	57.9609660771892	19.5987216419191	86.4447463806252	31.9425333433517	1.43536	0.00201060285296243	0.195702	MUC20	3	195720882	195741123	+	4249	protein_coding	mucin 20, cell surface associated [Source:HGNC Symbol;Acc:HGNC:23282]
ENSG00000187699	175.525236524766	146.561541382853	114.019814319451	96.1034415201692	192.620692061866	131.091751071481	182.017102472282	246.040585751697	1758.50821221592	134.185698783859	117.984988870279	192.293871334214	177.718628270464	342.496617728845	590.976837202483	160.497520638071	473.452122058009	-1.56213	0.00201415484562622	0.195702	C2orf88	2	189879609	190203484	+	5997	protein_coding	chromosome 2 open reading frame 88 [Source:HGNC Symbol;Acc:HGNC:28191]
ENSG00000167207	247.906777359721	311.850390831292	332.557791765067	333.205362934893	284.81521133934	186.008565709534	227.264291787425	229.359868073616	920.283023251984	601.671359063109	335.803429861563	527.257389142199	335.690742288654	232.897700055615	405.54277859048	269.121032475111	479.878060321943	-0.834455	0.00206061857050991	0.199403	NOD2	16	50693588	50734041	+	6873	protein_coding	nucleotide binding oligomerization domain containing 2 [Source:HGNC Symbol;Acc:HGNC:5331]
ENSG00000148053	32.5716933757298	21.1700004219676	49.5443240792855	35.7757337045885	36.2192754304363	79.7179567326576	7.19841648195464	23.631016710615	5.29405382503538	12.1199985998324	14.1178619161018	17.722937450158	21.7211656775012	13.6998647091538	1.50759397245531	35.7285521171544	12.3119251643197	1.52703	0.00208081189974728	0.200314	NTRK2	9	84668551	85027070	+	20363	protein_coding	neurotrophic receptor tyrosine kinase 2 [Source:HGNC Symbol;Acc:HGNC:8032]
ENSG00000174837	46.1432322822838	48.0396163421573	39.3639835150487	63.8351326885796	59.2679052498049	25.6868971694119	12.3401425404937	43.0918540017097	751.755643155024	167.948552026249	48.4040979980632	89.5008341232977	52.3282627685256	22.1305506840177	24.121503559285	42.2210954736862	165.169920616352	-1.97006	0.00208686702742539	0.200314	ADGRE1	19	6887566	6940459	+	3707	protein_coding	adhesion G protein-coupled receptor E1 [Source:HGNC Symbol;Acc:HGNC:3336]
ENSG00000115266	48.8575400635946	43.1542316293955	32.5770898055576	59.6262228409809	46.0972596387371	31.0014276182557	53.4739510088059	51.4322128407503	103.23404958819	51.0771369564366	61.5135412058719	101.906890338408	71.0874513081857	79.0376810143488	57.288570953302	45.7774919307597	75.0207601949633	-0.720855	0.00209852425454943	0.200624	APC2	19	1446302	1473244	+	12610	protein_coding	APC2, WNT signaling pathway regulator [Source:HGNC Symbol;Acc:HGNC:24036]
ENSG00000162630	32.5716933757298	30.9407698474911	16.9672342737279	21.0445492379933	59.2679052498049	19.4866116457607	13.3684877522015	13.9005980650677	12.3527922584159	5.19428511421389	21.1767928741526	3.54458749003159	4.93662856306845	12.6460289622958	6.03037588982126	25.9434811809721	9.41164159314279	1.44707	0.00211996842282306	0.200781	B3GALT2	1	193179045	193186654	-	3274	protein_coding	beta-1,3-galactosyltransferase 2 [Source:HGNC Symbol;Acc:HGNC:917]
ENSG00000267523	9.95246186480631	17.0988464946662	16.9672342737279	23.8504891363924	11.5243149096843	24.8011420946046	34.9637371980654	48.6520932277368	112.939814934088	56.2714220706505	35.2946547902544	44.3073436253949	49.3662856306845	36.8842511400295	34.6746613664722	23.4762898999605	52.8197762225106	-1.18294	0.00212042463214344	0.200781	AC008735.2	19	55661901	55674715	-	561	antisense	novel transcript, antisense to U2AF2A
ENSG00000159023	196.334929514815	172.616926517582	244.328173541682	449.651868718456	535.057477949627	185.122810634727	125.458115828352	350.295071239705	4981.70464935829	431.991378665455	340.845523403028	340.280399043033	249.793405291263	141.21399007897	919.632323197742	282.358171743118	1057.92309557683	-1.90636	0.00212663466816514	0.200781	EPB41	1	28887091	29120046	+	19993	protein_coding	erythrocyte membrane protein band 4.1 [Source:HGNC Symbol;Acc:HGNC:3377]
ENSG00000142039	447.860783916284	433.170777864876	553.810526694478	686.05230515858	561.398769171763	573.083533400327	504.917498948533	651.938049251673	1127.63346473254	811.174192003069	657.488997807024	615.872076392989	778.012661539587	882.060520120133	636.204656376143	551.529030550814	786.920938424497	-0.51379	0.00214510950358798	0.200781	CCDC97	19	41310189	41324883	+	3821	protein_coding	coiled-coil domain containing 97 [Source:HGNC Symbol;Acc:HGNC:28289]
ENSG00000276216	0	0	0.678689370949116	0	0	0	0	0	51.1758536420087	0	12.1010244995158	0.886146872507898	4.93662856306845	0	0	0.0848361713686395	9.87137908244297	-5.44524	0.00214691482552902	0.200781	AC245014.3	1	145281116	145281462	+	347	lincRNA	novel transcript
ENSG00000103313	136.620158325978	160.403464735678	108.590299351859	197.818762837137	442.862958672153	48.7165291144018	165.563579084957	79.2334089708856	1888.21253092929	1025.87131005724	183.532204909323	659.293273145876	233.008868176831	36.8842511400295	223.123907923387	167.476145136631	607.132335183139	-1.86009	0.00215077178266758	0.200781	MEFV	16	3242028	3256627	-	4819	protein_coding	MEFV, pyrin innate immunity regulator [Source:HGNC Symbol;Acc:HGNC:6998]
ENSG00000198523	374.574473820892	1102.46848351324	134.380495447925	240.609346287723	192.620692061866	213.466973028561	139.854948792262	1252.4438856626	4.41171152086282	39.8228525423065	336.811848569856	26.5844061752369	122.428388364098	124.352618129242	126.637893686246	456.302412326883	111.578531283978	2.03257	0.00219505554455201	0.201184	PLN	6	118548298	118560730	+	2001	protein_coding	phospholamban [Source:HGNC Symbol;Acc:HGNC:9080]
ENSG00000117262	393.574628290068	337.091545180561	255.865892847817	223.773706897328	381.948722720965	277.241338414687	276.6248619494	218.239389621562	225.879629868176	141.111412269477	246.054164823488	127.605149641137	235.970845314672	161.236869269272	200.509998336557	295.545010740298	191.195438503254	0.628067	0.00220628188502474	0.201184	GPR89A	1	145607990	145670648	+	5557	protein_coding	G protein-coupled receptor 89A [Source:HGNC Symbol;Acc:HGNC:31984]
ENSG00000196735	372.764935300018	552.862703327539	381.423426473403	1099.92844017245	500.484533220574	227.639054225478	216.980839670347	834.035883904059	2191.73828356465	448.439948193799	1005.3934521681	871.082375675264	2224.44483051864	788.269138649772	1040.23984099417	523.264977036733	1224.22969568063	-1.22634	0.00221113930825458	0.201184	HLA-DQA1	6	32628179	32647062	+	6927	protein_coding	major histocompatibility complex, class II, DQ alpha 1 [Source:HGNC Symbol;Acc:HGNC:4942]
ENSG00000264384	0.904769260436938	0	0	2.10445492379933	0	0	0	1.39005980650677	17.6468460834513	5.19428511421389	0	1.7722937450158	1.97465142522738	12.6460289622958	7.53796986227657	0.549910498842879	6.68172502749725	-3.55471	0.00221741462618343	0.201184	RN7SL431P	1	154166245	154166549	-	305	misc_RNA	RNA, 7SL, cytoplasmic 431, pseudogene [Source:HGNC Symbol;Acc:HGNC:46447]
ENSG00000284948	1.80953852087388	3.25692314184117	4.75082559664381	13.3282145173957	0	4.42877537403653	11.3117973287859	4.1701794195203	4.41171152086282	45.8828518422227	14.1178619161018	26.5844061752369	13.8225599765917	27.3997294183076	9.04556383473189	5.38203173738716	20.1806692405793	-1.87492	0.00222650738635889	0.201184	AC107959.4	8	23084355	23103558	+	1242	lincRNA	uncharacterized LOC254896 [Source:NCBI gene;Acc:254896]
ENSG00000136943	14.476308166991	4.88538471276176	15.6098555318297	4.20890984759865	0	1.77151014961461	6.17007127024684	22.2409569041082	1.76468460834513	15.5828553426417	9.07576837463684	10.6337624700948	35.5437256540928	48.4764443554673	239.707441620395	8.67037457289385	51.5406689179534	-2.56407	0.00223066338023049	0.201184	CTSV	9	97029679	97039643	-	4700	protein_coding	cathepsin V [Source:HGNC Symbol;Acc:HGNC:2538]
ENSG00000110047	3573.8385787259	2983.34159792651	2410.02595624031	2940.62501352226	3778.32895967506	1817.56941350459	3239.28741687959	3875.48674054086	6691.68403484472	7066.824897888	3769.46913159917	5814.89577739682	3430.95685133257	4934.05896678908	3132.78027476214	3077.31295962689	4977.2385620875	-0.694044	0.00223073174376397	0.201184	EHD1	11	64851642	64888296	-	7101	protein_coding	EH domain containing 1 [Source:HGNC Symbol;Acc:HGNC:3242]
ENSG00000029559	144.76308166991	273.581543914659	209.715015623277	183.789063345141	159.694078034196	233.839339749129	216.980839670347	661.66846789722	0	8.65714185702315	84.7071714966105	128.491296513645	155.010136880349	27.3997294183076	51.2581950634807	260.503928737985	65.0748101756309	2.00052	0.00223484759115656	0.201184	IBSP	4	87799581	87812435	+	1546	protein_coding	integrin binding sialoprotein [Source:HGNC Symbol;Acc:HGNC:5341]
ENSG00000188293	0	0	0	3.50742487299888	0	0	0	0	0	0	0	0	0	424.695805983768	1310.09916206367	0.43842810912486	247.827852578205	-9.08767	0.00224280068190514	0.201184	IGFL1	19	46229752	46231243	+	769	protein_coding	IGF like family member 1 [Source:HGNC Symbol;Acc:HGNC:24093]
ENSG00000181418	82.3340026997613	52.9250010549191	12.2164086770841	27.3579140093912	19.7559684166016	26.5726522442192	45.2471893151435	77.8433491643789	9.7057653458982	5.19428511421389	28.2357238322035	10.6337624700948	4.93662856306845	20.0228791903017	27.1366915041957	43.0315606976874	15.1236765742823	1.52348	0.00226852545097342	0.201184	DDN	12	48995149	48999309	-	3749	protein_coding	dendrin [Source:HGNC Symbol;Acc:HGNC:24458]
ENSG00000275131	204.477852858748	175.873849659423	211.072394365175	206.938067506934	217.315652582618	155.892893166086	100.777830747365	168.197236587319	637.933485916763	156.694267612119	395.300133650849	460.796373704107	264.603290980469	253.974414992774	185.434058612004	180.068222184208	336.390860781298	-0.902807	0.00228323534493748	0.201184	AC241952.1	1	120489860	120701289	-	9444	transcribed_unprocessed_pseudogene	phosphodiesterase 4D interacting protein-like [Source:NCBI gene;Acc:100996724]
ENSG00000132530	182.763390608261	105.035771324378	179.173993930567	199.923217760936	330.912470978077	189.551586008764	266.341409832322	311.373396657515	554.993309324542	221.622831539793	456.813674856721	287.111586692559	476.878319192412	228.682357068183	698.016009246811	220.634404637602	417.731155417289	-0.923268	0.00228402053136112	0.201184	XAF1	17	6755447	6775647	+	6615	protein_coding	XIAP associated factor 1 [Source:HGNC Symbol;Acc:HGNC:30932]
ENSG00000095303	1161.72373040103	796.317708180167	703.122188303284	818.632965357938	841.274988406952	632.429123412417	692.076327479353	475.400453825314	6279.63017879613	940.165605672714	612.11015593384	2747.05530477448	1329.92773489064	798.807496118352	862.34375224444	765.122185670807	1938.57717549009	-1.34133	0.00228510099185194	0.201184	PTGS1	9	122370530	122395703	+	5791	protein_coding	prostaglandin-endoperoxide synthase 1 [Source:HGNC Symbol;Acc:HGNC:9604]
ENSG00000169583	45.2384630218469	55.3676934112999	42.0787409988452	78.5663171551748	92.1945192774742	96.5473031539964	45.2471893151435	25.0210765171218	777.343569976028	93.49713205585	76.6398218302667	14.1783499601264	57.264891331594	122.244946635526	345.239019692267	60.0326628563628	212.343961640237	-1.82271	0.002286296599978	0.201184	CLIC3	9	136994635	136996803	-	1177	protein_coding	chloride intracellular channel 3 [Source:HGNC Symbol;Acc:HGNC:2064]
ENSG00000137166	341.098011184725	301.265390620308	327.128276797474	416.682074912267	469.204249894288	384.417702466371	417.508155953369	397.557104660935	602.639793749861	629.374213005583	431.603207149396	497.128395476931	670.394158864695	941.07532194418	342.223831747356	381.857620811217	587.776988848286	-0.624505	0.00229041338870131	0.201184	FOXP4	6	41546426	41602384	+	6170	protein_coding	forkhead box P4 [Source:HGNC Symbol;Acc:HGNC:20842]
ENSG00000168314	21.7144622504865	71.6523091205058	16.2885449027788	15.4326694411951	23.0486298193686	8.85755074807306	20.5669042341561	34.7514951626691	0	12.1199985998324	7.05893095805088	7.08917498006318	3.94930285045476	5.26917873428992	19.5987216419191	26.5390707099041	7.8693296806586	1.78341	0.00231180581839628	0.201184	MOBP	3	39467198	39529479	+	9237	protein_coding	myelin-associated oligodendrocyte basic protein [Source:HGNC Symbol;Acc:HGNC:7189]
ENSG00000125430	598.957250409253	341.162699107863	415.357895020859	418.786529836066	367.131746408513	162.093178689737	205.669042341561	383.656506595867	524.111328678503	705.557061347386	355.971804027423	1438.21637408032	473.916342054571	1306.7563261039	467.354131461148	361.601856051215	753.126195393321	-1.05861	0.00231535347486605	0.201184	HS3ST3B1	17	14301083	14349404	+	5367	protein_coding	heparan sulfate-glucosamine 3-sulfotransferase 3B1 [Source:HGNC Symbol;Acc:HGNC:5198]
ENSG00000014257	41.6193859800991	50.4823086985382	42.0787409988452	39.9846435521872	19.7559684166016	10.6290608976877	44.2188441034357	37.5316147756827	238.232422126592	102.154273912873	50.4209354146491	164.823318286469	59.2395427568214	11.5921932154378	72.3645106778551	35.7875709278847	99.8324566272425	-1.47801	0.00232240106058238	0.201184	ACPP	3	132317367	132368298	+	4193	protein_coding	acid phosphatase, prostate [Source:HGNC Symbol;Acc:HGNC:125]
ENSG00000213463	973.531724230145	1044.65809774556	1045.18163126164	1073.27201113766	1081.63927080894	968.130296764386	965.61615379363	941.07048900508	622.93366674583	727.199915989944	745.221425428514	970.330825396148	796.771850079248	746.115708775453	963.352548398946	1011.63745934338	795.989420116298	0.347203	0.00232357207587101	0.201184	SYNJ2BP	14	70366496	70417061	-	7031	protein_coding	synaptojanin 2 binding protein [Source:HGNC Symbol;Acc:HGNC:18955]
ENSG00000284690	32.5716933757298	39.0830777020941	8.14427245138939	18.9400943141939	36.2192754304363	3.54302029922922	10.2834521170781	6.95029903253383	360.878002406578	145.439983197989	48.4040979980632	28.3566999202527	22.7084913901149	3.16150724057395	27.1366915041957	19.4668980903356	90.8693533796811	-2.22759	0.00232412111165604	0.201184	CD300H	17	74560701	74567343	-	606	polymorphic_pseudogene	CD300H molecule (gene/pseudogene) [Source:HGNC Symbol;Acc:HGNC:52292]
ENSG00000160710	4295.84444855458	4424.53008819123	5187.90155153504	4920.91709681742	4866.55355328953	5237.4697573356	4852.76105404914	4596.92778011787	8785.48232264621	6761.22779033508	5222.60049024936	6384.6882164194	7267.70457054937	4943.54348851081	5428.84589481159	4797.8631662363	6399.15611050312	-0.415598	0.00233626640598868	0.201503	ADAR	1	154582057	154628013	-	9691	protein_coding	adenosine deaminase, RNA specific [Source:HGNC Symbol;Acc:HGNC:225]
ENSG00000215256	272.335547391518	380.245776809957	437.75464426218	356.354367096686	470.850580595672	290.527664536796	249.887886444997	323.883934916076	302.643410331189	141.111412269477	201.683741658596	220.650571254467	294.22306235888	210.767149371597	220.108719978476	347.730050256735	227.312581031812	0.61232	0.00234857952646477	0.201834	DHRS4-AS1	14	23938731	23988839	-	3593	antisense	DHRS4 antisense RNA 1 [Source:HGNC Symbol;Acc:HGNC:23175]
ENSG00000124201	1541.72681978454	1528.31118430897	1567.77244689246	1547.4758539671	1764.86651188308	1582.84431868066	1337.87712043186	1855.72984168653	2278.20782937356	2623.97969686372	1535.82169273021	2763.00594847963	2371.55636169808	1822.08200631746	1783.48366941464	1590.8255122044	2168.30531498247	-0.447649	0.00237314386703781	0.203211	ZNFX1	20	49237946	49278426	-	9340	protein_coding	zinc finger NFX1-type containing 1 [Source:HGNC Symbol;Acc:HGNC:29271]
ENSG00000211779	0	0	4.07213622569469	1.40296994919955	0	0	0	2.78011961301353	45.8817998169733	7.79142767132083	0	5.31688123504739	1.97465142522738	9.48452172172186	12.0607517796425	1.03190322348847	11.7871476642762	-3.47235	0.00240368482101751	0.205089	TRAV5	14	21749178	21749705	+	352	TR_V_gene	T cell receptor alpha variable 5 [Source:HGNC Symbol;Acc:HGNC:12143]
ENSG00000092098	253.335392922343	211.700004219676	336.629927990761	246.221226084521	309.510171860092	141.720811969169	156.308472179587	257.161064203752	786.166993017754	275.297111053336	447.737906482084	358.003336493191	424.550056423887	298.23551636081	318.102328188071	239.073383928738	415.441892574162	-0.798663	0.00244037142788083	0.207199	RNF31	14	24146683	24160661	+	4982	protein_coding	ring finger protein 31 [Source:HGNC Symbol;Acc:HGNC:16031]
ENSG00000127318	0	1.62846157092059	0	0	0	0	0	0	10.5881076500708	0	0	5.31688123504739	5.92395427568214	4.21534298743194	18.0911276694638	0.203557696365073	6.30505911681371	-4.42348	0.00244582958369703	0.207199	IL22	12	68248242	68253604	-	1173	protein_coding	interleukin 22 [Source:HGNC Symbol;Acc:HGNC:14900]
ENSG00000122482	1340.86804396754	1411.06195120269	912.158514555612	907.02007215751	968.042452413479	1032.79041722532	1044.79873509513	1160.69993843315	817.048973663794	589.551360463276	806.734966634386	771.833925954379	828.366272882886	934.752307463032	915.109541280376	1097.1800156313	809.056764048875	0.440316	0.00249369576839256	0.210505	ZNF644	1	90915298	91022272	-	7604	protein_coding	zinc finger protein 644 [Source:HGNC Symbol;Acc:HGNC:29222]
ENSG00000243710	0	9.77076942552352	2.71475748379646	2.8059398983991	3.29266140276694	3.54302029922922	12.3401425404937	0	0	0	0	0	0	0	1.50759397245531	4.30841138127612	0.215370567493616	4.12977	0.00252507386131042	0.212401	CFAP57	1	43172149	43254358	+	5764	protein_coding	cilia and flagella associated protein 57 [Source:HGNC Symbol;Acc:HGNC:26485]
ENSG00000211677	1505.53604936706	438.056162577638	6254.80124266705	26214.4935007936	10844.3803300129	1867.1716976938	2904.04687786284	492.081171503395	3643.19137392851	445.842805636692	1280.69175953209	398.766092628554	111.567805525347	35.8304153931715	143.221427383255	6315.07087905979	865.587382861089	2.86694	0.0025638661583393	0.214904	IGLC2	22	22900976	22901437	+	462	IG_C_gene	immunoglobulin lambda constant 2 [Source:HGNC Symbol;Acc:HGNC:5856]
ENSG00000231340	0	0	1.35737874189823	0.701484974599775	0	0	0	0	13.2351345625885	3.46285674280926	8.06734966634386	0	1.97465142522738	4.21534298743194	3.01518794491063	0.257357964562251	4.85293190418736	-3.7255	0.00257939088962274	0.214982	ACTG1P10	X	53142832	53143913	-	1082	processed_pseudogene	actin gamma 1 pseudogene 10 [Source:HGNC Symbol;Acc:HGNC:155]
ENSG00000166848	1628.58466878649	1549.48118473094	1907.79582173796	1559.4010985353	1494.86827685619	1602.33093032642	1461.27854583679	1752.86541600503	2839.37753482731	2132.2540393848	1647.75616935073	2248.15461555254	1997.35991661749	2191.97835346461	1772.93051160745	1619.57574285189	2118.54444868642	-0.387667	0.00258714642034157	0.214982	TERF2IP	16	75647786	75761872	+	3379	protein_coding	TERF2 interacting protein [Source:HGNC Symbol;Acc:HGNC:19246]
ENSG00000185761	19.0001544691757	47.225385556697	38.6852941440996	33.6712787807892	6.58532280553387	39.8589783663288	54.5022962205137	56.9924520667774	101.469364979845	132.454270412454	43.3620044565982	73.5501904181555	53.3155884811392	76.9300095206329	72.3645106778551	37.0651453012394	79.0637055638114	-1.08916	0.00261316672360137	0.214982	ADAMTSL5	19	1505018	1513604	-	3625	protein_coding	ADAMTS like 5 [Source:HGNC Symbol;Acc:HGNC:27912]
ENSG00000259719	2.71430778131081	0	0	0.701484974599775	0	0	0	0	69.7050420296325	0.865714185702315	0	0.886146872507898	5.92395427568214	0	12.0607517796425	0.426974094488824	12.7773727347382	-4.73033	0.00261491628670482	0.214982	LINC02284	14	56310880	56345001	+	846	lincRNA	long intergenic non-protein coding RNA 2284 [Source:HGNC Symbol;Acc:HGNC:53201]
ENSG00000167716	1313.72496615443	1160.27886928092	1370.27383994626	1411.38776889475	992.737412934231	1332.17563251019	1355.35898903089	1442.88207915402	2242.91413720666	2146.10546635604	1488.42601344044	2200.30268443711	2084.2445793275	1784.14391943057	1047.77781085644	1297.35244473821	1856.27351586497	-0.517099	0.00263204972974712	0.214982	WDR81	17	1716523	1738599	+	7913	protein_coding	WD repeat domain 81 [Source:HGNC Symbol;Acc:HGNC:26600]
ENSG00000159322	2269.16130517584	2321.3719693473	2108.00918616795	2102.35046887553	1993.70647937538	1805.16884245729	2516.360733049	2243.55652770192	3803.77767328792	3146.00535084221	2224.57167049432	3063.4097382598	3107.11401759528	2787.39555043937	2179.98088417038	2169.96068901878	2901.7506978699	-0.419598	0.00263211777931159	0.214982	ADPGK	15	72751369	72785846	-	5931	protein_coding	ADP dependent glucokinase [Source:HGNC Symbol;Acc:HGNC:25250]
ENSG00000163659	395.384166810942	460.854624570526	615.571259450848	490.337997245243	368.778077109897	227.639054225478	234.46270826938	315.543576077036	1464.68822492646	643.22563997682	794.63394213487	880.82999127285	606.217987544806	416.265120008904	364.837741334186	388.571432969919	738.671235314127	-0.926393	0.00263543085515695	0.214982	TIPARP	3	156673235	156706770	+	5048	protein_coding	TCDD inducible poly(ADP-ribose) polymerase [Source:HGNC Symbol;Acc:HGNC:23696]
ENSG00000157087	28.952616333982	42.3400008439353	26.4688854670155	20.3430642633935	51.0362517428875	4.42877537403653	54.5022962205137	9.73041864554736	6.17639612920794	5.19428511421389	8.06734966634386	19.4952311951738	0	1.05383574685798	13.5683457520978	29.7252886114139	7.65077765769932	1.96219	0.00264154013290747	0.214982	ATP2B2	3	10324023	10708007	-	10331	protein_coding	ATPase plasma membrane Ca2+ transporting 2 [Source:HGNC Symbol;Acc:HGNC:815]
ENSG00000127528	1585.15574428551	1772.58041994706	2834.88550245446	2927.29679900486	2785.59154674083	1440.23775163668	2348.74046354063	1253.8339454691	12571.6131498507	3762.39385106226	6788.67474422836	2704.5202548941	1932.19641958499	2732.59609160275	2431.74907757042	2118.54027163489	4703.39194125622	-1.15067	0.00264607578774058	0.214982	KLF2	19	16324817	16327874	+	2018	protein_coding	Kruppel like factor 2 [Source:HGNC Symbol;Acc:HGNC:6347]
ENSG00000244482	163.763236139086	371.289238169894	179.852683301516	236.400436440124	271.644565728272	131.977506146289	473.038797385591	176.537595426359	946.753292377161	957.47988938676	400.342227192314	511.306745437057	636.82508463583	166.506048003562	257.798569289859	250.563007342141	553.858836617506	-1.14523	0.00265879299294843	0.215281	LILRA6	19	54236592	54242791	-	2718	protein_coding	leukocyte immunoglobulin like receptor A6 [Source:HGNC Symbol;Acc:HGNC:15495]
ENSG00000130600	805.244641788874	375.360392097195	334.593859877914	1932.59110502238	278.229888533806	7249.01953222299	1391.35107144066	318.323695690049	0	245.862828739457	507.23461027137	46.9657842429186	309.032948048085	285.589487398514	203.525186281467	1585.58927333423	228.315834997402	2.79607	0.00267610207535747	0.215948	H19	11	1995176	2001470	-	2897	processed_transcript	H19, imprinted maternally expressed transcript [Source:HGNC Symbol;Acc:HGNC:4713]
ENSG00000121211	168.28708244127	128.648464102726	95.0165119328762	116.446505783563	181.096377152182	128.434485847059	146.025020062508	159.856877748278	32.6466652543848	64.0628497419713	124.035501120037	46.0796373704107	62.2015198946624	67.445487798911	138.698645465889	140.476415633808	76.4529009494666	0.8835	0.0026984274112777	0.216927	MND1	4	153344649	153415118	+	1511	protein_coding	meiotic nuclear divisions 1 [Source:HGNC Symbol;Acc:HGNC:24839]
ENSG00000244134	0	0	2.03606811284735	2.10445492379933	0	0.885755074807306	0	1.39005980650677	8.82342304172563	4.32857092851157	6.05051224975789	4.43073436253949	10.8605828387506	0	9.04556383473189	0.802042239745093	6.21991246514529	-2.84535	0.00270646650933525	0.216927	RPS12P20	11	72708186	72708565	+	380	processed_pseudogene	ribosomal protein S12 pseudogene 20 [Source:HGNC Symbol;Acc:HGNC:36187]
ENSG00000273218	43.428924500973	44.7826932003161	12.2164086770841	17.5371243649944	6.58532280553387	41.6304885159434	53.4739510088059	15.2906578715744	1.76468460834513	18.1799978997486	8.06734966634386	13.2922030876185	8.88593141352321	1.05383574685798	12.0607517796425	29.3681963681531	9.04353631458283	1.70556	0.00274387255373098	0.218609	AC005776.2	19	15346068	15348417	-	1769	lincRNA	novel transcript
ENSG00000259590	28.0478470735451	356.633084031608	52.937770934031	56.118797967982	29.6339526249024	24.8011420946046	327.013777323082	15.2906578715744	4.41171152086282	29.4342823138787	16.1346993326877	7.08917498006318	56.2775656189803	15.8075362028698	51.2581950634807	111.309628740166	25.7733092904033	2.11731	0.00276130185912915	0.218609	LINC02244	15	99395179	99396593	-	323	lincRNA	long intergenic non-protein coding RNA 2244 [Source:HGNC Symbol;Acc:HGNC:53929]
ENSG00000077157	962.674493104902	1381.74964292612	1318.69344775413	1391.74618960595	1099.74890852416	1036.33343752455	830.902931059907	1905.77199472078	548.816913195334	1185.16272022647	1129.42895328814	500.672982966962	594.370078993441	368.842511400295	630.174280486321	1240.95263065256	708.209777222423	0.808868	0.00276775967671989	0.218609	PPP1R12B	1	202348699	202592706	+	21069	protein_coding	protein phosphatase 1 regulatory subunit 12B [Source:HGNC Symbol;Acc:HGNC:7619]
ENSG00000262202	1.80953852087388	0	0	2.10445492379933	0	0	4.11338084683122	2.78011961301353	53.8228805545264	6.92571348561852	15.1262806243947	5.31688123504739	0.98732571261369	7.37685022800589	0	1.35093673806474	12.7937045486009	-3.26831	0.00278683550769734	0.218609	AC007952.4	17	19112000	19112636	-	637	lincRNA	novel transcript
ENSG00000273156	140.239235367725	39.0830777020941	20.3606811284735	49.8054331965841	87.2555271733238	75.289181358621	12.3401425404937	30.5813157431488	21.1762153001415	28.5685681281764	17.1431180409807	12.4060562151106	27.6451199531833	16.8613719497278	30.1518794491063	56.869324276308	21.9931898623466	1.37249	0.00278805411626789	0.218609	AC124016.2	4	82344876	82345540	-	665	lincRNA	novel transcript
ENSG00000214846	0	0	1.35737874189823	1.40296994919955	0	0	0	0	53.8228805545264	6.92571348561852	0	9.74761559758688	9.8732571261369	0	0	0.345043586387223	11.4813523948384	-4.72647	0.00279908796790394	0.218609	AC114744.1	4	15730962	15731627	-	666	processed_pseudogene	ribosomal protein L10a (RPL10A) pseudogene
ENSG00000279833	15.3810774274279	17.9130772801265	21.0393704994226	18.2386093395942	41.1582675345867	8.85755074807306	20.5669042341561	8.34035883904059	197.644676134654	9.52285604272546	4.03367483317193	4.43073436253949	5.92395427568214	2.10767149371597	12.0607517796425	18.9369019878035	33.6749027031617	1.39001	0.00280075257501135	0.218609	AL031846.2	22	39133090	39136760	+	3671	antisense	novel transcript, antisense to CBX7
ENSG00000170324	5.42861556262163	29.3123082765706	12.8950980480332	6.31336477139798	0	4.42877537403653	7.19841648195464	2.78011961301353	0	1.73142837140463	0	3.54458749003159	0	2.10767149371597	0	8.54458726595351	1.05481247930746	2.9856	0.00280091451785894	0.218609	FRMPD2	10	48153088	48274870	-	8791	protein_coding	FERM and PDZ domain containing 2 [Source:HGNC Symbol;Acc:HGNC:28572]
ENSG00000145649	117.620003856802	27.68384670565	144.560836012162	284.101414712909	265.059242922738	111.605139425721	170.705305143496	88.963827616433	2956.72906128226	305.597107552917	435.636881982568	68.2333091831081	202.401771085806	83.2530240017808	194.479622446736	151.287452049489	606.618682505025	-2.0042	0.00282154869585019	0.219236	GZMA	5	55102648	55110252	+	894	protein_coding	granzyme A [Source:HGNC Symbol;Acc:HGNC:4708]
ENSG00000092295	212.62077620268	87.9369248297117	27.1475748379646	41.3876135013867	32.9266140276694	35.4302029922922	51.4172605853903	15.2906578715744	73.2344112463228	47.6142802136273	38.3199109151333	60.257987330537	42.4550056423887	574.340482037602	1216.62833577144	63.0197031060837	293.264344736721	-2.2153	0.00283383239374006	0.219236	TGM1	14	24249114	24264432	-	3735	protein_coding	transglutaminase 1 [Source:HGNC Symbol;Acc:HGNC:11777]
ENSG00000255529	977.150801271893	889.954248508101	1026.17832887506	946.303230735097	856.091964719403	1141.73829142662	881.29184643359	1120.38820404445	678.521231908701	599.074216506002	813.793897592437	848.042556990058	718.773118782766	791.430645890346	901.541195528278	979.887114501777	764.453837599798	0.359688	0.0028391543499424	0.219236	POLR2M	15	57706629	57782762	+	6574	protein_coding	RNA polymerase II subunit M [Source:HGNC Symbol;Acc:HGNC:14862]
ENSG00000101307	199.954006556563	177.502311230344	82.121413884843	157.834119284949	69.1458894581057	70.8604059845845	159.39350781471	169.587296393825	882.342304172563	814.637048745878	214.793184866405	280.908558585004	132.301645490234	74.8223380269169	161.312555052719	135.799868825991	365.873947848531	-1.43015	0.00284578650113084	0.219236	SIRPB1	20	1563521	1620061	-	6091	protein_coding	signal regulatory protein beta 1 [Source:HGNC Symbol;Acc:HGNC:15928]
ENSG00000133063	237.049546234478	23577.6808545737	3311.32544086074	2409.60088775023	2375.65520209634	882.212054508077	9434.03897220741	578.264879506814	38.8230613835928	3100.12249899999	184.540623617616	61.1441342030449	851.074764273	529.025544922708	499.013604882709	5350.72847971723	751.963461754666	2.83094	0.00285595004929848	0.219309	CHIT1	1	203212827	203273641	-	7730	protein_coding	chitinase 1 [Source:HGNC Symbol;Acc:HGNC:1936]
ENSG00000260792	0	0	0	0	0	0	0	0	24.7055845168318	15.5828553426417	0	5.31688123504739	0	0	9.04556383473189	0	7.80726927560753	-5.46562	0.00287820206695973	0.220307	LINC02280	14	104661120	104665558	-	3816	lincRNA	long intergenic non-protein coding RNA 2280 [Source:HGNC Symbol;Acc:HGNC:53196]
ENSG00000236438	48.8575400635946	68.3953859786646	42.7574303697943	65.9395876123789	90.5481885760908	16.8293464213388	127.514806251768	68.1129305188315	284.114221943565	296.939965695894	80.6734966634386	410.286001971157	85.897336997391	67.445487798911	43.7202252012041	66.1194019740577	181.296676610223	-1.46017	0.00292826399428134	0.223421	FAM157A	3	198153287	198222513	+	7091	transcribed_unprocessed_pseudogene	family with sequence similarity 157 member A [Source:HGNC Symbol;Acc:HGNC:34079]
ENSG00000145781	533.813863657793	531.692702905572	465.580908471093	535.233035619629	515.301509533026	443.76329247846	401.054632566044	472.6203342123	348.525210148163	307.328535924322	459.8389309816	426.236645676299	335.690742288654	356.196482437999	410.065560507846	487.38253493049	377.697443994983	0.369196	0.00295575699530374	0.224798	COMMD10	5	116084991	116412762	+	2464	protein_coding	COMM domain containing 10 [Source:HGNC Symbol;Acc:HGNC:30201]
ENSG00000171608	1193.39065451632	994.990019832478	1195.85067161234	1343.34372635857	1672.6719926056	795.408057176961	1629.92716055687	998.062941071858	10284.5818974354	2924.38251930242	1006.4018708764	2769.20897658718	1565.89858020531	1125.49657764433	1399.04720643853	1227.95565296638	3010.71680406994	-1.29406	0.00298666064034621	0.226425	PIK3CD	1	9651732	9729114	+	6332	protein_coding	phosphatidylinositol-4,5-bisphosphate 3-kinase catalytic subunit delta [Source:HGNC Symbol;Acc:HGNC:8977]
ENSG00000260804	196.334929514815	227.170389143422	290.479050766222	225.878161821128	228.839967492302	294.956439910833	411.338084683122	244.650525945191	185.291883876238	161.022838540631	184.540623617616	163.937171413961	165.8707197191	220.251671093319	211.063156143744	264.955943659629	184.568294914944	0.524358	0.00300405880436561	0.226773	LINC01963	2	216217045	216220192	+	3148	lincRNA	long intergenic non-protein coding RNA 1963 [Source:HGNC Symbol;Acc:HGNC:25283]
ENSG00000174292	26.2383085526712	47.225385556697	65.1541796111151	86.2826518757724	67.4995587567222	31.0014276182557	12.3401425404937	12.5105382585609	157.939272446889	217.294260611281	43.3620044565982	163.937171413961	55.2902399063666	85.3606954954968	69.3493227329445	43.531524096286	113.218995294791	-1.37731	0.00301029940492759	0.226773	TNK1	17	7380534	7389774	+	3860	protein_coding	tyrosine kinase non receptor 1 [Source:HGNC Symbol;Acc:HGNC:11940]
ENSG00000126861	1.80953852087388	4.88538471276176	7.46558308044027	11.2237595935964	0	8.85755074807306	0	0	65.2933305087697	16.448569528344	10.0841870829298	27.4705530477448	23.6958171027286	3.16150724057395	10.5531578071872	4.28022708196817	22.386731759754	-2.33161	0.00302852362104586	0.227426	OMG	17	31272013	31297539	-	3837	protein_coding	oligodendrocyte myelin glycoprotein [Source:HGNC Symbol;Acc:HGNC:8135]
ENSG00000136895	76.0006178767028	113.178079178981	58.367285901624	56.8202829425818	36.2192754304363	104.519098827262	85.3526525717479	50.0421530342436	20.293872995969	65.7942781133759	31.2609799570824	28.3566999202527	45.4169827802297	16.8613719497278	3.01518794491063	72.5624307204474	30.1427676659355	1.25923	0.00304765228294754	0.228143	GARNL3	9	127224265	127393660	+	9695	protein_coding	GTPase activating Rap/RanGAP domain like 3 [Source:HGNC Symbol;Acc:HGNC:25425]
ENSG00000101310	954.531569760969	966.491942341368	1011.92585208513	1002.42202870308	948.286483996878	705.946794621423	755.833730605238	1053.66533333213	1159.39778768275	1255.28556926836	1062.8733185408	1524.17262071358	1219.34725507791	1150.78863556892	1047.77781085644	924.887966930777	1202.80614252982	-0.379796	0.00307594145462861	0.228573	SEC23B	20	18507482	18561415	+	4385	protein_coding	Sec23 homolog B, coat complex II component [Source:HGNC Symbol;Acc:HGNC:10702]
ENSG00000261416	6.33338482305856	1.62846157092059	4.07213622569469	5.6118797967982	0	2.65726522442192	9.25510690537025	0	122.645580279986	7.79142767132083	14.1178619161018	11.5199093426027	4.93662856306845	0	15.0759397245531	3.69477931828303	25.1553353568047	-2.74091	0.00308497316808335	0.228573	AC012645.3	16	30183505	30184957	-	811	antisense	novel transcript, antisense to CORO1A
ENSG00000138646	82.3340026997613	141.676156670091	95.6952013038253	108.028686088365	230.486298193686	84.1467321066941	143.968329639093	118.155083553075	367.936740839959	244.131400368053	76.6398218302667	178.115521374087	424.550056423887	118.029603648094	465.846537488692	125.561311281824	267.892811710434	-1.09614	0.00309138193105561	0.228573	HERC5	4	88457117	88506163	+	4766	protein_coding	HECT and RLD domain containing E3 ubiquitin protein ligase 5 [Source:HGNC Symbol;Acc:HGNC:24368]
ENSG00000135378	66.0481560118964	50.4823086985382	27.1475748379646	54.0143430441827	83.9628657705569	25.6868971694119	100.777830747365	22.2409569041082	251.467556689181	102.154273912873	48.4040979980632	42.5350498803791	43.4423313550023	127.514125369816	517.104732552173	53.795116648003	161.803166822498	-1.5881	0.00309937388120279	0.228573	PRRG4	11	32829943	32858123	+	5530	protein_coding	proline rich and Gla domain 4 [Source:HGNC Symbol;Acc:HGNC:30799]
ENSG00000140287	83.2387719601982	75.7234630478073	26.4688854670155	56.8202829425818	46.0972596387371	54.916814638053	46.2755345268513	169.587296393825	296.467014201981	15.5828553426417	43.3620044565982	19.4952311951738	14.8098856892053	31.6150724057395	0	69.8910385768837	60.1902947559057	1.52199	0.00313075253806224	0.228573	HDC	15	50241947	50266026	-	3956	protein_coding	histidine decarboxylase [Source:HGNC Symbol;Acc:HGNC:4855]
ENSG00000131042	1111.961421077	924.151941497433	619.643395676543	1125.18189925804	1002.61539714253	462.364149049414	1271.03468167085	711.710620931464	6546.09755465625	1989.41119874392	1040.68810695836	2493.61729923722	1417.79972331326	810.39968933379	713.091948971364	903.582938287909	2144.44364588774	-1.2471	0.00313531374982951	0.228573	LILRB2	19	54273821	54281184	-	3810	protein_coding	leukocyte immunoglobulin like receptor B2 [Source:HGNC Symbol;Acc:HGNC:6606]
ENSG00000109255	20.8096929900496	1.62846157092059	102.482095013316	96.804926494769	69.1458894581057	100.976078528033	153.223436544463	2.78011961301353	5.29405382503538	19.9114262711532	29.2441425404965	19.4952311951738	1.97465142522738	18.9690434434437	15.0759397245531	68.4813375265839	15.7092126321547	2.12566	0.00313630185591201	0.228573	NMU	4	55595229	55636698	-	975	protein_coding	neuromedin U [Source:HGNC Symbol;Acc:HGNC:7859]
ENSG00000186409	30.7621548548559	36.6403853457132	32.5770898055576	50.5069181711838	74.0848815622561	39.8589783663288	47.3038797385591	25.0210765171218	59.9992766837343	88.3028469416361	59.496703789286	220.650571254467	58.2522170442077	52.6917873428992	67.8417287604892	42.094420545197	86.747875973817	-1.05312	0.00313965801310653	0.228573	CCDC30	1	42463330	42654664	+	13504	protein_coding	coiled-coil domain containing 30 [Source:HGNC Symbol;Acc:HGNC:26103]
ENSG00000256597	19.9049237296126	16.2846157092059	4.07213622569469	9.82078964439686	23.0486298193686	33.6586928426776	35.9920824097732	19.4608372910947	0	45.0171376565204	2.01683741658596	46.0796373704107	104.656525537051	429.964984718058	141.7138334108	20.280338458978	109.921279444204	-2.44082	0.00314212139067327	0.228573	LINC02393	12	127881617	127898639	+	2311	lincRNA	long intergenic non-protein coding RNA 2393 [Source:HGNC Symbol;Acc:HGNC:53320]
ENSG00000263826	0	0	3.39344685474558	1.40296994919955	0	8.85755074807306	15.4251781756171	5.56023922602706	123.527922584159	5.19428511421389	36.3030734985474	16.8367905776501	2.96197713784107	4.21534298743194	24.121503559285	4.32992311920779	30.4515564941612	-2.81631	0.00315257477877795	0.228573	AC112907.3	3	186781780	186784179	-	2400	antisense	novel transcript, antisense to eukaryotic translation initiation factor 4A, isoform 2 EIF4A2
ENSG00000010932	218.954161025739	437.241931792177	44.7934984826416	303.041509027103	543.289131456545	2969.9367658289	1413.97466609823	532.392905892091	2.64702691251769	289.148538024573	275.298307363984	29.2428467927606	280.400502382288	226.574685574467	159.804961080263	807.953071200428	180.445266875836	2.1628	0.00315902730937008	0.228573	FMO1	1	171248471	171285978	+	3602	protein_coding	flavin containing monooxygenase 1 [Source:HGNC Symbol;Acc:HGNC:3769]
ENSG00000196867	190.906313952194	184.016157514026	146.596904125009	162.043029132548	146.523432423129	196.637626607222	127.514806251768	115.374963940062	137.64539945092	112.542844141301	133.111269494674	118.743680916058	69.1127998829583	76.9300095206329	64.8265408155785	158.701654243245	101.844649174589	0.63686	0.00319786989532705	0.230194	ZFP28	19	56538948	56556810	+	6974	protein_coding	ZFP28 zinc finger protein [Source:HGNC Symbol;Acc:HGNC:17801]
ENSG00000165443	7.2381540834955	0.814230785460293	8.8229618223385	10.5222746189966	18.1096377152182	15.9435913465315	92.5510690537025	15.2906578715744	0	1.73142837140463	9.07576837463684	1.7722937450158	4.93662856306845	2.10767149371597	9.04556383473189	21.1615721621647	4.09562205465337	2.39816	0.0032007686919851	0.230194	PHYHIPL	10	59176590	59247774	+	4093	protein_coding	phytanoyl-CoA 2-hydroxylase interacting protein like [Source:HGNC Symbol;Acc:HGNC:29378]
ENSG00000004468	46.1432322822838	54.5534626258397	89.5869969652833	132.580660199358	16.4633070138347	38.0874682167142	61.7007127024684	48.6520932277368	1108.22193404074	49.3457085850319	169.414342993221	78.8670716532029	107.618502674892	31.6150724057395	66.3341347880338	60.9709916541898	230.202395305837	-1.91379	0.00321425416480558	0.230468	CD38	4	15778275	15853230	+	6855	protein_coding	CD38 molecule [Source:HGNC Symbol;Acc:HGNC:1667]
ENSG00000223804	32.5716933757298	42.3400008439353	16.9672342737279	22.4475191871928	27.987621923519	51.3737943388238	25.7086302926952	34.7514951626691	138.527741755092	59.7342788134597	65.5472160390438	94.8177153583451	74.0494284460267	12.6460289622958	49.7506010910254	31.7684986747866	70.7247157807556	-1.15942	0.00325024320185557	0.231682	AC244669.1	1	120267334	120341871	-	1107	transcribed_unprocessed_pseudogene	Poly [ADP-ribose] polymerase 8 (PARP8) pseudogene
ENSG00000237073	0	0	2.03606811284735	0.701484974599775	1.64633070138347	0	0	0	9.7057653458982	3.46285674280926	5.04209354146491	1.7722937450158	0.98732571261369	8.43068597486388	3.01518794491063	0.547985473603824	4.63088700108234	-3.06729	0.00325065529459409	0.231682	AL162727.2	9	113570190	113590019	-	395	antisense	novel transcript
ENSG00000112297	696.672330536442	824.815785671277	943.378225619271	1082.39131580745	1267.67464006527	743.14850776333	744.521933276452	988.33252242631	2019.681534251	938.434177301309	1006.4018708764	1129.83726244757	1409.90111761235	1467.99319537317	1631.21667819665	911.366907645726	1371.92369086549	-0.590622	0.00327150906160399	0.232472	CRYBG1	6	106360808	106571978	+	10374	protein_coding	crystallin beta-gamma domain containing 1 [Source:HGNC Symbol;Acc:HGNC:356]
ENSG00000272797	10.8572311252433	0	2.71475748379646	3.50742487299888	0	14.1720811969169	12.3401425404937	0	0	0	0	0	0	0	0	5.44895465243115	0	4.88113	0.00331211558721445	0.233771	AC092954.1	3	168927475	168927919	+	445	lincRNA	novel transcript
ENSG00000205293	0	0	2.71475748379646	2.8059398983991	3.29266140276694	0	4.11338084683122	6.95029903253383	0	25.1057113853671	2.01683741658596	60.257987330537	25.6704685279559	4.21534298743194	12.0607517796425	2.48462983304094	18.4752999182172	-2.94241	0.00332209008449709	0.233771	LINC01602	8	57855500	57984126	+	2435	lincRNA	long intergenic non-protein coding RNA 1602 [Source:HGNC Symbol;Acc:HGNC:51634]
ENSG00000184221	16.2858466878649	21.9842312074279	18.3246130156261	15.4326694411951	6.58532280553387	3.54302029922922	14.3968329639093	6.95029903253383	385.58358692341	57.1371362563528	29.2441425404965	33.6735811553001	6.91127998829583	0	6.03037588982126	12.937854431665	74.0828718219538	-2.51185	0.00332551565956887	0.233771	OLIG1	21	33070144	33072420	+	2277	protein_coding	oligodendrocyte transcription factor 1 [Source:HGNC Symbol;Acc:HGNC:16983]
ENSG00000254996	10.8572311252433	6.51384628368235	10.1803405642367	7.71633472059753	0	21.2581217953753	27.7653207161108	15.2906578715744	136.763057146747	36.3599957994972	23.1936302907386	10.6337624700948	26.6577942405696	24.2382221777336	33.1670673940169	12.4477316346025	41.573361359914	-1.73605	0.00333622880454126	0.233771	ANKHD1-EIF4EBP3	5	140401908	140549569	+	11385	protein_coding	ANKHD1-EIF4EBP3 readthrough [Source:HGNC Symbol;Acc:HGNC:33530]
ENSG00000125245	12.6667696461171	19.541538851047	21.7180598703717	33.6712787807892	6.58532280553387	6.20028552365114	6.17007127024684	15.2906578715744	230.291341389039	17.3142837140463	46.3872605814772	28.3566999202527	24.6831428153422	6.32301448114791	37.6898493113829	15.2304980774164	55.863656030384	-1.86404	0.00336805661501579	0.233771	GPR18	13	99254714	99261744	-	1908	protein_coding	G protein-coupled receptor 18 [Source:HGNC Symbol;Acc:HGNC:4472]
ENSG00000183597	156.52508205559	213.328465790597	234.826522348394	230.087071668726	202.498676270167	176.265259886654	177.90372162545	195.998432717454	405.877459919379	274.431396867634	225.885790657628	307.492964760241	298.172365209334	193.905777421869	268.351727097046	198.429154045379	282.016783133304	-0.507133	0.00338038263713823	0.233771	TANGO2	22	20017014	20065926	+	6157	protein_coding	transport and golgi organization 2 homolog [Source:HGNC Symbol;Acc:HGNC:25439]
ENSG00000275993	417.098629061428	376.174622882656	35.291847289354	39.2831585775874	169.572062242497	162.093178689737	167.620269508372	360.025489885252	674.109520387838	618.119928591453	1925.0713141313	587.515376472736	252.755382429105	318.258395551111	203.525186281467	215.894907267111	654.193586263573	-1.60026	0.00338416005309021	0.233771	SIK1B	21	6111134	6123739	+	4806	protein_coding	salt inducible kinase 1B (putative) [Source:HGNC Symbol;Acc:HGNC:52389]
ENSG00000167703	1322.7726587588	1380.1211813552	1238.60810198214	1280.21007864459	1588.70912683505	1151.4815972495	2004.24481761851	1276.07490237321	2805.84852726875	4770.95087740546	1041.69652566665	3015.55780714438	2864.23189229231	2001.23408328331	1172.90811057023	1405.27780810212	2524.63254623301	-0.845594	0.0033884268666401	0.233771	SLC43A2	17	1569267	1628886	-	10606	protein_coding	solute carrier family 43 member 2 [Source:HGNC Symbol;Acc:HGNC:23087]
ENSG00000155749	14.476308166991	8.14230785460293	6.78689370949116	8.4178196951973	0	16.8293464213388	6.17007127024684	9.73041864554736	32.6466652543848	8.65714185702315	20.1683741658596	21.2675249401895	16.7845371144327	18.9690434434437	42.2126312287488	8.81914572042693	22.9579882862975	-1.34089	0.00339250621927247	0.233771	ALS2CR12	2	201288271	201357398	-	2635	protein_coding	amyotrophic lateral sclerosis 2 chromosome region 12 [Source:HGNC Symbol;Acc:HGNC:14439]
ENSG00000109971	18935.9158516847	18638.5569099716	22926.1269506611	19863.2485407672	17602.567859192	17190.7344918602	15915.6988416017	22888.7247739404	17708.6100447433	28255.1795929522	26819.9039657602	27611.4504004736	28195.0603751091	27580.9891667672	21826.945533208	19245.1967774599	25428.3055827162	-0.40194	0.00339683075614473	0.233771	HSPA8	11	123057489	123063230	-	4849	protein_coding	heat shock protein family A (Hsp70) member 8 [Source:HGNC Symbol;Acc:HGNC:5241]
ENSG00000077420	614.338327836681	662.783859364679	812.391177026092	766.021592262955	1119.50487694076	575.740798624749	857.63990656431	750.632295513653	3725.24920821656	2066.45976127143	653.455322973853	1385.93370860235	1156.15840947063	785.107631409199	887.97284977618	769.881604266735	1522.90527024574	-0.984813	0.00339781077970678	0.233771	APBB1IP	10	26438203	26567803	+	3981	protein_coding	amyloid beta precursor protein binding family B member 1 interacting protein [Source:HGNC Symbol;Acc:HGNC:17379]
ENSG00000266126	0	0	0	0	0	0	0	0	3.52936921669025	1.73142837140463	6.05051224975789	0.886146872507898	5.92395427568214	4.21534298743194	0	0	3.19096485335354	-4.18066	0.0034045007019879	1	AC005730.3	17	19929372	19929737	-	366	sense_intronic	novel transcript
ENSG00000138449	420.717706103176	731.179245343343	418.751341875604	867.035428605322	735.90982351841	1944.23238920204	1242.24101574303	586.605238345855	3839.953707759	295.208537324489	466.897861939651	217.992130636943	617.078570383556	269.781951195644	520.119920497084	868.334023592097	889.576097105195	1.02748	0.00341024761026355	0.233951	SLC40A1	2	189560579	189583758	-	4330	protein_coding	solute carrier family 40 member 1 [Source:HGNC Symbol;Acc:HGNC:10909]
ENSG00000115718	10.8572311252433	82.2373093314896	35.9705366603031	14.7311844665953	9.87798420830081	10.6290608976877	41.1338084683122	27.8011961301353	5.29405382503538	6.92571348561852	4.03367483317193	4.43073436253949	7.89860570090952	20.0228791903017	18.0911276694638	29.1547889110084	9.5281127238629	1.64322	0.00343915442947761	0.235256	PROC	2	127418427	127429246	+	2495	protein_coding	protein C, inactivator of coagulation factors Va and VIIIa [Source:HGNC Symbol;Acc:HGNC:9451]
ENSG00000275056	0	0	0	2.8059398983991	3.29266140276694	0	0	0	124.410264888331	0	0	5.31688123504739	4.93662856306845	0	12.0607517796425	0.762325162645755	20.9606466380128	-4.89759	0.00345473090580342	0.235644	AC020663.3	16	4839244	4840334	-	1091	sense_intronic	novel transcript, sense intronic to GLYR1
ENSG00000112996	613.433558576244	472.25385556697	661.043447304439	603.277078155807	474.143241998439	552.711166679759	443.216786246064	581.044999119828	751.755643155024	664.868494619378	653.455322973853	684.991532448605	734.570330184585	726.092829585151	646.75781418333	550.140516705944	694.641709592846	-0.334849	0.00349604982193661	0.237663	MRPS30	5	44808925	44820428	+	6202	protein_coding	mitochondrial ribosomal protein S30 [Source:HGNC Symbol;Acc:HGNC:8769]
ENSG00000272305	1.80953852087388	13.841923352825	7.46558308044027	8.4178196951973	9.87798420830081	8.85755074807306	9.25510690537025	8.34035883904059	3.52936921669025	1.73142837140463	4.03367483317193	0	0.98732571261369	3.16150724057395	4.52278191736594	8.48323316876514	2.56658389883149	1.76991	0.00350430073399983	0.237663	AC096887.1	3	52969119	53099453	-	1760	protein_coding	novel transcript
ENSG00000143382	308.526317808996	367.218084242592	219.895356187513	303.742994001703	370.42440781128	201.066401981258	328.04212253479	305.813157431488	559.405020845405	538.47422350684	315.635055695703	607.896754540418	435.410639262637	341.442781981987	355.792177499454	300.591105249953	450.579521904635	-0.587254	0.00355263171930443	0.238309	ADAMTSL4	1	150549369	150560937	+	6432	protein_coding	ADAMTS like 4 [Source:HGNC Symbol;Acc:HGNC:19706]
ENSG00000197915	5.42861556262163	4.88538471276176	3.39344685474558	10.5222746189966	0	9.74330582288037	26.736975504403	5.56023922602706	1.76468460834513	10.3885702284278	2.01683741658596	8.86146872507898	9.8732571261369	95.8990529640766	242.722629565306	8.2837802878045	53.0752143762796	-2.66726	0.00356062283286622	0.238309	HRNR	1	152212082	152224193	-	9623	protein_coding	hornerin [Source:HGNC Symbol;Acc:HGNC:20846]
ENSG00000125962	227.097084369671	162.031926306598	266.046233412053	272.877655119313	273.290896429656	286.984644237567	276.6248619494	305.813157431488	201.174045351344	133.319984598156	206.725835200061	176.343227629072	207.338399648875	187.582762940721	192.97202847428	258.845807406968	186.493754834644	0.471933	0.003566126344109	0.238309	ARMCX5	X	102599168	102604159	+	4911	protein_coding	armadillo repeat containing X-linked 5 [Source:HGNC Symbol;Acc:HGNC:25772]
ENSG00000231327	0	0	4.07213622569469	0	1.64633070138347	8.85755074807306	0	5.56023922602706	13.2351345625885	22.5085688282602	16.1346993326877	5.31688123504739	15.797211401819	7.37685022800589	12.0607517796425	2.51703211264729	13.2042996240073	-2.40867	0.00357570840959079	0.238309	LINC01816	2	70124036	70125317	-	662	lincRNA	long intergenic non-protein coding RNA 1816 [Source:HGNC Symbol;Acc:HGNC:52621]
ENSG00000140675	0	0	1.35737874189823	0	0	0	0	0	14.117476866761	0	4.03367483317193	0.886146872507898	1.97465142522738	9.48452172172186	3.01518794491063	0.169672342737279	4.78737995204296	-4.0391	0.00357934379051289	0.238309	SLC5A2	16	31483002	31490860	+	4468	protein_coding	solute carrier family 5 member 2 [Source:HGNC Symbol;Acc:HGNC:11037]
ENSG00000260439	16.2858466878649	5.69961549822205	8.14427245138939	3.50742487299888	0	35.4302029922922	15.4251781756171	45.8719736147233	3.52936921669025	3.46285674280926	2.01683741658596	1.7722937450158	2.96197713784107	9.48452172172186	0	16.2955642866385	3.31826514009489	2.27469	0.00358254903534361	0.238309	LMF1-AS1	16	921033	934495	+	1448	antisense	LMF1 antisense RNA 1 [Source:HGNC Symbol;Acc:HGNC:50469]
ENSG00000171517	1.80953852087388	8.14230785460293	2.71475748379646	2.8059398983991	0	3.54302029922922	0	8.34035883904059	11.4704499542433	8.65714185702315	5.04209354146491	18.6090843226659	5.92395427568214	8.43068597486388	37.6898493113829	3.41949036199277	13.6890370339037	-1.97401	0.00358575390776053	0.238309	LPAR3	1	84811602	84893213	-	3543	protein_coding	lysophosphatidic acid receptor 3 [Source:HGNC Symbol;Acc:HGNC:14298]
ENSG00000113211	9.95246186480631	26.0553851347294	22.3967492413208	37.1787036537881	16.4633070138347	16.8293464213388	17.4818685990327	23.631016710615	0	4.32857092851157	19.1599554575667	4.43073436253949	10.8605828387506	5.26917873428992	0	21.2486048299332	6.2927174745226	1.74817	0.00359390611326771	0.238309	PCDHB6	5	141150022	141153287	+	3266	protein_coding	protocadherin beta 6 [Source:HGNC Symbol;Acc:HGNC:8691]
ENSG00000168916	256.95446996409	191.344234583169	340.023374845507	318.474178468298	144.877101721745	286.09888916276	219.037530093763	139.005980650677	44.1171152086282	86.5714185702315	241.012071282023	143.555793346279	115.517108375802	141.21399007897	104.023984099417	236.976969936251	125.144497280193	0.924209	0.00360984679307185	0.238701	ZNF608	5	124636913	124748807	-	6922	protein_coding	zinc finger protein 608 [Source:HGNC Symbol;Acc:HGNC:29238]
ENSG00000260257	545.575864043473	505.637317770842	299.980701959509	390.025645877475	350.668439394679	496.908596966899	437.046714975818	401.727284080455	307.055121852052	280.49139616755	342.862360819614	294.200761672622	301.134342347175	370.950182894011	321.117516132982	428.446320633644	316.830240269429	0.437052	0.00363698143796736	0.239829	AL035071.1	20	32856621	32858751	+	2131	lincRNA	novel transcript
ENSG00000213509	16.2858466878649	0	1.35737874189823	11.9252445681962	9.87798420830081	8.85755074807306	14.3968329639093	25.0210765171218	1.76468460834513	1.73142837140463	6.05051224975789	0	0	0	1.50759397245531	10.9652393044205	1.57917417170899	2.78893	0.00366025366481616	0.240358	PPIAP16	3	57941818	57942304	+	487	processed_pseudogene	peptidylprolyl isomerase A pseudogene 16 [Source:HGNC Symbol;Acc:HGNC:9269]
ENSG00000158874	78.7149256580136	116.435002320822	35.291847289354	29.4623689331906	250.242266610287	47.8307740395945	287.936659278186	111.204784520541	29.9996383418672	33.7628532423903	32.2693986653754	51.3965186054581	40.4803542171613	50.5841158491833	84.4252624574976	119.639828581249	46.1311630541333	1.37529	0.00366519243947557	0.240358	APOA2	1	161222292	161223631	-	945	protein_coding	apolipoprotein A2 [Source:HGNC Symbol;Acc:HGNC:601]
ENSG00000259645	37.0955396779144	48.8538471276176	7.46558308044027	2.8059398983991	6.58532280553387	4.42877537403653	5.14172605853903	16.6807176780812	0	7.79142767132083	2.01683741658596	7.08917498006318	0.98732571261369	0	0	16.1321814625703	2.55496654008338	2.61971	0.00369513905937773	0.241408	AC027237.4	15	69391192	69392149	+	694	sense_intronic	novel transcript, sense intronic to PAQR5
ENSG00000111913	640.576636389352	730.365014557883	542.951496759293	849.498304240328	1544.25819789769	290.527664536796	956.36104688826	428.138420404084	11876.3274141627	2127.05975427059	911.610512296856	1225.54112467842	348.525976552632	431.018820464916	1059.83856263609	747.834597709211	2568.5603092946	-1.78049	0.00370148530962958	0.241408	RIPOR2	6	24804281	25042170	-	9536	protein_coding	RHO family interacting cell polarization regulator 2 [Source:HGNC Symbol;Acc:HGNC:13872]
ENSG00000269720	0	0	2.71475748379646	1.40296994919955	0	1.77151014961461	0	0	15.8821614751061	10.3885702284278	4.03367483317193	7.08917498006318	10.8605828387506	1.05383574685798	0	0.736154697826328	7.04400001462537	-3.11467	0.0037738279127213	0.243758	CCDC194	19	17390509	17394158	-	1464	protein_coding	coiled-coil domain containing 194 [Source:HGNC Symbol;Acc:HGNC:53438]
ENSG00000257894	1.80953852087388	8.14230785460293	0	7.01484974599775	0	26.5726522442192	4.11338084683122	1.39005980650677	0	0	0	0	0	0	3.01518794491063	6.13034862737897	0.430741134987233	4.23061	0.00378247701882129	0.243758	AC027288.3	12	79341205	79503396	-	2253	lincRNA	novel transcript
ENSG00000279312	99.5246186480631	105.035771324378	13.5737874189823	43.4920684251861	105.365164888542	48.7165291144018	67.8707839727152	145.95627968321	0	8.65714185702315	20.1683741658596	28.3566999202527	20.7338399648875	29.5074009120236	60.3037588982126	78.6918754344348	23.9610308168942	1.72483	0.00380503795913761	0.243758	AL136164.4	6	71373253	71375387	-	2135	TEC	TEC
ENSG00000158813	91.3816953041307	93.6365403279337	77.3705882881992	82.0737420281737	95.4871806802412	121.348445248601	131.628187098599	116.765023746568	16.7645037792787	43.2857092851157	101.850289537591	15.9506437051422	22.7084913901149	84.3068597486388	45.2278191736594	101.211425340306	47.1563309456487	1.10403	0.00380950696808068	0.243758	EDA	X	69616067	70039469	+	6999	protein_coding	ectodysplasin A [Source:HGNC Symbol;Acc:HGNC:3157]
ENSG00000136514	32.5716933757298	51.2965394839985	125.557533625586	144.505904767554	116.889479798226	87.6897524059233	82.2676169366245	102.864425681501	158.821614751061	173.142837140463	92.7745211629544	175.457080756564	275.463873819219	128.567961116674	220.108719978476	92.9553682593929	174.905229817916	-0.911909	0.00381526437768343	0.243758	RTP4	3	187368332	187372076	+	1554	protein_coding	receptor transporter protein 4 [Source:HGNC Symbol;Acc:HGNC:23992]
ENSG00000142512	117.620003856802	139.23346431371	79.4066564010465	143.804419792954	105.365164888542	68.2031407601626	203.612351918146	145.95627968321	1281.16102565856	414.677094951409	126.052338536623	241.918096194656	112.555131237961	99.0605602046506	135.683457520978	125.400185201822	344.443957757834	-1.45888	0.00382304631541363	0.243758	SIGLEC10	19	51410021	51417803	-	3667	protein_coding	sialic acid binding Ig like lectin 10 [Source:HGNC Symbol;Acc:HGNC:15620]
ENSG00000178878	2561.40177629697	4098.83777400712	2776.51821655283	2055.35097557734	1568.95315841845	1196.65510606467	1046.85542551855	3065.08187334742	82.940176592221	584.357075349062	2283.05995557531	753.224841631713	834.290227158568	940.021486197322	951.291796619303	2296.20678822292	918.455079874786	1.32214	0.0038316482671743	0.243758	APOLD1	12	12725917	12829975	+	7243	protein_coding	apolipoprotein L domain containing 1 [Source:HGNC Symbol;Acc:HGNC:25268]
ENSG00000166501	378.19355086264	731.993476128804	264.010165299206	594.85925846061	676.641918268605	201.066401981258	493.605701619747	343.344772207171	6011.39811832767	1141.01129675565	595.975456601152	714.234379241366	504.523439145595	206.551806384165	646.75781418333	460.464405603505	1402.9217586627	-1.6076	0.00383194351180031	0.243758	PRKCB	16	23835946	24220611	+	11086	protein_coding	protein kinase C beta [Source:HGNC Symbol;Acc:HGNC:9395]
ENSG00000136940	807.958949570185	738.507322412486	754.702580495417	784.260201602549	785.299744559914	777.692955680815	777.428980051101	760.362714159201	290.290618072773	560.117078149398	602.02596885091	509.534451692041	663.482878876399	662.862684773672	628.666686513866	773.276681066459	559.568623847009	0.467685	0.00387509627451316	0.243758	PDCL	9	122798389	122828631	-	3147	protein_coding	phosducin like [Source:HGNC Symbol;Acc:HGNC:8770]
ENSG00000237973	5758.85634268111	8426.47439872857	3840.0244608301	4044.7623635423	26621.1674413707	4730.81785454582	24676.1717001405	7603.62714159201	1656.1565049319	3421.30246189555	5226.63416508253	4274.7725129781	4682.88585492673	5887.78031769556	37174.2521728031	10712.7377129289	8903.39771290193	1.28492	0.00388604611321858	0.243758	MTCO1P12	1	631074	632616	+	1543	unprocessed_pseudogene	MT-CO1 pseudogene 12 [Source:HGNC Symbol;Acc:HGNC:52014]
ENSG00000009724	3.61907704174775	14.6561541382853	19.6819917575244	21.746034212593	0	12.4005710473023	2.05669042341561	15.2906578715744	145.586480188473	32.897139056688	18.1515367492737	19.4952311951738	12.835234263978	18.9690434434437	48.2430071185701	11.1813970615553	42.3110960022286	-1.9007	0.00389221314787215	0.243758	MASP2	1	11026523	11047233	-	4251	protein_coding	mannan binding lectin serine peptidase 2 [Source:HGNC Symbol;Acc:HGNC:6902]
ENSG00000260947	3.61907704174775	19.541538851047	4.07213622569469	0	16.4633070138347	3.54302029922922	0	0	28.234953733522	0	0	0	0	0	0	5.90488492894417	4.03356481907458	4.57165	0.00391698953404874	0.243758	AL356489.2	9	33697459	33700986	+	3528	lincRNA	novel transcript
ENSG00000178177	413.47955201968	423.400008439353	387.531630811945	465.084538159651	349.022108693295	332.15815305274	378.431037908473	233.530047493137	233.820710605729	152.365696683607	343.870779527907	197.610752569261	271.514570968765	235.005371549331	319.609922160527	372.829634572284	250.542543437875	0.577956	0.0039297599499214	0.243758	LCORL	4	17841199	18021876	-	14858	protein_coding	ligand dependent nuclear receptor corepressor like [Source:HGNC Symbol;Acc:HGNC:30776]
ENSG00000276570	13.5715389065541	0	5.42951496759293	16.1341544157948	3.29266140276694	19.4866116457607	4.11338084683122	13.9005980650677	59.9992766837343	35.4942816137949	42.3535857483053	27.4705530477448	9.8732571261369	13.6998647091538	27.1366915041957	9.49105753129605	30.8610729190094	-1.69554	0.00395097528554143	0.243758	AC010327.5	19	55227219	55230279	-	3061	processed_transcript	novel transcript
ENSG00000150527	446.05124539541	518.665010338207	636.610629950271	448.950383743856	467.557919192905	490.708311443248	501.832463313409	551.853743183186	893.812754126807	525.488510721305	738.162494470463	628.2781326081	576.598216166395	717.662143610288	627.159092541411	507.778713320061	672.451620606395	-0.404957	0.00396137126054696	0.243758	MIA2	14	39230231	39388513	+	10539	protein_coding	MIA SH3 domain ER export factor 2 [Source:HGNC Symbol;Acc:HGNC:18432]
ENSG00000012124	66.9529252723334	180.759234372185	86.8722394814868	136.088085072356	171.218392943881	69.0888958349699	240.632779539627	109.814724714034	1977.32910365071	396.49709705166	158.321737201998	218.878277509451	179.693279695692	77.9838452674909	69.3493227329445	132.678409653859	439.721809015707	-1.72983	0.00397475632164721	0.243758	CD22	19	35319261	35347355	+	6159	protein_coding	CD22 molecule [Source:HGNC Symbol;Acc:HGNC:1643]
ENSG00000173083	153.810774274279	163.660387877519	166.957585253482	289.713294509707	116.889479798226	207.26668750491	187.158828530821	120.935203166089	831.166450530555	501.24851352164	140.170200452725	236.601214959609	462.068433503207	142.267825825828	254.783381344948	175.799030114379	366.900860019787	-1.06017	0.00398775988870673	0.243758	HPSE	4	83292461	83335153	-	4721	protein_coding	heparanase [Source:HGNC Symbol;Acc:HGNC:5164]
ENSG00000118898	156.52508205559	59.4388473386014	27.1475748379646	68.0440425361782	42.8045982359702	16.8293464213388	20.5669042341561	22.2409569041082	6.17639612920794	24.2399971996648	11.0926057912228	39.8766092628554	60.2268684694351	478.441429073525	1388.49404863134	51.6996690704885	286.935422079608	-2.47009	0.00399985666143251	0.243758	PPL	16	4882507	4960741	-	7686	protein_coding	periplakin [Source:HGNC Symbol;Acc:HGNC:9273]
ENSG00000184985	54.2861556262163	50.4823086985382	43.4361197407434	44.8950383743856	60.9142359511883	77.9464465830429	49.3605701619747	91.7439472294465	54.7052228586989	32.897139056688	34.2862360819614	93.9315684858372	306.070970910244	420.480462996336	165.835336970085	59.133102795692	158.315276765693	-1.42243	0.00400997047092468	0.243758	SORCS2	4	7192538	7742836	+	6317	protein_coding	sortilin related VPS10 domain containing receptor 2 [Source:HGNC Symbol;Acc:HGNC:16698]
ENSG00000172403	1076.67541991996	2391.39581689688	1313.94262215749	1612.01247163028	915.359869969208	2301.19168434938	1334.79208479673	1784.83679155469	11.4704499542433	644.957068348225	1147.58049003741	253.438005537259	608.192638970033	488.979786542105	835.207060740244	1591.27584515933	569.975071447075	1.48158	0.00401050471546847	0.243758	SYNPO2	4	118850688	119061247	+	14034	protein_coding	synaptopodin 2 [Source:HGNC Symbol;Acc:HGNC:17732]
ENSG00000171596	34.3812318966036	21.1700004219676	86.1935501105377	51.2084031457836	52.682582444271	47.8307740395945	38.0487728331888	52.8222726472571	519.69961715764	19.0457120854509	32.2693986653754	29.2428467927606	19.7465142522738	25.2920579245916	9.04556383473189	48.0421984424005	93.4773872446892	0.96521	0.00406214233679562	0.243758	NMUR1	2	231523160	231530495	-	3298	protein_coding	neuromedin U receptor 1 [Source:HGNC Symbol;Acc:HGNC:4518]
ENSG00000171223	5376.13894551628	5811.97934661557	8753.05681713075	7173.3853502573	7194.46516504576	2927.42052223815	5236.33381801615	3167.94629902892	31459.9148552727	12080.1757472901	16249.6590654331	8911.97909681193	4765.82121478628	7642.4168362141	4952.44619951571	5705.09078298111	12294.6304307606	-1.10771	0.00407945051554221	0.243758	JUNB	19	12791496	12793315	+	1820	protein_coding	JunB proto-oncogene, AP-1 transcription factor subunit [Source:HGNC Symbol;Acc:HGNC:6205]
ENSG00000101916	98.6198493876262	242.640774067167	100.446026900469	168.356393903946	197.559684166016	91.2327727051525	92.5510690537025	150.126459102731	754.402670067542	309.059964295726	222.860534532749	228.625893107038	286.32445665797	114.86809640752	168.850524914995	142.691628660851	297.856019997649	-1.06408	0.00408648876763329	0.243758	TLR8	X	12906620	12923169	+	4353	protein_coding	toll like receptor 8 [Source:HGNC Symbol;Acc:HGNC:15632]
ENSG00000259881	14.476308166991	1.62846157092059	1.35737874189823	2.8059398983991	0	3.54302029922922	0	0	21.1762153001415	25.1057113853671	3.02525612487895	10.6337624700948	89.8466398478458	8.43068597486388	0	2.97638858467977	22.6026101575989	-2.89559	0.00409322027574372	0.243758	AC092384.2	16	88881038	88887136	+	3057	antisense	uncharacterized LOC101927793 [Source:NCBI gene;Acc:101927793]
ENSG00000211899	869.483259279897	334.648852824181	1692.65129114709	4473.36968302277	2471.14238277659	891.955360330957	1433.51322512068	717.270860157491	19310.9436691207	772.217053646465	1189.93407578572	497.128395476931	380.120399356271	183.367419953289	242.722629565306	1610.50436433246	3225.20480612924	1.42303	0.00409534514128951	0.243758	IGHM	14	105851705	105856218	-	1871	IG_C_gene	immunoglobulin heavy constant mu [Source:HGNC Symbol;Acc:HGNC:5541]
ENSG00000223878	0	0	0	2.8059398983991	0	0.885755074807306	0	0	14.9998191709336	11.2542844141301	4.03367483317193	0.886146872507898	0.98732571261369	0	21.1063156143744	0.461461871650801	7.60965237396166	-3.81741	0.00409910793225149	0.243758	PPIAP53	17	15506866	15507354	+	489	processed_pseudogene	peptidylprolyl isomerase A pseudogene 53 [Source:HGNC Symbol;Acc:HGNC:53677]
ENSG00000156675	185.477698389572	210.885773434216	186.639577011007	210.445492379933	186.035369256332	32.7729377678703	140.883294003969	191.828253297934	1479.68804409739	360.137101252163	148.237550119068	321.671314720367	221.160959625466	124.352618129242	431.17187612222	168.121049442604	440.917066295131	-1.39142	0.00409937554300635	0.243758	RAB11FIP1	8	37858618	37899467	-	9602	protein_coding	RAB11 family interacting protein 1 [Source:HGNC Symbol;Acc:HGNC:30265]
ENSG00000203971	1.80953852087388	0	2.71475748379646	0	0	10.6290608976877	14.3968329639093	16.6807176780812	0	0	0	0	0	0	0	5.77886344304356	0	4.95387	0.00411979465370949	0.243758	AL354984.1	20	57957126	57959660	-	1854	lincRNA	novel transcript
ENSG00000253476	7.2381540834955	1.62846157092059	0	1.40296994919955	0	0.885755074807306	0	0	16.7645037792787	1.73142837140463	11.0926057912228	9.74761559758688	3.94930285045476	3.16150724057395	16.5835336970085	1.39441758480287	9.00435676107574	-2.62253	0.00412717921961414	0.243758	AC091185.1	8	25425521	25426580	-	528	lincRNA	novel transcript
ENSG00000189430	8.14292334393244	17.9130772801265	8.8229618223385	39.9846435521872	13.1706456110677	11.514815972495	25.7086302926952	15.2906578715744	348.525210148163	49.3457085850319	7.05893095805088	55.8272529679976	14.8098856892053	12.6460289622958	15.0759397245531	17.5685444683021	71.8984224336139	-2.032	0.00412960521824824	0.243758	NCR1	19	54906150	54916140	+	1893	protein_coding	natural cytotoxicity triggering receptor 1 [Source:HGNC Symbol;Acc:HGNC:6731]
ENSG00000170558	58.8100019284009	33.383462203872	23.0754386122699	40.686128526787	65.8532280553387	26.5726522442192	26.736975504403	44.4819138082165	10.5881076500708	53.6742795135435	11.0926057912228	60.257987330537	241.894799590354	364.627168412863	177.896088749727	39.9499751104384	131.433005291188	-1.72096	0.00413769390497829	0.243758	CDH2	18	27950966	28177446	-	4950	protein_coding	cadherin 2 [Source:HGNC Symbol;Acc:HGNC:1759]
ENSG00000261644	26.2383085526712	8.95653864006323	16.2885449027788	30.8653388823901	13.1706456110677	21.2581217953753	53.4739510088059	16.6807176780812	127.939634105022	48.4799943993296	22.1852115824456	57.5995467130134	52.3282627685256	37.9380868868874	36.1822553389275	23.3665208839042	54.6647131134501	-1.22538	0.00415192564058344	0.243758	AC007728.2	16	50727417	50742815	-	3409	antisense	novel transcript, antisense to CYLD and NOD2
ENSG00000142794	119.429542377676	116.435002320822	192.0690919786	198.520247811736	107.011495589925	240.925380347587	234.46270826938	33.3614353561624	101.469364979845	49.3457085850319	32.2693986653754	115.199093426027	61.2141941820488	26.3458936714496	99.5012021820508	155.276863006486	69.3349793845469	1.1666	0.004161752038659	0.243758	NBPF3	1	21440128	21485005	+	6812	protein_coding	NBPF member 3 [Source:HGNC Symbol;Acc:HGNC:25076]
ENSG00000174498	28.952616333982	35.0119237747926	34.6131579184049	32.9697938061894	39.5119368332032	24.8011420946046	79.1825813015011	11.1204784520541	2.64702691251769	5.19428511421389	29.2441425404965	12.4060562151106	13.8225599765917	24.2382221777336	6.03037588982126	35.7704538143415	13.3689526894979	1.4202	0.00417302017777115	0.243758	IGDCC3	15	65327127	65378040	-	5552	protein_coding	immunoglobulin superfamily DCC subclass member 3 [Source:HGNC Symbol;Acc:HGNC:9700]
ENSG00000156587	1147.24742223404	1368.72195035875	1552.84128073158	1466.10359691353	1674.31832330699	1205.51265681274	1485.95883091778	1499.8745312208	2860.55375012745	2340.02544395336	1450.10610252531	1716.4664920478	3008.38144633391	1390.00935010568	1858.8633680374	1425.07232406203	2089.20085044727	-0.552361	0.00417581084577216	0.243758	UBE2L6	11	57551656	57568284	-	2197	protein_coding	ubiquitin conjugating enzyme E2 L6 [Source:HGNC Symbol;Acc:HGNC:12490]
ENSG00000161381	4989.80247130971	3725.9200742663	2601.41635884796	2786.99980408491	2729.61630289379	5496.11023917933	5019.3529783458	5850.76172558698	855.872035047387	1807.61121974643	4127.45777304318	1644.68859537466	2293.5576304016	2102.40231498168	3054.38538819447	4149.99749431435	2269.42499382706	0.87092	0.00417857874545919	0.243758	PLXDC1	17	39063303	39154394	-	9277	protein_coding	plexin domain containing 1 [Source:HGNC Symbol;Acc:HGNC:20945]
ENSG00000229956	0	3.25692314184117	4.07213622569469	1.40296994919955	4.9389921041504	2.65726522442192	0	0	3.52936921669025	9.52285604272546	10.0841870829298	14.1783499601264	4.93662856306845	2.10767149371597	21.1063156143744	2.04103583066347	9.35219685337582	-2.18455	0.00418104139633581	0.243758	ZRANB2-AS2	1	71081324	71489976	+	7441	processed_transcript	ZRANB2 antisense RNA 2 (head to head) [Source:HGNC Symbol;Acc:HGNC:43595]
ENSG00000131979	326.621703017734	229.613081499803	225.324871155106	363.369216842684	317.741825367009	245.354155721624	321.872051264543	261.331243623272	1612.03938972327	408.617095651493	444.712650357205	513.965186054581	391.968307907635	236.059207296189	364.837741334186	286.403518561472	567.457082617795	-0.987308	0.00418815339740213	0.243758	GCH1	14	54842008	54902852	-	2951	protein_coding	GTP cyclohydrolase 1 [Source:HGNC Symbol;Acc:HGNC:4193]
ENSG00000137727	23.5240007713604	21.1700004219676	46.829566595489	54.0143430441827	29.6339526249024	70.8604059845845	60.6723674907606	19.4608372910947	9.7057653458982	12.9857127855347	27.2273051239105	19.4952311951738	28.632445665797	8.43068597486388	0	40.7706842780427	15.2110208701683	1.41341	0.00419029590651645	0.243758	ARHGAP20	11	110577042	110713189	-	7125	protein_coding	Rho GTPase activating protein 20 [Source:HGNC Symbol;Acc:HGNC:18357]
ENSG00000092820	1748.01421116416	2115.37158062584	2546.44251980108	2274.91577262707	2199.49781704831	1935.37483845396	2136.90134992882	3129.02462444673	5822.57686523475	2823.09395957525	2292.13572394995	2357.15068087101	3414.17231421814	3676.83292078751	3627.27109772749	2260.692839262	3430.46193748058	-0.601771	0.0041909982516465	0.243758	EZR	6	158765741	158819412	-	3342	protein_coding	ezrin [Source:HGNC Symbol;Acc:HGNC:12691]
ENSG00000185905	39.8098474592253	180.759234372185	164.242827769686	213.251432278332	329.266140276694	50.4880392640165	152.195091332755	83.4035883904059	2656.73267786359	413.811380765706	240.00365257373	108.996065318471	172.781999707396	60.0686375709051	269.859321069501	151.677025142912	560.321962124185	-1.88637	0.00421081707897531	0.243758	C16orf54	16	29742463	29746006	-	2585	protein_coding	chromosome 16 open reading frame 54 [Source:HGNC Symbol;Acc:HGNC:26649]
ENSG00000126012	2019.44498929524	1583.67887772027	1990.59592499376	1691.98175873466	1733.58622855679	1557.15742151124	1858.21979755601	2043.38791556495	3055.55139934959	2386.77400998128	2132.80556803966	2723.12933921677	2098.06713930409	2208.83972541434	1836.24945845057	1809.75661424161	2348.77380567947	-0.376714	0.00421377633794353	0.243758	KDM5C	X	53191321	53225422	-	8727	protein_coding	lysine demethylase 5C [Source:HGNC Symbol;Acc:HGNC:11114]
ENSG00000239482	1.80953852087388	0	12.2164086770841	2.8059398983991	19.7559684166016	2.65726522442192	23.6519398692795	6.95029903253383	0	2.59714255710694	0	0	0	3.16150724057395	0	8.73091995489925	0.822664256811557	3.36762	0.00421611714772632	0.243758	AC112487.1	3	112302478	112332791	+	1262	lincRNA	novel transcript
ENSG00000179774	7.2381540834955	14.6561541382853	1.35737874189823	8.4178196951973	0	7.08604059845845	14.3968329639093	0	0	0	2.01683741658596	1.7722937450158	0	0	0	6.64404752765551	0.541304451657394	3.5618	0.00421872428383223	0.243758	ATOH7	10	68230624	68232103	-	1480	protein_coding	atonal bHLH transcription factor 7 [Source:HGNC Symbol;Acc:HGNC:13907]
ENSG00000113272	500.337401021626	470.62539399605	454.721878535908	337.414272782492	530.118485845477	458.821128750185	459.670309633389	432.308599823604	411.171513744415	315.985677781345	328.744498903512	342.938839660556	398.879587895931	372.004018640869	334.68586188508	455.502183798591	357.772856930244	0.345573	0.00422247767159078	0.243758	THG1L	5	157731197	157741448	+	3220	protein_coding	tRNA-histidine guanylyltransferase 1 like [Source:HGNC Symbol;Acc:HGNC:26053]
ENSG00000145779	1184.34296191195	1077.22732916397	1046.53901000354	1196.03188169262	1328.58887601646	728.090671491606	791.825813015011	985.552402813297	4098.48000288156	1354.84270062412	1069.93224949885	1720.89722641034	1325.97843204019	1847.37406424205	1219.64352371635	1042.27486826356	1805.30688563049	-0.792884	0.00422901643881036	0.243758	TNFAIP8	5	119268692	119399688	+	9591	protein_coding	TNF alpha induced protein 8 [Source:HGNC Symbol;Acc:HGNC:17260]
ENSG00000144218	22.6192315109234	5.69961549822205	25.7901960960664	37.1787036537881	9.87798420830081	42.5162435907507	10.2834521170781	36.1415549691759	402.348090702689	39.8228525423065	24.2020489990316	21.2675249401895	15.797211401819	41.0995941274614	70.8569167053998	23.7633727055382	87.9134627741281	-1.88543	0.00424979306434993	0.243758	AFF3	2	99545419	100142739	-	12737	protein_coding	AF4/FMR2 family member 3 [Source:HGNC Symbol;Acc:HGNC:6473]
ENSG00000101849	678.576945327703	556.11962646938	599.961403919018	579.426589019414	658.532280553387	786.550506428888	644.772447740794	789.553970095843	1621.74515506917	1167.84843651242	695.808908722158	1063.37624700948	770.114055838678	780.892288421767	750.781798282747	661.686721194304	978.652412836631	-0.565931	0.00425009266818535	0.243758	TBL1X	X	9463295	9741037	+	9092	protein_coding	transducin beta like 1 X-linked [Source:HGNC Symbol;Acc:HGNC:11585]
ENSG00000088826	1250.39111792385	1437.11733633742	841.574819976904	981.377479465086	941.701161191344	626.228837888765	713.671576925217	792.334089708856	1733.80262769909	1349.64841550991	983.208240585658	1820.14567613122	1216.38527794007	2111.8868367034	1141.24863714867	948.04955242718	1479.475101674	-0.641961	0.00425398156003397	0.243758	SMOX	20	4120980	4187747	+	2946	protein_coding	spermine oxidase [Source:HGNC Symbol;Acc:HGNC:15862]
ENSG00000109424	0	0	39.3639835150487	25.2534590855919	23.0486298193686	1.77151014961461	0	2.78011961301353	0	1.73142837140463	0	1.7722937450158	0	0	0	11.5272127728297	0.500531730917204	4.41353	0.00425990478076359	0.243758	UCP1	4	140559434	140568805	-	1462	protein_coding	uncoupling protein 1 [Source:HGNC Symbol;Acc:HGNC:12517]
ENSG00000120251	6.33338482305856	19.541538851047	2.03606811284735	2.10445492379933	23.0486298193686	7.97179567326576	67.8707839727152	9.73041864554736	0	3.46285674280926	5.04209354146491	4.43073436253949	2.96197713784107	0	7.53796986227657	17.3296343527061	3.34794737813304	2.39262	0.0042614647836851	0.243758	GRIA2	4	157204182	157366075	+	8941	protein_coding	glutamate ionotropic receptor AMPA type subunit 2 [Source:HGNC Symbol;Acc:HGNC:4572]
ENSG00000137673	1191.58111599545	19296.4553846235	3971.01150942328	3508.12635797348	2212.66846265938	830.838260169253	3875.83310292672	3198.52761477207	0	1604.16838610639	1115.31109137204	147.986527708819	1293.39668352393	445.772520920927	820.131121015691	4760.63022606789	775.252332949686	2.61844	0.00427843134715252	0.243758	MMP7	11	102520508	102530753	-	2323	protein_coding	matrix metallopeptidase 7 [Source:HGNC Symbol;Acc:HGNC:7174]
ENSG00000203812	0	3.25692314184117	3.39344685474558	5.6118797967982	0	3.54302029922922	7.19841648195464	2.78011961301353	44.1171152086282	7.79142767132083	6.05051224975789	20.3813780676816	16.7845371144327	10.5383574685798	0	3.22297577344779	15.0947611114859	-2.20425	0.0042802349126041	0.243758	HIST2H2AA3	1	149842188	149842736	-	549	protein_coding	histone cluster 2 H2A family member a3 [Source:HGNC Symbol;Acc:HGNC:4736]
ENSG00000260891	0	0	3.39344685474558	2.10445492379933	0	0.885755074807306	0	0	23.8232422126592	5.19428511421389	4.03367483317193	7.97532185257108	5.92395427568214	0	6.03037588982126	0.797957106669026	7.56869345401707	-3.08459	0.00429869815413574	0.244226	AC020978.3	16	68212401	68221671	-	460	antisense	novel transcript, intronic to NFATC3
ENSG00000260063	9.04769260436938	48.8538471276176	30.5410216927102	23.1490041617926	26.3412912221355	11.514815972495	51.4172605853903	19.4608372910947	7.94108073755307	16.448569528344	16.1346993326877	7.97532185257108	16.7845371144327	6.32301448114791	9.04556383473189	27.5407213322007	11.5218266973526	1.25421	0.00431955085022367	0.244826	AL512408.1	1	26692132	26694131	-	2000	antisense	uncharacterized LOC101928728 [Source:NCBI gene;Acc:101928728]
ENSG00000123405	213.525545463117	172.616926517582	187.318266381956	404.055345369471	505.423525324725	66.431630610548	213.895804035224	197.388492523961	1254.69075653339	1315.01984808182	166.389086868342	1254.78397147118	175.743976845237	112.760424913804	613.590746789313	245.081942028323	698.996973071869	-1.51319	0.00434398962485737	0.245508	NFE2	12	54292111	54301121	-	2469	protein_coding	nuclear factor, erythroid 2 [Source:HGNC Symbol;Acc:HGNC:7780]
ENSG00000272419	89.5721567832568	34.1976929893323	73.2984520625045	95.4019565455694	47.7435903401206	48.7165291144018	52.4456057970981	48.6520932277368	472.935475036494	66.6599922990782	94.7913585795403	97.4761559758688	74.0494284460267	74.8223380269169	125.130299713791	61.2535096075026	143.695006868245	-1.22783	0.00436179144443224	0.245508	LINC01145	1	145164099	145216058	-	6056	transcribed_unprocessed_pseudogene	long intergenic non-protein coding RNA 1145 [Source:HGNC Symbol;Acc:HGNC:49462]
ENSG00000237870	26.2383085526712	34.1976929893323	28.5049535798629	22.4475191871928	9.87798420830081	4.42877537403653	6.17007127024684	58.3825118732841	0	1.73142837140463	11.0926057912228	8.86146872507898	13.8225599765917	2.10767149371597	0	23.7809771293659	5.37367633685915	2.13158	0.00437660461894783	0.245508	AC073130.1	7	116275606	116286734	-	2560	processed_transcript	uncharacterized LOC102724434 [Source:NCBI gene;Acc:102724434]
ENSG00000228327	85.9530797415091	64.3242320513632	57.0099071597257	72.2529523837769	42.8045982359702	63.774365386126	53.4739510088059	94.52406684246	219.703233738968	141.97712645518	130.086013369795	132.922030876185	44.429657067616	82.1991882549228	93.4708262922295	66.7646441012171	120.684010864985	-0.855807	0.00437949740832657	0.245508	AL669831.1	1	725885	778626	-	6432	transcribed_unprocessed_pseudogene	general transcription factor IIi (GTF2I) pseudogene
ENSG00000273270	234.335238453167	273.581543914659	213.787151848971	237.803406389324	271.644565728272	375.560151718298	480.237213867545	248.820705364711	183.527199267893	191.322835040212	203.700579075182	129.377443386153	185.617233971374	253.974414992774	202.017592309012	291.971247160618	192.791042577514	0.599472	0.00439110075855395	0.245508	AC090114.2	7	128524016	128531069	-	7054	lincRNA	novel transcript
ENSG00000106809	10.8572311252433	30.1265390620309	80.0853457719957	141.699964869155	195.913353464633	36.3159580670996	47.3038797385591	184.8779542654	5.29405382503538	131.588556226752	112.942895328814	23.9259655577132	862.922672824365	1268.81823921701	560.824957753377	90.8975282955144	423.759620104724	-2.223	0.00440361273274611	0.245508	OGN	9	92383967	92404696	-	3321	protein_coding	osteoglycin [Source:HGNC Symbol;Acc:HGNC:8126]
ENSG00000276710	5.42861556262163	3.25692314184117	6.10820433854204	6.31336477139798	4.9389921041504	10.6290608976877	0	12.5105382585609	91.7635996339466	3.46285674280926	32.2693986653754	6.20302810755528	7.89860570090952	13.6998647091538	18.0911276694638	6.14821238435022	24.7697830327448	-2.02044	0.00440378251327021	0.245508	CSPG4P10	15	82459472	82477258	+	7178	transcribed_unprocessed_pseudogene	chondroitin sulfate proteoglycan 4 pseudogene 10 [Source:HGNC Symbol;Acc:HGNC:48361]
ENSG00000252061	5.42861556262163	6.51384628368235	5.42951496759293	3.50742487299888	0	2.65726522442192	0	2.78011961301353	90.881257329774	4.32857092851157	24.2020489990316	9.74761559758688	2.96197713784107	1.05383574685798	4.52278191736594	3.2895983155414	19.671155379567	-2.54752	0.00441906548653227	0.245785	RNU6-415P	15	78898840	78898936	-	97	snRNA	RNA, U6 small nuclear 415, pseudogene [Source:HGNC Symbol;Acc:HGNC:47378]
ENSG00000254505	18.0953852087388	17.0988464946662	20.3606811284735	14.0296994919955	27.987621923519	23.9153870197973	16.4535233873249	19.4608372910947	142.939453275955	44.1514234708181	29.2441425404965	23.0398186852053	15.797211401819	55.8532945834732	19.5987216419191	19.6752477432012	47.2320093713838	-1.27695	0.00448192990178028	0.24773	CHMP4A	14	24209583	24213869	-	2413	protein_coding	charged multivesicular body protein 4A [Source:HGNC Symbol;Acc:HGNC:20274]
ENSG00000156599	1441.29743187604	1426.53233612643	1893.54334494803	1534.84912442431	1399.38109617595	1318.88930638808	1271.03468167085	1558.25704309408	2024.09324577186	1729.69694303322	1980.53434308742	2275.62516860028	1968.7274709517	1639.76842211102	1570.91291929844	1480.47304558797	1884.19407326485	-0.347903	0.00448474838315697	0.24773	ZDHHC5	11	57667747	57701187	+	5429	protein_coding	zinc finger DHHC-type containing 5 [Source:HGNC Symbol;Acc:HGNC:18472]
ENSG00000177663	1563.44128203503	1992.42273202134	1663.46764819628	1532.74466950051	1371.39347425243	1373.80612102613	1885.98511827212	1284.41526121225	4961.41077636232	2843.8711000321	2101.54458808258	3478.1264745935	2229.38145908171	1588.13047051498	1279.94728261456	1583.45953831451	2640.34459304025	-0.737745	0.00448526215413191	0.24773	IL17RA	22	17084954	17115694	+	9036	protein_coding	interleukin 17 receptor A [Source:HGNC Symbol;Acc:HGNC:5985]
ENSG00000173821	3748.45904599023	4019.85738781747	3512.21749466167	4130.34353044348	4708.50580595672	3353.46871322046	4945.31212310284	3231.88905012823	19040.9469240439	4888.68800666097	5442.43576865722	5471.07079086376	6249.77176084466	4092.04420504955	5168.03213757682	3956.25664391514	7193.28422767099	-0.862593	0.00450144328516503	0.248048	RNF213	17	80260866	80398786	+	28570	protein_coding	ring finger protein 213 [Source:HGNC Symbol;Acc:HGNC:14539]
ENSG00000255769	25.3335392922343	15.4703849237456	12.2164086770841	23.1490041617926	6.58532280553387	10.6290608976877	20.5669042341561	5.56023922602706	141.17476866761	14.7171411569394	29.2441425404965	22.1536718126974	9.8732571261369	56.9071303303312	33.1670673940169	14.9388580272827	43.8910255754612	-1.54159	0.00451568769681947	0.248185	GOLGA2P10	15	82472993	82513950	-	1758	transcribed_unprocessed_pseudogene	GOLGA2 pseudogene 10 [Source:HGNC Symbol;Acc:HGNC:26229]
ENSG00000272572	21.7144622504865	0	10.8590299351859	4.20890984759865	0	14.1720811969169	10.2834521170781	11.1204784520541	3.52936921669025	0.865714185702315	1.00841870829298	0	1.97465142522738	2.10767149371597	0	9.04480172491501	1.35511786137556	2.712	0.00455755740618396	0.248185	AL138762.1	10	100911103	100912739	-	1637	antisense	novel transcript, antisense to FAM178A
ENSG00000260276	9.04769260436938	8.95653864006323	23.0754386122699	31.5668238569899	32.9266140276694	25.6868971694119	22.6235946575717	30.5813157431488	54.7052228586989	49.3457085850319	25.2104677073246	48.7380779879344	30.6070970910244	37.9380868868874	66.3341347880338	23.0581144139368	44.6969708435622	-0.965604	0.00456126033668909	0.248185	AC022167.2	16	8848105	8860456	+	2642	antisense	novel transcript, antisense to CARHSP1
ENSG00000005812	1353.53481361366	1772.58041994706	1279.32946423908	1407.88034402175	1340.11319092614	1326.86110206134	1110.61282864443	2022.53701846734	1080.86932261139	779.142767132083	1095.14271720618	1013.75202214904	1094.94421528858	1200.31891567124	1234.7194634409	1451.6811477401	1071.26991764277	0.438615	0.0045696921811898	0.248185	FBXL3	13	76992598	77027195	-	7082	protein_coding	F-box and leucine rich repeat protein 3 [Source:HGNC Symbol;Acc:HGNC:13599]
ENSG00000114923	253.335392922343	229.613081499803	128.950980480332	183.789063345141	329.266140276694	550.053901455337	403.11132298946	318.323695690049	93.5282842422917	180.934264811784	137.144944327846	116.085240298535	179.693279695692	286.643323145372	134.175863548523	299.555447332395	161.172171438577	0.893136	0.00457285515972727	0.248185	SLC4A3	2	219627327	219641980	+	5091	protein_coding	solute carrier family 4 member 3 [Source:HGNC Symbol;Acc:HGNC:11029]
ENSG00000172548	36.1907704174775	17.0988464946662	1.35737874189823	12.626729542796	0	1.77151014961461	20.5669042341561	8.34035883904059	16.7645037792787	29.4342823138787	2.01683741658596	14.1783499601264	20.7338399648875	102.222067445225	293.980824628786	12.2440623024561	68.4758150726812	-2.47275	0.00457350774265987	0.248185	NIPAL4	5	157460019	157474717	+	4208	protein_coding	NIPA like domain containing 4 [Source:HGNC Symbol;Acc:HGNC:28018]
ENSG00000170615	0	0	0	0	0	0	0	0	19.4115306917964	1.73142837140463	6.05051224975789	1.7722937450158	0	4.21534298743194	0	0	4.74015829220095	-4.75124	0.00458241266045627	0.248185	SLC26A5	7	103352730	103446177	-	3377	protein_coding	solute carrier family 26 member 5 [Source:HGNC Symbol;Acc:HGNC:9359]
ENSG00000064218	142.048773888599	317.550006329514	234.147832977445	230.788556643326	162.986739436963	318.87182693063	165.563579084957	346.124891820185	0	110.811415769896	178.490111367858	12.4060562151106	72.0747770207993	46.3687728617513	93.4708262922295	239.760275888952	73.3745656468064	1.70951	0.00459703740332331	0.248185	DMRT3	9	976964	991731	+	2387	protein_coding	doublesex and mab-3 related transcription factor 3 [Source:HGNC Symbol;Acc:HGNC:13909]
ENSG00000261222	45.2384630218469	25.2411543492691	17.645923644677	8.4178196951973	9.87798420830081	6.20028552365114	16.4535233873249	22.2409569041082	323.819625631331	82.2428476417199	24.2020489990316	38.9904623903475	15.797211401819	8.43068597486388	15.0759397245531	18.9145138417969	72.6512602519523	-1.94251	0.00459964566677157	0.248185	AC064805.1	17	74599840	74607229	+	3602	lincRNA	novel transcript
ENSG00000120833	962.674493104902	809.345400747531	682.082817803861	719.02209896477	653.593288449237	707.718304771038	609.808710542729	886.858156551316	380.289533098375	382.645670080423	745.221425428514	505.98986420201	440.347267825706	467.903071604945	723.645106778551	753.887908866923	520.863134145503	0.535125	0.00460817831722011	0.248185	SOCS2	12	93569814	93583487	+	6776	protein_coding	suppressor of cytokine signaling 2 [Source:HGNC Symbol;Acc:HGNC:19382]
ENSG00000120471	5.42861556262163	0	0	0	0	1.77151014961461	6.17007127024684	1.39005980650677	1.76468460834513	1.73142837140463	6.05051224975789	7.08917498006318	3.94930285045476	31.6150724057395	48.2430071185701	1.84503209862373	14.3490260834765	-2.95092	0.00462859016899948	0.248721	TP53AIP1	11	128934731	128943399	-	3445	protein_coding	tumor protein p53 regulated apoptosis inducing protein 1 [Source:HGNC Symbol;Acc:HGNC:29984]
ENSG00000138376	281.383239995888	251.597312707231	301.338080701407	305.847448925502	404.997352540333	184.23705555992	231.377672634256	286.352320140394	138.527741755092	129.857127855347	279.331982197156	132.035884003677	158.959439730804	203.390299143591	232.169471758118	280.891310400616	182.038849491969	0.626783	0.00465163831759993	0.249201	BARD1	2	214725646	214809711	-	6067	protein_coding	BRCA1 associated RING domain 1 [Source:HGNC Symbol;Acc:HGNC:952]
ENSG00000160326	894.816798572131	666.85501329198	642.040144917863	814.424055510339	800.116720872366	545.625126081301	691.047982267646	846.54642216262	1736.4496546116	1193.81986208349	839.004365299761	990.71220346383	781.961964390042	1573.37677005897	741.736234448015	737.684032959531	1122.43729347939	-0.606461	0.00465845241619685	0.249201	SLC2A6	9	133471095	133479137	-	3540	protein_coding	solute carrier family 2 member 6 [Source:HGNC Symbol;Acc:HGNC:11011]
ENSG00000082074	844.149719987663	1120.38156079336	835.466615638362	918.945316725706	1509.68525316864	556.254186978988	1008.80665268536	786.773850482829	9179.00699030718	1664.76837910555	917.661024546614	1479.86527708819	1177.87957514813	593.309525481045	1736.74825626852	947.557894557614	2392.7484325636	-1.33666	0.00468986065738712	0.250319	FYB1	5	39105255	39274528	-	8850	protein_coding	FYN binding protein 1 [Source:HGNC Symbol;Acc:HGNC:4036]
ENSG00000158805	515.718478449054	386.759623093639	475.76124903533	568.904314400418	581.154737588364	491.594066518055	758.918766240361	448.989317501685	2466.14674016231	793.859908289023	778.499242802182	910.958984938119	527.23193053571	569.071303303312	726.660294723462	528.475069103363	967.489772107732	-0.872954	0.00470485990596689	0.250557	ZNF276	16	89720400	89740903	+	7427	protein_coding	zinc finger protein 276 [Source:HGNC Symbol;Acc:HGNC:23330]
ENSG00000119535	2376.82884716784	2289.61696871434	1839.2481952721	2913.96858448747	4519.17777529762	829.066750019639	2911.2452943448	1274.6848425667	13195.4291589007	13166.6470503465	1880.70089096641	11063.5437032611	2389.32822452513	1265.65673197644	2178.47329019793	2369.22965723381	6448.5398643106	-1.44469	0.00472826997758852	0.250774	CSF3R	1	36466043	36483278	-	8429	protein_coding	colony stimulating factor 3 receptor [Source:HGNC Symbol;Acc:HGNC:2439]
ENSG00000180747	47.0480015427208	7.32807706914264	24.4328173541682	35.7757337045885	39.5119368332032	24.8011420946046	16.4535233873249	33.3614353561624	199.409360742999	21.6428546425579	80.6734966634386	57.5995467130134	51.3409370559119	37.9380868868874	45.2278191736594	28.5890834177394	70.5474431254954	-1.31103	0.00473532504938819	0.250774	SMG1P3	16	21446683	21520444	-	7107	transcribed_unprocessed_pseudogene	SMG1 pseudogene 3 [Source:HGNC Symbol;Acc:HGNC:49860]
ENSG00000188522	195.430160254379	84.6800016878705	166.957585253482	137.491055021556	166.27940083973	75.289181358621	124.429770616645	169.587296393825	187.056568484583	196.517120154425	118.993407578572	285.339292947543	212.275028211943	264.512772461354	511.074356662352	140.018056428264	253.681220928682	-0.856396	0.00474751551194998	0.250774	FAM83G	17	18968789	19004804	-	7876	protein_coding	family with sequence similarity 83 member G [Source:HGNC Symbol;Acc:HGNC:32554]
ENSG00000241657	5.42861556262163	0	6.78689370949116	0.701484974599775	13.1706456110677	0	0	4.1701794195203	104.116391892362	31.1657106852833	10.0841870829298	8.86146872507898	2.96197713784107	4.21534298743194	9.04556383473189	3.78222740966258	24.3500917636656	-2.73797	0.00475223149452284	0.250774	TRBV11-2	7	142433895	142434394	+	408	lincRNA	T cell receptor beta variable 11-2 [Source:HGNC Symbol;Acc:HGNC:12181]
ENSG00000166148	1715.44251778843	1277.5281023872	3883.46058057084	2929.40125392866	1641.39170927932	1620.04603182256	1257.66619391865	2593.85159894162	45.8817998169733	383.511384266125	2492.81104690025	673.471623106002	654.596947462876	614.386240418205	606.052776927036	2114.84849857966	781.530259842496	1.43629	0.00476494745163898	0.250774	AVPR1A	12	63142759	63150942	-	5963	protein_coding	arginine vasopressin receptor 1A [Source:HGNC Symbol;Acc:HGNC:895]
ENSG00000187764	992.53187869932	857.385017089689	1390.63452107474	1424.71598341214	1694.07429172359	442.877537403653	891.575298550668	688.079604220849	8656.66034623702	2908.79966395978	1097.15955462276	2903.01715433587	1104.81747241472	728.200501078867	1082.45247222292	1047.73426652183	2640.15816641028	-1.33354	0.00477213886439775	0.250774	SEMA4D	9	89360787	89498130	-	14160	protein_coding	semaphorin 4D [Source:HGNC Symbol;Acc:HGNC:10732]
ENSG00000070831	15.3810774274279	14.6561541382853	11.537719306135	33.6712787807892	26.3412912221355	27.4584073190265	43.1904988917279	40.3117343886962	194.115306917964	36.3599957994972	49.4125167063561	30.1289936652685	37.5183770793202	36.8842511400295	64.8265408155785	26.5685201842779	64.1779974462877	-1.28134	0.00478571139326611	0.250934	CDC42	1	22052627	22092946	+	3598	protein_coding	cell division cycle 42 [Source:HGNC Symbol;Acc:HGNC:1736]
ENSG00000279204	109.477080512869	83.0515401169499	145.239525383111	109.431656037565	110.304156992692	185.122810634727	151.166746121047	73.6731697448586	2.64702691251769	58.0028504420551	85.7155902049035	67.3471623106002	59.2395427568214	61.1224733177631	39.1974432838382	120.933335692978	53.3245841754999	1.18186	0.00479856147637535	0.251054	AC134043.2	5	159106380	159108617	+	2238	TEC	TEC
ENSG00000178796	12.6667696461171	0	0.678689370949116	1.40296994919955	23.0486298193686	0	14.3968329639093	0	0	0	0	0.886146872507898	0	0	0	6.52423646869295	0.126592410358271	4.70834	0.00482244567598433	0.251751	RIIAD1	1	151710433	151729805	+	2261	protein_coding	regulatory subunit of type II PKA R-subunit (RIIa) domain containing 1 [Source:HGNC Symbol;Acc:HGNC:26686]
ENSG00000174740	147.477389451221	96.0792326843146	205.642879397582	96.1034415201692	197.559684166016	79.7179567326576	60.6723674907606	122.325262972595	0	45.8828518422227	78.6566592468526	42.5350498803791	31.5944228036381	79.0376810143488	39.1974432838382	125.697276801915	45.2720154387542	1.47342	0.00483445777351846	0.251826	PABPC5	X	91434595	91438584	+	3450	protein_coding	poly(A) binding protein cytoplasmic 5 [Source:HGNC Symbol;Acc:HGNC:13629]
ENSG00000165995	214.430314723554	131.905387244568	142.524767899314	88.3871067995717	65.8532280553387	165.636198988966	148.081710485924	223.799628847589	68.82269972546	37.2257099851995	150.254387535654	60.257987330537	56.2775656189803	42.1534298743194	114.577141906604	147.577292880603	75.6527031395364	0.968724	0.00485075757920024	0.252123	CACNB2	10	18140677	18543557	+	8955	protein_coding	calcium voltage-gated channel auxiliary subunit beta 2 [Source:HGNC Symbol;Acc:HGNC:1402]
ENSG00000213024	2100.87422273457	1814.10619000553	1917.9761623022	1921.36734542878	1703.95227593189	1570.44374763335	1757.44196680864	2032.26743711289	1965.85865369647	2557.31970456464	2252.80739432652	2250.81305617006	2428.82125302968	2730.48842010904	1911.62915707334	1852.30366849473	2299.67680556711	-0.312272	0.00487284424332454	0.252719	NUP62	19	49906825	49929763	-	6020	protein_coding	nucleoporin 62 [Source:HGNC Symbol;Acc:HGNC:8066]
ENSG00000267506	1.80953852087388	32.5692314184117	14.9311661608805	18.2386093395942	16.4633070138347	15.9435913465315	10.2834521170781	19.4608372910947	0	3.46285674280926	8.06734966634386	4.43073436253949	3.94930285045476	10.5383574685798	6.03037588982126	16.2124666510374	5.21128242579264	1.65709	0.00492124183760256	0.253818	AC021683.2	17	77546940	77563243	+	5079	lincRNA	uncharacterized LOC100507351 [Source:NCBI gene;Acc:100507351]
ENSG00000070476	622.481251180613	482.838855777954	485.262900228618	519.098881203834	480.728564803973	535.88182025842	571.75993770954	436.478779243124	1438.21795580128	811.174192003069	551.605033436261	699.169882408731	571.661587603326	630.193776621075	711.584354998908	516.816373800759	773.372397553236	-0.581594	0.00492224414701232	0.253818	ZXDC	3	126437601	126475919	-	7357	protein_coding	ZXD family zinc finger C [Source:HGNC Symbol;Acc:HGNC:28160]
ENSG00000170684	73.2863100953919	34.1976929893323	55.6525284178275	53.3128580695829	75.7312122636395	41.6304885159434	57.5873318556371	73.6731697448586	222.350260651486	180.934264811784	80.6734966634386	73.5501904181555	105.643851249665	45.3149371148933	72.3645106778551	58.1339489940267	111.547358798182	-0.949747	0.00493448900513284	0.253818	ZNF296	19	45071500	45076588	-	1744	protein_coding	zinc finger protein 296 [Source:HGNC Symbol;Acc:HGNC:15981]
ENSG00000068079	731.053562433045	733.621937699724	1097.44071282472	815.125540484939	874.201602434622	832.609770318868	953.276011253136	771.483192611255	1060.57544961542	1956.51405968723	873.290601381723	1148.44634677024	2391.30287595036	974.798065843636	987.474051958231	851.101541257539	1341.77163588669	-0.656904	0.0049366921434165	0.253818	IFI35	17	43006725	43014456	+	1973	protein_coding	interferon induced protein 35 [Source:HGNC Symbol;Acc:HGNC:5399]
ENSG00000083807	87.7626182623829	54.5534626258397	166.278895882533	104.521261215367	116.889479798226	100.976078528033	133.684877522015	119.545143359582	83.8225188963935	91.7657036844454	77.6482405385596	66.4610154380923	57.264891331594	49.5302801023253	51.2581950634807	110.526477149247	68.2501207221273	0.689263	0.00496132885997938	0.254443	SLC27A5	19	58479512	58512413	-	8025	protein_coding	solute carrier family 27 member 5 [Source:HGNC Symbol;Acc:HGNC:10999]
ENSG00000240291	109.477080512869	108.292694466219	34.6131579184049	98.2078964439686	72.4385508608726	116.919669874564	101.806175959073	51.4322128407503	63.5286459004246	54.5399936992458	48.4040979980632	34.559728027808	28.632445665797	61.1224733177631	52.765789035936	86.6484298595903	49.079024806434	0.82393	0.00497021901459412	0.254443	AL450384.2	10	18513115	18545651	-	1575	antisense	novel transcript, antisense to CACNB2
ENSG00000165795	681.291253109014	1844.23272906756	654.256553594948	928.766106370103	749.080469129478	1502.24060687319	1108.55613822101	635.257331573592	366.172056231614	591.282788834681	951.947260628575	225.081305617006	426.524707849114	355.142646691141	791.48683553904	1012.96014849236	529.662514484453	0.936381	0.00498339593708204	0.25457	NDRG2	14	21016763	21070872	-	7550	protein_coding	NDRG family member 2 [Source:HGNC Symbol;Acc:HGNC:14460]
ENSG00000184408	190.001544691757	358.261545602529	169.672342737279	103.118291266167	75.7312122636395	542.082105782071	224.179256152302	109.814724714034	0	57.1371362563528	89.7492650380754	62.9164279480607	77.9987312964815	124.352618129242	81.410074512587	221.607627901222	70.5091790258285	1.65427	0.00499636177452806	0.254686	KCND2	7	120273668	120750331	+	5555	protein_coding	potassium voltage-gated channel subfamily D member 2 [Source:HGNC Symbol;Acc:HGNC:6238]
ENSG00000185883	9.04769260436938	4.88538471276176	6.10820433854204	8.4178196951973	19.7559684166016	13.2863261221096	11.3117973287859	27.8011961301353	113.822157238261	29.4342823138787	15.1262806243947	24.8121124302211	20.7338399648875	22.1305506840177	13.5683457520978	12.5767986685629	34.2325098582512	-1.48476	0.00501281654432774	0.254715	ATP6V0C	16	2513870	2520218	+	1498	protein_coding	ATPase H+ transporting V0 subunit c [Source:HGNC Symbol;Acc:HGNC:855]
ENSG00000275070	1.80953852087388	0	0	4.91039482219843	3.29266140276694	8.85755074807306	0	2.78011961301353	31.7643229502123	6.0599992999162	14.1178619161018	12.4060562151106	3.94930285045476	2.10767149371597	30.1518794491063	2.70628313836573	14.3652991678025	-2.40933	0.00501833865276869	0.254715	RF00017	X	129796491	129796783	-	293	misc_RNA	-
ENSG00000124466	366.43155047696	153.075387666535	126.914912367485	124.16284050416	49.389921041504	78.8322016578502	105.919556805904	30.5813157431488	56.4699074670441	57.1371362563528	67.5640534556298	23.9259655577132	99.7198969739827	1281.46426817931	2841.81463807827	129.413460782943	632.585123709757	-2.2877	0.00504215696002649	0.254926	LYPD3	19	43460787	43465660	-	2519	protein_coding	LY6/PLAUR domain containing 3 [Source:HGNC Symbol;Acc:HGNC:24880]
ENSG00000150054	31.6669241152928	55.3676934112999	28.5049535798629	42.0890984759865	55.9752438470379	34.5444479174849	26.736975504403	19.4608372910947	670.580151171148	25.1057113853671	28.2357238322035	20.3813780676816	23.6958171027286	51.6379515960412	123.622705741336	36.7932717678078	134.751348413787	-1.87401	0.00504390175234645	0.254926	MPP7	10	28050993	28334486	-	6167	protein_coding	membrane palmitoylated protein 7 [Source:HGNC Symbol;Acc:HGNC:26542]
ENSG00000211734	6.33338482305856	8.14230785460293	11.537719306135	14.0296994919955	0	5.31453044884384	0	8.34035883904059	160.586299359407	7.79142767132083	33.2778173736684	17.722937450158	1.97465142522738	4.21534298743194	24.121503559285	6.71225009545955	35.6699971180712	-2.39026	0.00506819422321959	0.255272	TRBV5-1	7	142320677	142321544	+	652	TR_V_gene	T cell receptor beta variable 5-1 [Source:HGNC Symbol;Acc:HGNC:12218]
ENSG00000100191	56.0956941470901	19.541538851047	37.3279154022014	47.7009782727847	82.3165350691734	47.8307740395945	49.3605701619747	30.5813157431488	1.76468460834513	38.9571383566042	27.2273051239105	6.20302810755528	9.8732571261369	12.6460289622958	28.644285476651	46.3444152108768	17.9022468230713	1.37544	0.00507778666694102	0.255272	SLC5A4	22	32218476	32255341	-	2030	protein_coding	solute carrier family 5 member 4 [Source:HGNC Symbol;Acc:HGNC:11039]
ENSG00000218510	11.7620003856802	8.14230785460293	8.8229618223385	15.4326694411951	11.5243149096843	8.85755074807306	4.11338084683122	5.56023922602706	122.645580279986	6.92571348561852	8.06734966634386	20.3813780676816	12.835234263978	22.1305506840177	16.5835336970085	9.27692815430404	29.9384771635192	-1.68955	0.00508488996321833	0.255272	LINC00339	1	22024558	22031223	+	3764	processed_transcript	long intergenic non-protein coding RNA 339 [Source:HGNC Symbol;Acc:HGNC:25011]
ENSG00000162769	380.003089383514	464.111547712367	299.30201258856	203.430642633935	345.729447290528	377.331661867912	260.171338562075	262.721303429779	242.644133647455	140.245698083775	263.197282864468	218.878277509451	241.894799590354	158.075362028698	244.230223537761	324.100130433584	215.595111037423	0.589206	0.00510145018958919	0.255272	FLVCR1	1	212858255	212899363	+	6442	protein_coding	feline leukemia virus subgroup C cellular receptor 1 [Source:HGNC Symbol;Acc:HGNC:24682]
ENSG00000121577	654.148175295906	556.933857254841	349.525026038795	410.368710140869	268.351904325505	237.382360048358	254.001267291828	643.597690412632	97.057653458982	276.162825239038	435.636881982568	193.180018206722	159.946765443418	223.413178333893	176.388494777272	421.788623851092	223.112259634556	0.91863	0.0051043630855007	0.255272	POPDC2	3	119636457	119665324	-	2445	protein_coding	popeye domain containing 2 [Source:HGNC Symbol;Acc:HGNC:17648]
ENSG00000211659	443.336937614099	37.4546161311735	475.76124903533	1626.04217112228	265.059242922738	1.77151014961461	64.7857483375918	12.5105382585609	143.821795580128	8.65714185702315	40.3367483317193	7.08917498006318	0	0	1.50759397245531	365.840251696423	28.7732078173413	3.66677	0.00512711428023663	0.255872	IGLV3-25	22	22686726	22687271	+	380	IG_V_gene	immunoglobulin lambda variable 3-25 [Source:HGNC Symbol;Acc:HGNC:5908]
ENSG00000141644	1265.77219535128	1098.39732958594	1068.93575924486	1250.7477097114	1256.15032515559	1113.39412903278	1007.77830747365	1381.71944766772	2347.91287140319	1334.93127435297	1600.36049006096	1360.23544929962	1402.00251191144	1326.7792052942	1631.21667819665	1180.3619004029	1571.91978293129	-0.41383	0.00515958129680085	0.25624	MBD1	18	50266882	50281774	-	6734	protein_coding	methyl-CpG binding domain protein 1 [Source:HGNC Symbol;Acc:HGNC:6916]
ENSG00000139187	28.952616333982	73.2807706914264	57.6885965306748	85.5811669011726	102.072503485775	60.2313450868968	71.9841648195464	33.3614353561624	869.989511914148	94.3628462415523	140.170200452725	14.1783499601264	104.656525537051	65.337816305195	125.130299713791	64.1440749007046	201.975078589227	-1.65621	0.00516038997284874	0.25624	KLRG1	12	8950044	9010760	+	2598	protein_coding	killer cell lectin like receptor G1 [Source:HGNC Symbol;Acc:HGNC:6380]
ENSG00000171509	45.2384630218469	60.2530781240617	5.42951496759293	9.82078964439686	0	37.2017131419069	18.5102138107405	5.56023922602706	0	0	2.01683741658596	3.54458749003159	10.8605828387506	8.43068597486388	0	22.7517514920716	3.550384817176	2.6795	0.00517936149312196	0.25624	RXFP1	4	158315311	158653372	+	5684	protein_coding	relaxin family peptide receptor 1 [Source:HGNC Symbol;Acc:HGNC:19718]
ENSG00000180304	3908.60320508757	4996.93433036982	4109.4641410969	3520.05160254167	3291.01507206555	3985.01208155807	3867.60634123306	4399.53928759391	2410.55917499944	3752.00528083383	3485.09505586055	3154.68286612812	3256.20020019995	2908.58666132804	3046.84741833219	4009.77825769332	3144.8538082403	0.350635	0.00518442219136763	0.25624	OAZ2	15	64687573	64703281	-	7671	protein_coding	ornithine decarboxylase antizyme 2 [Source:HGNC Symbol;Acc:HGNC:8096]
ENSG00000271533	284.097547777198	264.625005274595	164.242827769686	231.490041617926	176.157385048031	378.21741694272	261.199683773783	262.721303429779	105.881076500708	180.934264811784	166.389086868342	147.986527708819	201.414445373193	202.336463396733	180.911276694638	252.843901454215	169.407591622031	0.580209	0.00518965741677082	0.25624	Z83843.1	X	74209976	74213660	-	3685	sense_intronic	novel transcript, sense intronic FTX
ENSG00000154678	206.287391379622	219.842312074279	238.21996920314	352.145457249087	151.462424527279	640.400919085682	331.127158169914	298.862858398955	1.76468460834513	64.9285639276736	217.818440991284	40.7627561353633	161.921416868645	92.7375457235026	162.820149025174	304.793561260995	106.107651039998	1.52451	0.00519906685024432	0.25624	PDE1C	7	31751179	32299329	-	13821	protein_coding	phosphodiesterase 1C [Source:HGNC Symbol;Acc:HGNC:8776]
ENSG00000163431	479.527708031577	960.792326843146	384.816873328149	589.948863638411	400.058360436183	979.645112736881	647.857483375918	1036.98461565405	1.76468460834513	186.9942641117	628.244855266528	104.565330955932	328.779462300359	91.6837099766447	183.926464639548	684.953918005539	217.99411026558	1.65185	0.00523178711105072	0.256879	LMOD1	1	201896452	201946588	-	3971	protein_coding	leiomodin 1 [Source:HGNC Symbol;Acc:HGNC:6647]
ENSG00000184678	153.810774274279	109.92115603714	157.455934060195	166.953423954747	156.401416631429	100.090323453226	123.401425404937	80.6234687773924	5042.5862683462	274.431396867634	231.936302907386	204.699927549324	161.921416868645	130.67563261039	226.139095868297	131.082240324168	896.055720145411	-0.600767	0.00523361031407545	0.256879	HIST2H2BE	1	149884459	149886652	-	2194	protein_coding	histone cluster 2 H2B family member e [Source:HGNC Symbol;Acc:HGNC:4760]
ENSG00000275481	0	0	1.35737874189823	2.8059398983991	0	3.54302029922922	0	2.78011961301353	13.2351345625885	12.1199985998324	4.03367483317193	0	10.8605828387506	10.5383574685798	6.03037588982126	1.31080731906751	8.11687488467778	-2.60099	0.00527934097669835	0.258243	AC025031.4	12	46388856	46392126	+	3271	lincRNA	novel transcript
ENSG00000188783	30.7621548548559	56.9961549822205	43.4361197407434	82.7752270027735	47.7435903401206	183.351300485112	169.676959931788	38.9216745821894	0	38.0914241709018	14.1178619161018	62.0302810755528	28.632445665797	18.9690434434437	6.03037588982126	81.7078977399755	23.9816331659455	1.76334	0.00528419959268548	0.258243	PRELP	1	203475828	203491352	+	5747	protein_coding	proline and arginine rich end leucine rich repeat protein [Source:HGNC Symbol;Acc:HGNC:9357]
ENSG00000267575	16.2858466878649	24.4269235638088	64.475490240166	42.0890984759865	49.389921041504	38.9732232915215	33.9353919863576	36.1415549691759	53.8228805545264	59.7342788134597	34.2862360819614	100.134596593392	77.0114055838678	96.9528887109346	67.8417287604892	38.2146812820482	69.9691450140902	-0.872849	0.00530064123040444	0.258243	AC006504.5	19	27793463	27918863	+	5141	lincRNA	uncharacterized LOC101927151 [Source:NCBI gene;Acc:101927151]
ENSG00000007237	582.671403721388	585.431934745951	987.493034730963	808.110690738941	857.738295420787	811.351648523492	954.304356464844	864.617199647208	2401.73575195772	1599.83981517788	654.463741682145	1254.78397147118	1458.28007753042	961.098201134482	892.495631693546	806.464820499197	1317.52817009248	-0.708711	0.00530479699618326	0.258243	GAS7	17	9910609	10198551	-	10100	protein_coding	growth arrest specific 7 [Source:HGNC Symbol;Acc:HGNC:4169]
ENSG00000216490	66.0481560118964	59.4388473386014	77.3705882881992	70.1484974599775	88.9018578747073	31.887182693063	61.7007127024684	48.6520932277368	565.581416974613	164.48569528344	91.7661024546614	120.515974661074	123.415714076711	34.7765796463135	36.1822553389275	63.0184919495813	162.38910549082	-1.3685	0.00534190068712539	0.259033	IFI30	19	18173162	18178117	+	2481	protein_coding	IFI30, lysosomal thiol reductase [Source:HGNC Symbol;Acc:HGNC:5398]
ENSG00000154451	588.100019284009	600.902319669696	405.856243827571	827.752270027735	1238.04068744037	248.011420946046	721.89833861888	237.700226912657	4362.30035182915	661.405637876568	1271.61599115745	1700.51584834266	1348.6869234303	284.535651651656	967.875330316312	608.53269084087	1513.8479620863	-1.31532	0.00534638823382966	0.259033	GBP5	1	89258950	89272804	-	8143	protein_coding	guanylate binding protein 5 [Source:HGNC Symbol;Acc:HGNC:19895]
ENSG00000066185	0	0	8.8229618223385	7.01484974599775	0	10.6290608976877	2.05669042341561	13.9005980650677	25.5879268210043	24.2399971996648	9.07576837463684	12.4060562151106	27.6451199531833	20.0228791903017	25.6290975317403	5.3030201193134	20.6581207550917	-1.95492	0.00535443207434374	0.259033	ZMYND12	1	42430329	42456267	-	2195	protein_coding	zinc finger MYND-type containing 12 [Source:HGNC Symbol;Acc:HGNC:21192]
ENSG00000181016	88.6673875228199	34.1976929893323	36.6492260312522	47.7009782727847	55.9752438470379	65.5458755357406	42.16215368002	65.332810905818	320.290256414641	65.7942781133759	83.6987527883175	178.115521374087	59.2395427568214	69.553159292627	54.2733830083913	54.5289210981007	118.709270535466	-1.12767	0.00536912220133426	0.259033	LSMEM1	7	112480853	112491062	+	2592	protein_coding	leucine rich single-pass membrane protein 1 [Source:HGNC Symbol;Acc:HGNC:22036]
ENSG00000269834	236.144776974041	190.530003797709	126.236222996536	115.745020808963	182.742707853565	168.293464213388	299.248456606972	94.52406684246	85.5872035047387	83.1085618274222	56.471447664407	59.3718404580292	151.060834029895	122.244946635526	138.698645465889	176.683090011704	99.5062113694152	0.831797	0.00538471589417983	0.259033	ZNF528-AS1	19	52388842	52397766	-	4160	processed_transcript	ZNF528 antisense RNA 1 [Source:HGNC Symbol;Acc:HGNC:51305]
ENSG00000277586	14.476308166991	4.88538471276176	8.14427245138939	9.82078964439686	13.1706456110677	7.97179567326576	0	0	50.2935113378361	5.19428511421389	4.03367483317193	0	15.797211401819	63.2301448114791	189.95684052937	7.30864953248406	46.9293811468414	-2.6765	0.0053863119714799	0.259033	NEFL	8	24950955	24957110	-	4329	protein_coding	neurofilament light [Source:HGNC Symbol;Acc:HGNC:7739]
ENSG00000143630	37.0955396779144	32.5692314184117	36.6492260312522	70.8499824345773	83.9628657705569	50.4880392640165	20.5669042341561	38.9216745821894	52.0581959461812	68.3914206704829	102.858708245884	97.4761559758688	102.681874111824	92.7375457235026	58.7961649257573	46.3879329266343	82.1428665142144	-0.834722	0.00544880454776655	0.260826	HCN3	1	155277583	155289848	+	4121	protein_coding	hyperpolarization activated cyclic nucleotide gated potassium channel 3 [Source:HGNC Symbol;Acc:HGNC:19183]
ENSG00000134326	222.573238067487	298.822698263928	251.115067251173	261.653895525716	271.644565728272	255.097461544504	355.807443250901	152.906578715744	303.525752635362	337.628532423903	382.19069044304	427.122792548807	941.90872983346	187.582762940721	676.909693632436	258.702618543466	465.266993493961	-0.845524	0.00545349682267191	0.260826	CMPK2	2	6840570	6866635	-	4302	protein_coding	cytidine/uridine monophosphate kinase 2 [Source:HGNC Symbol;Acc:HGNC:27015]
ENSG00000257365	275.049855172829	187.273080655867	211.751083736124	251.13162090672	242.01061310337	242.696890497202	265.313064620614	248.820705364711	124.410264888331	136.782841340966	132.102850786381	191.407724461706	202.401771085806	249.759072005342	156.789773135353	240.50586425718	170.522042529126	0.495704	0.00545647142484426	0.260826	FNTB	14	64986720	65062652	+	3948	protein_coding	farnesyltransferase, CAAX box, beta [Source:HGNC Symbol;Acc:HGNC:3785]
ENSG00000197863	105.858003471122	179.130772801265	127.593601738434	117.147990758162	110.304156992692	181.579790335498	134.713222733723	105.644545294514	80.2931496797033	53.6742795135435	106.892383079056	124.060562151106	64.1761713198898	85.3606954954968	94.9784202646848	132.746510515676	87.06223735764	0.613642	0.00550390213606499	0.262022	ZNF790	19	36817428	36850787	-	3851	protein_coding	zinc finger protein 790 [Source:HGNC Symbol;Acc:HGNC:33114]
ENSG00000125249	1773.3477504564	2160.15427382616	1876.57611067431	2089.02225435813	1922.91425921589	1921.20275725705	1687.51449241251	2388.12274757862	907.047888689395	792.128479917618	1957.34071279668	1076.6684500971	1568.86055734315	995.874780780796	1893.53802940388	1977.35683072238	1313.06555700409	0.591194	0.00551661445434716	0.262022	RAP2A	13	97434222	97469128	+	5570	protein_coding	RAP2A, member of RAS oncogene family [Source:HGNC Symbol;Acc:HGNC:9861]
ENSG00000213085	87.7626182623829	103.407309753457	55.6525284178275	42.7905834505863	110.304156992692	72.6319161341991	116.203008922982	107.034605101021	28.234953733522	40.6885667280088	102.858708245884	21.2675249401895	41.467679929775	23.1843864308757	49.7506010910254	86.9733408793936	43.9217744427544	0.984028	0.00551923566988307	0.262022	CFAP45	1	159872364	159900163	-	2625	protein_coding	cilia and flagella associated protein 45 [Source:HGNC Symbol;Acc:HGNC:17229]
ENSG00000158470	1075.77065065952	1385.82079685342	1372.98859743006	1247.2402848384	1336.82052952338	1199.31237128909	1116.78289991468	935.510249779053	1409.10065976358	2125.32832589918	1779.85902013711	1803.30888555357	1811.74268264612	1392.1170215994	1106.5739757822	1208.78079753595	1632.5757959116	-0.433885	0.00552551198407173	0.262022	B4GALT5	20	49632945	49713878	-	4722	protein_coding	beta-1,4-galactosyltransferase 5 [Source:HGNC Symbol;Acc:HGNC:928]
ENSG00000148344	491.289708417257	109.92115603714	376.672600876759	271.474685170113	330.912470978077	195.751871532415	180.988757260574	152.906578715744	14.9998191709336	648.419925091034	211.767928741526	1567.59381746647	458.119130652752	2203.57054668005	723.645106778551	263.73972862351	832.588039225902	-1.65836	0.0055672640949614	0.262611	PTGES	9	129738331	129753047	-	1896	protein_coding	prostaglandin E synthase [Source:HGNC Symbol;Acc:HGNC:9599]
ENSG00000180785	730.148793172609	795.503477394707	770.312436027246	651.679541403191	444.509289373536	893.726870480572	503.889153736825	1185.72101495027	0	206.039976197151	600.009131434324	194.952311951738	196.477816810124	208.659477877881	260.813757234769	746.93632206737	238.136067357998	1.6495	0.00558537525882036	0.262611	OR51E1	11	4643420	4655488	+	3612	protein_coding	olfactory receptor family 51 subfamily E member 1 [Source:HGNC Symbol;Acc:HGNC:15194]
ENSG00000102924	66.9529252723334	65.1384628368235	5.42951496759293	9.82078964439686	0	4.42877537403653	41.1338084683122	13.9005980650677	0	1.73142837140463	0	3.54458749003159	5.92395427568214	12.6460289622958	7.53796986227657	25.8506093285704	4.48342413738439	2.54956	0.00558853689422636	0.262611	CBLN1	16	49277917	49281831	-	2594	protein_coding	cerebellin 1 precursor [Source:HGNC Symbol;Acc:HGNC:1543]
ENSG00000250722	126.667696461171	149.004233739234	62.4394221273187	169.057878878546	245.303274506137	263.955012292577	304.390182665511	84.7936481969127	22.0585576043141	48.4799943993296	68.5724721639228	23.0398186852053	153.035485455122	87.4683669892127	123.622705741336	175.701418608426	75.1824858626346	1.22788	0.00558946653273519	0.262611	SELENOP	5	42799880	42887392	-	5688	protein_coding	selenoprotein P [Source:HGNC Symbol;Acc:HGNC:10751]
ENSG00000240891	42.5241552405361	3.25692314184117	40.7213622569469	55.4173129933823	46.0972596387371	29.2299174686411	10.2834521170781	11.1204784520541	680.285916517046	13.851426971237	66.5556347473368	17.722937450158	19.7465142522738	14.7537004560118	126.637893686246	29.8313576636521	134.222003440044	-2.1693	0.00559309273744636	0.262611	PLCXD2	3	111674676	111846447	+	8974	protein_coding	phosphatidylinositol specific phospholipase C X domain containing 2 [Source:HGNC Symbol;Acc:HGNC:26462]
ENSG00000163219	559.147402950027	632.657320302648	626.430289386034	778.648321805751	834.689665601418	408.333089486168	533.711164876351	489.301051890381	3266.43121004683	1402.45698083775	696.817327430451	873.740816292787	939.934078408233	503.733486998117	685.955257467168	607.864788287347	1195.58130821162	-0.976373	0.00561601606909803	0.263168	ARHGAP25	2	68679601	68826833	+	5452	protein_coding	Rho GTPase activating protein 25 [Source:HGNC Symbol;Acc:HGNC:28951]
ENSG00000025423	18.0953852087388	46.4111547712367	19.0033023865752	42.7905834505863	23.0486298193686	143.492322118784	35.9920824097732	18.0707774845879	18.5291883876238	15.5828553426417	4.03367483317193	5.31688123504739	19.7465142522738	33.7227438994555	9.04556383473189	43.3630297062063	15.1396316835637	1.52034	0.00565269363222705	0.264286	HSD17B6	12	56752161	56787790	+	2272	protein_coding	hydroxysteroid 17-beta dehydrogenase 6 [Source:HGNC Symbol;Acc:HGNC:23316]
ENSG00000262074	0	0	4.07213622569469	4.20890984759865	1.64633070138347	3.54302029922922	0	4.1701794195203	44.1171152086282	12.1199985998324	19.1599554575667	5.31688123504739	1.97465142522738	4.21534298743194	1.50759397245531	2.20507206167829	12.6302198408842	-2.51566	0.00566207754328797	0.264286	SNORD3B-2	17	19063346	19064136	-	791	snoRNA	small nucleolar RNA, C/D box 3B-2 [Source:HGNC Symbol;Acc:HGNC:33190]
ENSG00000273064	9.04769260436938	5.69961549822205	4.75082559664381	11.2237595935964	11.5243149096843	18.6008565709534	24.6802850809873	13.9005980650677	7.05873843338051	6.0599992999162	3.02525612487895	6.20302810755528	3.94930285045476	4.21534298743194	1.50759397245531	12.4284934899405	4.57418025372471	1.39141	0.00569648437610772	0.265348	AC017083.1	2	68252870	68253848	+	979	antisense	novel transcript
ENSG00000160932	3222.78810567637	3440.9392993552	4225.52002352919	3065.48933900102	4012.10791927151	3885.80751317965	3841.89771094036	3623.88591556314	4214.94918703234	8162.81905698713	3196.68730528875	4667.3355774991	11604.0391003487	6704.5030215105	3591.08884238856	3664.80447831456	6020.20315586501	-0.716164	0.00570712990347968	0.265348	LY6E	8	143017982	143023832	+	2640	protein_coding	lymphocyte antigen 6 family member E [Source:HGNC Symbol;Acc:HGNC:6727]
ENSG00000166439	152.001235753406	116.435002320822	176.45923644677	136.088085072356	134.999117513444	96.5473031539964	57.5873318556371	176.537595426359	743.814562417471	120.334271812622	263.197282864468	223.30901187199	154.022811167736	151.75234754755	221.616313950931	130.831863442849	268.292371661824	-1.03703	0.00577763772206699	0.267867	RNF169	11	74748868	74842413	+	7823	protein_coding	ring finger protein 169 [Source:HGNC Symbol;Acc:HGNC:26961]
ENSG00000138036	380.003089383514	394.901930948242	326.449587426525	362.667731868084	344.083116589145	567.769002951483	476.123833020714	432.308599823604	74.1167535504953	187.859978297402	336.811848569856	274.705530477448	262.628639555241	300.343187854526	298.503606546152	410.538361501414	247.852792121589	0.729503	0.00578897828920759	0.267867	DYNC2LI1	2	43774039	43810010	+	4618	protein_coding	dynein cytoplasmic 2 light intermediate chain 1 [Source:HGNC Symbol;Acc:HGNC:24595]
ENSG00000276984	0	7.32807706914264	0.678689370949116	5.6118797967982	0	7.97179567326576	8.22676169366245	13.9005980650677	1.76468460834513	0	0	0.886146872507898	0	0	0	5.46472520861073	0.378690211550432	3.63717	0.00580250002473593	0.267867	AL023881.1	16	424243	424543	-	301	lincRNA	novel transcript
ENSG00000041353	164.668005399523	58.6246165531411	245.68555228358	176.072728624544	125.121133305144	58.4598349372822	86.3809977834557	95.9141266489668	346.760525539817	119.468557626919	62.5219599141649	457.251786214075	265.590616693082	458.418549883223	259.306163262314	126.365874441954	281.331165590514	-1.15294	0.00580631948527675	0.267867	RAB27B	18	54717860	54895516	+	7432	protein_coding	RAB27B, member RAS oncogene family [Source:HGNC Symbol;Acc:HGNC:9767]
ENSG00000126709	1491.96451046051	2761.05659349585	1866.39577011007	1728.45897741385	2665.40940553984	1937.14634860358	2464.94347246361	1434.54172031498	1172.63292224534	5744.01362213486	2215.49590211968	2197.64424381959	16201.027618278	2465.97564764768	3500.63320404124	2043.73959980029	4785.3461657552	-1.22745	0.00584071670991598	0.26842	IFI6	1	27666061	27672218	-	865	protein_coding	interferon alpha inducible protein 6 [Source:HGNC Symbol;Acc:HGNC:4054]
ENSG00000121966	1635.82282286998	2580.29735912367	1458.50345816965	1769.14510594063	1959.13353464633	1346.34771370711	1521.95091332755	1308.04627792287	19757.408875032	4300.8680745691	2059.19100233427	2104.59882220626	2037.84027083466	1005.35930250252	1180.44608043251	1697.40589821347	4635.10177541591	-1.44933	0.00584563531392015	0.26842	CXCR4	2	136114349	136118165	-	2224	protein_coding	C-X-C motif chemokine receptor 4 [Source:HGNC Symbol;Acc:HGNC:2561]
ENSG00000154447	447.860783916284	447.826932003161	469.653044696788	434.219199277261	281.522549936573	419.847905458663	441.160095822649	479.570633244834	89.1165727214289	174.874265511868	481.015723855753	296.859202290146	251.768056716491	231.843864308757	251.768193400038	427.707643044527	253.89226840064	0.753688	0.00586308381440965	0.26842	SH3RF1	4	169094256	169271105	-	5624	protein_coding	SH3 domain containing ring finger 1 [Source:HGNC Symbol;Acc:HGNC:17650]
ENSG00000116017	640.576636389352	413.629239013829	593.174510209527	542.949370340226	620.666674421568	355.18778499773	750.692004546698	479.570633244834	1060.57544961542	838.877045945543	602.02596885091	1034.13340021672	861.935347111751	618.601583405637	628.666686513866	549.55585664547	806.402211665692	-0.55436	0.00586339803688229	0.26842	ARID3A	19	925781	975934	+	7210	protein_coding	AT-rich interaction domain 3A [Source:HGNC Symbol;Acc:HGNC:3031]
ENSG00000131095	0	0	2.71475748379646	5.6118797967982	0	7.08604059845845	12.3401425404937	8.34035883904059	7.05873843338051	41.5542809137111	12.1010244995158	14.1783499601264	7.89860570090952	28.4535651651656	18.0911276694638	4.51164740732342	18.4765274774675	-2.03708	0.00587493483918006	0.268432	GFAP	17	44903161	44916937	-	12110	protein_coding	glial fibrillary acidic protein [Source:HGNC Symbol;Acc:HGNC:4235]
ENSG00000272512	114.905696075491	84.6800016878705	72.6197626915554	85.5811669011726	70.7922201594891	32.7729377678703	141.911639215677	122.325262972595	5.29405382503538	85.7057043845292	51.4293541229421	44.3073436253949	37.5183770793202	33.7227438994555	18.0911276694638	90.6985859339652	39.4383863723059	1.19541	0.00589638439292854	0.268822	AL645608.7	1	995966	998051	-	2086	lincRNA	novel transcript
ENSG00000114784	944.579107896163	920.080787570131	811.033798284193	881.766613071918	846.213980511103	876.897524059233	984.12636760437	996.672881265351	1237.04391044993	1014.61702564311	1122.37002233009	1070.46542198954	963.629895510961	977.95957308421	1210.59795988162	907.671382532808	1085.24054412707	-0.257688	0.00590606865399508	0.268822	EIF1B	3	40309684	40312424	+	1912	protein_coding	eukaryotic translation initiation factor 1B [Source:HGNC Symbol;Acc:HGNC:30792]
ENSG00000127418	177.33477504564	162.846157092059	235.505211719343	297.429629230305	263.412912221355	248.897176020853	213.895804035224	243.260466138684	519.69961715764	252.788542225076	207.734253908354	315.468286612812	359.386559391383	630.193776621075	292.473230656331	230.322766437933	368.249180938953	-0.677914	0.00596095018018002	0.270802	FGFRL1	4	1009936	1026897	+	4145	protein_coding	fibroblast growth factor receptor like 1 [Source:HGNC Symbol;Acc:HGNC:3693]
ENSG00000270083	0	0	7.46558308044027	0	3.29266140276694	5.31453044884384	5.14172605853903	0	57.3522497712166	12.9857127855347	8.06734966634386	1.7722937450158	10.8605828387506	10.5383574685798	9.04556383473189	2.65181262382376	15.8031585871676	-2.56618	0.0059793086289274	0.271119	AL021878.2	22	42089630	42090028	-	399	sense_intronic	novel transcript, sense intronic to NDUFA6
ENSG00000127124	716.577254266055	615.558473807982	569.420382226308	525.412245975232	622.313005122951	368.474111119839	395.912906507505	568.534460861267	656.462674304387	716.811345761517	859.172739465621	777.150807189426	656.571598888104	820.93804680237	698.016009246811	547.775354985892	740.731888808319	-0.435975	0.00600984589023007	0.271425	HIVEP3	1	41506365	42035925	-	14410	protein_coding	human immunodeficiency virus type I enhancer binding protein 3 [Source:HGNC Symbol;Acc:HGNC:13561]
ENSG00000211897	359.193396393464	119.691925462663	12046.7363343468	23164.4368312338	7928.72865786278	1364.94857027806	2882.45162841698	386.436626208881	1203.51490289138	1559.15124844987	2761.05042330619	434.21196752887	178.705953983078	36.8842511400295	119.09992382397	6031.57799627543	898.945524446197	2.74617	0.00601416816088092	0.271425	IGHG3	14	105764503	105771405	-	2894	IG_C_gene	immunoglobulin heavy constant gamma 3 (G3m marker) [Source:HGNC Symbol;Acc:HGNC:5527]
ENSG00000259426	25.3335392922343	91.1938479715528	19.0033023865752	35.0742487299888	46.0972596387371	28.3441623938338	27.7653207161108	136.225861037663	0	17.3142837140463	17.1431180409807	7.97532185257108	35.5437256540928	17.9152076965857	0	51.129692770837	13.6988081368967	1.89045	0.00602421982861846	0.271425	AC027237.3	15	69396904	69415029	-	2265	antisense	uncharacterized LOC145694 [Source:NCBI gene;Acc:145694]
ENSG00000181631	94.0960030854415	80.608847760569	105.196852497113	106.625716139166	265.059242922738	54.916814638053	105.919556805904	50.0421530342436	772.049516150993	849.265616173971	63.5303786224579	315.468286612812	110.580479812733	43.2072656211774	107.039172044327	107.808148360404	323.020102148353	-1.58635	0.00604441742244175	0.271425	P2RY13	3	151326312	151329548	-	2764	protein_coding	purinergic receptor P2Y13 [Source:HGNC Symbol;Acc:HGNC:4537]
ENSG00000107282	161.048928357775	118.877694677203	89.5869969652833	193.609852989538	118.53581049961	168.293464213388	117.23135413469	162.636997361292	29.1172960376946	43.2857092851157	153.279643660533	83.2978060157424	109.59315410012	53.7456230897572	25.6290975317403	141.227637399847	71.1354756743862	0.98691	0.00604788110089144	0.271425	APBA1	9	69427530	69672306	-	11384	protein_coding	amyloid beta precursor protein binding family A member 1 [Source:HGNC Symbol;Acc:HGNC:578]
ENSG00000151640	53.3813863657793	70.0238475495852	25.1115067251173	84.178196951973	41.1582675345867	41.6304885159434	40.1054632566044	109.814724714034	438.524125173764	98.6914171700639	127.060757244916	234.828921214593	135.263622628075	26.3458936714496	25.6290975317403	58.175485201703	155.191976376372	-1.41878	0.00605964916216038	0.271425	DPYSL4	10	132186900	132205776	+	3176	protein_coding	dihydropyrimidinase like 4 [Source:HGNC Symbol;Acc:HGNC:3016]
ENSG00000204282	194.525390993942	61.067308909522	99.0886481585709	185.192033294341	218.961983284001	95.6615480791891	115.174663711274	61.1626314862977	1154.10373385771	209.50283293996	240.00365257373	155.96184956139	167.845371144327	96.9528887109346	232.169471758118	128.854275989642	322.362828649453	-1.32439	0.00606586430498093	0.271425	TNRC6C-AS1	17	78107398	78111799	-	4402	processed_transcript	TNRC6C antisense RNA 1 [Source:HGNC Symbol;Acc:HGNC:44360]
ENSG00000233261	5.42861556262163	4.88538471276176	8.8229618223385	2.8059398983991	9.87798420830081	0	14.3968329639093	8.34035883904059	160.586299359407	12.1199985998324	19.1599554575667	18.6090843226659	13.8225599765917	8.43068597486388	0	6.81975975092146	33.2469405272753	-2.30301	0.00617967703843063	0.275999	FAM238A	10	26589865	26594330	+	1091	transcribed_unprocessed_pseudogene	family with sequence similarity 238 member A [Source:HGNC Symbol;Acc:HGNC:17776]
ENSG00000172508	53.3813863657793	21.1700004219676	31.8984004346084	50.5069181711838	46.0972596387371	8.85755074807306	28.7936659278186	2.78011961301353	528.523040199365	55.4057078849481	27.2273051239105	16.8367905776501	27.6451199531833	33.7227438994555	114.577141906604	30.4356626651477	114.848264220731	-1.91534	0.00624423038314292	0.277481	CARNS1	11	67414968	67425607	+	5670	protein_coding	carnosine synthase 1 [Source:HGNC Symbol;Acc:HGNC:29268]
ENSG00000006047	28.0478470735451	34.1976929893323	5.42951496759293	0	0	3.54302029922922	34.9637371980654	0	1.76468460834513	0	0	0	3.94930285045476	0	0	13.2727265659706	0.816283922685698	4.00166	0.00624691371625251	0.277481	YBX2	17	7288252	7294615	-	4618	protein_coding	Y-box binding protein 2 [Source:HGNC Symbol;Acc:HGNC:17948]
ENSG00000176912	27.1430778131081	26.8696159201897	19.0033023865752	11.2237595935964	11.5243149096843	7.08604059845845	14.3968329639093	15.2906578715744	0.882342304172563	12.1199985998324	5.04209354146491	11.5199093426027	4.93662856306845	7.37685022800589	3.01518794491063	16.567200257137	6.4132872177225	1.35483	0.00626676885441132	0.277481	TYMSOS	18	641320	658340	-	976	bidirectional_promoter_lncRNA	TYMS opposite strand [Source:HGNC Symbol;Acc:HGNC:29553]
ENSG00000107736	157.429851316027	464.111547712367	350.882404780693	293.220719382706	154.755085930046	137.292036595132	427.791608070447	353.075190852718	1318.21940243381	451.902804936608	195.633229408839	1348.71553995702	537.105187661847	449.987863908359	265.336539152135	292.319805580017	652.414366779803	-1.15822	0.00627399322975519	0.277481	CDH23	10	71396934	71815947	+	18587	protein_coding	cadherin related 23 [Source:HGNC Symbol;Acc:HGNC:13733]
ENSG00000116667	778.101563975766	1143.18002278625	1100.83415967947	1056.43637174726	841.274988406952	969.016051839193	972.814570275585	852.106661388647	614.992586008277	806.845621074557	825.894922091952	617.644370138005	749.38021587379	849.391611967536	821.638714988146	964.22054876239	755.112577448895	0.354781	0.00630686816599432	0.277481	C1orf21	1	184387058	184629020	+	11013	protein_coding	chromosome 1 open reading frame 21 [Source:HGNC Symbol;Acc:HGNC:15494]
ENSG00000100226	1119.19957516049	976.262711766892	1116.4440152113	1016.45172819507	1160.66314447535	825.523729720409	889.518608127252	1139.84904133555	1948.21180761302	1659.57409399134	1219.17821832622	1541.89555816374	1172.94294658506	1050.67423961741	1156.32457687323	1030.48906924904	1392.68592016715	-0.435591	0.00631323863006153	0.277481	GTPBP1	22	38705723	38738299	+	8166	protein_coding	GTP binding protein 1 [Source:HGNC Symbol;Acc:HGNC:4669]
ENSG00000078328	36.1907704174775	21.1700004219676	2.03606811284735	14.0296994919955	0	0.885755074807306	31.878701562942	8.34035883904059	1.76468460834513	0.865714185702315	8.06734966634386	0.886146872507898	1.97465142522738	2.10767149371597	4.52278191736594	14.3164192401347	2.8841428813155	2.34251	0.00631805212279064	0.277481	RBFOX1	16	5239802	7713338	+	10121	protein_coding	RNA binding fox-1 homolog 1 [Source:HGNC Symbol;Acc:HGNC:18222]
ENSG00000272398	208.096929900496	71.6523091205058	16.9672342737279	110.834625986765	77.377542965023	14.1720811969169	116.203008922982	20.8508970976015	260.290979730906	35.4942816137949	44.3704231648912	7.97532185257108	43.4423313550023	671.293370748536	2308.12637182909	79.5193286830022	481.570440042113	-2.5975	0.00632203217499103	0.277481	CD24	6	106969831	106975627	-	3097	protein_coding	CD24 molecule [Source:HGNC Symbol;Acc:HGNC:1645]
ENSG00000125207	9.04769260436938	9.77076942552352	12.2164086770841	1.40296994919955	19.7559684166016	3.54302029922922	0	5.56023922602706	0	0	0	0	0	0	6.03037588982126	7.6621335747543	0.861482269974465	3.4688	0.00632408478654674	0.277481	PIWIL1	12	130337887	130372637	+	5280	protein_coding	piwi like RNA-mediated gene silencing 1 [Source:HGNC Symbol;Acc:HGNC:9007]
ENSG00000254054	5.42861556262163	27.68384670565	16.2885449027788	11.2237595935964	13.1706456110677	3.54302029922922	8.22676169366245	8.34035883904059	0	60.599992999162	7.05893095805088	1.7722937450158	3.94930285045476	0	0	11.7381941509558	10.4829315075262	2.03165	0.00633569482855577	0.277481	AC087273.2	8	17905756	17907887	+	634	lincRNA	novel transcript
ENSG00000263370	0	0	0	1.40296994919955	0	0	0	0	7.05873843338051	15.5828553426417	4.03367483317193	0	3.94930285045476	3.16150724057395	0	0.175371243649944	4.8265826714604	-4.05898	0.00634109245439358	0.277481	AC104564.1	17	29639627	29640825	+	270	antisense	novel transcript, antisense to SSH2
ENSG00000106384	2.71430778131081	34.1976929893323	0	5.6118797967982	13.1706456110677	0	49.3605701619747	0	0	0	0	0	3.94930285045476	0	0	13.1318870425605	0.564186121493537	4.49461	0.00643172242577034	0.280931	MOGAT3	7	101195007	101201038	-	2436	protein_coding	monoacylglycerol O-acyltransferase 3 [Source:HGNC Symbol;Acc:HGNC:23249]
ENSG00000185880	524.766171053424	766.191169118136	747.236997414976	748.48446789796	707.922201594891	775.035690456393	790.797467803303	653.32810905818	1013.81130749428	945.359890786928	807.743385342679	828.547325794884	1040.64130109483	816.722703814938	817.11593307078	714.220284299658	895.705978199902	-0.326635	0.00646610319688784	0.281625	TRIM69	15	44728988	44767829	+	9265	protein_coding	tripartite motif containing 69 [Source:HGNC Symbol;Acc:HGNC:17857]
ENSG00000103249	1273.91511869521	1222.97463976136	1510.76253973273	1293.53829316199	1182.06544359333	1102.7650681351	1457.16516498996	1317.77669656841	3379.37102498092	2679.38540474866	1797.00213817809	3982.34404505049	1684.37766571895	1085.45081926372	916.617135252831	1295.12037057976	2217.79260474195	-0.776293	0.00647794660771775	0.281625	CLCN7	16	1444934	1475580	-	8119	protein_coding	chloride voltage-gated channel 7 [Source:HGNC Symbol;Acc:HGNC:2025]
ENSG00000131016	1080.2944969617	758.863092048993	429.61037181079	571.710254298817	421.460659554168	620.914307439922	518.285986700734	1016.13371855645	25.5879268210043	283.088538724657	404.375902025486	634.481160715655	262.628639555241	188.636598687579	309.056764353339	677.159110921447	301.122218697566	1.16909	0.00648701867190913	0.281625	AKAP12	6	151239999	151358557	+	8741	protein_coding	A-kinase anchoring protein 12 [Source:HGNC Symbol;Acc:HGNC:370]
ENSG00000250608	2.71430778131081	4.88538471276176	2.03606811284735	11.2237595935964	0	2.65726522442192	0	1.39005980650677	24.7055845168318	12.1199985998324	9.07576837463684	3.54458749003159	9.8732571261369	11.5921932154378	12.0607517796425	3.11335565393063	11.85316301465	-1.842	0.00650148462489124	0.281625	AC010210.1	3	131325092	131381475	-	4200	processed_transcript	uncharacterized LOC339874 [Source:NCBI gene;Acc:339874]
ENSG00000125637	651.433867514595	578.918088462269	654.935242965897	889.482947792515	1210.05306551685	359.616560371766	810.336026825751	400.337224273948	7521.9681430711	1185.16272022647	837.995946591468	1196.29827788566	731.608353046744	353.034975197425	1049.2854048289	694.389127965449	1839.33626012111	-1.40568	0.00650677741213354	0.281625	PSD4	2	113157325	113209396	+	13442	protein_coding	pleckstrin and Sec7 domain containing 4 [Source:HGNC Symbol;Acc:HGNC:19096]
ENSG00000248441	118.524773117239	302.893852191229	264.688854670155	241.310831262323	162.986739436963	435.791496805195	354.779098039193	197.388492523961	0	105.617130655682	168.405924284928	62.9164279480607	98.732571261369	104.32973893894	111.561953961693	259.795517255782	93.0805352929534	1.48233	0.00653194027884877	0.281766	LINC01197	15	95209099	95327129	-	6992	lincRNA	long intergenic non-protein coding RNA 1197 [Source:HGNC Symbol;Acc:HGNC:49597]
ENSG00000144290	2.71430778131081	0	8.14427245138939	14.0296994919955	42.8045982359702	0	7.19841648195464	4.1701794195203	184.409541572066	22.5085688282602	27.2273051239105	10.6337624700948	13.8225599765917	31.6150724057395	45.2278191736594	9.8826842327676	47.9206613643317	-2.30838	0.00653370284746241	0.281766	SLC4A10	2	161424332	161985282	+	7550	protein_coding	solute carrier family 4 member 10 [Source:HGNC Symbol;Acc:HGNC:13811]
ENSG00000160183	21.7144622504865	3.25692314184117	2.71475748379646	7.01484974599775	6.58532280553387	15.9435913465315	12.3401425404937	0	50.2935113378361	32.897139056688	18.1515367492737	25.698259302729	17.7718628270464	12.6460289622958	18.0911276694638	8.69625616433512	25.0784951293333	-1.52228	0.00656038074968635	0.282405	TMPRSS3	21	42371837	42396846	-	5713	protein_coding	transmembrane serine protease 3 [Source:HGNC Symbol;Acc:HGNC:11877]
ENSG00000225791	130.286773502919	225.541927572501	199.53467505904	171.863818776945	258.473920117205	256.868971694119	211.839113611808	90.3538874229397	83.8225188963935	92.6314178701477	164.372249451756	134.6943246212	103.669199824437	134.890975597822	140.206239438344	193.095385969685	122.040989385729	0.664196	0.00659260962356253	0.28283	TRAM2-AS1	6	52577307	52583993	+	2546	lincRNA	TRAM2 antisense RNA 1 (head to head) [Source:HGNC Symbol;Acc:HGNC:48663]
ENSG00000211679	833.29248886242	175.059618873963	5033.83906432959	23029.050231136	5230.39263829528	1102.7650681351	1868.50324967308	500.421530342436	1967.62333830482	231.145687582518	2522.05518944075	386.360036413443	165.8707197191	67.445487798911	143.221427383255	4721.66548620599	783.38884094897	2.59144	0.00660415475666064	0.28283	IGLC3	22	22906342	22906803	+	462	IG_C_gene	immunoglobulin lambda constant 3 (Kern-Oz+ marker) [Source:HGNC Symbol;Acc:HGNC:5857]
ENSG00000115468	325.716933757298	341.976929893323	403.141486343775	339.518727706291	347.375777991912	633.314878487224	398.997942142629	561.584161828733	18.5291883876238	206.905690382853	481.015723855753	64.6887216930765	190.553862534442	83.2530240017808	194.479622446736	418.953354768898	177.060833328895	1.24303	0.00661259056939302	0.28283	EFHD1	2	232606057	232682781	+	3052	protein_coding	EF-hand domain family member D1 [Source:HGNC Symbol;Acc:HGNC:29556]
ENSG00000241511	0	0	0	0	1.64633070138347	0	0	1.39005980650677	17.6468460834513	0.865714185702315	7.05893095805088	0	0.98732571261369	0	7.53796986227657	0.379548813486279	4.87096954315639	-4.06009	0.00661777368417273	0.28283	RPS15AP24	8	30117384	30117779	-	396	processed_pseudogene	ribosomal protein S15a pseudogene 24 [Source:HGNC Symbol;Acc:HGNC:36174]
ENSG00000168827	1235.01004049642	1233.55963997234	1202.63756532183	1045.91409712827	865.969948927704	1119.59441455643	1017.03341437902	1163.48005804616	744.696904721644	820.697048045794	1189.93407578572	891.463753742945	858.97336997391	782.999959915483	783.948865676764	1110.39989735352	867.530568266037	0.35674	0.00665735000686883	0.284011	GFM1	3	158644278	158692575	+	9032	protein_coding	G elongation factor mitochondrial 1 [Source:HGNC Symbol;Acc:HGNC:13780]
ENSG00000204267	959.960185323591	1113.05348372422	1163.95227117773	1232.50910037181	1106.33423132969	995.588704083412	1248.41108701328	1085.63670888178	2197.03233738968	1595.51124424937	1249.43077957501	1183.89222167055	1356.58552913121	1219.28795911469	1524.17750615232	1113.18072148819	1475.13108246898	-0.406164	0.00667469491170289	0.284242	TAP2	6	32821833	32838780	-	6390	protein_coding	transporter 2, ATP binding cassette subfamily B member [Source:HGNC Symbol;Acc:HGNC:44]
ENSG00000278196	9.95246186480631	0	159.492002173042	328.294968112695	156.401416631429	14.1720811969169	85.3526525717479	9.73041864554736	73.2344112463228	1.73142837140463	2.01683741658596	2.65844061752369	7.89860570090952	3.16150724057395	0	95.4245001495231	12.9573186561886	2.87427	0.00673587075971121	0.286335	IGLV2-8	22	22822658	22823289	+	517	IG_V_gene	immunoglobulin lambda variable 2-8 [Source:HGNC Symbol;Acc:HGNC:5895]
ENSG00000211785	0	5.69961549822205	8.14427245138939	4.20890984759865	0	0	0	0	104.998734196535	0.865714185702315	6.05051224975789	1.7722937450158	3.94930285045476	15.8075362028698	13.5683457520978	2.25659972465126	21.0017770260619	-3.15738	0.00674801789748425	0.28634	TRAV12-1	14	21841240	21841774	+	340	TR_V_gene	T cell receptor alpha variable 12-1 [Source:HGNC Symbol;Acc:HGNC:12105]
ENSG00000244575	17.1906159483018	17.0988464946662	10.8590299351859	21.746034212593	19.7559684166016	0	0	9.73041864554736	82.940176592221	0	0	2.65844061752369	0	1.05383574685798	0	12.047614206612	12.3789218509432	3.04608	0.00680863862957828	0.287678	IGKV1-27	2	89213423	89213928	-	382	IG_V_gene	immunoglobulin kappa variable 1-27 [Source:HGNC Symbol;Acc:HGNC:5735]
ENSG00000275496	2.71430778131081	0	8.8229618223385	22.4475191871928	13.1706456110677	0	40.1054632566044	20.8508970976015	1.76468460834513	4.32857092851157	3.02525612487895	0	0	0	3.01518794491063	13.5139743445145	1.73338565809233	2.9694	0.00681065976037567	0.287678	CU633906.1	21	6228966	6267317	-	2878	lincRNA	uncharacterized LOC102724701 [Source:NCBI gene;Acc:102724701]
ENSG00000163923	234.335238453167	186.458849870407	198.855985688091	195.012822938738	212.376660478467	184.23705555992	150.13840090934	287.7423799469	66.1756728129423	153.23141086931	149.245968827361	103.679184083424	134.276296915462	171.775226737851	179.403682722182	206.144674230629	136.826777566933	0.593316	0.00681582135226282	0.287678	RPL39L	3	187120948	187180908	-	1060	protein_coding	ribosomal protein L39 like [Source:HGNC Symbol;Acc:HGNC:17094]
ENSG00000187486	5.42861556262163	4.88538471276176	2.71475748379646	2.8059398983991	0	3.54302029922922	0	2.78011961301353	0	0	0	0	0	0	0	2.76972969622771	0	3.91805	0.00683882863271759	1	KCNJ11	11	17385859	17389331	-	3204	protein_coding	potassium voltage-gated channel subfamily J member 11 [Source:HGNC Symbol;Acc:HGNC:6257]
ENSG00000130150	362.812473435212	425.028470010273	350.882404780693	413.174650039268	235.425290297836	328.615132753511	346.552336345531	425.35830079107	740.285193200781	400.825667980172	515.301959937714	809.052094599711	374.196445080588	401.511419552892	499.013604882709	360.981132306674	534.312340747795	-0.564991	0.00685354153958905	0.288759	MOSPD2	X	14873441	14922327	+	5656	protein_coding	motile sperm domain containing 2 [Source:HGNC Symbol;Acc:HGNC:28381]
ENSG00000081923	1263.05788756996	1497.37041446148	1080.47347855099	1337.73184656177	826.458012094501	931.814338697286	824.73285978966	1566.59740193312	70.5873843338051	413.811380765706	1267.58231632428	444.845729998965	468.979713491503	494.248965276395	762.842550062389	1166.02952995735	560.414005750435	1.05758	0.00686833374283412	0.28887	ATP8B1	18	57646426	57803315	-	7028	protein_coding	ATPase phospholipid transporting 8B1 [Source:HGNC Symbol;Acc:HGNC:3706]
ENSG00000030419	88.6673875228199	59.4388473386014	110.626367464706	109.431656037565	97.1335113816246	86.803997331116	96.6644499005338	143.176160070197	976.752930719028	56.2714220706505	181.515367492737	73.5501904181555	151.060834029895	119.083439394952	195.987216419191	98.9927971308954	250.603057220658	-1.34133	0.00689773382392127	0.289595	IKZF2	2	212999691	213152427	-	12240	protein_coding	IKAROS family zinc finger 2 [Source:HGNC Symbol;Acc:HGNC:13177]
ENSG00000247595	10.8572311252433	11.3992309964441	16.9672342737279	8.4178196951973	11.5243149096843	7.97179567326576	6.17007127024684	4.1701794195203	9.7057653458982	15.5828553426417	12.1010244995158	20.3813780676816	22.7084913901149	27.3997294183076	40.7050372562935	9.68473467041622	21.2263259029219	-1.09188	0.00695607604014104	0.291012	SPTY2D1OS	11	18588781	18610255	+	2283	protein_coding	SPTY2D1 opposite strand [Source:HGNC Symbol;Acc:HGNC:44122]
ENSG00000110876	1201.53357786025	771.076553830898	2741.22636926348	2096.03710410413	2370.71620999219	1054.04853902069	1583.65162603002	1188.50113456328	8739.60052282924	5402.05651878244	978.166147044193	5728.93953076356	2760.56269246788	1193.9959011901	1450.30540150201	1625.84888933312	3750.51810208277	-1.20601	0.0069668113315362	0.291012	SELPLG	12	108622277	108633959	-	2494	protein_coding	selectin P ligand [Source:HGNC Symbol;Acc:HGNC:10722]
ENSG00000115339	101.334157168937	84.6800016878705	76.013209546301	86.9841368503722	70.7922201594891	56.6883247876676	61.7007127024684	19.4608372910947	305.290437243707	88.3028469416361	48.4040979980632	152.417262071358	102.681874111824	80.0915167612068	262.321351207225	69.7067000242751	148.501340905003	-1.08591	0.00696815937215817	0.291012	GALNT3	2	165747591	165794682	-	4686	protein_coding	polypeptide N-acetylgalactosaminyltransferase 3 [Source:HGNC Symbol;Acc:HGNC:4125]
ENSG00000171346	0	0	6.78689370949116	2.10445492379933	9.87798420830081	0	6.17007127024684	12.5105382585609	0	6.92571348561852	8.06734966634386	7.08917498006318	14.8098856892053	63.2301448114791	135.683457520978	4.68124279629988	33.6865323076698	-2.8735	0.0069871737653426	0.291295	KRT15	17	41513743	41522529	-	7069	protein_coding	keratin 15 [Source:HGNC Symbol;Acc:HGNC:6421]
ENSG00000196126	1751.63328820591	1233.55963997234	1286.79504731952	4565.96569966994	1903.15829079929	1404.80754864439	1297.77165717525	1936.35331046392	10641.9305306253	2901.00823628846	6457.91340790826	1085.52991882217	7878.85918665724	1254.064538761	2020.17592309012	1922.50556028132	4605.64024887893	-1.2604	0.00702579625690092	0.292271	HLA-DRB1	6	32578769	32589848	-	1229	protein_coding	major histocompatibility complex, class II, DR beta 1 [Source:HGNC Symbol;Acc:HGNC:4948]
ENSG00000077984	215.335083983991	333.83462203872	211.751083736124	338.817242731692	452.740942880454	203.72366720568	361.977514521148	148.736399296224	2463.4997132498	864.848471516612	469.92311806453	586.629229600228	316.931553748994	106.437410432656	227.646689840752	283.364569549254	719.416598064796	-1.34496	0.00703780851394767	0.292271	CST7	20	24949230	24959928	+	930	protein_coding	cystatin F [Source:HGNC Symbol;Acc:HGNC:2479]
ENSG00000155465	935.531415291793	981.962327265114	859.89943299253	862.125033783124	770.482768247463	718.347365668725	939.907523500935	834.035883904059	4298.77170592873	2333.96544465344	787.575011176819	1020.8411971291	1924.29781388408	736.631187053731	698.016009246811	862.786468831718	1685.72833843896	-0.966491	0.00704741911692929	0.292271	SLC7A7	14	22773222	22829820	-	5131	protein_coding	solute carrier family 7 member 7 [Source:HGNC Symbol;Acc:HGNC:11065]
ENSG00000163660	3297.88395429264	3171.42890936784	1918.65485167315	2538.67412307659	2881.07872742107	2380.90964108204	3070.63880215951	3244.39958838679	13078.0776324457	2261.24545305445	6862.28930993374	4614.16676514862	2651.95686408037	3038.20845819157	4148.89861219703	2812.95857468245	5236.40615643593	-0.89659	0.00707185735803984	0.292775	CCNL1	3	157146508	157160760	-	8729	protein_coding	cyclin L1 [Source:HGNC Symbol;Acc:HGNC:20569]
ENSG00000278745	0	0	0	0	0	0	0	0	1.76468460834513	0	3.02525612487895	15.0644968326343	3.94930285045476	4.21534298743194	0	0	4.002726200535	-4.50753	0.00709786520028634	1	AL391903.3	6	41252696	41252858	+	163	processed_pseudogene	triggering receptor expressed on myeloid cells 1 (TREM1) pseudogene
ENSG00000175087	144.76308166991	214.142696576057	293.193808250018	269.370230246314	261.766581519971	315.328806631401	310.560253935757	247.430645558204	230.291341389039	155.828553426417	209.75109132494	163.051024541453	170.807348282168	155.967690534982	191.464434501825	257.069513048454	182.451640571546	0.495122	0.00711705708874819	0.293267	PDIK1L	1	26111165	26125543	+	4535	protein_coding	PDLIM1 interacting kinase 1 like [Source:HGNC Symbol;Acc:HGNC:18981]
ENSG00000158517	722.910639089113	888.32578693718	707.194324528979	1160.25614798803	946.640153295494	232.953584674322	838.101347541862	437.868839049631	4995.82212622505	3098.39107062858	515.301959937714	2025.73175055305	721.735095920607	543.77924537872	818.623527043236	741.781352888076	1817.05496795528	-1.29266	0.00712317550102182	0.293267	NCF1	7	74773962	74789315	+	3462	protein_coding	neutrophil cytosolic factor 1 [Source:HGNC Symbol;Acc:HGNC:7660]
ENSG00000011295	1016.96064873112	1244.95887096879	1011.24716271418	1051.52597692506	1183.71177429471	1399.49301819554	1332.73539437332	949.410847844121	1013.81130749428	701.228490418875	1043.71336308324	801.962919619648	918.212912730731	771.407766700045	985.966457985776	1148.75546175586	890.900459718941	0.367266	0.00713034235849256	0.293267	TTC19	17	15999380	16045015	+	5966	protein_coding	tetratricopeptide repeat domain 19 [Source:HGNC Symbol;Acc:HGNC:26006]
ENSG00000076662	36.1907704174775	62.6957704804426	44.1148091116925	76.4618622313755	82.3165350691734	21.2581217953753	46.2755345268513	16.6807176780812	663.521412737768	275.297111053336	51.4293541229421	34.559728027808	38.5057027919339	29.5074009120236	36.1822553389275	48.2492651638087	161.286137854963	-1.74281	0.00713875293292218	0.293267	ICAM3	19	10333776	10339823	-	2950	protein_coding	intercellular adhesion molecule 3 [Source:HGNC Symbol;Acc:HGNC:5346]
ENSG00000254634	8.14292334393244	0	0.678689370949116	0	6.58532280553387	1.77151014961461	0	4.1701794195203	22.0585576043141	1.73142837140463	35.2946547902544	18.6090843226659	3.94930285045476	10.5383574685798	4.52278191736594	2.66857813619379	13.8148810464342	-2.44596	0.00714535314256873	0.293267	SMG1P6	16	29425800	29447026	-	2930	unprocessed_pseudogene	SMG1 pseudogene 6 [Source:HGNC Symbol;Acc:HGNC:49863]
ENSG00000223764	14.476308166991	39.0830777020941	40.0426728859978	29.4623689331906	6.58532280553387	30.1156725434484	12.3401425404937	73.6731697448586	1.76468460834513	101.288559727171	19.1599554575667	75.3224841631713	68.1254741703446	336.173603247697	150.759397245531	30.722341915326	107.513451231404	-1.8056	0.00719101050569906	0.293835	LINC02593	1	916865	921016	-	4152	lincRNA	long intergenic non-protein coding RNA 2593 [Source:HGNC Symbol;Acc:HGNC:53933]
ENSG00000112218	22.6192315109234	52.1107702694588	25.7901960960664	14.7311844665953	6.58532280553387	54.0310595632457	78.1542360897933	104.254485488007	2.64702691251769	8.65714185702315	11.0926057912228	5.31688123504739	29.6197713784107	31.6150724057395	0	44.784560786203	12.706928511423	1.81151	0.00719530494918047	0.293835	GPR63	6	96794126	96837463	-	5952	protein_coding	G protein-coupled receptor 63 [Source:HGNC Symbol;Acc:HGNC:13302]
ENSG00000100181	21.7144622504865	45.5969239857764	12.2164086770841	33.6712787807892	3.29266140276694	12.4005710473023	26.736975504403	56.9924520667774	353.819263973198	15.5828553426417	32.2693986653754	88.6146872507898	19.7465142522738	74.8223380269169	34.6746613664722	26.5777167144232	88.5042455539525	-1.73665	0.00719622258384075	0.293835	TPTEP1	22	16601887	16698742	+	9653	transcribed_unprocessed_pseudogene	TPTE pseudogene 1 [Source:HGNC Symbol;Acc:HGNC:43648]
ENSG00000274641	0.904769260436938	6.51384628368235	0.678689370949116	1.40296994919955	0	0.885755074807306	0	0	142.939453275955	0	0	1.7722937450158	0	0	24.121503559285	1.29825374238441	24.1190357971794	-4.17276	0.00722566332016557	0.294091	HIST1H2BO	6	27893463	27893843	+	381	protein_coding	histone cluster 1 H2B family member o [Source:HGNC Symbol;Acc:HGNC:4758]
ENSG00000204130	444.241706874536	333.83462203872	437.075954891231	418.085044861466	497.191871817807	463.249904124221	343.467300710407	535.173025505105	284.996564247738	247.594257110862	413.451670400123	366.86480521827	312.98225089854	300.343187854526	355.792177499454	434.039928852937	326.003559032787	0.411924	0.00722718108660014	0.294091	RUFY2	10	68341107	68407294	-	8137	protein_coding	RUN and FYVE domain containing 2 [Source:HGNC Symbol;Acc:HGNC:19761]
ENSG00000232453	25.3335392922343	65.1384628368235	26.4688854670155	44.8950383743856	42.8045982359702	21.2581217953753	26.736975504403	36.1415549691759	16.7645037792787	19.0457120854509	16.1346993326877	22.1536718126974	20.7338399648875	12.6460289622958	33.1670673940169	36.0971470594229	20.0922176187593	0.85952	0.00728540666321935	0.295954	AC105277.1	1	58882868	58903747	-	1746	lincRNA	uncharacterized LOC105378753 [Source:NCBI gene;Acc:105378753]
ENSG00000272691	0	22.7984619928882	5.42951496759293	1.40296994919955	9.87798420830081	10.6290608976877	0	2.78011961301353	1.76468460834513	1.73142837140463	0	0	0	0	0	6.61476395358534	0.499444711392822	3.60228	0.00730375119529549	0.296194	AC092807.2	1	85578500	85578742	-	243	lincRNA	novel transcript
ENSG00000254995	36.1907704174775	27.68384670565	15.6098555318297	16.8356393903946	1.64633070138347	18.6008565709534	15.4251781756171	15.2906578715744	253.232241297526	22.5085688282602	51.4293541229421	23.0398186852053	19.7465142522738	16.8613719497278	27.1366915041957	18.41039192061	59.1363658057329	-1.67627	0.00734268372263834	0.297156	STX16-NPEPL1	20	58651434	58715410	+	3859	protein_coding	STX16-NPEPL1 readthrough (NMD candidate) [Source:HGNC Symbol;Acc:HGNC:41993]
ENSG00000135334	1011.5320331685	991.733096690637	889.761765314291	1036.09330748387	959.810798906562	852.096381964628	1194.93713600447	1092.58700791432	1934.97667305043	1290.77985088215	1253.46445440818	1230.85800591347	1267.72621499598	1063.32026857971	1130.69547934149	1003.56894093091	1310.2601353102	-0.385529	0.00735245272308353	0.297156	AKIRIN2	6	87675072	87702209	-	1999	protein_coding	akirin 2 [Source:HGNC Symbol;Acc:HGNC:21407]
ENSG00000100450	60.6195404492748	45.5969239857764	116.734571803248	346.533577452289	149.816093825896	20.372366720568	88.4376882068713	29.1912559366421	1844.09541572066	191.322835040212	439.67055681574	41.6489030078712	98.732571261369	74.8223380269169	143.221427383255	107.162752297571	404.787721036575	-1.91681	0.00738915767956775	0.297262	GZMH	14	24606480	24609699	-	951	protein_coding	granzyme H [Source:HGNC Symbol;Acc:HGNC:4710]
ENSG00000266903	26.2383085526712	16.2846157092059	7.46558308044027	21.746034212593	26.3412912221355	193.094606307993	91.5227238419947	33.3614353561624	0	15.5828553426417	14.1178619161018	19.4952311951738	13.8225599765917	14.7537004560118	25.6290975317403	52.0068247853995	14.7716152026087	1.82352	0.00738921947749678	0.297262	AC243964.2	19	44632199	44718759	-	1418	antisense	novel transcript, antisense to CEACAM16, CEACAM19, PVR & IGSF23
ENSG00000151322	5.42861556262163	31.7550006329514	31.2197110636593	16.1341544157948	26.3412912221355	49.6022841892091	26.736975504403	4.1701794195203	0	8.65714185702315	14.1178619161018	0	1.97465142522738	12.6460289622958	6.03037588982126	23.9235265012869	6.20372286435276	1.95833	0.00739252397590279	0.297262	NPAS3	14	32934933	33804176	+	9241	protein_coding	neuronal PAS domain protein 3 [Source:HGNC Symbol;Acc:HGNC:19311]
ENSG00000231940	6.33338482305856	0.814230785460293	4.07213622569469	2.8059398983991	0	2.65726522442192	1.02834521170781	0	11.4704499542433	6.92571348561852	2.01683741658596	8.86146872507898	2.96197713784107	9.48452172172186	22.6139095868297	2.2139127710928	9.19069686113135	-1.94471	0.00744122404542642	0.298059	RPS7P3	1	233288868	233289447	-	580	processed_pseudogene	ribosomal protein S7 pseudogene 3 [Source:HGNC Symbol;Acc:HGNC:36518]
ENSG00000115738	935.531415291793	1069.08502130937	1137.48338571072	1229.00167549881	1470.17331633544	720.11887581834	909.057167149701	874.347618292755	4169.94972951954	1071.75416189947	1725.40440988929	1354.91856806458	1505.67171173588	1201.3727514181	1364.37254507206	1043.09980942586	1770.49198251413	-0.763626	0.00744837648931993	0.298059	ID2	2	8678845	8684453	+	2205	protein_coding	inhibitor of DNA binding 2 [Source:HGNC Symbol;Acc:HGNC:5361]
ENSG00000186767	486.765862115072	420.143085297511	331.200413023168	279.191019890711	242.01061310337	466.79292442345	228.292636999133	236.31016710615	181.762514659548	128.125699483943	257.14677061471	186.090843226659	212.275028211943	289.804830385946	259.306163262314	336.338340244821	216.358835692152	0.640408	0.00744991524062398	0.298059	SPIN4	X	63347228	63351344	-	4117	protein_coding	spindlin family member 4 [Source:HGNC Symbol;Acc:HGNC:27040]
ENSG00000274286	52.4766171053424	96.8934634697749	18.3246130156261	24.5519741109921	39.5119368332032	7.08604059845845	93.5794142654103	38.9216745821894	8.82342304172563	13.851426971237	38.3199109151333	7.08917498006318	25.6704685279559	8.43068597486388	0	46.4182167476246	14.5978700587113	1.66072	0.0074767062608428	0.298509	ADRA2B	2	96112875	96116245	-	3371	protein_coding	adrenoceptor alpha 2B [Source:HGNC Symbol;Acc:HGNC:282]
ENSG00000211786	0	0	4.07213622569469	5.6118797967982	8.23165350691734	0	0	5.56023922602706	125.292607192504	13.851426971237	2.01683741658596	0	3.94930285045476	6.32301448114791	27.1366915041957	2.93448859442966	25.5099829165893	-3.15357	0.00748623167887234	0.298509	TRAV8-2	14	21846537	21847221	+	566	TR_V_gene	T cell receptor alpha variable 8-2 [Source:HGNC Symbol;Acc:HGNC:12147]
ENSG00000259230	0	0	0	1.40296994919955	0	0	0	0	5.29405382503538	3.46285674280926	0	0	0	8.43068597486388	36.1822553389275	0.175371243649944	7.62426455451944	-4.69604	0.00755001125956838	0.300327	LINC02323	14	102545254	102555826	+	1603	lincRNA	long intergenic non-protein coding RNA 2323 [Source:HGNC Symbol;Acc:HGNC:53242]
ENSG00000186834	1316.43927393574	1065.01386738206	1436.78539829928	1285.12047346679	1010.84705064945	1409.23632401842	1260.75122955377	1536.01608618998	2052.32819950538	1330.60270342446	1402.71042323554	1751.02622007561	1870.98222540294	1594.45348499613	1610.11036258228	1290.02621293694	1658.8876598889	-0.36258	0.00755705557528207	0.300327	HEXIM1	17	45148502	45152101	+	3600	protein_coding	hexamethylene bisacetamide inducible 1 [Source:HGNC Symbol;Acc:HGNC:24953]
ENSG00000197622	2102.68376125544	1836.90465199842	1923.40567726979	1854.72627284181	1987.12115656985	1110.73686380836	1530.17767502122	2097.60024801871	9704.88300359402	2803.1825333041	2213.4790647031	2794.90723588991	1902.57664820658	1780.98241218999	2490.54524249618	1805.41953834795	3384.36516291198	-0.906708	0.00757282448140885	0.300358	CDC42SE1	1	151050971	151070325	-	4184	protein_coding	CDC42 small effector 1 [Source:HGNC Symbol;Acc:HGNC:17719]
ENSG00000116791	539.242479220415	355.818853246148	405.856243827571	418.085044861466	288.107872742107	400.361293812902	368.147585791395	543.513384344145	626.46303596252	360.137101252163	450.763162606963	573.33702651261	657.558924600717	806.184346346358	746.259016365381	414.891594730769	602.957516235245	-0.538009	0.00758774965755913	0.300358	CRYZ	1	74705482	74733408	-	4085	protein_coding	crystallin zeta [Source:HGNC Symbol;Acc:HGNC:2419]
ENSG00000221866	76.0006178767028	26.0553851347294	74.6558308044027	56.118797967982	62.5605666525718	43.401998665558	45.2471893151435	58.3825118732841	78.5284650713581	226.817116654006	26.2188864156175	404.969120736109	103.669199824437	47.4226086086093	60.3037588982126	55.3028622862968	135.418450886907	-1.29466	0.00759569654505774	0.300358	PLXNA4	7	132123332	132648688	-	16372	protein_coding	plexin A4 [Source:HGNC Symbol;Acc:HGNC:9102]
ENSG00000111912	1590.58435984814	2234.24927530304	1788.34649245092	1788.78668522943	1183.71177429471	1631.56084779506	1119.8679355498	1449.83237818656	879.695277260046	782.605623874893	1945.23968829716	705.372910516287	672.368810289923	1111.79671293517	1044.76262291153	1598.36746858221	1020.26309229786	0.648256	0.00763350334838935	0.300856	NCOA7	6	125781161	125932030	+	7820	protein_coding	nuclear receptor coactivator 7 [Source:HGNC Symbol;Acc:HGNC:21081]
ENSG00000162729	474.099092468955	537.392318403794	603.354850773764	617.306777647802	421.460659554168	506.651902789779	461.727000056805	586.605238345855	1335.86624851726	896.879896387598	440.678975524033	723.095847966445	620.040547521397	928.429292981884	575.90089747793	526.074730005115	788.69881519665	-0.584175	0.00763603308117775	0.300856	IGSF8	1	160091340	160098943	-	2592	protein_coding	immunoglobulin superfamily member 8 [Source:HGNC Symbol;Acc:HGNC:17813]
ENSG00000166401	666.814944942023	458.411932214145	565.348246000613	578.725104044815	492.252879713657	390.617987990022	367.119240579687	515.71218821401	571.757813103821	586.954217906169	612.11015593384	797.532185257108	655.58427317549	749.277216016027	725.152700751006	504.375315462372	671.195508877637	-0.411091	0.00765294880769217	0.300856	SERPINB8	18	63969925	64019779	+	5868	protein_coding	serpin family B member 8 [Source:HGNC Symbol;Acc:HGNC:8952]
ENSG00000158050	285.002317037635	547.977318614777	437.75464426218	502.263241813439	707.922201594891	132.863261221096	299.248456606972	189.04813368492	5249.05436752258	670.062779733592	862.1979955905	408.513708226141	379.133073643657	257.135922233348	272.874509014412	387.759946854489	1156.99605085203	-1.57751	0.00767198163985202	0.300856	DUSP2	2	96143166	96145440	-	1932	protein_coding	dual specificity phosphatase 2 [Source:HGNC Symbol;Acc:HGNC:3068]
ENSG00000197971	489.480169896383	931.480018566575	728.91238439935	850.199789214928	1091.51725501724	329.500887828318	770.230563569147	640.817570799619	5883.45848422265	1627.54266912035	674.632115848005	1142.24331866268	899.453724191071	375.165525881443	1373.41810890679	729.017329911445	1710.84484954757	-1.23098	0.00768087274524628	0.300856	MBP	18	76978827	77133683	-	18615	protein_coding	myelin basic protein [Source:HGNC Symbol;Acc:HGNC:6925]
ENSG00000172264	4.52384630218469	0	1.35737874189823	4.20890984759865	0	8.85755074807306	0	0	79.4108073755307	1.73142837140463	8.06734966634386	10.6337624700948	1.97465142522738	12.6460289622958	3.01518794491063	2.36846070496933	16.7827451736868	-2.78634	0.00769418408745121	0.300856	MACROD2	20	13995369	16053197	+	11428	protein_coding	MACRO domain containing 2 [Source:HGNC Symbol;Acc:HGNC:16126]
ENSG00000175489	397.193705331816	398.158854090083	314.91186812039	465.786023134251	572.923084081447	321.529092155052	573.816628132956	364.195669304773	2992.90509575333	1419.7712645518	366.055991110353	537.005004739786	990.287689751531	162.29070501613	465.846537488692	426.064365543846	990.594612630232	-1.21785	0.00769675416540166	0.300856	LRRC25	19	18391144	18397617	-	2415	protein_coding	leucine rich repeat containing 25 [Source:HGNC Symbol;Acc:HGNC:29806]
ENSG00000167749	0	172.616926517582	6.10820433854204	23.1490041617926	0	0	15.4251781756171	2.78011961301353	0	5.19428511421389	0	1.7722937450158	5.92395427568214	0	0	27.5099291008184	1.84150473355883	3.8849	0.00772675598582987	0.301006	KLK4	19	50906352	50910738	-	1935	protein_coding	kallikrein related peptidase 4 [Source:HGNC Symbol;Acc:HGNC:6365]
ENSG00000160766	73.2863100953919	100.150386611616	71.2623839496571	75.058892282176	115.243149096843	119.576935098986	62.7290579141762	111.204784520541	146.468822492646	131.588556226752	105.883964370763	131.149737131169	134.276296915462	169.667555244136	96.4860142371401	91.0639874461735	130.788706659724	-0.533815	0.00774111762679377	0.301006	GBAP1	1	155213821	155227422	-	3656	transcribed_unprocessed_pseudogene	glucosylceramidase beta pseudogene 1 [Source:HGNC Symbol;Acc:HGNC:4178]
ENSG00000128342	678.576945327703	132.719618030028	760.810784833959	560.486494705221	472.496911297055	80.6037118074649	195.385590224483	120.935203166089	7.94108073755307	1130.62272652722	318.660311820582	5323.97041002745	631.888456072761	2173.00931002116	631.681874458777	375.251907424	1459.68202423793	-1.95956	0.00774147886815113	0.301006	LIF	22	30240447	30246851	-	3969	protein_coding	LIF, interleukin 6 family cytokine [Source:HGNC Symbol;Acc:HGNC:6596]
ENSG00000163221	146.572620190784	402.230008017385	73.2984520625045	108.028686088365	302.924849054558	15.0578362717242	237.547743904503	101.474365874994	2111.44513388494	654.47992439095	223.868953241042	653.090245038321	111.567805525347	55.8532945834732	260.813757234769	173.391820183102	581.588444842692	-1.74694	0.00776206166827004	0.301006	S100A12	1	153373706	153375649	-	518	protein_coding	S100 calcium binding protein A12 [Source:HGNC Symbol;Acc:HGNC:10489]
ENSG00000179761	39.8098474592253	103.407309753457	25.7901960960664	36.4772186791883	32.9266140276694	38.0874682167142	60.6723674907606	34.7514951626691	18.5291883876238	12.9857127855347	12.1010244995158	15.0644968326343	19.7465142522738	18.9690434434437	58.7961649257573	46.4903146107188	22.3131635895405	1.08928	0.00776381303470638	0.301006	PIPOX	17	28950513	29057220	+	4059	protein_coding	pipecolic acid and sarcosine oxidase [Source:HGNC Symbol;Acc:HGNC:17804]
ENSG00000137672	1652.10866955785	1469.68656775583	1470.71986684673	1275.29968382239	852.799303316637	1338.37591803384	1222.70245672058	2299.15891996219	28.234953733522	405.154238908683	1552.96481077119	661.065566890892	487.738902031163	327.742917272833	740.228640475559	1447.60642325201	600.447147154835	1.26978	0.00778504430558282	0.301338	TRPC6	11	101451564	101872562	-	5537	protein_coding	transient receptor potential cation channel subfamily C member 6 [Source:HGNC Symbol;Acc:HGNC:12338]
ENSG00000243243	0	1.62846157092059	0	4.20890984759865	0	0	0	0	7.05873843338051	12.1199985998324	16.1346993326877	3.54458749003159	3.94930285045476	5.26917873428992	0	0.729671427314905	6.86807220581099	-3.09293	0.00781838657446075	0.302137	AC073130.2	7	116237929	116327896	-	917	antisense	novel transcript
ENSG00000139890	76.0006178767028	40.7115392730147	41.4000516278961	38.5816736029876	39.5119368332032	38.9732232915215	46.2755345268513	16.6807176780812	288.525933464428	109.945701584194	25.2104677073246	195.838458824245	54.3029141937529	21.0767149371597	54.2733830083913	42.2669118387823	107.024796245642	-1.34014	0.00787763296783958	0.303449	REM2	14	22883165	22887686	+	2305	protein_coding	RRAD and GEM like GTPase 2 [Source:HGNC Symbol;Acc:HGNC:20248]
ENSG00000086717	65.1433867514595	29.3123082765706	196.819917575244	136.789570046956	32.9266140276694	106.290608976877	126.48646104006	83.4035883904059	13.2351345625885	37.2257099851995	75.6314031219737	54.9411060954897	62.2015198946624	20.0228791903017	37.6898493113829	97.1465568856553	42.992514594514	1.17991	0.00787780994014825	0.303449	PPEF1	X	18675909	18827921	+	3513	protein_coding	protein phosphatase with EF-hand domain 1 [Source:HGNC Symbol;Acc:HGNC:9243]
ENSG00000072952	643.290944170663	948.578865061242	1078.43741043814	1099.92844017245	893.957570851223	1557.15742151124	1095.18765046881	1463.73297625162	176.468460834513	861.385614773803	1133.46262812131	480.291604899281	498.599484869913	554.3176028473	625.651498568956	1097.53390986568	618.596699273582	0.827291	0.00795859840845233	0.304749	MRVI1	11	10573091	10693988	-	7700	protein_coding	murine retrovirus integration site 1 homolog [Source:HGNC Symbol;Acc:HGNC:7237]
ENSG00000152705	0	0	0.678689370949116	1.40296994919955	0	0	45.2471893151435	1.39005980650677	7.05873843338051	4.32857092851157	7.05893095805088	6.20302810755528	2.96197713784107	0	3.01518794491063	6.08986355522486	4.37520478717856	-2.66233	0.00797273464085604	0.304749	CATSPER3	5	134967906	135011707	+	1581	protein_coding	cation channel sperm associated 3 [Source:HGNC Symbol;Acc:HGNC:20819]
ENSG00000135643	191.811083212631	179.130772801265	169.672342737279	159.237089234149	177.803715749415	359.616560371766	311.588599147465	122.325262972595	41.4700882961105	152.365696683607	137.144944327846	93.9315684858372	122.428388364098	113.814260660662	176.388494777272	208.898178278321	119.649063085062	0.807882	0.0079782079661461	0.304749	KCNMB4	12	70366276	70434292	+	4874	protein_coding	potassium calcium-activated channel subfamily M regulatory beta subunit 4 [Source:HGNC Symbol;Acc:HGNC:6289]
ENSG00000110203	81.4292334393244	58.6246165531411	74.6558308044027	152.923724462751	59.2679052498049	33.6586928426776	137.798258368846	50.0421530342436	1495.5702055725	205.174262011449	20.1683741658596	217.105983764435	83.9226855721636	32.6689081525975	36.1822553389275	81.0500518443989	298.684667796847	-1.88139	0.00801643347421216	0.304749	FOLR3	11	72114869	72139892	+	1396	protein_coding	folate receptor 3 [Source:HGNC Symbol;Acc:HGNC:3795]
ENSG00000215283	5.42861556262163	0	5.42951496759293	1.40296994919955	0	3.54302029922922	0	0	6.17639612920794	23.3742830139625	7.05893095805088	4.43073436253949	6.91127998829583	8.43068597486388	7.53796986227657	1.97551509733042	9.13146861274244	-2.12166	0.00802521104178729	0.304749	HMGB3P24	9	36303499	36304924	-	622	processed_pseudogene	high mobility group box 3 pseudogene 24 [Source:HGNC Symbol;Acc:HGNC:39316]
ENSG00000171792	733.767870214356	512.965394839985	713.302528867521	596.963713384409	656.885949852004	578.398063849171	599.525258425651	672.788946349275	534.699436328573	343.688531723819	521.352472187472	432.439673783854	490.700879169004	603.847882949625	508.059168717441	633.074715722796	490.684006408541	0.368041	0.00802742600597392	0.304749	RHNO1	12	2876258	2889523	+	2643	protein_coding	RAD9-HUS1-RAD1 interacting nuclear orphan 1 [Source:HGNC Symbol;Acc:HGNC:28206]
ENSG00000273188	25.3335392922343	18.7273080655867	14.2524767899314	11.9252445681962	9.87798420830081	12.4005710473023	2.05669042341561	9.73041864554736	179.11548774703	25.9714255710694	27.2273051239105	24.8121124302211	3.94930285045476	18.9690434434437	18.0911276694638	13.0380291300643	42.5908292622277	-1.70395	0.00803950123138066	0.304749	AL022328.3	22	50191724	50192402	-	679	antisense	novel transcript, antisense to TRABD
ENSG00000135373	18.0953852087388	14.6561541382853	8.8229618223385	5.6118797967982	0	0	0	0	3.52936921669025	0	16.1346993326877	64.6887216930765	20.7338399648875	35.8304153931715	194.479622446736	5.89829762077009	47.9138097210356	-2.99931	0.00803998976834215	0.304749	EHF	11	34621093	34661057	+	4386	protein_coding	ETS homologous factor [Source:HGNC Symbol;Acc:HGNC:3246]
ENSG00000124226	1490.15497193964	1334.52425736942	1506.69040350704	1607.80356178269	1707.24493733466	1254.22918592715	1253.55281307182	1680.58230606668	2491.73466698332	1926.21406318765	1490.44285085703	1944.20623828233	1792.98349410646	1675.5988375042	1863.38614995477	1479.34780462488	1883.50947155368	-0.349248	0.00804281060507342	0.304749	RNF114	20	49936336	49953892	+	4344	protein_coding	ring finger protein 114 [Source:HGNC Symbol;Acc:HGNC:13094]
ENSG00000160593	1408.72573850031	1459.10156754485	1537.23142519975	1755.11540644864	2332.85060386037	795.408057176961	1725.5632652457	1348.35801231156	10460.1680159657	4745.84516602009	967.07354125297	4607.96373704107	1183.80352942381	1110.74287718832	1873.93930776196	1545.29425953602	3564.21945352199	-1.2059	0.00804687708538005	0.304749	JAML	11	118193740	118225094	-	8587	protein_coding	junction adhesion molecule like [Source:HGNC Symbol;Acc:HGNC:19084]
ENSG00000078401	1358.05865991584	1106.53963744054	795.423942752364	743.574073075762	686.519902476906	749.348793286981	540.909581358306	1130.11862269	29.9996383418672	298.671394067299	1168.75728291157	292.428467927606	266.577942405696	230.790028561899	342.223831747356	888.811651624588	375.63551228047	1.24273	0.00805510316252627	0.304749	EDN1	6	12290363	12297194	+	2033	protein_coding	endothelin 1 [Source:HGNC Symbol;Acc:HGNC:3176]
ENSG00000130005	237.049546234478	516.222317981826	489.335036454312	349.339517350688	324.327148172543	492.479821592862	425.734917647032	437.868839049631	202.056387655517	433.72280703686	346.896035652786	238.373508704624	234.983519602058	184.421255700147	235.184659703029	409.044643060422	267.948310579289	0.6101	0.00807895257825285	0.304749	GAMT	19	1397026	1401570	-	2403	protein_coding	guanidinoacetate N-methyltransferase [Source:HGNC Symbol;Acc:HGNC:4136]
ENSG00000207205	1.80953852087388	0	0	0	0	0	0	0	14.9998191709336	0	25.2104677073246	1.7722937450158	0	0	9.04556383473189	0.226192315109234	7.28973492257226	-4.64248	0.00808933522471987	0.304749	RNVU1-15	1	144412576	144412740	+	165	snRNA	RNA, variant U1 small nuclear 15 [Source:HGNC Symbol;Acc:HGNC:48320]
ENSG00000028277	807.958949570185	325.692314184117	430.967750552688	740.768133177363	615.727682317417	454.392353376148	549.136343051968	364.195669304773	3283.19571382611	949.688461715439	745.221425428514	1460.37004589302	517.358673409573	492.141293782679	446.247815846773	536.104899441832	1127.74620427173	-1.07317	0.00810120657566618	0.304749	POU2F2	19	42086110	42196585	-	9072	protein_coding	POU class 2 homeobox 2 [Source:HGNC Symbol;Acc:HGNC:9213]
ENSG00000164306	328.431241538608	271.953082343738	308.803663781848	337.414272782492	355.607431498829	288.756154387182	208.754077976685	339.174592787651	253.232241297526	190.457120854509	222.860534532749	186.976990099166	209.313051074102	312.989216816821	212.570750116199	304.861814637129	226.91427211301	0.424831	0.00810358381943372	0.304749	PRIMPOL	4	184649613	184694963	+	2843	protein_coding	primase and DNA directed polymerase [Source:HGNC Symbol;Acc:HGNC:26575]
ENSG00000240710	0	0	0	0	0	0	0	0	39.7054036877654	0	0	6.20302810755528	1.97465142522738	1.05383574685798	0	0	6.99098842391514	-5.30905	0.00812417005486699	0.305041	AL512306.3	1	204603035	204616565	+	683	antisense	novel transcript
ENSG00000160145	902.054952655627	1003.94655847254	799.496078978058	773.737926983552	732.617162115643	874.240258834811	608.780365331021	954.971087070148	46.7641421211459	345.419960095224	789.591848593405	476.747017409249	425.5373821365	496.356636770111	414.588342425212	831.230548805175	427.857904221549	0.958399	0.00818768162471405	0.305759	KALRN	3	124080023	124726325	+	24490	protein_coding	kalirin RhoGEF kinase [Source:HGNC Symbol;Acc:HGNC:4814]
ENSG00000079387	510.289862886433	674.997321146583	468.29566595489	479.815722626246	619.020343720184	557.139942053796	520.34267712415	528.222726472571	387.348271531755	412.079952394302	441.687394232326	431.553526911346	436.397964975251	490.033622288963	494.490822965343	544.765532748107	441.941650757041	0.301963	0.00819382342725665	0.305759	SENP1	12	48042898	48106308	-	6342	protein_coding	SUMO specific peptidase 1 [Source:HGNC Symbol;Acc:HGNC:17927]
ENSG00000152492	2935.07148085743	2783.04082470328	1850.10722520729	2420.82464734382	1761.57385048031	2566.91820679157	2026.86841227609	2657.79435004094	1102.9278802157	1186.02843441217	2807.43768388766	1119.20349997747	1626.12544867475	1372.0941424091	1851.32539817513	2375.27487471259	1580.73464110743	0.58788	0.00819437965206466	0.305759	CCDC50	3	191329077	191398670	+	9202	protein_coding	coiled-coil domain containing 50 [Source:HGNC Symbol;Acc:HGNC:18111]
ENSG00000196747	0	0	2.71475748379646	1.40296994919955	0	3.54302029922922	0	0	59.9992766837343	0	6.05051224975789	0	5.92395427568214	4.21534298743194	6.03037588982126	0.957593466528155	11.7456374409182	-3.53823	0.00820041738256563	0.305759	HIST1H2AI	6	27808199	27808701	+	503	protein_coding	histone cluster 1 H2A family member i [Source:HGNC Symbol;Acc:HGNC:4725]
ENSG00000189001	733.767870214356	342.791160678783	563.312177887766	359.160306995085	409.936344644484	95.6615480791891	233.434363057672	261.331243623272	0	1000.76559867188	114.9597327454	1488.72674581327	810.594410055839	4534.65521872991	7313.33836038073	374.924376897576	2180.43429519957	-2.5398	0.00820753012591113	0.305759	SBSN	19	35523367	35528351	-	1986	protein_coding	suprabasin [Source:HGNC Symbol;Acc:HGNC:24950]
ENSG00000120685	620.671712659739	510.522702483604	699.728741448538	683.246365260181	595.971713900816	656.344510432214	678.707839727152	600.505836410923	1210.57364132476	664.002780433675	850.096971090984	719.551260476413	749.38021587379	773.515438193761	785.456459649219	630.712427790396	821.796681006086	-0.381464	0.00823586214736764	0.306335	PROSER1	13	39009866	39038076	-	7315	protein_coding	proline and serine rich 1 [Source:HGNC Symbol;Acc:HGNC:20291]
ENSG00000125149	271.430778131081	341.976929893323	330.521723652219	425.099894607464	246.94960520752	288.756154387182	232.406017845964	355.855310465732	527.640697895193	421.602808437027	389.249621401091	466.999401811662	472.929016341957	334.065931753981	349.761801609633	311.624551773811	423.178468464364	-0.440424	0.00827326776992399	0.306861	C16orf70	16	67109958	67148539	+	5965	protein_coding	chromosome 16 open reading frame 70 [Source:HGNC Symbol;Acc:HGNC:29564]
ENSG00000255282	3.61907704174775	0	3.39344685474558	2.8059398983991	0	6.20028552365114	0	2.78011961301353	0	18.1799978997486	1.00841870829298	31.0151405377764	8.88593141352321	37.9380868868874	4.52278191736594	2.34985861644464	14.5071939090849	-2.59822	0.00827577536760537	0.306861	WTAPP1	11	102746968	102836766	+	3331	transcribed_processed_pseudogene	Wilms tumor 1 associated protein pseudogene 1 [Source:HGNC Symbol;Acc:HGNC:44115]
ENSG00000186407	1144.53311445273	1210.76117797946	483.90552148672	735.857738355164	737.556154219794	157.6644033157	746.578623699867	690.859723833862	3794.07190794202	2408.41686462384	903.543162630512	2021.30101619051	900.441049903685	551.156095606726	850.283000464797	738.464557167911	1632.74472819459	-1.1449	0.00831949806678199	0.308003	CD300E	17	74609887	74623738	-	3752	protein_coding	CD300e molecule [Source:HGNC Symbol;Acc:HGNC:28874]
ENSG00000166482	142.953543149036	224.727696787041	148.632972237856	383.010796131477	228.839967492302	672.288101778745	240.632779539627	304.423097624982	4.41171152086282	81.3771334560176	90.7576837463684	77.0947779081871	330.754113725586	102.222067445225	90.4556383473189	293.188619342633	111.010446592795	1.4015	0.00835889557052078	0.30834	MFAP4	17	19383442	19387240	-	2152	protein_coding	microfibril associated protein 4 [Source:HGNC Symbol;Acc:HGNC:7035]
ENSG00000111331	615.243097097118	552.862703327539	840.217441235005	858.617608910125	1089.87092431586	469.450189647872	713.671576925217	870.177438873235	1423.21813663034	1016.34845401452	770.431893135838	969.44467852364	2885.95305796981	628.086105127359	1501.56359656549	751.263872541496	1313.57798885243	-0.80658	0.00838197451700278	0.30834	OAS3	12	112938352	112973249	+	8251	protein_coding	2'-5'-oligoadenylate synthetase 3 [Source:HGNC Symbol;Acc:HGNC:8088]
ENSG00000283307	9.04769260436938	69.2096167641249	16.9672342737279	16.1341544157948	19.7559684166016	21.2581217953753	18.5102138107405	1.39005980650677	0	1.73142837140463	13.1094432078088	5.31688123504739	4.93662856306845	0	12.0607517796425	21.5341327359052	5.30787616528168	2.05227	0.00838578934402979	0.30834	OR5AK4P	11	57037534	57038436	+	903	unprocessed_pseudogene	olfactory receptor family 5 subfamily AK member 4 pseudogene [Source:HGNC Symbol;Acc:HGNC:15253]
ENSG00000196329	28.952616333982	35.8261545602529	49.5443240792855	65.9395876123789	11.5243149096843	19.4866116457607	97.6927951122416	33.3614353561624	484.405924990737	62.3314213705667	42.3535857483053	44.3073436253949	48.3789599180708	47.4226086086093	131.160675603612	42.7909799512185	122.908645695042	-1.51862	0.00839138830825142	0.30834	GIMAP5	7	150722253	150750033	+	6031	protein_coding	GTPase, IMAP family member 5 [Source:HGNC Symbol;Acc:HGNC:18005]
ENSG00000261707	3.61907704174775	0	0	0.701484974599775	0	1.77151014961461	0	0	2.64702691251769	2.59714255710694	4.03367483317193	7.08917498006318	4.93662856306845	3.16150724057395	7.53796986227657	0.761509020745267	4.57187499268267	-2.50033	0.00839337098763839	0.30834	AC092134.1	16	77741468	77743000	-	800	antisense	novel transcript, antisense to NUDT7
ENSG00000163472	184.572929129135	149.004233739234	69.2263158368098	130.476205275558	162.986739436963	132.863261221096	167.620269508372	165.417116974305	352.054579364853	179.202836440379	131.094432078088	207.358368166848	118.479085513643	356.196482437999	450.770597764139	145.270883890184	256.45091168085	-0.820196	0.00850310307017953	0.31189	TMEM79	1	156282935	156293185	+	3067	protein_coding	transmembrane protein 79 [Source:HGNC Symbol;Acc:HGNC:28196]
ENSG00000228113	0.904769260436938	1.62846157092059	4.75082559664381	11.2237595935964	6.58532280553387	2.65726522442192	6.17007127024684	2.78011961301353	1.76468460834513	0	0	0.886146872507898	0	0	3.01518794491063	4.58757436685174	0.809431346537665	2.63496	0.00856043919665695	0.313146	AC003991.1	7	88219359	88304367	+	4838	antisense	novel transcript, antisense to STEAP4
ENSG00000141338	23.5240007713604	14.6561541382853	6.78689370949116	20.3430642633935	0	48.7165291144018	16.4535233873249	13.9005980650677	0	8.65714185702315	0	3.54458749003159	9.8732571261369	2.10767149371597	6.03037588982126	18.0475954311656	4.31614769381841	2.07654	0.00856366383597241	0.313146	ABCA8	17	68867292	68955392	-	11243	protein_coding	ATP binding cassette subfamily A member 8 [Source:HGNC Symbol;Acc:HGNC:38]
ENSG00000242766	0	0	0.678689370949116	0.701484974599775	0	0	0	0	0	6.92571348561852	47.3956792897702	4.43073436253949	0	0	0	0.172521793193611	8.39316101970402	-4.84847	0.00858343958121832	0.313388	IGKV1D-17	2	90082635	90083291	+	532	IG_V_gene	immunoglobulin kappa variable 1D-17 [Source:HGNC Symbol;Acc:HGNC:5749]
ENSG00000183458	122.143850158987	88.751155615172	90.2656863362324	103.118291266167	108.657826291309	97.4330582288037	59.6440222790528	52.8222726472571	412.053856048587	48.4799943993296	243.028908698609	192.293871334214	99.7198969739827	126.460289622958	122.11511176888	90.3545203528725	177.735989835223	-0.976177	0.00859764552996446	0.313426	AC138932.1	16	14911551	14935708	+	6830	transcribed_unprocessed_pseudogene	polycystic kidney disease 1 (autosomal dominant) (PKD1) pseudogene
ENSG00000149346	363.717242695649	368.846545813513	214.465841219921	310.056358773101	240.364282401986	260.411991993348	347.580681557238	362.805609498266	217.056206826451	161.022838540631	246.054164823488	238.373508704624	188.579211109215	251.866743499058	271.366915041957	308.531069244128	224.902798363632	0.458594	0.00861974596574029	0.313751	SLX4IP	20	10435303	10636829	+	6492	protein_coding	SLX4 interacting protein [Source:HGNC Symbol;Acc:HGNC:16225]
ENSG00000254479	1.80953852087388	0	0	2.8059398983991	0	0	0	0	3.52936921669025	5.19428511421389	10.0841870829298	8.86146872507898	3.94930285045476	4.21534298743194	0	0.576934802409122	5.11913656811423	-2.99701	0.00865580129594158	0.31381	SLC25A1P1	11	85934737	85935663	+	927	processed_pseudogene	solute carrier family 25 member 1 pseudogene 1 [Source:HGNC Symbol;Acc:HGNC:43845]
ENSG00000245662	0.904769260436938	0	0.678689370949116	0	0	0.885755074807306	0	0	0	7.79142767132083	0	5.31688123504739	3.94930285045476	0	22.6139095868297	0.30865171327417	5.66736019195038	-3.90543	0.00866297499992963	0.31381	LINC02211	5	25187800	25324386	+	4807	lincRNA	long intergenic non-protein coding RNA 2211 [Source:HGNC Symbol;Acc:HGNC:53078]
ENSG00000211655	0	0	80.7640351429448	405.45831531867	75.7312122636395	0.885755074807306	31.878701562942	5.56023922602706	14.9998191709336	0	0	1.7722937450158	0	0	0	75.0347823236289	2.39601613084991	4.95642	0.00867116526142861	0.31381	IGLV1-36	22	22431958	22432465	+	393	IG_V_gene	immunoglobulin lambda variable 1-36 [Source:HGNC Symbol;Acc:HGNC:5876]
ENSG00000171777	274.145085912392	268.696159201897	274.190505863443	301.638539077903	467.557919192905	86.803997331116	219.037530093763	233.530047493137	1635.86263193593	1135.81701164144	208.742672616647	989.826056591322	315.944228036381	127.514125369816	189.95684052937	265.699973020819	657.666223817272	-1.30877	0.00867651868900574	0.31381	RASGRP4	19	38409051	38426305	-	4183	protein_coding	RAS guanyl releasing protein 4 [Source:HGNC Symbol;Acc:HGNC:18958]
ENSG00000101193	1257.62927200734	1100.02579115686	1121.19484080794	1233.21058534641	1024.01769626052	1089.47874201299	1065.36563932929	1313.60651714889	1949.09414991719	1465.65411639402	1360.35683748723	1215.79350908084	1360.53483198166	1280.41043243245	1403.5699883559	1150.56613550878	1433.63055223561	-0.317423	0.00868729513096018	0.31381	GID8	20	62938119	62948475	+	4622	protein_coding	GID complex subunit 8 homolog [Source:HGNC Symbol;Acc:HGNC:15857]
ENSG00000176986	504.861247323811	398.973084875544	583.672859016239	517.695911254634	525.179493741326	383.531947391564	391.799525660674	519.88236763353	1371.15994068416	416.408523322813	905.560000047098	840.953382009995	576.598216166395	487.925950795247	615.098340761768	478.199554612165	744.814907683926	-0.639829	0.00871003954048324	0.314155	SEC24C	10	73744384	73772161	+	5341	protein_coding	SEC24 homolog C, COPII coat complex component [Source:HGNC Symbol;Acc:HGNC:10705]
ENSG00000221869	1575.20328242071	1911.81388426077	1898.97285991563	1659.01196492847	1786.26881100106	1623.58905212179	1489.0438665529	1145.40928056157	3241.72562553	3049.91107622925	1728.42966601417	2584.89042710554	1432.60960900246	4237.47353811596	1497.04081464813	1636.16412522036	2538.86867952079	-0.633897	0.00872995195678119	0.314292	CEBPD	8	47736909	47739086	-	2178	protein_coding	CCAAT enhancer binding protein delta [Source:HGNC Symbol;Acc:HGNC:1835]
ENSG00000089639	1057.67526545078	1284.04194867088	1087.93906163143	1184.80812209902	1144.19983746151	603.199205943775	1201.10720727472	764.532893578721	5118.46770650504	2168.6140351843	1270.60757244916	1827.23485111129	1359.54750626905	732.415844066299	1186.47645632233	1040.93794276386	1951.90913884392	-0.907143	0.00874024580710323	0.314292	GMIP	19	19629476	19643667	-	3740	protein_coding	GEM interacting protein [Source:HGNC Symbol;Acc:HGNC:24852]
ENSG00000108405	47.9527708031577	201.929234794153	86.8722394814868	103.118291266167	134.999117513444	47.8307740395945	153.223436544463	97.3041864554736	1705.56767396557	289.148538024573	101.850289537591	179.887815119103	84.9100112847773	21.0767149371597	122.11511176888	109.153756362242	357.793736376807	-1.71368	0.00878418964785777	0.315074	P2RX1	17	3896592	3916500	-	3970	protein_coding	purinergic receptor P2X 1 [Source:HGNC Symbol;Acc:HGNC:8533]
ENSG00000100949	848.673566289847	793.875015823786	648.827038627355	676.933000488783	632.190989331252	619.142797290307	639.630721682255	809.014807386937	1072.04589956966	1078.67987538508	732.111982220705	1040.33642832427	907.352329891981	1001.14395951509	648.265408155785	708.535992115065	925.705126151797	-0.386852	0.00878845996995381	0.315074	RABGGTA	14	24265538	24271739	-	3545	protein_coding	Rab geranylgeranyltransferase subunit alpha [Source:HGNC Symbol;Acc:HGNC:9795]
ENSG00000125285	1.80953852087388	0	0	0	0	0	1.02834521170781	0	15.8821614751061	0	0	0	5.92395427568214	12.6460289622958	12.0607517796425	0.35473546657271	6.64469949896094	-4.12231	0.00880213801817916	0.31509	SOX21	13	94709622	94712399	-	2778	protein_coding	SRY-box 21 [Source:HGNC Symbol;Acc:HGNC:11197]
ENSG00000183486	684.910330150762	1506.32695310154	636.610629950271	768.126047186754	1504.74626106449	696.203488798543	1361.52906030114	736.731697448586	2289.6782793278	2204.9740309838	814.80231630073	1861.79457913909	2275.78576757455	922.106278500736	1519.65472423496	986.89805850026	1698.39942515167	-0.783788	0.00882688281228476	0.315501	MX2	21	41361943	41409390	+	13047	protein_coding	MX dynamin like GTPase 2 [Source:HGNC Symbol;Acc:HGNC:7533]
ENSG00000267096	11.7620003856802	0	0	6.31336477139798	0	10.6290608976877	4.11338084683122	0	68.82269972546	16.448569528344	24.2020489990316	12.4060562151106	11.8479085513643	13.6998647091538	3.01518794491063	4.10222586269963	21.4917622390535	-2.36749	0.00891588090144851	0.318205	AC008735.1	19	55670632	55672069	+	802	sense_intronic	novel transcript
ENSG00000168924	1204.24788564156	1022.67386653813	1119.15877269509	1059.94379662026	811.64103578205	1055.82004917031	1107.52779300931	1010.57347933042	1396.74786750517	1527.11982357888	1260.52338536623	1271.62076204883	1363.49680911951	1224.55713784898	1014.61074346243	1048.94833484839	1294.09664699	-0.302601	0.00894178508625199	0.318651	LETM1	4	1811479	1856247	-	8184	protein_coding	leucine zipper and EF-hand containing transmembrane protein 1 [Source:HGNC Symbol;Acc:HGNC:6556]
ENSG00000197980	14.476308166991	17.9130772801265	6.10820433854204	7.01484974599775	6.58532280553387	15.9435913465315	22.6235946575717	30.5813157431488	12.3527922584159	2.59714255710694	4.03367483317193	1.7722937450158	3.94930285045476	10.5383574685798	0	15.1557830105554	5.03479481610645	1.55764	0.00895544724780552	0.318661	LEKR1	3	156825481	157046129	+	5602	protein_coding	leucine, glutamate and lysine rich 1 [Source:HGNC Symbol;Acc:HGNC:33765]
ENSG00000141574	515.718478449054	547.977318614777	420.787409988452	561.18797967982	1071.76128660064	337.472683501584	848.38479965894	421.18812137155	2360.26566366161	2923.51680511672	483.032561272339	1134.26799681011	1100.86816956426	305.612366588816	633.189468431232	590.559759733102	1277.25043306358	-1.11373	0.00908047971887654	0.322628	SECTM1	17	82321024	82334074	-	2961	protein_coding	secreted and transmembrane 1 [Source:HGNC Symbol;Acc:HGNC:10707]
ENSG00000110931	1652.10866955785	1573.90810829475	1632.24793713262	1609.20653173188	1588.70912683505	1527.9275040426	1645.35233873249	1581.8880598047	1927.91793461705	2040.48833570036	1837.33888650981	1816.60108864119	1764.35104844066	1844.21255700147	1549.80660368406	1601.41853451649	1825.81663637066	-0.190196	0.00910745823415459	0.322943	CAMKK2	12	121237691	121298308	-	6931	protein_coding	calcium/calmodulin dependent protein kinase kinase 2 [Source:HGNC Symbol;Acc:HGNC:1470]
ENSG00000123146	2470.92485025328	2512.71620393046	2353.01604908058	2510.6147240926	2540.28827223469	1511.98391269607	2125.58955260004	2788.45997185257	11168.6888862163	5933.60502880366	3346.94169282441	3662.44502407514	2617.40046413889	1935.89626697812	1928.21269077035	2351.69919209254	4370.45572197241	-0.894243	0.00911646432019912	0.322943	ADGRE5	19	14380501	14408725	+	5382	protein_coding	adhesion G protein-coupled receptor E5 [Source:HGNC Symbol;Acc:HGNC:1711]
ENSG00000120696	266.906931828897	135.162310386409	256.544582218766	218.86331207513	158.047747332813	272.81256304065	259.142993350367	180.707774845879	131.469003321712	144.574269012287	113.951314037107	172.79864013904	158.959439730804	169.667555244136	186.941652584459	218.523526884864	154.051696295649	0.509916	0.00914959904208382	0.323635	KBTBD7	13	41189833	41194566	-	4734	protein_coding	kelch repeat and BTB domain containing 7 [Source:HGNC Symbol;Acc:HGNC:25266]
ENSG00000144136	2327.97130710424	1875.17349891506	1983.80903128427	2081.30591963753	1970.65784955601	1366.72008042767	2735.39826314276	1784.83679155469	2029.3872995969	2954.682515802	2716.68000014129	2848.96219511289	2837.57409805174	2828.49514456683	2356.36937894766	2015.73409270278	2653.16437603133	-0.396462	0.00921461415917628	0.324805	SLC20A1	2	112645857	112663827	+	5577	protein_coding	solute carrier family 20 member 1 [Source:HGNC Symbol;Acc:HGNC:10946]
ENSG00000157017	9.04769260436938	3.25692314184117	14.9311661608805	9.11930466979708	11.5243149096843	6.20028552365114	0	15.2906578715744	76.763780463013	45.0171376565204	28.2357238322035	19.4952311951738	2.96197713784107	12.6460289622958	10.5531578071872	8.67129311022475	27.9532910077478	-1.70325	0.0092408017748179	0.324805	GHRL	3	10285675	10292947	-	2064	protein_coding	ghrelin and obestatin prepropeptide [Source:HGNC Symbol;Acc:HGNC:18129]
ENSG00000285954	0	0	0	2.8059398983991	0	1.77151014961461	0	1.39005980650677	23.8232422126592	10.3885702284278	0	0.886146872507898	1.97465142522738	2.10767149371597	10.5531578071872	0.74593873181506	7.10477714853221	-3.20117	0.00924701500825959	0.324805	AC119428.3	1	53344031	53365473	+	886	lincRNA	novel transcript
ENSG00000103549	638.767097868478	486.095778919795	865.328947960123	689.559730031579	737.556154219794	537.653330408035	669.452732821782	752.02235532016	1430.27687506373	841.47418850265	1030.60391987543	1129.83726244757	858.97336997391	739.792694294305	631.681874458777	672.054515943718	951.805740659481	-0.503225	0.00925415975051088	0.324805	RNF40	16	30761745	30776307	+	6523	protein_coding	ring finger protein 40 [Source:HGNC Symbol;Acc:HGNC:16867]
ENSG00000111291	0	1.62846157092059	0	0.701484974599775	0	0	6.17007127024684	2.78011961301353	63.5286459004246	3.46285674280926	9.07576837463684	0.886146872507898	2.96197713784107	5.26917873428992	0	1.41001717859759	12.1692248232157	-3.14094	0.0092582807127086	0.324805	GPRC5D	12	12940775	12952147	-	1124	protein_coding	G protein-coupled receptor class C group 5 member D [Source:HGNC Symbol;Acc:HGNC:13310]
ENSG00000144285	8.14292334393244	9.77076942552352	6.10820433854204	0	1.64633070138347	4.42877537403653	5.14172605853903	6.95029903253383	0	0.865714185702315	2.01683741658596	0	0	1.05383574685798	3.01518794491063	5.27362853431136	0.99308218486527	2.53855	0.00926754264146091	0.324805	SCN1A	2	165984641	166149214	-	16946	protein_coding	sodium voltage-gated channel alpha subunit 1 [Source:HGNC Symbol;Acc:HGNC:10585]
ENSG00000171649	171.001390222581	231.241543070723	186.639577011007	205.535097557734	197.559684166016	199.294891831644	139.854948792262	204.338791556495	139.410084059265	128.991413669645	180.506948784444	132.922030876185	152.048159742508	171.775226737851	123.622705741336	191.933240526058	147.039509944462	0.383648	0.00927818788686288	0.324805	ZIK1	19	57578456	57593777	+	5257	protein_coding	zinc finger protein interacting with K protein 1 [Source:HGNC Symbol;Acc:HGNC:33104]
ENSG00000137959	258.764008484964	210.885773434216	139.810010415518	227.281131770327	632.190989331252	203.72366720568	398.997942142629	180.707774845879	404.112775311034	266.639969196313	255.129933198124	141.783499601264	2179.02784773841	322.473738538543	1566.39013738107	281.545162203808	733.651128709252	-1.38255	0.00931366271245999	0.325313	IFI44L	1	78619922	78646145	+	10240	protein_coding	interferon induced protein 44 like [Source:HGNC Symbol;Acc:HGNC:17817]
ENSG00000151413	154.715543534716	239.383850925326	221.931424300361	182.386093395942	187.681699957715	186.894320784342	176.875376413743	191.828253297934	101.469364979845	59.7342788134597	133.111269494674	158.620290178914	145.136879754212	168.613719497278	156.789773135353	192.71207032626	131.925082264819	0.55117	0.00932604616194636	0.325313	NUBPL	14	31489956	31861224	+	7590	protein_coding	nucleotide binding protein like [Source:HGNC Symbol;Acc:HGNC:20278]
ENSG00000271383	680.386483848577	622.072320091664	667.83034101393	676.231515514183	1025.6640269619	635.972143711646	577.930008979787	814.575046612965	2619.67430108834	916.791322658751	681.691046806056	1333.65104312439	952.769312672211	768.246259459471	913.601947307921	712.582735841832	1169.48931901673	-0.71585	0.0093387408508376	0.325313	NBPF19	1	149390623	149556361	+	18785	protein_coding	NBPF member 19 [Source:HGNC Symbol;Acc:HGNC:31999]
ENSG00000232434	139.334466107288	105.035771324378	127.593601738434	175.371243649944	136.645448214828	146.149587343205	131.628187098599	148.736399296224	531.170067111883	201.711405268639	266.222538989347	179.887815119103	140.200251191144	246.597564764768	97.9936082095955	138.811838096613	237.683321522069	-0.778012	0.00934737782861426	0.325313	AJM1	9	136844415	136848801	+	4387	protein_coding	apical junction component 1 homolog [Source:HGNC Symbol;Acc:HGNC:37284]
ENSG00000137266	123.048619419424	124.577310175425	181.888751414363	162.043029132548	131.706456110677	248.011420946046	214.924149246931	175.147535619852	288.525933464428	251.057113853671	174.456436534686	280.022411712496	208.325725361489	231.843864308757	256.290975317403	170.168409008158	241.503208650419	-0.503722	0.00936585428131853	0.325481	SLC22A23	6	3268962	3457022	-	8898	protein_coding	solute carrier family 22 member 23 [Source:HGNC Symbol;Acc:HGNC:21106]
ENSG00000224635	3.61907704174775	0	2.71475748379646	5.6118797967982	11.5243149096843	10.6290608976877	11.3117973287859	5.56023922602706	22.0585576043141	14.7171411569394	20.1683741658596	3.54458749003159	14.8098856892053	27.3997294183076	18.0911276694638	6.37139083556591	17.2556290277316	-1.4724	0.00946787622096452	0.328546	AL391095.1	20	38406011	38416797	-	2004	lincRNA	novel transcript
ENSG00000112212	0	0	0	0	0	0	4.11338084683122	0	7.05873843338051	3.46285674280926	0	4.43073436253949	1.97465142522738	4.21534298743194	24.121503559285	0.514172605853903	6.46626107295337	-3.60085	0.00952515273133991	0.330032	TSPO2	6	41042554	41044337	+	988	protein_coding	translocator protein 2 [Source:HGNC Symbol;Acc:HGNC:21256]
ENSG00000163661	100.4293879085	102.593078967997	136.416563560772	150.117784564352	87.2555271733238	23.02963194499	59.6440222790528	79.2334089708856	72.3520689421502	182.665693183188	78.6566592468526	408.513708226141	92.8086169856868	610.170897430773	111.561953961693	92.3399256712342	222.389942568069	-1.26665	0.00954552207008363	0.330032	PTX3	3	157436789	157443628	+	1940	protein_coding	pentraxin 3 [Source:HGNC Symbol;Acc:HGNC:9692]
ENSG00000091128	30.7621548548559	45.5969239857764	23.754127983219	22.4475191871928	16.4633070138347	31.887182693063	14.3968329639093	15.2906578715744	0	0	16.1346993326877	9.74761559758688	16.7845371144327	6.32301448114791	0	25.0748383191782	6.99855236083646	1.83722	0.0095522666606083	0.330032	LAMB4	7	108023548	108130356	-	7016	protein_coding	laminin subunit beta 4 [Source:HGNC Symbol;Acc:HGNC:6491]
ENSG00000111325	5.42861556262163	0	7.46558308044027	2.8059398983991	6.58532280553387	2.65726522442192	0	5.56023922602706	31.7643229502123	4.32857092851157	5.04209354146491	13.2922030876185	10.8605828387506	29.5074009120236	3.01518794491063	3.81287072468048	13.9729088862131	-1.90154	0.00959000624190435	0.330855	OGFOD2	12	122974580	122980043	+	4608	protein_coding	2-oxoglutarate and iron dependent oxygenase domain containing 2 [Source:HGNC Symbol;Acc:HGNC:25823]
ENSG00000161249	365.526781216523	202.743465579613	133.023116706027	141.699964869155	107.011495589925	218.781503477405	150.13840090934	20.8508970976015	27.3526114293495	139.379983898073	10.0841870829298	267.616355497385	50.3536113432982	1547.03087638752	4598.16161598871	167.471953180699	948.56846308961	-2.50112	0.00962570206229281	0.331323	DMKN	19	35497220	35513658	-	7444	protein_coding	dermokine [Source:HGNC Symbol;Acc:HGNC:25063]
ENSG00000131831	43.428924500973	197.858080866851	222.61011367131	167.654908929346	240.364282401986	140.835056894362	170.705305143496	94.52406684246	11.4704499542433	51.9428511421389	172.4395991181	58.4856935855213	86.8846627100047	74.8223380269169	54.2733830083913	159.747592406348	72.9027110779023	1.1319	0.00963882803500689	0.331323	RAI2	X	17800049	17861337	-	2622	protein_coding	retinoic acid induced 2 [Source:HGNC Symbol;Acc:HGNC:9835]
ENSG00000013364	5762.47541972285	5605.16472710866	6704.09360623537	6145.00837749403	5516.854180336	6365.92172264011	6536.16216561482	5582.48018293117	6930.79879927549	10937.433022163	5994.04080209349	10013.4596593392	8775.35093371047	7216.66719448348	5860.01777093381	6027.27004776038	7961.10974028557	-0.401511	0.00964531227835089	0.331323	MVP	16	29820394	29848039	+	6141	protein_coding	major vault protein [Source:HGNC Symbol;Acc:HGNC:7531]
ENSG00000015285	1005.19864834544	1073.97040602213	919.624097636052	1097.12250027405	1387.85678126626	689.117448200084	997.494855356572	774.263312224268	5714.04876182152	2821.36253120384	893.458975547582	1806.8534730436	1335.85168916632	590.148018240471	1001.04239771033	993.081006165607	2023.2522638191	-1.02701	0.00966194414705132	0.331335	WAS	X	48676596	48691427	+	2381	protein_coding	Wiskott-Aldrich syndrome [Source:HGNC Symbol;Acc:HGNC:12731]
ENSG00000204103	1045.00849580466	1560.06618494192	1110.33581087275	1543.26694411951	1807.67111011905	2173.64295357713	1940.48741449263	1726.4542796814	4878.4705997701	1915.82549295922	1555.99006689607	2265.87755300269	3739.98979938066	1563.89224833725	2440.79464140515	1613.36664920113	2622.97720025016	-0.70139	0.00968491788754044	0.331335	MAFB	20	40685848	40689240	-	3393	protein_coding	MAF bZIP transcription factor B [Source:HGNC Symbol;Acc:HGNC:6408]
ENSG00000113361	538.337709959978	876.926555940736	759.453406092061	984.884904338085	480.728564803973	750.234548361788	518.285986700734	1601.34889709579	8.82342304172563	359.271387066461	779.507661510475	106.337624700948	263.615965267855	331.958260260265	363.330147361731	813.775071661643	316.120638458494	1.36446	0.00969489739583427	0.331335	CDH6	5	31193750	31329146	+	12379	protein_coding	cadherin 6 [Source:HGNC Symbol;Acc:HGNC:1765]
ENSG00000154370	608.909712274059	662.783859364679	558.561352291122	650.276571453992	586.093729692515	553.596921754566	698.2463987496	585.215178539348	1135.57454547009	821.562762231497	673.623697139712	722.209701093937	724.697073058448	678.670220976542	717.61473088873	612.960465514985	781.993247265565	-0.351861	0.00970134079524185	0.331335	TRIM11	1	228393673	228406840	-	8493	protein_coding	tripartite motif containing 11 [Source:HGNC Symbol;Acc:HGNC:16281]
ENSG00000152527	169.191851701707	144.118849026472	80.0853457719957	86.9841368503722	87.2555271733238	291.413419611604	257.086302926952	51.4322128407503	8.82342304172563	22.5085688282602	82.6903340800245	80.6393653982187	55.2902399063666	110.652753420088	76.887292595221	145.945955737897	62.4988538957007	1.22715	0.00974210843429365	0.331987	PLEKHH2	2	43637273	43767987	+	9835	protein_coding	pleckstrin homology, MyTH4 and FERM domain containing H2 [Source:HGNC Symbol;Acc:HGNC:30506]
ENSG00000228427	0	11.3992309964441	10.8590299351859	32.2683088315897	0	9.74330582288037	6.17007127024684	8.34035883904059	94.4106265464643	36.3599957994972	40.3367483317193	3.54458749003159	45.4169827802297	11.5921932154378	30.1518794491063	9.84753821192343	37.401859087498	-1.9028	0.0097611137957986	0.331987	AL590764.1	X	71183559	71198175	-	726	antisense	uncharacterized LOC107985688 [Source:NCBI gene;Acc:107985688]
ENSG00000162337	283.192778516761	372.917699740814	352.91847289354	370.384066588681	317.741825367009	531.453044884384	562.50483080417	216.849329815055	67.9403574212874	200.845691082937	319.668730528875	311.92369912278	217.211656775012	239.220714536763	195.987216419191	375.995256076302	221.828295126692	0.762023	0.00977613881614089	0.331987	LRP5	11	68312609	68449275	+	6164	protein_coding	LDL receptor related protein 5 [Source:HGNC Symbol;Acc:HGNC:6697]
ENSG00000258469	16.2858466878649	0	4.07213622569469	4.20890984759865	0	0	0	5.56023922602706	131.469003321712	0	55.463028956114	7.08917498006318	10.8605828387506	8.43068597486388	3.01518794491063	3.76589149839816	30.9039520023449	-3.02876	0.00977622059050515	0.331987	CHMP4BP1	14	55298644	55299231	+	588	processed_pseudogene	charged multivesicular body protein 4B pseudogene 1 [Source:HGNC Symbol;Acc:HGNC:43616]
ENSG00000197165	31.6669241152928	25.2411543492691	10.1803405642367	7.01484974599775	1.64633070138347	15.0578362717242	11.3117973287859	11.1204784520541	97.9399957631545	7.79142767132083	5.04209354146491	7.08917498006318	1.97465142522738	4.21534298743194	3.01518794491063	14.154963941093	18.1525534733676	1.41187	0.00981876564529743	0.33221	SULT1A2	16	28591943	28597109	-	2275	protein_coding	sulfotransferase family 1A member 2 [Source:HGNC Symbol;Acc:HGNC:11454]
ENSG00000184517	225.287545848797	285.795005696563	298.623323217611	231.490041617926	214.022991179851	286.09888916276	356.835788462609	278.011961301353	204.703414568035	143.708554826584	244.037327406902	171.912493266532	189.566536821828	241.328386030478	226.139095868297	272.020693310934	203.056544112665	0.425775	0.00983683745419987	0.33221	ZFP1	16	75148492	75172236	+	3761	protein_coding	ZFP1 zinc finger protein [Source:HGNC Symbol;Acc:HGNC:23328]
ENSG00000117069	10.8572311252433	13.0276925673647	41.4000516278961	24.5519741109921	32.9266140276694	31.0014276182557	24.6802850809873	11.1204784520541	1.76468460834513	19.0457120854509	0	0.886146872507898	15.797211401819	0	0	23.6957193263078	5.35625070973185	2.12445	0.00985525217127004	0.33221	ST6GALNAC5	1	76867441	77065711	+	4263	protein_coding	ST6 N-acetylgalactosaminide alpha-2,6-sialyltransferase 5 [Source:HGNC Symbol;Acc:HGNC:19342]
ENSG00000188372	126.667696461171	87.9369248297117	46.1508772245399	72.9544373583766	108.657826291309	174.493749737039	227.264291787425	86.1837080034195	95.2929688506369	49.3457085850319	21.1767928741526	62.0302810755528	60.2268684694351	18.9690434434437	0	116.288688961624	43.8630947568933	1.39965	0.00985680458994317	0.33221	ZP3	7	76397518	76442071	+	2716	protein_coding	zona pellucida glycoprotein 3 [Source:HGNC Symbol;Acc:HGNC:13189]
ENSG00000103222	1469.34527894959	1392.3346431371	1125.94566640458	1265.47889417799	1159.01681377396	1152.36735232431	1525.03594896268	1356.6983711506	2323.20728688636	1836.17978787461	1359.34841877894	1746.59548571307	1781.1355855551	1710.37541715051	1197.02961412952	1305.7778711101	1707.6959422983	-0.387732	0.00986829193845872	0.33221	ABCC1	16	15949577	16143074	+	7575	protein_coding	ATP binding cassette subfamily C member 1 [Source:HGNC Symbol;Acc:HGNC:51]
ENSG00000162614	721.101100568239	861.45617101699	306.767595669	236.400436440124	205.791337672934	509.309168014201	403.11132298946	1045.32497449309	95.2929688506369	209.50283293996	298.491937654723	367.750952090778	296.197713784107	364.627168412863	289.45804271142	536.157763358005	274.474516634927	0.966151	0.00987943713841777	0.33221	NEXN	1	77888513	77943895	+	4436	protein_coding	nexilin F-actin binding protein [Source:HGNC Symbol;Acc:HGNC:29557]
ENSG00000171522	346.526626747347	539.020779974714	525.984262485565	491.039482219843	419.814328852784	376.445906793105	424.706572435324	490.691111696888	1687.92082788211	500.382799335938	1039.67968825006	493.583807986899	583.509496154691	571.178974797028	422.126312287488	451.778633900696	756.911700956317	-0.744807	0.00988047907758008	0.33221	PTGER4	5	40679498	40693735	+	3961	protein_coding	prostaglandin E receptor 4 [Source:HGNC Symbol;Acc:HGNC:9596]
ENSG00000184922	2182.30345617389	2822.12390240538	1628.17580090693	2403.98900795343	2867.90808181	886.640829882113	2550.29612503536	1505.43477044683	12541.6135115088	4958.81085570286	2205.41171503675	4299.58462540832	2070.42201935091	2045.49518465135	2155.8593806111	2105.85899682674	4325.31389889573	-1.03853	0.00990215715171323	0.332469	FMNL1	17	45221444	45247320	+	7576	protein_coding	formin like 1 [Source:HGNC Symbol;Acc:HGNC:1212]
ENSG00000153714	440.622629832789	518.665010338207	610.820433854204	592.05331856221	293.046864846257	424.2766808327	323.928741687959	868.787379066728	9.7057653458982	173.142837140463	468.914699356237	153.303408943866	213.262353924557	260.297429473922	277.397290931778	509.025132377632	222.289112159532	1.19616	0.00994557242833164	0.332943	LURAP1L	9	12775021	12822131	+	2132	protein_coding	leucine rich adaptor protein 1 like [Source:HGNC Symbol;Acc:HGNC:31452]
ENSG00000188693	0	0	6.10820433854204	5.6118797967982	13.1706456110677	1.77151014961461	0	6.95029903253383	0	0	0	0	0	0	0	4.20156736606955	0	4.48343	0.00995246425462612	0.332943	CYP51A1-AS1	7	92134604	92180725	+	2957	antisense	CYP51A1 antisense RNA 1 [Source:HGNC Symbol;Acc:HGNC:50694]
ENSG00000172318	3.61907704174775	8.14230785460293	9.50165119328762	7.01484974599775	0	0	2.05669042341561	0	0	0	0	0	0	0	0	3.79182203238146	0	4.37198	0.00995823353178858	0.332943	B3GALT1	2	167868948	167874041	+	5094	protein_coding	beta-1,3-galactosyltransferase 1 [Source:HGNC Symbol;Acc:HGNC:916]
ENSG00000117569	1280.24850351827	977.891173337812	832.751858154565	867.035428605322	903.835555059524	1232.97106413177	917.283928843363	1149.57945998109	620.286639833312	434.588521222562	896.484231672461	525.485095397183	617.078570383556	752.438723256601	1108.08156975466	1020.19962145396	707.777621645762	0.528887	0.0100229835611282	0.334107	PTBP2	1	96721665	96823738	+	12937	protein_coding	polypyrimidine tract binding protein 2 [Source:HGNC Symbol;Acc:HGNC:17662]
ENSG00000111305	0	3.25692314184117	0	1.40296994919955	0	0	0	0	6.17639612920794	1.73142837140463	4.03367483317193	1.7722937450158	3.94930285045476	4.21534298743194	9.04556383473189	0.58248663638009	4.41771467877413	-2.73288	0.0100246378455895	0.334107	GSG1	12	13083560	13103683	-	3005	protein_coding	germ cell associated 1 [Source:HGNC Symbol;Acc:HGNC:19716]
ENSG00000162374	9.04769260436938	47.225385556697	6.78689370949116	6.31336477139798	21.4022991179851	12.4005710473023	35.9920824097732	6.95029903253383	3.52936921669025	3.46285674280926	6.05051224975789	1.7722937450158	7.89860570090952	7.37685022800589	15.0759397245531	18.2648235311937	6.45234680110597	1.53916	0.0100351451663527	0.334107	ELAVL4	1	50048014	50203786	+	6963	protein_coding	ELAV like RNA binding protein 4 [Source:HGNC Symbol;Acc:HGNC:3315]
ENSG00000023445	1539.91728126367	1047.9150208874	2399.16692630512	1841.39805832441	1738.52522066094	567.769002951483	1298.80000238696	1355.3083113441	2893.20041538184	2272.49973746858	893.458975547582	3930.06137957253	1552.07602022872	4256.4425815594	2936.79305834295	1473.59997801551	2676.36173830023	-0.860868	0.0100866400288093	0.33481	BIRC3	11	102317450	102339403	+	7518	protein_coding	baculoviral IAP repeat containing 3 [Source:HGNC Symbol;Acc:HGNC:591]
ENSG00000073282	116.715234596365	39.8973084875544	32.5770898055576	60.3277078155807	49.389921041504	14.1720811969169	18.5102138107405	43.0918540017097	44.9994575128007	53.6742795135435	86.7240089131965	31.9012874102843	22.7084913901149	193.905777421869	565.347739670743	46.8351763444911	142.75157740465	-1.60392	0.0101049746885837	0.33481	TP63	3	189631416	189897279	+	7454	protein_coding	tumor protein p63 [Source:HGNC Symbol;Acc:HGNC:15979]
ENSG00000233122	0	0	0	4.91039482219843	0	3.54302029922922	0	0	15.8821614751061	12.1199985998324	2.01683741658596	7.08917498006318	2.96197713784107	9.48452172172186	3.01518794491063	1.05667689017846	7.50997989658018	-2.72931	0.0101100773480575	0.33481	CTAGE7P	10	130106046	130108481	+	2436	processed_pseudogene	CTAGE family member 7, pseudogene [Source:HGNC Symbol;Acc:HGNC:25111]
ENSG00000135604	221.66846880705	424.214239224813	133.701806076976	245.519741109921	429.692313061085	58.4598349372822	208.754077976685	187.658073878413	1998.50531895086	459.694232607929	364.039153693767	331.418930317954	411.714822159909	152.806183294408	318.102328188071	238.708569384028	576.611567030413	-1.27361	0.0101181986046137	0.33481	STX11	6	144150526	144188370	+	1926	protein_coding	syntaxin 11 [Source:HGNC Symbol;Acc:HGNC:11429]
ENSG00000156232	300.383394465063	547.163087829317	371.921775280115	372.488521512481	451.09461217907	328.615132753511	347.580681557238	357.245370272239	1277.63165644187	486.531372364701	500.175679313319	599.921432687847	429.486684986955	426.803477477484	494.490822965343	384.561571981129	602.148732319646	-0.647779	0.010136869749124	0.33481	WHAMM	15	82809628	82836108	+	5123	protein_coding	WAS protein homolog associated with actin, golgi membranes and microtubules [Source:HGNC Symbol;Acc:HGNC:30493]
ENSG00000166889	813.387565132807	894.839633220862	866.007637331072	878.259188198919	907.128216462291	661.659040881058	873.065084739927	968.871685135215	1259.98481035842	1058.76844911393	1043.71336308324	1066.92083449951	1113.70340382824	963.205872628198	847.267812519887	857.902256387769	1050.50922086163	-0.294159	0.0101525844584241	0.33481	PATL1	11	59636716	59668980	-	4278	protein_coding	PAT1 homolog 1, processing body mRNA decay factor [Source:HGNC Symbol;Acc:HGNC:26721]
ENSG00000233780	18.0953852087388	7.32807706914264	0	4.91039482219843	26.3412912221355	0.885755074807306	11.3117973287859	8.34035883904059	0	1.73142837140463	0	0	0.98732571261369	4.21534298743194	4.52278191736594	9.65163244560613	1.63669699840231	2.61138	0.0101547065569777	0.33481	HNRNPA1P30	13	20938564	20949599	-	1624	transcribed_processed_pseudogene	heterogeneous nuclear ribonucleoprotein A1 pseudogene 30 [Source:HGNC Symbol;Acc:HGNC:39548]
ENSG00000172476	69.6672330536442	40.7115392730147	41.4000516278961	29.4623689331906	41.1582675345867	56.6883247876676	95.636104688826	27.8011961301353	2.64702691251769	20.7771404568556	29.2441425404965	20.3813780676816	24.6831428153422	43.2072656211774	27.1366915041957	50.3156357536201	24.0109697026095	1.07502	0.0101748039536817	0.335009	RAB40A	X	103499130	103519489	-	4018	protein_coding	RAB40A, member RAS oncogene family [Source:HGNC Symbol;Acc:HGNC:18283]
ENSG00000285768	7.2381540834955	13.0276925673647	5.42951496759293	9.82078964439686	18.1096377152182	1.77151014961461	16.4535233873249	29.1912559366421	0	0	10.0841870829298	0	5.92395427568214	1.05383574685798	0	12.6302598064562	2.43742530078142	2.35588	0.0102302385314507	0.335753	AC232323.2	8	85851446	85861562	-	1661	lincRNA	uncharacterized LOC105375622 [Source:NCBI gene;Acc:105375622]
ENSG00000232082	1.80953852087388	6.51384628368235	0	0.701484974599775	6.58532280553387	5.31453044884384	22.6235946575717	0	0	0	1.00841870829298	1.7722937450158	0	0	0	5.44353971138818	0.397244636186968	3.62929	0.0102360398612058	0.335753	RPS6KA2-IT1	6	166460663	166465383	-	579	sense_intronic	RPS6KA2 intronic transcript 1 [Source:HGNC Symbol;Acc:HGNC:41378]
ENSG00000148950	297.669086683752	312.664621616753	266.724922783003	220.967766998929	242.01061310337	310.900031257364	279.709897584523	237.700226912657	174.703776226168	215.562832239876	225.885790657628	222.422864999482	212.275028211943	251.866743499058	212.570750116199	271.043395867544	216.469683707194	0.327407	0.0102501782598308	0.335753	IMMP1L	11	31432401	31509645	-	3901	protein_coding	inner mitochondrial membrane peptidase subunit 1 [Source:HGNC Symbol;Acc:HGNC:26317]
ENSG00000132031	187.287236910446	121.320387033584	147.275593495958	166.251938980147	329.266140276694	202.837912130873	241.661124751334	175.147535619852	5.29405382503538	60.599992999162	153.279643660533	80.6393653982187	91.8212912730731	124.352618129242	126.637893686246	196.380983649861	91.8035512816445	1.09797	0.0102538437473409	0.335753	MATN3	2	19992111	20012694	-	3118	protein_coding	matrilin 3 [Source:HGNC Symbol;Acc:HGNC:6909]
ENSG00000267416	9.04769260436938	14.6561541382853	3.39344685474558	3.50742487299888	13.1706456110677	7.08604059845845	3.08503563512342	8.34035883904059	3.52936921669025	1.73142837140463	0	0.886146872507898	6.91127998829583	1.05383574685798	0	7.78584989426116	2.0160085993938	1.8889	0.0102878687691171	0.336405	AC025048.4	17	60079309	60088695	+	699	lincRNA	uncharacterized LOC105371849 [Source:NCBI gene;Acc:105371849]
ENSG00000198482	67.8576945327703	54.5534626258397	103.160784384266	110.133141012165	69.1458894581057	57.5740798624749	82.2676169366245	98.6942462619803	310.584491068742	87.4371327559338	138.153363036139	147.100380836311	73.062102733413	92.7375457235026	131.160675603612	80.4233643842782	140.033670251093	-0.800082	0.010338444672952	0.337073	ZNF808	19	52527652	52564464	+	5008	protein_coding	zinc finger protein 808 [Source:HGNC Symbol;Acc:HGNC:33230]
ENSG00000175567	1111.961421077	2196.79465917187	1142.23421130736	1410.68628392015	1697.36695312636	929.157073472864	1450.99509371971	1800.12744942626	8717.54196522493	3407.45103492431	1741.53910922198	1158.19396236782	3274.95938873961	1002.19779526194	1717.1495346266	1467.4153931527	3002.71897005246	-1.0332	0.0103427565789811	0.337073	UCP2	11	73974667	73983307	-	3237	protein_coding	uncoupling protein 2 [Source:HGNC Symbol;Acc:HGNC:12518]
ENSG00000137760	349.240934528658	260.553851347294	313.554489378491	326.891998163495	265.059242922738	360.502315446574	378.431037908473	355.855310465732	292.055302681119	217.294260611281	336.811848569856	217.105983764435	220.173633912853	252.920579245916	208.047968198833	326.261147520182	249.201368140613	0.388078	0.0103527255409894	0.337073	ALKBH8	11	107502726	107565746	-	4506	protein_coding	alkB homolog 8, tRNA methyltransferase [Source:HGNC Symbol;Acc:HGNC:25189]
ENSG00000238222	0	0	0	1.40296994919955	0	0	0	0	0	7.79142767132083	2.01683741658596	18.6090843226659	3.94930285045476	0	1.50759397245531	0.175371243649944	4.83917803335468	-4.0605	0.0103906484473495	0.337073	MKRN4P	X	40834485	40836005	+	1521	processed_pseudogene	makorin ring finger protein 4, pseudogene [Source:HGNC Symbol;Acc:HGNC:7115]
ENSG00000177133	46.1432322822838	14.6561541382853	8.14427245138939	20.3430642633935	26.3412912221355	64.6601204609333	45.2471893151435	25.0210765171218	4.41171152086282	32.0314248709856	4.03367483317193	8.86146872507898	15.797211401819	0	6.03037588982126	31.3195500813358	10.1665524631057	1.60943	0.0103949404238476	0.337073	LINC00982	1	3059615	3068437	-	5600	antisense	long intergenic non-protein coding RNA 982 [Source:HGNC Symbol;Acc:HGNC:48664]
ENSG00000115461	1364.3920447389	720.59424513236	454.043189164958	1662.51938980147	842.921319108336	3751.17274180894	1695.74125410617	193.21831310444	3.52936921669025	130.72284204105	924.719955504665	841.839528882503	503.536113432982	157.02152628184	161.312555052719	1335.5753121207	388.954555773207	1.77972	0.010401120090358	0.337073	IGFBP5	2	216672105	216695525	-	6442	protein_coding	insulin like growth factor binding protein 5 [Source:HGNC Symbol;Acc:HGNC:5474]
ENSG00000149925	38.0003089383514	65.9526936222838	71.2623839496571	52.6113730949832	74.0848815622561	26.5726522442192	31.878701562942	30.5813157431488	147.351164796818	119.468557626919	90.7576837463684	127.605149641137	67.1381484577309	35.8304153931715	48.2430071185701	48.8680388397302	90.9134466829594	-0.899971	0.0104074250765729	0.337073	ALDOA	16	30064164	30070457	+	3916	protein_coding	aldolase, fructose-bisphosphate A [Source:HGNC Symbol;Acc:HGNC:414]
ENSG00000052749	1000.67480204325	1068.2707905239	625.072910644136	872.647308402121	826.458012094501	752.89181358621	1104.44275737418	1221.86256991945	1581.15740907723	1467.38554476542	1367.41576844528	1068.69312824452	1166.03166659677	1047.51273237684	1126.17269742412	934.040120573469	1260.62413527574	-0.433511	0.010442049160205	0.337648	RRP12	10	97356358	97426076	-	8529	protein_coding	ribosomal RNA processing 12 homolog [Source:HGNC Symbol;Acc:HGNC:29100]
ENSG00000158373	12.6667696461171	1.62846157092059	47.5082559664381	45.5965233489854	83.9628657705569	10.6290608976877	39.0771180448966	45.8719736147233	282.34953733522	62.3314213705667	34.2862360819614	132.922030876185	69.1127998829583	41.0995941274614	91.9632323197742	35.8676286075407	102.00926457059	-1.51745	0.0104591861505366	0.337648	HIST1H2BD	6	26158146	26171349	+	871	protein_coding	histone cluster 1 H2B family member d [Source:HGNC Symbol;Acc:HGNC:4747]
ENSG00000127084	799.816026226253	667.66924407744	728.91238439935	1018.55618311887	1399.38109617595	600.541940719354	969.729534640461	587.995298152362	7345.49968223659	2104.55118544233	625.219599141649	1959.27073511496	713.836490219698	449.987863908359	969.382924288767	846.575213438755	2023.96406862176	-1.2578	0.0104886249976582	0.337648	FGD3	9	92947451	93036236	+	5890	protein_coding	FYVE, RhoGEF and PH domain containing 3 [Source:HGNC Symbol;Acc:HGNC:16027]
ENSG00000104447	598.052481148816	511.336933269064	789.315738413822	706.395369421974	625.605666525718	525.252759360733	546.051307416845	638.037451186605	654.697989696042	695.168491118959	610.093318517254	991.598350336338	887.605815639707	1101.25835546659	850.283000464797	617.505963342947	827.243617319956	-0.42121	0.0104943797811473	0.337648	TRPS1	8	115408496	115809673	-	11072	protein_coding	transcriptional repressor GATA binding 1 [Source:HGNC Symbol;Acc:HGNC:12340]
ENSG00000138777	1139.1044988901	1102.46848351324	973.240557941032	963.138870125492	1000.96906644115	1037.21919259936	746.578623699867	982.772283200283	669.697808866976	829.354189902818	861.189576882207	852.473291352598	764.190101562996	688.154742698264	948.276608674393	993.186447051315	801.905188562893	0.309738	0.0104960931466455	0.337648	PPA2	4	105369077	105474081	-	4654	protein_coding	pyrophosphatase (inorganic) 2 [Source:HGNC Symbol;Acc:HGNC:28883]
ENSG00000177302	864.959412977712	645.685012870013	735.020588737892	688.15676008238	643.715304240936	771.492670157164	686.934601420814	843.766302549607	1037.63454970693	896.879896387598	782.532917635354	949.063300455958	836.264878583795	957.936693893908	797.517211428861	734.966331629565	893.975635441773	-0.283327	0.0105492518766882	0.338085	TOP3A	17	18271428	18315007	-	6476	protein_coding	DNA topoisomerase III alpha [Source:HGNC Symbol;Acc:HGNC:11992]
ENSG00000124091	0	0	4.07213622569469	0.701484974599775	0	3.54302029922922	0	2.78011961301353	22.9408999084866	7.79142767132083	6.05051224975789	13.2922030876185	2.96197713784107	0	6.03037588982126	1.38709513906715	8.43819942069231	-2.57503	0.0105497144357081	0.338085	GCNT7	20	56491492	56525925	-	2064	protein_coding	glucosaminyl (N-acetyl) transferase family member 7 [Source:HGNC Symbol;Acc:HGNC:16099]
ENSG00000162892	1713.63297926756	781.661554041882	375.99391150581	390.025645877475	269.998235026889	265.726522442192	602.610294060774	166.807176780812	1019.98770362348	1424.09983548031	301.517193779602	7168.92819858889	660.520901738558	830.422568524092	458.308567626416	570.807039875424	1694.82642419448	-1.5699	0.0105522925380873	0.338085	IL24	1	206897443	206904139	+	1979	protein_coding	interleukin 24 [Source:HGNC Symbol;Acc:HGNC:11346]
ENSG00000127311	225.287545848797	149.818464524694	312.197110636593	309.354873798501	200.852345568783	178.036770036269	245.774505598166	191.828253297934	1549.39308612702	258.848541524992	269.247795114226	420.919764441251	265.590616693082	315.096888310537	186.941652584459	226.643733663717	466.576906399367	-1.04174	0.0105706333056847	0.338218	HELB	12	66302545	66347645	+	13796	protein_coding	DNA helicase B [Source:HGNC Symbol;Acc:HGNC:17196]
ENSG00000112214	191.811083212631	397.344623304623	146.596904125009	285.504384662109	80.6702043677899	312.671541406979	136.769913157138	590.775417765375	0	51.9428511421389	238.995233865437	50.5103717329502	95.7705941235279	60.0686375709051	116.084735879059	267.768009000207	87.6246320448597	1.61278	0.0105919201683276	0.338444	FHL5	6	96562548	96616636	+	2135	protein_coding	four and a half LIM domains 5 [Source:HGNC Symbol;Acc:HGNC:17371]
ENSG00000108771	366.43155047696	433.985008650336	466.259597842043	484.024632473845	643.715304240936	457.04961860057	562.50483080417	369.7559085308	813.519604447103	856.191329659589	395.300133650849	556.50023593496	871.808604237888	581.717332265608	622.636310624045	472.965806452457	671.09622154572	-0.50621	0.010628042502655	0.339143	DHX58	17	42101404	42112733	-	3843	protein_coding	DExH-box helicase 58 [Source:HGNC Symbol;Acc:HGNC:29517]
ENSG00000105552	644.1957134311	663.598090150139	699.050052077589	580.829558968614	694.751555983824	705.946794621423	860.724942199434	704.76032189893	435.877098261246	758.365626675228	506.226191563077	529.915829759723	534.143210524006	533.24088791014	524.642702414449	694.232128666382	546.058792443981	0.345244	0.0106504576783095	0.339403	BCAT2	19	48795062	48811029	-	4553	protein_coding	branched chain amino acid transaminase 2 [Source:HGNC Symbol;Acc:HGNC:977]
ENSG00000090339	1459.39281708478	1126.89540707705	1685.8643974376	1884.8901267496	1331.88153741923	808.694383299071	1062.28060369416	678.349185575301	931.753473206227	2426.59686252359	2811.47135872083	3206.07938473357	1452.35612325474	2951.79392694921	1237.73465138581	1254.7810572921	2145.397968682	-0.77361	0.0106786090705556	0.339487	ICAM1	19	10270835	10286615	+	3706	protein_coding	intercellular adhesion molecule 1 [Source:HGNC Symbol;Acc:HGNC:5344]
ENSG00000115705	60.6195404492748	115.620771535362	9.50165119328762	63.1336477139798	46.0972596387371	5.31453044884384	28.7936659278186	11.1204784520541	10.5881076500708	3.46285674280926	46.3872605814772	5.31688123504739	9.8732571261369	10.5383574685798	6.03037588982126	42.5251931699197	13.1710138134204	1.69206	0.0106951889620806	0.339487	TPO	2	1374066	1543711	+	8453	protein_coding	thyroid peroxidase [Source:HGNC Symbol;Acc:HGNC:12015]
ENSG00000145349	949.102954198347	1455.03041361754	1521.62156966792	1326.50808696818	968.042452413479	1531.47052434183	952.247666041428	1280.24508179273	974.988246110683	547.997079549565	1134.47104682961	599.921432687847	1088.03293530029	765.084752218897	990.489239903142	1248.03359363018	871.569247514289	0.518909	0.0106958707546782	0.339487	CAMK2D	4	113451032	113761927	-	7363	protein_coding	calcium/calmodulin dependent protein kinase II delta [Source:HGNC Symbol;Acc:HGNC:1462]
ENSG00000159337	1.80953852087388	4.88538471276176	0	0	0	0	0	0	0	1.73142837140463	0	7.08917498006318	0	82.1991882549228	205.032780253923	0.836865404204454	42.2932245514733	-5.62949	0.0107578702613531	0.340764	PLA2G4D	15	42067009	42094554	-	5138	protein_coding	phospholipase A2 group IVD [Source:HGNC Symbol;Acc:HGNC:30038]
ENSG00000170374	0	0	19.0033023865752	29.4623689331906	9.87798420830081	7.97179567326576	0	30.5813157431488	1.76468460834513	28.5685681281764	2.01683741658596	116.085240298535	51.3409370559119	265.566608208212	55.7809769808466	12.1120958680602	74.4462646709447	-2.62065	0.0107647388485034	0.340764	SP7	12	53326575	53345315	-	3414	protein_coding	Sp7 transcription factor [Source:HGNC Symbol;Acc:HGNC:17321]
ENSG00000142609	18.0953852087388	45.5969239857764	25.7901960960664	42.0890984759865	19.7559684166016	18.6008565709534	30.8503563512342	1.39005980650677	0	17.3142837140463	11.0926057912228	14.1783499601264	7.89860570090952	3.16150724057395	3.01518794491063	25.271105613983	8.09436290739851	1.63608	0.010792700207356	0.341196	CFAP74	1	1921951	2003837	-	10422	protein_coding	cilia and flagella associated protein 74 [Source:HGNC Symbol;Acc:HGNC:29368]
ENSG00000268858	73.2863100953919	123.763079389965	79.4066564010465	117.147990758162	79.0238736664065	103.633343752455	131.628187098599	72.2831099383518	180.880172355375	169.679980397654	110.926057912228	124.946709023614	215.237005349784	129.621796863532	93.4708262922295	97.5215688875472	146.39464974206	-0.58494	0.0108390435578348	0.342206	AL118506.1	20	63861212	63864293	-	3082	antisense	novel transcript, antisense to ABHD16B
ENSG00000198734	152.001235753406	60.2530781240617	549.738390468784	325.489028214296	306.217510457325	26.5726522442192	164.535233873249	97.3041864554736	529.405382503538	949.688461715439	223.868953241042	801.962919619648	477.865644905026	388.865390590596	242.722629565306	210.263914448852	516.339911734371	-1.29588	0.0108725426695848	0.342433	F5	1	169514166	169586588	-	7158	protein_coding	coagulation factor V [Source:HGNC Symbol;Acc:HGNC:3542]
ENSG00000235621	3.61907704174775	4.88538471276176	4.07213622569469	1.40296994919955	3.29266140276694	2.65726522442192	6.17007127024684	0	110.29278802157	8.65714185702315	2.01683741658596	0	3.94930285045476	16.8613719497278	0	3.26244572835493	20.2539202993374	-2.63017	0.010877460989069	0.342433	LINC00494	20	48359950	48370629	+	4204	lincRNA	long intergenic non-protein coding RNA 494 [Source:HGNC Symbol;Acc:HGNC:27657]
ENSG00000137171	307.621548548559	315.921544758594	281.656088943883	308.653388823901	209.0839990757	419.847905458663	345.523991133823	376.706207563333	479.111871165702	354.077101952247	378.157015609868	415.602883206204	426.524707849114	473.172250339235	404.035184618024	320.626834288307	418.668716391485	-0.383306	0.0108893731329909	0.342433	KLC4	6	43040777	43075099	+	6421	protein_coding	kinesin light chain 4 [Source:HGNC Symbol;Acc:HGNC:21624]
ENSG00000171401	0	0	0	0	0	0	0	0	0	0	0	0	3.94930285045476	40.0457583806034	194.479622446736	0	34.0678119539705	-7.58832	0.0109343727222836	0.342749	KRT13	17	41500981	41505705	-	2913	protein_coding	keratin 13 [Source:HGNC Symbol;Acc:HGNC:6415]
ENSG00000241560	0	0	0	0	0	1.77151014961461	0	0	13.2351345625885	0	4.03367483317193	1.7722937450158	3.94930285045476	0	7.53796986227657	0.221438768701827	4.36119655050107	-3.8988	0.0109404907227994	0.342749	ZBTB20-AS1	3	114351811	114388978	+	2035	antisense	ZBTB20 antisense RNA 1 [Source:HGNC Symbol;Acc:HGNC:40640]
ENSG00000137393	444.241706874536	674.997321146583	442.505469858823	527.516700899031	673.349256865838	459.706883824992	295.13507576014	365.585729111279	944.106265464643	853.594187102482	536.478752811867	726.640435456476	580.547519016849	652.324327305093	593.992025147394	485.379768042653	698.240501757829	-0.525611	0.0109774187371117	0.342749	RNF144B	6	18387350	18468874	+	5175	protein_coding	ring finger protein 144B [Source:HGNC Symbol;Acc:HGNC:21578]
ENSG00000126003	242.478161797099	311.850390831292	327.128276797474	359.861791969685	321.034486769776	221.438768701827	286.908314066478	305.813157431488	1007.63491136507	561.848506520802	223.868953241042	512.192892309565	340.627370851723	355.142646691141	370.868117224007	297.06416854564	481.740485457621	-0.698413	0.0109813145526519	0.342749	PLAGL2	20	32192503	32207791	-	5705	protein_coding	PLAG1 like zinc finger 2 [Source:HGNC Symbol;Acc:HGNC:9047]
ENSG00000184347	1251.29588718428	953.464249774003	1133.41124948502	1471.71547671033	722.739177907343	3772.43086360432	1953.85590224483	1196.84149340233	1.76468460834513	274.431396867634	1347.24739427942	311.037552250272	515.384021984346	715.554472116572	447.755409819228	1556.96928753906	516.167847417974	1.593	0.0109864372569455	0.342749	SLIT3	5	168661733	169301129	-	14260	protein_coding	slit guidance ligand 3 [Source:HGNC Symbol;Acc:HGNC:11087]
ENSG00000008086	645.100482691537	394.901930948242	543.630186130242	459.472658362853	355.607431498829	387.074967690793	327.013777323082	556.023922602706	116.469184150778	154.962839240714	405.384320733779	409.399855098649	233.008868176831	390.973062084312	238.19984764794	458.603169656035	278.342568161858	0.72088	0.0110063648094721	0.342749	CDKL5	X	18425583	18653629	+	17075	protein_coding	cyclin dependent kinase like 5 [Source:HGNC Symbol;Acc:HGNC:11411]
ENSG00000147324	545.575864043473	625.329243233505	521.233436888921	567.501344451218	554.813446366229	342.787213950427	495.662392043163	462.889915566753	1463.80588262228	536.742795135435	675.640534556298	603.466020177878	869.833952812661	543.77924537872	699.523603219266	514.474107067961	770.398861986077	-0.582686	0.0110077173340796	0.342749	MFHAS1	8	8783354	8893645	-	6883	protein_coding	malignant fibrous histiocytoma amplified sequence 1 [Source:HGNC Symbol;Acc:HGNC:16982]
ENSG00000070495	869.483259279897	1016.16002025445	836.145305009311	634.843902012797	691.458894581057	545.625126081301	841.186383176985	978.602103780763	1009.39959597341	1361.76841410974	861.189576882207	1209.59048097328	983.376409763235	1112.85054868203	958.82976648158	801.688124272069	1071.00068469507	-0.418349	0.0110265328597362	0.342749	JMJD6	17	76712832	76726799	-	5969	protein_coding	jumonji domain containing 6, arginine demethylase and lysine hydroxylase [Source:HGNC Symbol;Acc:HGNC:19355]
ENSG00000129159	49.7623093240316	54.5534626258397	10.8590299351859	4.20890984759865	54.3289131456545	24.8011420946046	199.498971071314	29.1912559366421	7.05873843338051	34.6285674280926	16.1346993326877	7.08917498006318	11.8479085513643	20.0228791903017	27.1366915041957	53.4004992476089	17.7026656314408	1.59491	0.0110290019641707	0.342749	KCNC1	11	17734774	17856804	+	14417	protein_coding	potassium voltage-gated channel subfamily C member 1 [Source:HGNC Symbol;Acc:HGNC:6233]
ENSG00000131188	124.858157940297	231.241543070723	124.200154883688	100.312351367768	125.121133305144	89.4612625555379	98.7211403239494	44.4819138082165	410.289171440242	255.385684782183	140.170200452725	228.625893107038	149.086182604667	207.605642131023	101.008796154506	117.299707156916	213.167367238912	-0.861235	0.0110623793657491	0.343107	PRR7	5	177446445	177456286	+	1772	protein_coding	proline rich 7, synaptic [Source:HGNC Symbol;Acc:HGNC:28130]
ENSG00000130803	560.052172210464	608.230396738839	574.171207822952	533.128580695829	505.423525324725	581.9410841484	479.208868655838	685.299484607835	1396.74786750517	701.228490418875	640.345879766044	785.126129041998	757.2788215747	630.193776621075	612.083152816858	565.93191502561	789.000588249245	-0.480244	0.0110693497359191	0.343107	ZNF317	19	9140380	9163424	+	5065	protein_coding	zinc finger protein 317 [Source:HGNC Symbol;Acc:HGNC:13507]
ENSG00000265185	0	8.14230785460293	1.35737874189823	4.20890984759865	0	1.77151014961461	2.05669042341561	0	48.528826729491	0	31.2609799570824	5.31688123504739	14.8098856892053	0	9.04556383473189	2.19209962714126	15.5660196350797	-2.78012	0.0111245983011196	0.344371	SNORD3B-1	17	19061912	19062669	+	758	snoRNA	small nucleolar RNA, C/D box 3B-1 [Source:HGNC Symbol;Acc:HGNC:10168]
ENSG00000116299	32.5716933757298	45.5969239857764	43.4361197407434	89.7900767487713	111.950487694076	34.5444479174849	91.5227238419947	40.3117343886962	254.996925905871	349.748531023735	50.4209354146491	236.601214959609	45.4169827802297	53.7456230897572	45.2278191736594	61.2155259616591	148.022576049644	-1.27928	0.0111673597631858	0.344393	KIAA1324	1	109113679	109206781	+	9300	protein_coding	KIAA1324 [Source:HGNC Symbol;Acc:HGNC:29618]
ENSG00000188906	407.146167196622	378.617315239036	334.593859877914	395.637525674273	567.984091977297	139.063546744747	306.446873088926	168.197236587319	1966.74099600064	1072.61987608517	249.079420948367	1070.46542198954	373.209119367975	118.029603648094	578.916085422841	337.210827048267	775.580074780376	-1.20221	0.0111702512630585	0.344393	LRRK2	12	40196744	40369285	+	13491	protein_coding	leucine rich repeat kinase 2 [Source:HGNC Symbol;Acc:HGNC:18618]
ENSG00000140470	18.0953852087388	0.814230785460293	10.8590299351859	2.8059398983991	0	8.85755074807306	0	4.1701794195203	93.5282842422917	5.19428511421389	10.0841870829298	6.20302810755528	8.88593141352321	21.0767149371597	31.6594734215616	5.70028949942217	25.2331291884622	-2.12345	0.0111878026131022	0.344393	ADAMTS17	15	99971589	100342005	-	8242	protein_coding	ADAM metallopeptidase with thrombospondin type 1 motif 17 [Source:HGNC Symbol;Acc:HGNC:17109]
ENSG00000196684	280.478470735451	185.644619084947	238.21996920314	361.966246893484	656.885949852004	76.1749364334283	344.495645922115	111.204784520541	2756.43735823509	592.148503020383	369.081247235232	425.350498803791	341.614696564337	184.421255700147	407.050372562935	281.883827830639	725.157704588845	-1.36439	0.0112157212863519	0.344393	HSH2D	19	16134028	16158575	+	3398	protein_coding	hematopoietic SH2 domain containing [Source:HGNC Symbol;Acc:HGNC:24920]
ENSG00000184363	151.096466492969	76.5376938332676	23.0754386122699	65.9395876123789	55.9752438470379	21.2581217953753	66.8424387610074	22.2409569041082	3.52936921669025	22.5085688282602	17.1431180409807	16.8367905776501	37.5183770793202	446.826356667785	1454.82818341938	60.3707434823017	285.598680547152	-2.2403	0.0112702485720348	0.344393	PKP3	11	392614	404908	+	3787	protein_coding	plakophilin 3 [Source:HGNC Symbol;Acc:HGNC:9025]
ENSG00000125910	207.192160640059	370.475007384433	447.256295455467	551.367190035424	548.228123560695	256.868971694119	449.386857516311	344.734832013678	2808.49555418127	1234.5084288115	311.601380862532	556.50023593496	572.64891331594	253.974414992774	408.55796653539	396.938679787523	878.040984947767	-1.14592	0.0112788970475612	0.344393	S1PR4	19	3172346	3180332	+	1664	protein_coding	sphingosine-1-phosphate receptor 4 [Source:HGNC Symbol;Acc:HGNC:3170]
ENSG00000280202	21.7144622504865	43.9684624148558	65.1541796111151	65.2381026377791	49.389921041504	48.7165291144018	22.6235946575717	66.7228707123247	237.35007982242	25.1057113853671	107.900801787349	77.980924780695	64.1761713198898	66.391652052053	108.546766016783	47.9410153050049	98.2074438806509	-1.03448	0.0113043378680255	0.344393	AC005831.1	12	3610307	3612003	-	1697	TEC	TEC
ENSG00000168792	251.525854401469	291.494621194785	291.157740137171	255.340530754318	228.839967492302	285.213134087953	352.722407615778	227.96980826711	747.343931634161	309.925678481429	316.643474403996	308.379111632748	464.043084928434	455.257042642649	254.783381344948	273.033007993861	408.053672152624	-0.579709	0.0113194665423646	0.344393	ABHD15	17	29560547	29567137	-	3592	protein_coding	abhydrolase domain containing 15 [Source:HGNC Symbol;Acc:HGNC:26971]
ENSG00000177731	4015.36597781913	3339.97468195812	3700.21445041458	3551.61842639866	3727.29270793217	3019.53905001811	3342.12193805037	3926.91895338161	7058.73843338051	5134.55083540043	4123.42409821	4760.38099911243	4050.99739885397	3794.8625244356	3773.50771305565	3577.88077324659	4670.92314320694	-0.384885	0.0113407530867372	0.344393	FLII	17	18244836	18258916	-	6465	protein_coding	FLII, actin remodeling protein [Source:HGNC Symbol;Acc:HGNC:3750]
ENSG00000243055	5.42861556262163	3.25692314184117	2.71475748379646	10.5222746189966	0	4.42877537403653	22.6235946575717	2.78011961301353	21.1762153001415	48.4799943993296	6.05051224975789	48.7380779879344	29.6197713784107	5.26917873428992	3.01518794491063	6.46938255648471	23.192705427825	-1.83347	0.0113656380323691	0.344393	GK-AS1	X	30699998	30724174	-	651	antisense	GK antisense RNA 1 [Source:HGNC Symbol;Acc:HGNC:40255]
ENSG00000260123	16.2858466878649	11.3992309964441	5.42951496759293	4.20890984759865	9.87798420830081	17.7151014961461	28.7936659278186	29.1912559366421	0	2.59714255710694	1.00841870829298	2.65844061752369	3.94930285045476	17.9152076965857	0	15.362688758551	4.0183589185663	1.92395	0.0113918785488836	0.344393	AC013565.1	15	89041223	89082819	+	597	lincRNA	uncharacterized LOC102724566 [Source:NCBI gene;Acc:102724566]
ENSG00000177990	1841.20544498917	1221.34617819044	1130.69649200123	1380.52243001236	1009.20071994807	1812.25488305575	1251.4961226484	1616.63955496737	86.4695458089112	521.159939792793	1288.75910919843	479.405458026773	479.840296330253	547.994588366152	1460.8585593092	1407.9202282266	694.926785261788	1.01942	0.0114042072722054	0.344393	DPY19L2	12	63558913	63668939	-	5646	protein_coding	dpy-19 like 2 [Source:HGNC Symbol;Acc:HGNC:19414]
ENSG00000198300	78.7149256580136	109.106925251679	42.0787409988452	59.6262228409809	80.6702043677899	49.6022841892091	165.563579084957	84.7936481969127	0	34.6285674280926	27.2273051239105	54.9411060954897	43.4423313550023	30.5612366588816	51.2581950634807	83.7695663235484	34.5798202464082	1.27884	0.0114228348690748	0.344393	PEG3	19	56810077	56840728	-	9769	protein_coding	paternally expressed 3 [Source:HGNC Symbol;Acc:HGNC:8826]
ENSG00000203943	8.14292334393244	18.7273080655867	18.3246130156261	18.2386093395942	3.29266140276694	18.6008565709534	19.5385590224483	15.2906578715744	3.52936921669025	9.52285604272546	6.05051224975789	8.86146872507898	1.97465142522738	12.6460289622958	3.01518794491063	15.0195235790603	6.51429636666949	1.20914	0.0114421006509137	0.344393	SAMD13	1	84298366	84389957	+	3455	protein_coding	sterile alpha motif domain containing 13 [Source:HGNC Symbol;Acc:HGNC:24582]
ENSG00000225190	872.197567061208	1032.44463596365	1058.75541868062	1125.18189925804	1305.54024619709	892.841115405765	1059.19556805904	828.475644678032	1498.21723248501	1957.37977387293	1063.8817372491	1784.69980123091	1616.25219154861	972.69039434992	1029.68668318698	1021.82901191293	1417.54397341764	-0.473063	0.0114800827325654	0.344393	PLEKHM1	17	45435900	45490749	-	9233	protein_coding	pleckstrin homology and RUN domain containing M1 [Source:HGNC Symbol;Acc:HGNC:29017]
ENSG00000183662	0	0	0.678689370949116	0	0	0	0	0	3.52936921669025	5.19428511421389	4.03367483317193	0	3.94930285045476	4.21534298743194	0	0.0848361713686395	2.98885357170897	-3.72833	0.0114943131191986	1	FAM19A1	3	68004216	68545625	+	2933	protein_coding	family with sequence similarity 19 member A1, C-C motif chemokine like [Source:HGNC Symbol;Acc:HGNC:21587]
ENSG00000168575	1024.19880281461	1128.52386864797	834.109236896463	871.945823427521	775.421760351614	790.979281802924	661.225971128119	938.290369392067	455.288628953043	528.085653278412	896.484231672461	712.46208549635	659.533576025945	719.769815104004	598.51480706476	878.086889307661	652.876971084996	0.428041	0.0115055362030975	0.344393	SLC20A2	8	42416475	42541926	-	6641	protein_coding	solute carrier family 20 member 2 [Source:HGNC Symbol;Acc:HGNC:10947]
ENSG00000211747	36.1907704174775	17.0988464946662	22.3967492413208	19.6415792887937	11.5243149096843	31.887182693063	20.5669042341561	36.1415549691759	347.64286784399	37.2257099851995	19.1599554575667	24.8121124302211	21.7211656775012	9.48452172172186	58.7961649257573	24.4309877810422	74.1203568631368	-1.60199	0.01151515235981	0.344393	TRBV20-1	7	142626649	142627399	+	413	TR_V_gene	T cell receptor beta variable 20-1 [Source:HGNC Symbol;Acc:HGNC:12196]
ENSG00000172824	33.4764626361667	13.0276925673647	18.3246130156261	72.2529523837769	46.0972596387371	34.5444479174849	40.1054632566044	30.5813157431488	215.291522218105	58.8685646277574	34.2862360819614	51.3965186054581	55.2902399063666	60.0686375709051	60.3037588982126	36.0512758948637	76.5007825583952	-1.08913	0.0115374627980822	0.344393	CES4A	16	66988589	67009758	+	4340	protein_coding	carboxylesterase 4A [Source:HGNC Symbol;Acc:HGNC:26741]
ENSG00000169129	973.531724230145	669.297705648361	1018.03405642367	918.945316725706	749.080469129478	934.471603921708	718.813302983756	1622.1997941934	294.702329593636	786.934194803404	878.332694923188	775.378513444411	452.19517637707	496.356636770111	560.824957753377	950.546746657028	606.389214809314	0.648085	0.0115526970448958	0.344393	AFAP1L2	10	114294824	114404756	-	5789	protein_coding	actin filament associated protein 1 like 2 [Source:HGNC Symbol;Acc:HGNC:25901]
ENSG00000273542	1.80953852087388	0	0.678689370949116	0	0	0	0	2.78011961301353	18.5291883876238	3.46285674280926	2.01683741658596	3.54458749003159	3.94930285045476	2.10767149371597	0	0.658543438104565	4.8014920544602	-2.97979	0.0115542006636264	0.344393	HIST1H4K	6	27831216	27831527	-	312	protein_coding	histone cluster 1 H4 family member k [Source:HGNC Symbol;Acc:HGNC:4784]
ENSG00000135824	0	19.541538851047	0	0	19.7559684166016	12.4005710473023	0	11.1204784520541	0	0	0	0	1.97465142522738	0	0	7.85231959587563	0.282093060746768	4.57034	0.0115843476755474	0.344393	RGS8	1	182641816	182684576	-	6685	protein_coding	regulator of G protein signaling 8 [Source:HGNC Symbol;Acc:HGNC:16810]
ENSG00000187446	1670.20405476659	1847.48965220941	2019.10087857362	1816.14459923882	1560.72150491153	1855.65688172131	1838.68123853356	1852.94972207352	2128.20963766422	2175.53974866992	1775.82534530394	2396.14114326136	2014.14445373193	2083.43327153824	2277.97449237998	1807.61856650354	2121.60972750708	-0.230191	0.0115848801399275	0.344393	CHP1	15	41230839	41281890	+	3950	protein_coding	calcineurin like EF-hand protein 1 [Source:HGNC Symbol;Acc:HGNC:17433]
ENSG00000048740	544.671094783036	911.938479715529	664.436894159184	868.438398554522	856.091964719403	497.794352041706	747.606968911575	811.794926999951	5918.75217638956	1179.96843511226	702.867839680209	772.720072826887	973.503152637098	505.841158491833	1150.29420098341	737.846634985613	1600.56386230303	-1.11743	0.0115981323825485	0.344393	CELF2	10	10798397	11336675	+	10978	protein_coding	CUGBP Elav-like family member 2 [Source:HGNC Symbol;Acc:HGNC:2550]
ENSG00000010310	222.573238067487	116.435002320822	433.003818665536	308.653388823901	365.48541570713	137.292036595132	198.470625859607	105.644545294514	193.232964613791	1547.03124985004	262.188864156175	1284.02681826394	337.665393713882	132.783304104106	283.427666821599	235.944758916766	577.193751646219	-1.29092	0.0116030953689226	0.344393	GIPR	19	45668244	45683724	+	4736	protein_coding	gastric inhibitory polypeptide receptor [Source:HGNC Symbol;Acc:HGNC:4271]
ENSG00000128383	335.669395622104	273.581543914659	277.583952718188	424.398409632864	1201.82141200993	66.431630610548	266.341409832322	208.508970976015	1271.45526031266	1437.08554826584	379.165434318161	1813.05650115116	750.367541586404	227.628521321325	600.022401037215	381.792090664579	925.540172570396	-1.27917	0.0116173854592697	0.344393	APOBEC3A	22	38952741	38992778	+	2358	protein_coding	apolipoprotein B mRNA editing enzyme catalytic subunit 3A [Source:HGNC Symbol;Acc:HGNC:17343]
ENSG00000276180	39.8098474592253	35.0119237747926	63.1181114982678	49.8054331965841	107.011495589925	23.9153870197973	10.2834521170781	43.0918540017097	232.938368301557	99.5571313557662	64.5387973307509	99.2484497208846	76.0240798712541	81.1453525080648	39.1974432838382	46.5059380821725	98.9499460531594	-1.1005	0.0116269295405395	0.344393	HIST1H4I	6	27138588	27139881	+	1294	protein_coding	histone cluster 1 H4 family member i [Source:HGNC Symbol;Acc:HGNC:4793]
ENSG00000213928	104.953234210685	68.3953859786646	65.1541796111151	79.2678021297746	65.8532280553387	73.5176712090064	166.591924296665	68.1129305188315	389.1129561401	254.519970596481	71.5977282888017	133.808177748693	93.7959426983005	75.8761737737749	153.774585190442	86.48079450126	167.497933490942	-0.954503	0.0116458011572672	0.344393	IRF9	14	24161053	24166565	+	3794	protein_coding	interferon regulatory factor 9 [Source:HGNC Symbol;Acc:HGNC:6131]
ENSG00000172572	976.246032011456	961.606557628606	711.266460754673	672.022605666585	548.228123560695	944.214909744588	488.463975561208	977.212043974256	10.5881076500708	138.51426971237	800.684454384628	451.04875810652	352.475279403087	278.212637170508	277.397290931778	784.907588612758	329.845828194137	1.2509	0.0116469211287308	0.344393	PDE3A	12	20369245	20684381	+	8398	protein_coding	phosphodiesterase 3A [Source:HGNC Symbol;Acc:HGNC:8778]
ENSG00000213057	3.61907704174775	0	2.71475748379646	1.40296994919955	8.23165350691734	1.77151014961461	0	0	23.8232422126592	7.79142767132083	3.02525612487895	10.6337624700948	16.7845371144327	7.37685022800589	0	2.21749601640946	9.9192965459132	-2.2417	0.0116500815108089	0.344393	C1orf220	1	178542752	178548889	+	2775	lincRNA	chromosome 1 open reading frame 220 (putative) [Source:HGNC Symbol;Acc:HGNC:33805]
ENSG00000141506	741.910793558289	1563.32310808376	504.944891986142	958.228475303293	1185.3581049961	273.698318115458	863.809977834557	721.441039577011	5632.87326983765	1663.03695073415	944.888329670524	1461.25619276552	1515.54496886201	720.823650850861	854.805782382163	851.589338681826	1827.60416358613	-1.10203	0.0116812057815848	0.344393	PIK3R5	17	8878911	8965712	-	7506	protein_coding	phosphoinositide-3-kinase regulatory subunit 5 [Source:HGNC Symbol;Acc:HGNC:30035]
ENSG00000203666	252.430623661906	292.308851980245	321.020072458932	264.459835424115	245.303274506137	208.152442579717	312.616944359173	332.224293755117	104.116391892362	133.319984598156	248.071002240074	112.540652808503	155.997462592963	264.512772461354	265.336539152135	278.564542340668	183.413543677935	0.607051	0.0116926776951165	0.344393	EFCAB2	1	244969705	245127164	+	8607	protein_coding	EF-hand calcium binding domain 2 [Source:HGNC Symbol;Acc:HGNC:28166]
ENSG00000213888	13.5715389065541	20.3557696365073	21.0393704994226	17.5371243649944	18.1096377152182	24.8011420946046	3.08503563512342	13.9005980650677	43.2347729044556	19.0457120854509	55.463028956114	26.5844061752369	40.4803542171613	26.3458936714496	16.5835336970085	16.5500271146865	32.5339573866967	-0.971612	0.0116986619272648	0.344393	LINC01521	22	31346777	31348719	+	1943	lincRNA	long intergenic non-protein coding RNA 1521 [Source:HGNC Symbol;Acc:HGNC:26029]
ENSG00000272821	323.907395236424	367.218084242592	135.737874189823	193.609852989538	172.864723645264	170.95072943781	354.779098039193	86.1837080034195	607.933847574896	702.95991879028	263.197282864468	230.398186852053	363.335862241838	348.819632209993	343.731425719812	225.656433223008	408.625165179049	-0.855854	0.0117081737398676	0.344393	U62317.2	22	50523926	50524780	+	855	antisense	novel transcript, antisense to SCO2
ENSG00000279631	5.42861556262163	17.9130772801265	1.35737874189823	2.10445492379933	0	5.31453044884384	0	0	46.7641421211459	15.5828553426417	8.06734966634386	13.2922030876185	19.7465142522738	9.48452172172186	6.03037588982126	4.01475711966118	16.9954231545095	-2.04295	0.0117106474100722	0.344393	AL158211.5	10	22252072	22254589	+	2518	TEC	TEC
ENSG00000183199	17.1906159483018	11.3992309964441	31.2197110636593	35.0742487299888	1.64633070138347	10.6290608976877	17.4818685990327	11.1204784520541	42.352430600283	22.5085688282602	36.3030734985474	43.421196752887	34.5563999414791	33.7227438994555	33.1670673940169	16.970193173569	35.1473544164185	-1.0122	0.0117286518168179	0.344393	HSP90AB3P	4	87891843	87894015	+	2173	processed_pseudogene	heat shock protein 90 alpha family class B member 3, pseudogene [Source:HGNC Symbol;Acc:HGNC:5259]
ENSG00000188257	47.0480015427208	61.067308909522	8.8229618223385	80.6707720789742	95.4871806802412	38.9732232915215	103.862866382488	15.2906578715744	1.76468460834513	12.9857127855347	8.06734966634386	8.86146872507898	18.7591885396601	66.391652052053	18.0911276694638	56.4028715724226	19.2744548637828	1.55213	0.0117336547757384	0.344393	PLA2G2A	1	19975431	19980416	-	1685	protein_coding	phospholipase A2 group IIA [Source:HGNC Symbol;Acc:HGNC:9031]
ENSG00000184489	3436.31365113949	3011.83967541762	2021.13694668647	1904.53170603839	1913.03627500759	2567.80396186638	2237.67918067619	2375.61220932006	684.697628037909	1843.10550136023	2963.74258367307	1251.23938398115	1064.33711819756	1206.64193015239	1601.06479874754	2433.49420076902	1516.40413487855	0.68253	0.0117345772997235	0.344393	PTP4A3	8	141391993	141432454	+	2877	protein_coding	protein tyrosine phosphatase type IVA, member 3 [Source:HGNC Symbol;Acc:HGNC:9636]
ENSG00000141968	513.908939928181	1011.27463554168	478.476006519127	761.111197440756	1119.50487694076	395.932518438866	811.364372037459	535.173025505105	3682.89677761628	1479.50554336526	712.952026763138	1408.08738041505	1095.9315410012	476.333757579809	794.502023483951	703.343196543992	1378.60129288924	-0.971514	0.0117349520309955	0.344393	VAV1	19	6772714	6857366	+	4305	protein_coding	vav guanine nucleotide exchange factor 1 [Source:HGNC Symbol;Acc:HGNC:12657]
ENSG00000212283	0	0	2.71475748379646	2.10445492379933	3.29266140276694	0	0	0	20.293872995969	9.52285604272546	5.04209354146491	21.2675249401895	0	4.21534298743194	0	1.01398422629534	8.62024150111155	-3.11287	0.011735077514059	0.344393	SNORD89	2	101272936	101273049	-	114	snoRNA	small nucleolar RNA, C/D box 89 [Source:HGNC Symbol;Acc:HGNC:32750]
ENSG00000271605	276.859393693703	277.65269784196	240.934726686936	237.101921414724	151.462424527279	129.320240921867	231.377672634256	278.011961301353	533.817094024401	332.434247309689	203.700579075182	256.096446154782	488.726227743776	295.074009120236	343.731425719812	227.84012987776	350.511432735411	-0.620496	0.0117363817627176	0.344393	MILR1	17	64449037	64468643	+	1816	protein_coding	mast cell immunoglobulin like receptor 1 [Source:HGNC Symbol;Acc:HGNC:27570]
ENSG00000124256	133.00108128423	152.261156881075	119.449329287044	230.087071668726	202.498676270167	66.431630610548	99.7494855356572	68.1129305188315	1124.10409551585	192.188549225914	226.894209365921	192.293871334214	193.515839672283	54.7994588366152	221.616313950931	133.948920257035	315.058905414532	-1.23449	0.0117480076265002	0.344393	ZBP1	20	57603846	57620576	-	5405	protein_coding	Z-DNA binding protein 1 [Source:HGNC Symbol;Acc:HGNC:16176]
ENSG00000137801	37785.8786236278	29186.9167356097	13047.8031564967	15218.0150389675	10070.6049003627	12631.753121827	9702.43707246315	43764.642948059	997.046803714997	3941.59668750264	22225.5483307773	12531.0029241342	8127.66526623589	8637.23778124804	6776.63490618664	21426.0064496767	9033.81895711425	1.24595	0.0117516139887259	0.344393	THBS1	15	39581079	39599466	+	9158	protein_coding	thrombospondin 1 [Source:HGNC Symbol;Acc:HGNC:11785]
ENSG00000064932	5162.61340005317	4097.2093124362	3782.33586429942	4161.91035430047	4426.98325602015	3062.05529360886	4487.69850389287	3261.08030606487	3826.71857319641	7935.13622614742	5802.44124751782	8278.38408296878	4322.51196982273	4809.70634865984	5011.24236444147	4055.2357863345	5712.30583039349	-0.494356	0.0117574606941718	0.344393	SBNO2	19	1107636	1174283	-	6626	protein_coding	strawberry notch homolog 2 [Source:HGNC Symbol;Acc:HGNC:29158]
ENSG00000169884	48.8575400635946	43.1542316293955	39.3639835150487	56.8202829425818	100.426172784392	23.9153870197973	37.020427621481	52.8222726472571	344.995840931472	49.3457085850319	21.1767928741526	83.2978060157424	69.1127998829583	144.375497319544	87.4404504024082	50.2975372779435	114.249270858759	-1.19142	0.011761885702735	0.344393	WNT10B	12	48965340	48971763	-	2629	protein_coding	Wnt family member 10B [Source:HGNC Symbol;Acc:HGNC:12775]
ENSG00000226055	0	0	1.35737874189823	7.01484974599775	0	2.65726522442192	0	0	31.7643229502123	22.5085688282602	6.05051224975789	3.54458749003159	6.91127998829583	3.16150724057395	0	1.37868671403974	10.5629683924474	-2.85237	0.011803270164046	0.344671	PAICSP1	9	37878116	37879493	+	1217	processed_pseudogene	phosphoribosylaminoimidazole carboxylase, phosphoribosylaminoimidazole succinocarboxamide synthetase pseudogene 1 [Source:HGNC Symbol;Acc:HGNC:8588]
ENSG00000261609	474.099092468955	503.194625414461	394.318524521436	366.876641715683	513.655178831642	379.103172017527	369.175931003102	380.876386982854	318.525571806295	309.925678481429	331.769755028391	430.667380038838	311.994925185926	299.289352107668	337.70104982999	422.662444119458	334.26767321122	0.336571	0.0118147779848293	0.344671	GAN	16	81314947	81390884	+	15411	protein_coding	gigaxonin [Source:HGNC Symbol;Acc:HGNC:4137]
ENSG00000224796	0	0	0	6.31336477139798	0	1.77151014961461	0	0	76.763780463013	2.59714255710694	11.0926057912228	0	2.96197713784107	8.43068597486388	0	1.01060936512657	14.5494559891497	-3.77475	0.0118289609506468	0.344671	RPL32P1	6	33079451	33079860	+	410	processed_pseudogene	ribosomal protein L32 pseudogene 1 [Source:HGNC Symbol;Acc:HGNC:10339]
ENSG00000229989	0	0	1.35737874189823	0	0	0	0	0	22.9408999084866	0	4.03367483317193	1.7722937450158	3.94930285045476	0	1.50759397245531	0.169672342737279	4.88625218708349	-4.07333	0.0118300252333735	0.344671	MIR181A1HG	1	198807493	198937429	-	3250	lincRNA	MIR181A1 host gene [Source:HGNC Symbol;Acc:HGNC:48659]
ENSG00000225492	24.4287700317973	3.25692314184117	18.3246130156261	33.6712787807892	4.9389921041504	7.08604059845845	10.2834521170781	29.1912559366421	20.293872995969	25.1057113853671	21.1767928741526	41.6489030078712	73.062102733413	24.2382221777336	79.9024805401317	16.3976657157979	40.7754408163769	-1.30089	0.0118698405367812	0.344671	GBP1P1	1	89407679	89426243	+	2352	transcribed_unprocessed_pseudogene	guanylate binding protein 1 pseudogene 1 [Source:HGNC Symbol;Acc:HGNC:39561]
ENSG00000169083	56.0956941470901	49.6680779130779	95.0165119328762	82.0737420281737	133.352786812061	102.747588677648	63.757403125884	119.545143359582	22.0585576043141	18.1799978997486	91.7661024546614	64.6887216930765	29.6197713784107	65.337816305195	18.0911276694638	87.782118499549	44.2488707149815	0.981329	0.0118880914814057	0.344671	AR	X	67544032	67730619	+	12775	protein_coding	androgen receptor [Source:HGNC Symbol;Acc:HGNC:644]
ENSG00000257464	15.3810774274279	35.8261545602529	13.5737874189823	14.0296994919955	32.9266140276694	20.372366720568	31.878701562942	29.1912559366421	1.76468460834513	14.7171411569394	22.1852115824456	15.0644968326343	1.97465142522738	4.21534298743194	9.04556383473189	24.14745714331	9.85244177539365	1.28049	0.0118886314349933	0.344671	AC125611.1	12	49442424	49442652	-	229	processed_pseudogene	Non-histone chromosomal protein HMG-14 (HMGN1) pseudogene
ENSG00000211651	120.334311638113	8.14230785460293	922.338855119848	2256.67716328748	554.813446366229	93.8900379295744	124.429770616645	34.7514951626691	380.289533098375	8.65714185702315	2.01683741658596	1.7722937450158	2.96197713784107	2.10767149371597	3.01518794491063	514.422173496895	57.2600918133525	3.16627	0.0118910832738845	0.344671	IGLV1-44	22	22380766	22381347	+	467	IG_V_gene	immunoglobulin lambda variable 1-44 [Source:HGNC Symbol;Acc:HGNC:5879]
ENSG00000187325	643.290944170663	838.657709024102	810.355108913244	777.245351856551	816.5800278862	705.061039546616	658.140935492996	836.816003517073	419.99493678614	304.731393367215	776.482405385596	365.978658345762	598.319381843896	598.578704215335	684.447663494713	760.768390050931	535.504734776951	0.507776	0.0119016708482286	0.344671	TAF9B	X	78129748	78139706	-	2791	protein_coding	TATA-box binding protein associated factor 9b [Source:HGNC Symbol;Acc:HGNC:17306]
ENSG00000277075	28.952616333982	0	10.1803405642367	12.626729542796	3.29266140276694	0	0	0	222.350260651486	6.92571348561852	16.1346993326877	46.9657842429186	9.8732571261369	12.6460289622958	7.53796986227657	6.8815434804727	46.0619590947743	-2.7309	0.011935760004065	0.34497	HIST1H2AE	6	26216975	26217483	+	509	protein_coding	histone cluster 1 H2A family member e [Source:HGNC Symbol;Acc:HGNC:4724]
ENSG00000069248	1001.57957130369	916.82386442829	931.161816942187	1014.34727327128	925.237854177509	964.587276465156	734.238481159374	935.510249779053	912.341942514431	722.871345061433	861.189576882207	752.338694759205	737.532307322426	747.169544522311	679.924881577347	927.935798440817	773.338327519908	0.262428	0.01194099261788	0.34497	NUP133	1	229440260	229508341	-	6080	protein_coding	nucleoporin 133 [Source:HGNC Symbol;Acc:HGNC:18016]
ENSG00000006459	788.95879510101	638.35693580087	467.616976583941	600.471138257408	668.410264761688	477.421985321138	610.837055754437	599.115776604416	2345.26584449067	828.488475717115	623.202761725063	895.008341232977	546.978444787984	865.199148170405	832.191872795334	606.398616023113	990.904984131365	-0.709049	0.0119623673860927	0.345169	KDM7A	7	140084746	140177035	-	9430	protein_coding	lysine demethylase 7A [Source:HGNC Symbol;Acc:HGNC:22224]
ENSG00000282995	1.80953852087388	4.88538471276176	0	2.10445492379933	0	3.54302029922922	4.11338084683122	0	10.5881076500708	5.19428511421389	12.1010244995158	6.20302810755528	3.94930285045476	15.8075362028698	1.50759397245531	2.05697241293693	7.90726834244794	-1.89586	0.0120080503000918	0.346067	FRG1EP	20	29480147	29497179	-	770	unprocessed_pseudogene	FSHD region gene 1 family member E, pseudogene [Source:HGNC Symbol;Acc:HGNC:51764]
ENSG00000235568	553.718787387406	841.100401380483	587.066305870985	721.828038863169	790.238736664065	306.471255883328	735.266826371081	478.180573438327	3842.60073467151	2786.73396377575	403.367483317193	1062.49010013697	1012.00885542903	318.258395551111	494.490822965343	626.733865732356	1417.13576512099	-1.17735	0.0120252858058603	0.346145	NFAM1	22	42380410	42432395	-	5817	protein_coding	NFAT activating protein with ITAM motif 1 [Source:HGNC Symbol;Acc:HGNC:29872]
ENSG00000215388	3.61907704174775	0	0	1.40296994919955	6.58532280553387	0	0	2.78011961301353	28.234953733522	5.19428511421389	34.2862360819614	5.31688123504739	3.94930285045476	2.10767149371597	0	1.79843617618684	11.2984757869879	-2.76056	0.0120431147258863	0.34624	ACTG1P3	20	1160584	1161697	+	1114	processed_pseudogene	actin gamma 1 pseudogene 3 [Source:HGNC Symbol;Acc:HGNC:148]
ENSG00000277440	4.52384630218469	3.25692314184117	0	0	6.58532280553387	3.54302029922922	4.11338084683122	8.34035883904059	0	0	0	0	0	0	3.01518794491063	3.7953565293326	0.430741134987233	3.49876	0.0120716721115897	0.346322	AC012676.4	16	4430522	4431103	+	582	sense_intronic	novel transcript, sense intronic with DNAJA3
ENSG00000284610	64.2386174910226	23.6126927783485	94.3378225619271	44.8950383743856	59.2679052498049	124.005710473023	83.2959621483323	79.2334089708856	0	18.1799978997486	76.6398218302667	28.3566999202527	22.7084913901149	28.4535651651656	16.5835336970085	71.6108947559662	27.2745871289367	1.39245	0.0120750725335856	0.346322	AC107918.4	8	12006188	12015193	-	3141	transcribed_unprocessed_pseudogene	RNA binding protein, fox-1 homolog (C. elegans) 1 (RBFOX1) pseudogene
ENSG00000274307	9.04769260436938	24.4269235638088	11.537719306135	9.82078964439686	3.29266140276694	7.97179567326576	0	25.0210765171218	134.998372538402	19.0457120854509	12.1010244995158	17.722937450158	33.5690742288654	42.1534298743194	6.03037588982126	11.3898323389831	37.9458466523619	-1.73767	0.0121014250807349	0.34666	AC023449.2	15	25708470	25710869	-	2400	sense_intronic	novel transcript, sense intronic to ATP10A
ENSG00000275882	13.5715389065541	20.3557696365073	8.14427245138939	15.4326694411951	174.511054346648	108.947874201299	160.421853026418	15.2906578715744	45.8817998169733	12.1199985998324	27.2273051239105	14.1783499601264	19.7465142522738	14.7537004560118	7.53796986227657	64.584461235198	20.2065197244864	1.66622	0.0121749911736123	0.347546	IKBKGP1	X	154639978	154648275	-	1073	unprocessed_pseudogene	inhibitor of nuclear factor kappa B kinase subunit gamma pseudogene 1 [Source:HGNC Symbol;Acc:HGNC:24455]
ENSG00000196235	3429.98026631643	3531.31891654129	2860.67569855052	2952.55025809045	3905.09642368159	3290.58010290914	4028.02819425948	3375.06521019843	4642.88520455603	4165.81666159954	3564.76013381569	4278.31710046813	4018.41565033772	4155.27434986103	3857.93297551315	3421.66188381842	4097.62886802161	-0.260724	0.0121870956508416	0.347546	SUPT5H	19	39436156	39476670	+	8568	protein_coding	SPT5 homolog, DSIF elongation factor subunit [Source:HGNC Symbol;Acc:HGNC:11469]
ENSG00000259775	39.8098474592253	35.8261545602529	29.183642950812	68.0440425361782	26.3412912221355	35.4302029922922	18.5102138107405	16.6807176780812	8.82342304172563	14.7171411569394	15.1262806243947	13.2922030876185	27.6451199531833	16.8613719497278	30.1518794491063	33.7282641512147	18.0882027518137	0.931765	0.0122145750342548	0.347546	AL138976.2	14	103331674	103332367	-	694	antisense	novel transcript, antisense to EIF5
ENSG00000251188	38.0003089383514	9.77076942552352	14.9311661608805	13.3282145173957	72.4385508608726	75.289181358621	44.2188441034357	13.9005980650677	2.64702691251769	8.65714185702315	4.03367483317193	8.86146872507898	28.632445665797	14.7537004560118	22.6139095868297	35.2347041787685	12.8856240052043	1.45753	0.0122150195550225	0.347546	AC079140.3	4	268982	269531	-	550	processed_pseudogene	novel zinc finger protein pseudogene
ENSG00000182575	196.334929514815	64.3242320513632	140.488699786467	159.237089234149	79.0238736664065	129.320240921867	38.0487728331888	72.2831099383518	0	29.4342823138787	70.5893095805088	72.6640435456476	45.4169827802297	45.3149371148933	36.1822553389275	109.882618493326	42.8002586677265	1.36217	0.0122209250692954	0.347546	NXPH3	17	49575858	49583827	+	5648	protein_coding	neurexophilin 3 [Source:HGNC Symbol;Acc:HGNC:8077]
ENSG00000155265	60.6195404492748	157.146541593837	172.387100221075	179.580153497543	139.938109617595	47.8307740395945	141.911639215677	127.885502198622	534.699436328573	322.911391266963	55.463028956114	212.675249401895	284.349805232743	118.029603648094	293.980824628786	128.412420104152	260.301334209024	-1.01926	0.0122216820817389	0.347546	GOLGA7B	10	97850239	97871580	+	6458	protein_coding	golgin A7 family member B [Source:HGNC Symbol;Acc:HGNC:31668]
ENSG00000143546	5957.90557997723	10104.6040475622	2382.87838140235	4394.80336586759	10885.5385975475	1249.80041055311	7308.44941960738	2547.9796253269	21816.7958129708	18242.3293211192	2938.53211596575	14056.0616917203	3435.89347989564	6289.29173724845	29743.3214825709	5603.99492848054	13788.8893773559	-1.29901	0.0122484391130835	0.347546	S100A8	1	153390032	153391188	-	1006	protein_coding	S100 calcium binding protein A8 [Source:HGNC Symbol;Acc:HGNC:10498]
ENSG00000123329	1254.0101949656	1218.0892550486	1090.65381911523	1863.8455775116	1730.29356715403	701.518019247386	1610.38860153442	904.928934035904	7911.0810992112	2741.71682611923	1344.22213815455	3547.24593064912	1291.42203209871	656.539670292524	1531.7154760146	1296.7159960766	2717.7061675057	-1.06769	0.0122559901345022	0.347546	ARHGAP9	12	57472255	57488814	-	5127	protein_coding	Rho GTPase activating protein 9 [Source:HGNC Symbol;Acc:HGNC:14130]
ENSG00000205177	22.6192315109234	9.77076942552352	8.14427245138939	1.40296994919955	4.9389921041504	6.20028552365114	30.8503563512342	6.95029903253383	0	6.0599992999162	5.04209354146491	3.54458749003159	0.98732571261369	3.16150724057395	4.52278191736594	11.3596470435757	3.33118502885233	1.78208	0.0122637615747043	0.347546	C11orf91	11	33698261	33700801	-	891	protein_coding	chromosome 11 open reading frame 91 [Source:HGNC Symbol;Acc:HGNC:34444]
ENSG00000196972	47.0480015427208	66.766924407744	49.5443240792855	70.8499824345773	72.4385508608726	66.431630610548	88.4376882068713	47.26203342123	6.17639612920794	19.0457120854509	55.463028956114	35.4458749003159	45.4169827802297	50.5841158491833	9.04556383473189	63.5973919454812	31.5968106478905	1.00486	0.0122922640757664	0.34794	SMIM10L2B	X	135094987	135098634	-	2737	protein_coding	small integral membrane protein 10 like 2B [Source:HGNC Symbol;Acc:HGNC:34500]
ENSG00000260565	103.143695689811	152.261156881075	135.737874189823	119.252445681962	111.950487694076	108.062119126491	124.429770616645	140.396040457183	472.053132732321	176.605693883272	216.810022282991	118.743680916058	160.934091156031	132.783304104106	146.236615328165	124.404198792133	203.452362914707	-0.710989	0.0123321004422084	0.348244	ERVK13-1	16	2660349	2673444	-	8966	processed_transcript	endogenous retrovirus group K13 member 1 [Source:HGNC Symbol;Acc:HGNC:27548]
ENSG00000122122	583.576172981825	958.349634486765	568.741692855359	743.574073075762	1078.34660940617	368.474111119839	497.719082466578	746.462116094133	6111.98514100335	1377.35126945238	904.551581338805	645.11492318575	1174.91759801029	237.113043043047	1002.54999168278	693.155436560804	1636.22622110234	-1.2395	0.012350212877911	0.348244	SASH3	X	129779979	129795201	+	2711	protein_coding	SAM and SH3 domain containing 3 [Source:HGNC Symbol;Acc:HGNC:15975]
ENSG00000126561	1529.96481939886	1976.13811631213	1554.87734884442	1823.15944898482	2102.36430566669	1646.61868406678	2010.41488888876	1369.20890940916	3215.25535640482	2386.77400998128	1840.36414263469	1995.60275688779	2198.77436199069	2339.51535802473	1967.41013405419	1751.59331519645	2277.6708742826	-0.379299	0.0123521589816012	0.348244	STAT5A	17	42287547	42311943	+	5754	protein_coding	signal transducer and activator of transcription 5A [Source:HGNC Symbol;Acc:HGNC:11366]
ENSG00000276775	30.7621548548559	0	44.7934984826416	62.43216273938	6.58532280553387	1.77151014961461	0	5.56023922602706	7.05873843338051	2.59714255710694	6.05051224975789	0	0.98732571261369	0	0	18.9881110322566	2.38481699326558	2.97971	0.0123627379996021	0.348244	IGHV4-4	14	106011922	106012420	-	417	IG_V_gene	immunoglobulin heavy variable 4-4 [Source:HGNC Symbol;Acc:HGNC:5652]
ENSG00000109189	391.765089769194	262.182312918214	325.092208684626	338.817242731692	273.290896429656	290.527664536796	210.8107684001	259.941183816765	405.877459919379	348.882816838033	319.668730528875	394.335358266015	348.525976552632	389.919226337454	503.536386800075	294.053420910881	387.249422177495	-0.392752	0.0123893935903751	0.348244	USP46	4	52590972	52659335	-	8917	protein_coding	ubiquitin specific peptidase 46 [Source:HGNC Symbol;Acc:HGNC:20075]
ENSG00000142892	795.292179924068	800.388862107468	1223.67693582126	947.004715709697	1124.44386904491	1124.90894500528	733.210135947666	874.347618292755	684.697628037909	569.639934192123	950.938841920282	835.636500774948	674.34346171515	714.500636369714	562.332551725832	952.909157731637	713.155650676565	0.41756	0.0123907847160717	0.348244	PIGK	1	77088990	77219430	-	5513	protein_coding	phosphatidylinositol glycan anchor biosynthesis class K [Source:HGNC Symbol;Acc:HGNC:8965]
ENSG00000263503	0.904769260436938	1178.19194656104	4.07213622569469	7.01484974599775	6.58532280553387	16.8293464213388	2.05669042341561	9.73041864554736	0.882342304172563	6.92571348561852	155.296481077119	25.698259302729	1.97465142522738	17.9152076965857	1100.54359989238	153.173185011126	187.033750740547	-2.11794	0.0124320672003063	0.348992	MAPK8IP1P2	17	45600869	45602340	-	1472	processed_pseudogene	mitogen-activated protein kinase 8 interacting protein 1 pseudogene 2 [Source:HGNC Symbol;Acc:HGNC:52402]
ENSG00000006740	238.859084755352	241.826543281707	549.059701097835	348.638032376088	311.156502561476	279.012848564301	363.005859732856	369.7559085308	16.7645037792787	204.308547825746	405.384320733779	129.377443386153	155.997462592963	132.783304104106	82.9176684850423	337.664310112552	161.07617870101	1.06747	0.0125025360283091	0.349552	ARHGAP44	17	12789539	12991643	+	9281	protein_coding	Rho GTPase activating protein 44 [Source:HGNC Symbol;Acc:HGNC:29096]
ENSG00000268756	1.80953852087388	11.3992309964441	9.50165119328762	3.50742487299888	41.1582675345867	3.54302029922922	34.9637371980654	8.34035883904059	3.52936921669025	0	7.05893095805088	8.86146872507898	0.98732571261369	2.10767149371597	0	14.2779036818158	3.22068087230711	2.10621	0.0125047974640569	0.349552	AC104534.1	19	38820166	38823223	+	566	antisense	novel transcript, antisense to ECH1
ENSG00000139197	1017.86541799155	1081.29848309127	837.502683751209	806.707720789742	925.237854177509	969.016051839193	1004.69327183853	689.469664027356	693.521051079635	697.765633676066	772.448730552424	797.532185257108	679.280090278218	794.59215313092	808.070369236049	916.473893438295	749.030030458631	0.292263	0.0125090891099896	0.349552	PEX5	12	7188685	7218574	+	5488	protein_coding	peroxisomal biogenesis factor 5 [Source:HGNC Symbol;Acc:HGNC:9719]
ENSG00000214176	674.957868285955	620.443858520743	447.934984826416	556.979069832222	574.56941478283	554.482676829374	468.92541653876	417.01794195203	2323.20728688636	750.574199003907	880.349532339774	794.873744639584	500.574136295141	504.787322744975	651.280596100696	539.413903946041	915.092402572919	-0.762818	0.0125306126946843	0.349552	PLEKHM1P1	17	64779259	64837154	-	8469	transcribed_unprocessed_pseudogene	pleckstrin homology and RUN domain containing M1 pseudogene 1 [Source:HGNC Symbol;Acc:HGNC:35411]
ENSG00000168904	432.479706488856	915.19540285737	522.590815630819	498.75581694044	528.472155144093	565.997492801869	571.75993770954	497.641410729422	296.467014201981	456.23137586512	468.914699356237	460.796373704107	403.816216458999	383.596211856306	453.78578570905	566.611592287801	417.658239593114	0.441164	0.0125464013308369	0.349552	LRRC28	15	99251362	99390729	+	9279	protein_coding	leucine rich repeat containing 28 [Source:HGNC Symbol;Acc:HGNC:28355]
ENSG00000196189	456.908476520653	482.024624992494	230.754386122699	545.053825264025	656.885949852004	245.354155721624	419.564846376785	300.252918205461	2081.44549554308	1099.45701584194	468.914699356237	708.03135113381	518.345999122187	336.173603247697	423.633906259943	417.099897881968	805.14315292927	-0.949873	0.0125588047575545	0.349552	SEMA4A	1	156147366	156177752	+	6822	protein_coding	semaphorin 4A [Source:HGNC Symbol;Acc:HGNC:10729]
ENSG00000186260	1098.38988217044	1198.54771619755	1489.04447986236	1774.05550076283	1079.99294010756	2279.0478074792	1571.31148348953	1042.54485488007	254.114583601698	617.25421440575	1551.9563920629	661.065566890892	718.773118782766	877.845177132701	1189.49164426724	1441.61683311869	838.64295673485	0.782322	0.0125680459476627	0.349552	MRTFB	16	14071321	14266773	+	16578	protein_coding	myocardin related transcription factor B [Source:HGNC Symbol;Acc:HGNC:29819]
ENSG00000025708	6957.67561276005	7341.91899249546	4907.60284133306	5134.87001407036	7047.94173262263	2935.39231791141	6683.21553088903	5038.96679858702	7997.55064502011	11660.3043672245	5378.90539003477	8201.28930506059	12130.2837051718	8330.57157891237	6357.52378184406	5755.94798008363	8579.4898247526	-0.575937	0.0125732971270297	0.349552	TYMP	22	50525752	50530056	-	3320	protein_coding	thymidine phosphorylase [Source:HGNC Symbol;Acc:HGNC:3148]
ENSG00000127951	449.670322437158	495.052317559858	423.502167472248	775.842381907352	1149.13882956566	424.2766808327	1061.25225848246	550.463683376679	7904.904703082	1398.12840990924	810.768641467558	372.181686453317	1045.5779296579	299.289352107668	682.940069522258	666.149830204264	1787.6843988857	-1.42458	0.0125841817842756	0.349552	FGL2	7	77193371	77199848	-	4604	protein_coding	fibrinogen like 2 [Source:HGNC Symbol;Acc:HGNC:3696]
ENSG00000148175	8101.30395795234	9984.09789131412	8467.32859196117	8308.38803915974	5307.7701812603	8889.43793076612	6572.15424802459	8325.06818116902	3081.13932617059	5711.11648307817	9903.68013414538	4811.77751771788	5407.58292798518	4297.54217568686	4577.05530037434	7994.44362770092	5398.5562664512	0.566485	0.0125996179445936	0.349573	STOM	9	121338988	121370304	-	3198	protein_coding	stomatin [Source:HGNC Symbol;Acc:HGNC:3383]
ENSG00000236780	12.6667696461171	3.25692314184117	1.35737874189823	0	0	7.97179567326576	0	5.56023922602706	0	0	0	0	0	0	0	3.85163830364367	0	4.37691	0.0126585310774984	0.350725	LINC01829	2	67123357	67215319	-	2788	lincRNA	long intergenic non-protein coding RNA 1829 [Source:HGNC Symbol;Acc:HGNC:52635]
ENSG00000145936	568.195095554397	530.064241334651	727.555005657452	509.278091559437	480.728564803973	345.444479174849	402.082977777752	1081.46652946226	151.762876317681	384.377098451828	661.522672640196	365.978658345762	284.349805232743	235.005371549331	304.533982435974	580.601873165597	341.075780710502	0.76695	0.0126732039275558	0.350725	KCNMB1	5	170374671	170389677	-	6079	protein_coding	potassium calcium-activated channel subfamily M regulatory beta subunit 1 [Source:HGNC Symbol;Acc:HGNC:6285]
ENSG00000254838	95.0007723458784	121.320387033584	160.170691543991	250.43013593212	179.450046450798	60.2313450868968	178.932066837158	140.396040457183	2087.62189167229	90.0342753130407	342.862360819614	105.45147782844	104.656525537051	61.1224733177631	272.874509014412	148.241435710951	437.803359071801	-1.5627	0.012698665688626	0.350725	GVINP1	11	6713536	6746439	-	8438	transcribed_unprocessed_pseudogene	GTPase, very large interferon inducible pseudogene 1 [Source:HGNC Symbol;Acc:HGNC:25813]
ENSG00000217512	0	0	0	0	0	0	0	0	9.7057653458982	5.19428511421389	2.01683741658596	3.54458749003159	0	2.10767149371597	0	0	3.22416383720652	-4.20031	0.012703451070645	1	AL356776.1	6	79067692	79068138	-	447	processed_pseudogene	nucleoporin 155kDa pseudogene
ENSG00000135114	83.2387719601982	42.3400008439353	98.4099587876218	80.6707720789742	302.924849054558	38.9732232915215	218.009184882055	73.6731697448586	238.232422126592	281.357110353252	109.917639203935	140.011205856248	530.193907673551	96.9528887109346	502.02879282762	117.279991330465	271.241995250305	-1.21338	0.0127265804306478	0.350725	OASL	12	121019111	121039242	-	3517	protein_coding	2'-5'-oligoadenylate synthetase like [Source:HGNC Symbol;Acc:HGNC:8090]
ENSG00000026751	265.097393308023	703.495398637693	661.043447304439	1150.43535834363	954.871806802412	255.097461544504	953.276011253136	366.975788917786	2367.32440209499	1768.65408138983	732.111982220705	1833.43787921884	2183.96447630148	438.395670692922	476.399695295879	663.786583263953	1400.04116960209	-1.07693	0.0127266817406313	0.350725	SLAMF7	1	160739057	160754821	+	4833	protein_coding	SLAM family member 7 [Source:HGNC Symbol;Acc:HGNC:21394]
ENSG00000152804	1310.10588911269	1735.94003460135	813.74855576799	892.288887690914	1336.82052952338	1516.41268807011	1135.29311372542	764.532893578721	1028.81112666521	641.494211605415	1074.97434304032	309.265258505256	827.378947170272	403.619091046608	808.070369236049	1188.14282400882	727.659049609876	0.707515	0.0127295135660652	0.350725	HHEX	10	92689951	92695646	+	2525	protein_coding	hematopoietically expressed homeobox [Source:HGNC Symbol;Acc:HGNC:4901]
ENSG00000106113	6.33338482305856	48.0396163421573	5.42951496759293	5.6118797967982	0	57.5740798624749	51.4172605853903	0	1.76468460834513	3.46285674280926	10.0841870829298	1.7722937450158	3.94930285045476	8.43068597486388	0	21.800717047184	4.20914442920266	2.37037	0.0127986902598206	0.351385	CRHR2	7	30651943	30700129	-	3984	protein_coding	corticotropin releasing hormone receptor 2 [Source:HGNC Symbol;Acc:HGNC:2358]
ENSG00000111537	1.80953852087388	6.51384628368235	5.42951496759293	11.9252445681962	3.29266140276694	7.08604059845845	0	0	54.7052228586989	12.1199985998324	44.3704231648912	1.7722937450158	15.797211401819	4.21534298743194	3.01518794491063	4.50710579269634	19.4279543860857	-2.07696	0.012800995853026	0.351385	IFNG	12	68154768	68159747	-	1218	protein_coding	interferon gamma [Source:HGNC Symbol;Acc:HGNC:5438]
ENSG00000139190	180.049082826951	263.810774489135	181.888751414363	260.952410551116	120.182141200993	270.155297816228	238.576089116211	157.076758135264	1335.86624851726	703.825632975982	254.121514489832	210.90295565688	218.198982487625	224.467014080751	144.72902135571	209.086413193783	441.730195652006	-1.07874	0.0128087754710559	0.351385	VAMP1	12	6462237	6470987	-	3580	protein_coding	vesicle associated membrane protein 1 [Source:HGNC Symbol;Acc:HGNC:12642]
ENSG00000151726	1994.11145000301	2428.85043302805	1429.31981521884	2191.4390606497	2849.79844409478	918.528012575176	1551.77292446708	1548.52662444854	1731.15560078657	5647.9193475219	1799.01897559468	7899.1132215354	2739.82885250299	2067.62573533537	2262.89855265543	1864.04334556065	3449.6514694189	-0.888235	0.012821245089532	0.351385	ACSL1	4	184755595	184826818	-	6284	protein_coding	acyl-CoA synthetase long chain family member 1 [Source:HGNC Symbol;Acc:HGNC:3569]
ENSG00000234338	0	0	3.39344685474558	4.20890984759865	19.7559684166016	3.54302029922922	0	2.78011961301353	37.9407190794202	0	0	0	0	0	0	4.21018312889858	5.42010272563146	4.06155	0.0128272850678524	0.351385	AC073349.2	7	64835280	64836882	-	1603	processed_pseudogene	endogenous retroviral family W, env(C7), member 2 (ERVWE2) pseudogene
ENSG00000188848	0	0	6.78689370949116	5.6118797967982	0	3.54302029922922	0	0	60.8816189879069	13.851426971237	6.05051224975789	12.4060562151106	1.97465142522738	10.5383574685798	0	1.99272422568982	15.1003747596885	-2.8567	0.0128723600248652	0.351993	BEND4	4	42110938	42152878	-	8765	protein_coding	BEN domain containing 4 [Source:HGNC Symbol;Acc:HGNC:23815]
ENSG00000254166	12.6667696461171	14.6561541382853	1.35737874189823	5.6118797967982	27.987621923519	12.4005710473023	10.2834521170781	5.56023922602706	3.52936921669025	2.59714255710694	8.06734966634386	0	0.98732571261369	6.32301448114791	0	11.3155083296282	3.07202880484324	1.84621	0.0129046082603126	0.351993	CASC19	8	127072694	127227541	-	22208	processed_transcript	cancer susceptibility 19 [Source:HGNC Symbol;Acc:HGNC:49476]
ENSG00000187837	171.001390222581	154.703849237456	264.010165299206	282.698444763709	210.730329777084	119.576935098986	93.5794142654103	86.1837080034195	430.583044436211	341.957103352414	192.60797328396	653.090245038321	228.072239613762	253.974414992774	134.175863548523	172.810529583482	319.208697752281	-0.884957	0.0129077650188206	0.351993	HIST1H1C	6	26055787	26056428	-	642	protein_coding	histone cluster 1 H1 family member c [Source:HGNC Symbol;Acc:HGNC:4716]
ENSG00000119616	1108.34234403525	1236.81656311419	1366.20170372057	1058.54082667106	1086.57826291309	1225.88502353331	1067.4223297527	1131.50868249651	979.399957631545	734.125629475563	994.30084637688	990.71220346383	1086.05828387506	1041.18971789569	907.571571418099	1160.16196702958	961.908315733809	0.271085	0.0129126483244587	0.351993	FCF1	14	74713144	74738620	+	4747	protein_coding	FCF1, rRNA-processing protein [Source:HGNC Symbol;Acc:HGNC:20220]
ENSG00000237289	0.904769260436938	1.62846157092059	0	2.8059398983991	0	0	3.08503563512342	0	0	0.865714185702315	5.04209354146491	0	0	22.1305506840177	66.3341347880338	1.05302579561001	13.4817847427455	-3.62816	0.0129351543260242	0.351993	CKMT1B	15	43593054	43604901	+	3470	protein_coding	creatine kinase, mitochondrial 1B [Source:HGNC Symbol;Acc:HGNC:1995]
ENSG00000203865	9.95246186480631	6.51384628368235	12.8950980480332	8.4178196951973	3.29266140276694	7.08604059845845	0	8.34035883904059	35.2936921669025	25.1057113853671	12.1010244995158	5.31688123504739	31.5944228036381	10.5383574685798	10.5531578071872	7.06228584149814	18.6433210523197	-1.38092	0.0129399776440611	0.351993	ATP1A1-AS1	1	116392247	116418622	-	2458	processed_transcript	ATP1A1 antisense RNA 1 [Source:HGNC Symbol;Acc:HGNC:28262]
ENSG00000100439	551.909248866532	643.242320513632	598.60402517712	599.769653282808	846.213980511103	1105.42233335952	787.712432168179	585.215178539348	652.050962783524	608.597072548727	456.813674856721	403.196826991093	599.30670755651	462.633892870655	411.573154480301	714.76114655228	513.453184583933	0.475881	0.0129576154310013	0.351993	ABHD4	14	22598237	22613215	+	4070	protein_coding	abhydrolase domain containing 4 [Source:HGNC Symbol;Acc:HGNC:20154]
ENSG00000229598	2.71430778131081	0	1.35737874189823	0	0	0	0	1.39005980650677	23.8232422126592	6.0599992999162	7.05893095805088	0	1.97465142522738	0	7.53796986227657	0.682718291214476	6.63639910830432	-3.25573	0.0129677810819469	0.351993	PRDX3P1	22	38722743	38723505	-	763	processed_pseudogene	peroxiredoxin 3 pseudogene 1 [Source:HGNC Symbol;Acc:HGNC:39264]
ENSG00000280425	0	6.51384628368235	1.35737874189823	1.40296994919955	6.58532280553387	1.77151014961461	4.11338084683122	0	0	0	0	0	0	0	0	2.71805109709498	0	3.8578	0.0129939741417504	1	AL357673.2	1	54137746	54142980	+	4969	antisense	novel transcript, antisense to CDCP2
ENSG00000215835	9.95246186480631	12.2134617819044	14.9311661608805	7.01484974599775	14.8169763124512	6.20028552365114	4.11338084683122	20.8508970976015	24.7055845168318	9.52285604272546	29.2441425404965	18.6090843226659	14.8098856892053	24.2382221777336	34.6746613664722	11.2616849167655	22.2577766651615	-0.996899	0.0130070901624315	0.352362	AL596087.1	1	166275629	166277597	-	1969	processed_pseudogene	Ewing sarcoma breakpoint region 1 (EWSR1) pseudogene
ENSG00000213782	24.4287700317973	11.3992309964441	16.2885449027788	30.8653388823901	11.5243149096843	15.0578362717242	22.6235946575717	45.8719736147233	207.350441480552	19.0457120854509	52.4377728312351	50.5103717329502	9.8732571261369	38.9919226337454	24.121503559285	22.2574505333892	57.4758544927651	-1.37482	0.0130666342220371	0.352362	DDX47	12	12813316	12829981	+	5040	protein_coding	DEAD-box helicase 47 [Source:HGNC Symbol;Acc:HGNC:18682]
ENSG00000211455	2387.68607829308	2805.02505591071	1003.78157963374	1412.79073884395	1415.84440318978	1077.96392604049	904.943786302869	4487.11305540384	895.577438735152	623.314213705667	1131.44579070473	1166.16928422039	1207.49934652654	1147.62712832835	1402.06239438344	1936.89357795231	1081.95651380061	0.840076	0.0130694269418101	0.352362	STK38L	12	27243968	27325959	+	6921	protein_coding	serine/threonine kinase 38 like [Source:HGNC Symbol;Acc:HGNC:17848]
ENSG00000223573	3.61907704174775	9.77076942552352	2.71475748379646	2.8059398983991	0	0	0	13.9005980650677	20.293872995969	0	9.07576837463684	8.86146872507898	3.94930285045476	12.6460289622958	120.607517796425	4.10139273931681	25.0619942435515	-2.6091	0.0130899078969291	0.352362	TINCR	19	5558167	5578349	-	4429	protein_coding	TINCR ubiquitin domain containing [Source:HGNC Symbol;Acc:HGNC:14607]
ENSG00000162783	1234.10527123598	1573.90810829475	1808.02848420844	1641.47484056347	1425.72238739808	1192.22633069063	1612.44529195784	1670.85188742113	4094.95063366487	2099.35690032811	1880.70089096641	2217.13947501476	1585.64509445759	1697.72938818821	1708.10397079187	1519.84532522129	2183.37519334455	-0.522824	0.0130902306810055	0.352362	IER5	1	181088712	181092899	+	4188	protein_coding	immediate early response 5 [Source:HGNC Symbol;Acc:HGNC:5393]
ENSG00000162723	65.1433867514595	438.870393363098	26.4688854670155	126.26729542796	92.1945192774742	10.6290608976877	139.854948792262	43.0918540017097	0	89.1685611273384	30.2525612487895	46.9657842429186	32.5817485162518	18.9690434434437	6.03037588982126	117.815042997333	31.9954392097947	1.87761	0.0130928410624352	0.352362	SLAMF9	1	159951492	159954254	-	1156	protein_coding	SLAM family member 9 [Source:HGNC Symbol;Acc:HGNC:18430]
ENSG00000278330	26.2383085526712	4.88538471276176	20.3606811284735	32.2683088315897	52.682582444271	8.85755074807306	46.2755345268513	48.6520932277368	151.762876317681	58.0028504420551	24.2020489990316	125.832855896121	92.8086169856868	23.1843864308757	36.1822553389275	30.0275555215535	73.1394129157684	-1.29989	0.0130978821096344	0.352362	AC018529.2	18	77112602	77115726	+	3125	antisense	novel transcript, antisense to MBP
ENSG00000100911	2473.63915803459	2422.33658674437	2433.78008422353	2143.73808237691	2448.09375295722	2025.72185608431	2153.35487331615	2787.06991204606	3157.9031066336	3629.93958064981	2494.82788431684	2381.96279330123	3336.17358292166	2467.02948339454	3107.1511772304	2360.96678822289	2939.28394406401	-0.316393	0.0130997897061683	0.352362	PSME2	14	24143362	24147570	-	3582	protein_coding	proteasome activator subunit 2 [Source:HGNC Symbol;Acc:HGNC:9569]
ENSG00000187048	2.71430778131081	0	10.1803405642367	11.2237595935964	0	18.6008565709534	0	0	0	0	1.00841870829298	0	0	0	0	5.33990806376217	0.144059815470426	4.44519	0.0131294546275861	0.352761	CYP4A11	1	46929177	46941484	-	3890	protein_coding	cytochrome P450 family 4 subfamily A member 11 [Source:HGNC Symbol;Acc:HGNC:2642]
ENSG00000220494	0	0	0	0	0	0	0	0	1.76468460834513	0	0	5.31688123504739	1.97465142522738	3.16150724057395	12.0607517796425	0	3.46835375554805	-4.27545	0.0131573440842328	1	YAP1P1	6	147406889	147408281	+	1393	processed_pseudogene	Yes associated protein 1 pseudogene 1 [Source:HGNC Symbol;Acc:HGNC:38016]
ENSG00000175857	74.1910793558289	96.0792326843146	33.2557791765067	77.1633472059753	179.450046450798	40.7447334411361	100.777830747365	36.1415549691759	769.402489238475	155.828553426417	77.6482405385596	89.5008341232977	100.707222686596	43.2072656211774	183.926464639548	79.7254505038876	202.888724324867	-1.35164	0.0131581325360786	0.352863	GAPT	5	58491435	58497090	+	3273	protein_coding	GRB2 binding adaptor protein, transmembrane [Source:HGNC Symbol;Acc:HGNC:26588]
ENSG00000100100	579.957095940077	825.630016456737	537.5219817917	665.007755920587	533.411147248244	633.314878487224	545.022962205137	511.54200879449	5424.64048605292	483.934229807594	471.939955481116	411.172148843665	514.396696271732	319.312231297969	514.089544607262	603.925980855524	1162.78361319461	0.379281	0.0131628770478445	0.352863	PIK3IP1	22	31281593	31292534	-	3805	protein_coding	phosphoinositide-3-kinase interacting protein 1 [Source:HGNC Symbol;Acc:HGNC:24942]
ENSG00000067596	1092.96126660782	998.24694297432	1114.40794709845	1063.45122149326	811.64103578205	1054.9342940955	962.531118158507	1038.37467546055	1548.51074382285	1354.84270062412	1116.31951008033	1226.42727155093	1110.7414266904	1239.31083830499	1062.853750581	1017.06856270881	1237.00089166495	-0.281913	0.0131884532127264	0.353151	DHX8	17	43483865	43610338	+	10439	protein_coding	DEAH-box helicase 8 [Source:HGNC Symbol;Acc:HGNC:2749]
ENSG00000204070	619.766943399302	531.692702905572	665.794272901083	662.201816022188	503.777194623341	567.769002951483	566.618211651001	717.270860157491	882.342304172563	907.268466616026	466.897861939651	981.850734738751	954.743964097438	750.331051762885	691.985633356989	604.361375576433	805.060002383472	-0.413954	0.0132630733188677	0.35475	SYS1	20	45361937	45376798	+	6117	protein_coding	SYS1, golgi trafficking protein [Source:HGNC Symbol;Acc:HGNC:16162]
ENSG00000179674	0	0	1.35737874189823	0	0	0	0	0	0	0	0	8.86146872507898	1.97465142522738	4.21534298743194	30.1518794491063	0.169672342737279	6.45762036954923	-4.45556	0.0132917127713193	0.354954	ARL14	3	160677159	160678452	+	1294	protein_coding	ADP ribosylation factor like GTPase 14 [Source:HGNC Symbol;Acc:HGNC:22974]
ENSG00000136206	5.42861556262163	3.25692314184117	0	2.10445492379933	6.58532280553387	6.20028552365114	0	2.78011961301353	32.6466652543848	2.59714255710694	7.05893095805088	20.3813780676816	1.97465142522738	12.6460289622958	7.53796986227657	3.29446519630758	12.1203952981463	-1.92161	0.0133085063680711	0.354954	SPDYE1	7	44000889	44010122	+	2649	protein_coding	speedy/RINGO cell cycle regulator family member E1 [Source:HGNC Symbol;Acc:HGNC:16408]
ENSG00000240747	16.2858466878649	10.5850002109838	11.537719306135	13.3282145173957	6.58532280553387	11.514815972495	20.5669042341561	11.1204784520541	0	6.0599992999162	7.05893095805088	2.65844061752369	10.8605828387506	6.32301448114791	6.03037588982126	12.6905377733273	5.57019201217293	1.21425	0.0133180483268631	0.354954	KRBOX1	3	42809483	42942792	+	2943	protein_coding	KRAB box domain containing 1 [Source:HGNC Symbol;Acc:HGNC:38708]
ENSG00000083750	431.574937228419	460.040393785066	318.305314975135	380.204856233078	337.497793783611	605.856471168197	457.613619209974	358.635430078745	350.289894756508	268.371397567718	337.820267278149	291.542321055098	367.285165092293	285.589487398514	330.163079967714	418.716102057778	318.723087587999	0.395419	0.0133303378285117	0.354954	RRAGB	X	55717739	55758774	+	2725	protein_coding	Ras related GTP binding B [Source:HGNC Symbol;Acc:HGNC:19901]
ENSG00000242114	7.2381540834955	14.6561541382853	8.8229618223385	9.82078964439686	4.9389921041504	12.4005710473023	0	5.56023922602706	71.4697266379776	10.3885702284278	19.1599554575667	21.2675249401895	20.7338399648875	15.8075362028698	3.01518794491063	7.92973275824949	23.1203344824042	-1.53112	0.01335676436683	0.355092	MTFP1	22	30425530	30429053	+	1696	protein_coding	mitochondrial fission process 1 [Source:HGNC Symbol;Acc:HGNC:26945]
ENSG00000178761	132.096312023793	107.478463680759	144.560836012162	171.863818776945	169.572062242497	142.606567043976	141.911639215677	154.296638522251	340.584129410609	139.379983898073	199.66690424201	203.813780676816	203.38909679842	170.721390990994	170.358118887451	145.548292189757	203.987629272053	-0.491057	0.0133769041920668	0.355092	FAM219B	15	74899987	74907121	-	5258	protein_coding	family with sequence similarity 219 member B [Source:HGNC Symbol;Acc:HGNC:24695]
ENSG00000134107	4085.93798013321	3484.09353098459	3111.7907658017	3182.63732975918	2176.44918722894	1667.87680586216	2226.3673833474	2493.76729287314	3044.08094939534	3893.98240728901	5996.05763951007	5909.71349275517	3458.60197128576	4312.29587614287	2752.8665937034	2803.61503449879	4195.37127572595	-0.581394	0.0133802594197125	0.355092	BHLHE40	3	4979116	4985323	+	3837	protein_coding	basic helix-loop-helix family member e40 [Source:HGNC Symbol;Acc:HGNC:1046]
ENSG00000111696	181.858621347824	134.348079600948	153.3837978345	88.3871067995717	136.645448214828	149.692607642435	110.032937652735	159.856877748278	161.468641663579	198.24854852583	170.422761701514	141.783499601264	215.237005349784	277.15880142365	199.002404364102	139.27568460514	194.760237518532	-0.484091	0.0134342896668586	0.356128	NT5DC3	12	103770453	103841197	-	8722	protein_coding	5'-nucleotidase domain containing 3 [Source:HGNC Symbol;Acc:HGNC:30826]
ENSG00000123843	20.8096929900496	9.77076942552352	0	2.8059398983991	32.9266140276694	5.31453044884384	32.9070467746498	2.78011961301353	3.52936921669025	2.59714255710694	8.06734966634386	1.7722937450158	0	2.10767149371597	3.01518794491063	13.4143391472686	3.01271637482621	2.14291	0.0134789230213637	0.356914	C4BPB	1	207088842	207099993	+	3219	protein_coding	complement component 4 binding protein beta [Source:HGNC Symbol;Acc:HGNC:1328]
ENSG00000185862	519.337555490802	894.839633220862	1054.68328245493	896.497797538513	1223.22371112792	301.156725434484	875.121775163343	754.802474933174	6278.74783649196	1788.56550766098	611.101737225547	1437.33022720781	1266.73888928336	465.795400111229	912.094353335465	814.957869420503	1822.91056447377	-1.16175	0.0134958239240075	0.356965	EVI2B	17	31303766	31314112	-	2072	protein_coding	ecotropic viral integration site 2B [Source:HGNC Symbol;Acc:HGNC:3500]
ENSG00000226762	0	0	4.75082559664381	7.71633472059753	0	25.6868971694119	37.020427621481	0	1.76468460834513	0	0	1.7722937450158	0	0	0	9.39681063851678	0.505282621908703	4.11577	0.0135648554142312	0.357812	AL451164.1	10	3232388	3257932	-	2361	lincRNA	uncharacterized LOC105376354 [Source:NCBI gene;Acc:105376354]
ENSG00000106565	1345.39189026973	916.00963364283	1529.08715274836	1847.00993812121	1131.02919185044	2253.36091030979	1923.0055458936	1403.96040457183	915.871311731121	1302.89984948198	856.147483340742	657.52097940086	1026.81874111824	1607.09951395843	880.434879913904	1543.60683342597	1035.25610842075	0.576527	0.0135764817551901	0.357812	TMEM176B	7	150791285	150801360	-	1979	protein_coding	transmembrane protein 176B [Source:HGNC Symbol;Acc:HGNC:29596]
ENSG00000176531	170.096620962144	132.719618030028	167.636274624432	200.624702735536	131.706456110677	176.265259886654	221.094220517178	136.225861037663	318.525571806295	283.954252910359	177.481692659565	239.259655577132	154.022811167736	228.682357068183	227.646689840752	167.046126738039	232.796147290003	-0.476452	0.0136003923732972	0.357812	PHLDB3	19	43474954	43504935	-	4553	protein_coding	pleckstrin homology like domain family B member 3 [Source:HGNC Symbol;Acc:HGNC:30499]
ENSG00000240864	9.95246186480631	4.07115392730147	23.0754386122699	9.11930466979708	14.8169763124512	2.65726522442192	4.11338084683122	9.73041864554736	211.762153001415	0	233.953140323972	3.54458749003159	10.8605828387506	0	0	9.69205001292831	65.7314948077385	-2.76309	0.0136092256602474	0.357812	IGKV1-16	2	89099859	89100361	-	378	IG_V_gene	immunoglobulin kappa variable 1-16 [Source:HGNC Symbol;Acc:HGNC:5732]
ENSG00000139908	15.3810774274279	8.14230785460293	15.6098555318297	11.9252445681962	26.3412912221355	29.2299174686411	10.2834521170781	2.78011961301353	119.998553367469	31.1657106852833	31.2609799570824	29.2428467927606	11.8479085513643	8.43068597486388	36.1822553389275	14.9616582253656	38.3041343811072	-1.36243	0.0136133840883121	0.357812	TSSK4	14	24205697	24208362	+	1924	protein_coding	testis specific serine kinase 4 [Source:HGNC Symbol;Acc:HGNC:19825]
ENSG00000244513	13.5715389065541	27.68384670565	23.0754386122699	17.5371243649944	14.8169763124512	36.3159580670996	26.736975504403	11.1204784520541	29.1172960376946	41.5542809137111	60.5051224975789	62.9164279480607	24.6831428153422	22.1305506840177	31.6594734215616	21.3572921156845	38.9380420454238	-0.855189	0.0136180373225608	0.357812	AC109587.1	3	69013941	69056622	+	3746	antisense	novel transcript
ENSG00000100299	1227.77188641292	1176.56348499012	1479.54282866907	1409.28331397095	1481.69763124512	1156.79612769834	1443.79667723776	1271.90472295369	1889.09487323346	2479.40542785143	1193.96775061889	1962.81532260499	1870.98222540294	2010.71860500503	1138.23344920376	1330.91958414725	1792.17395056007	-0.429935	0.0136580380144815	0.358467	ARSA	22	50622754	50628173	-	2932	protein_coding	arylsulfatase A [Source:HGNC Symbol;Acc:HGNC:713]
[truncated: 1,390 more rows]

## Sheet: MSCvsCNTR_D7
gene_id	MSCA3P	MSCB3P	MSCC3P	MSCD3P	MSCE3F	MSCF3F	MSCG3F	CNTRP3P	CNTRI3F	CNTRK3P	CNTRL3P	CNTRM3F	CNTRN3F	MSC_D7	CNTR_D7	log2FoldChange	pvalue	padj	gene_name	gene_chr	gene_start	gene_end	gene_strand	gene_length	gene_biotype	gene_description
[truncated: 2,376 more rows]

[truncated: 4 more sheets: CNTRvsCNTR_D1, CNTRvsCNTR1_D7, MSCvsMSC_D1, MSCvsMSC_D7]
