# Supplementary material
Source: Research Square preprint supplement (doi:10.21203/rs.3.rs-8701993/v1)

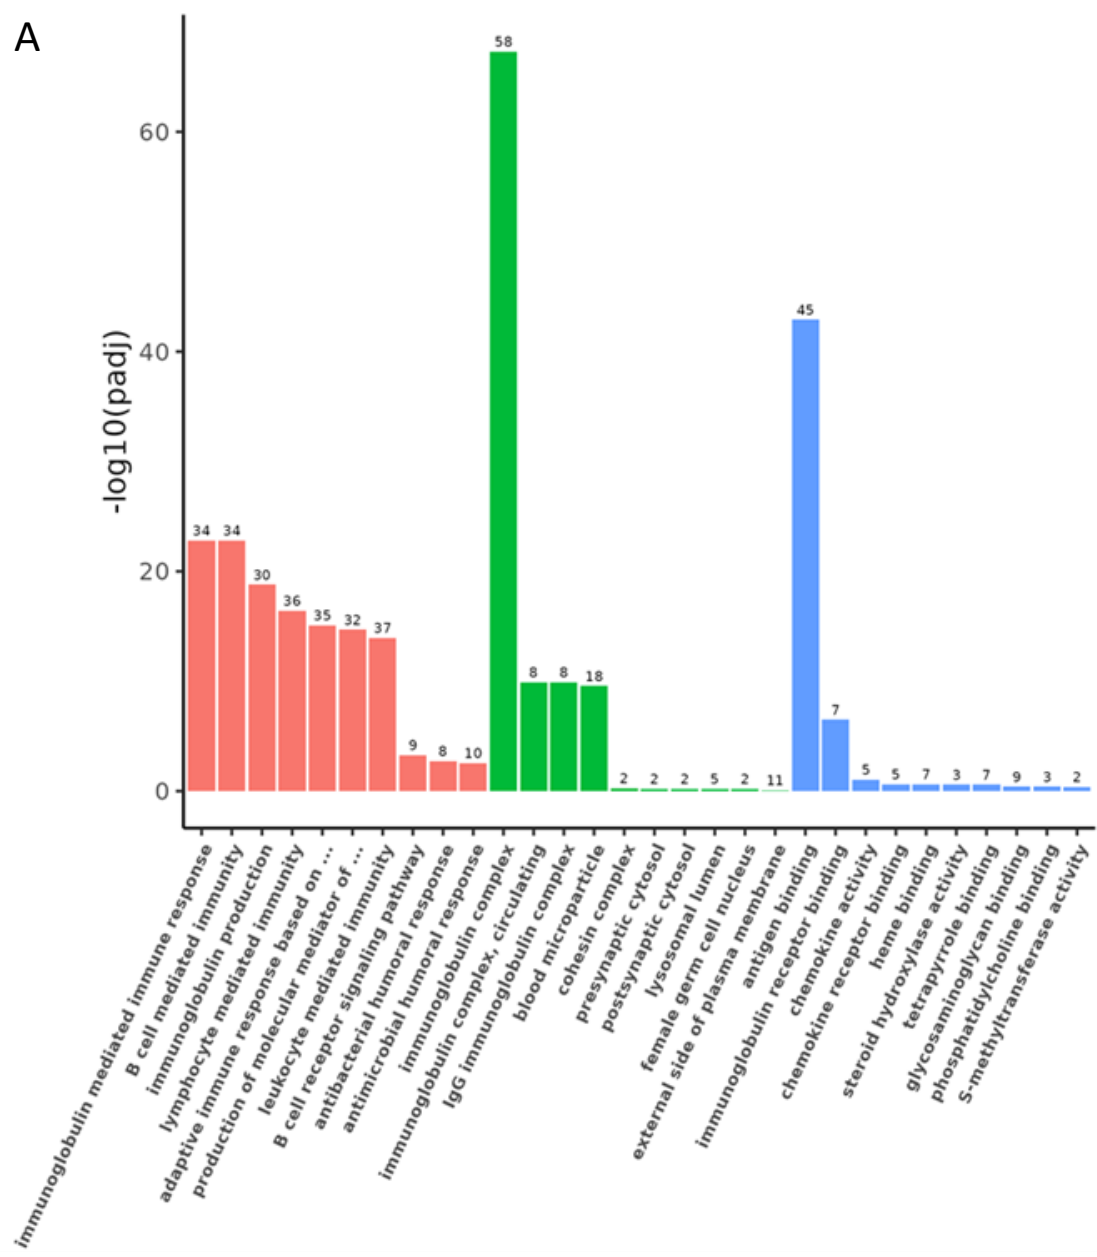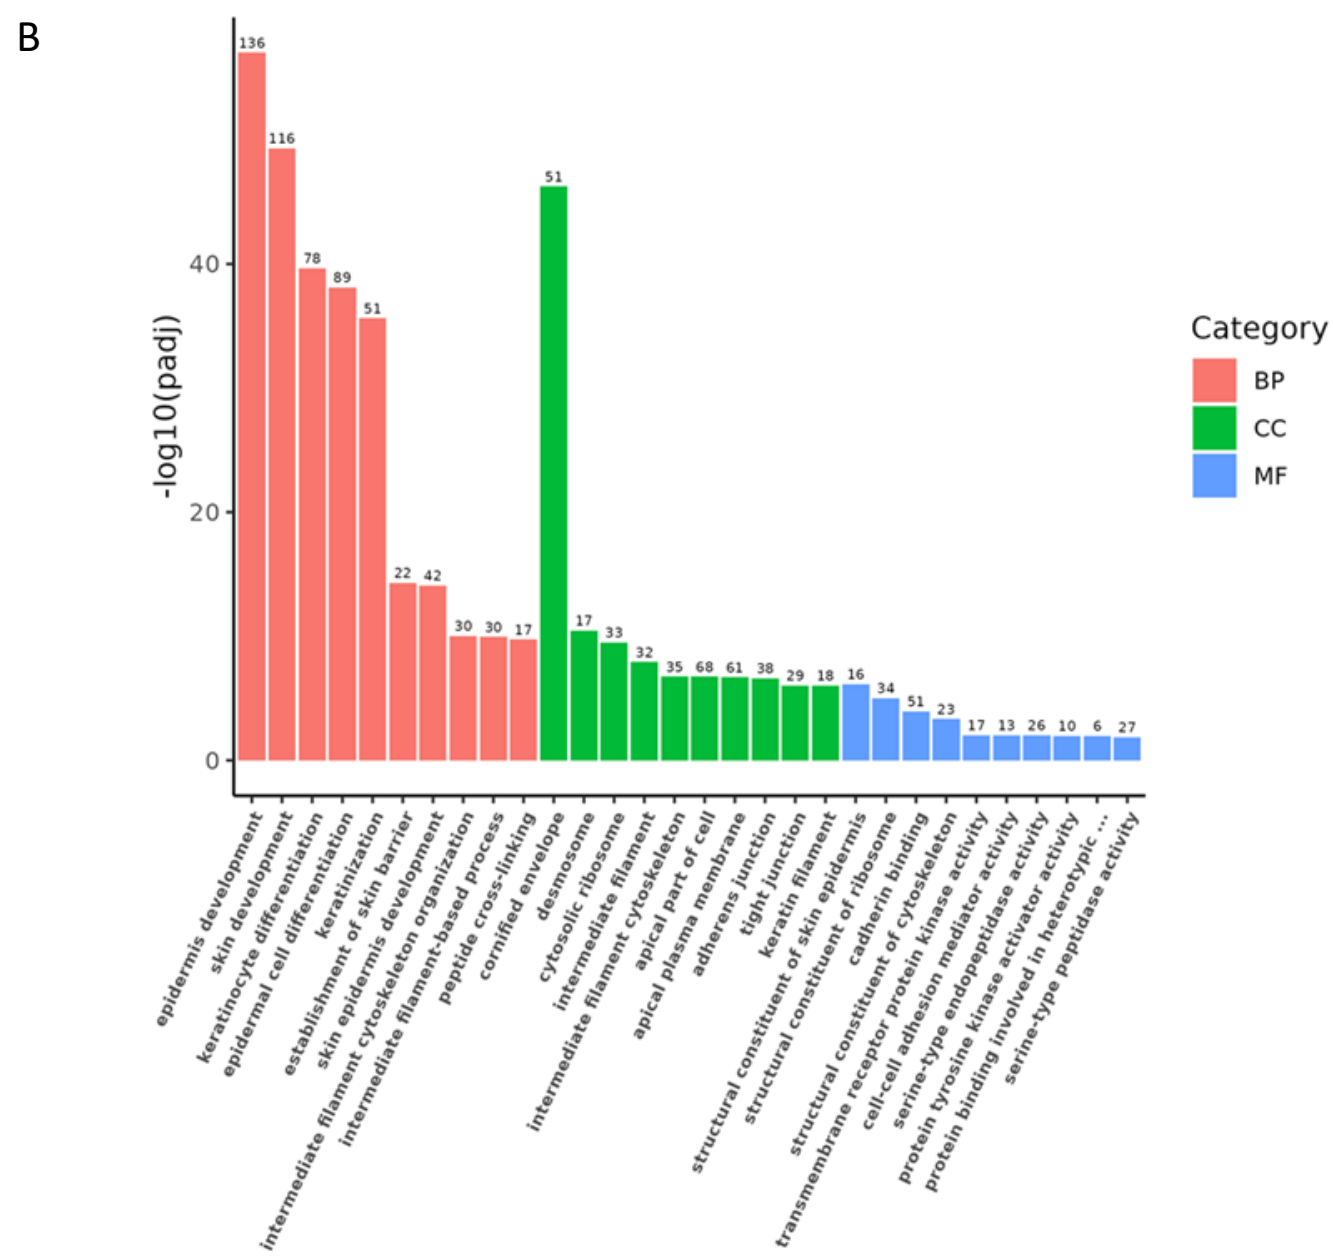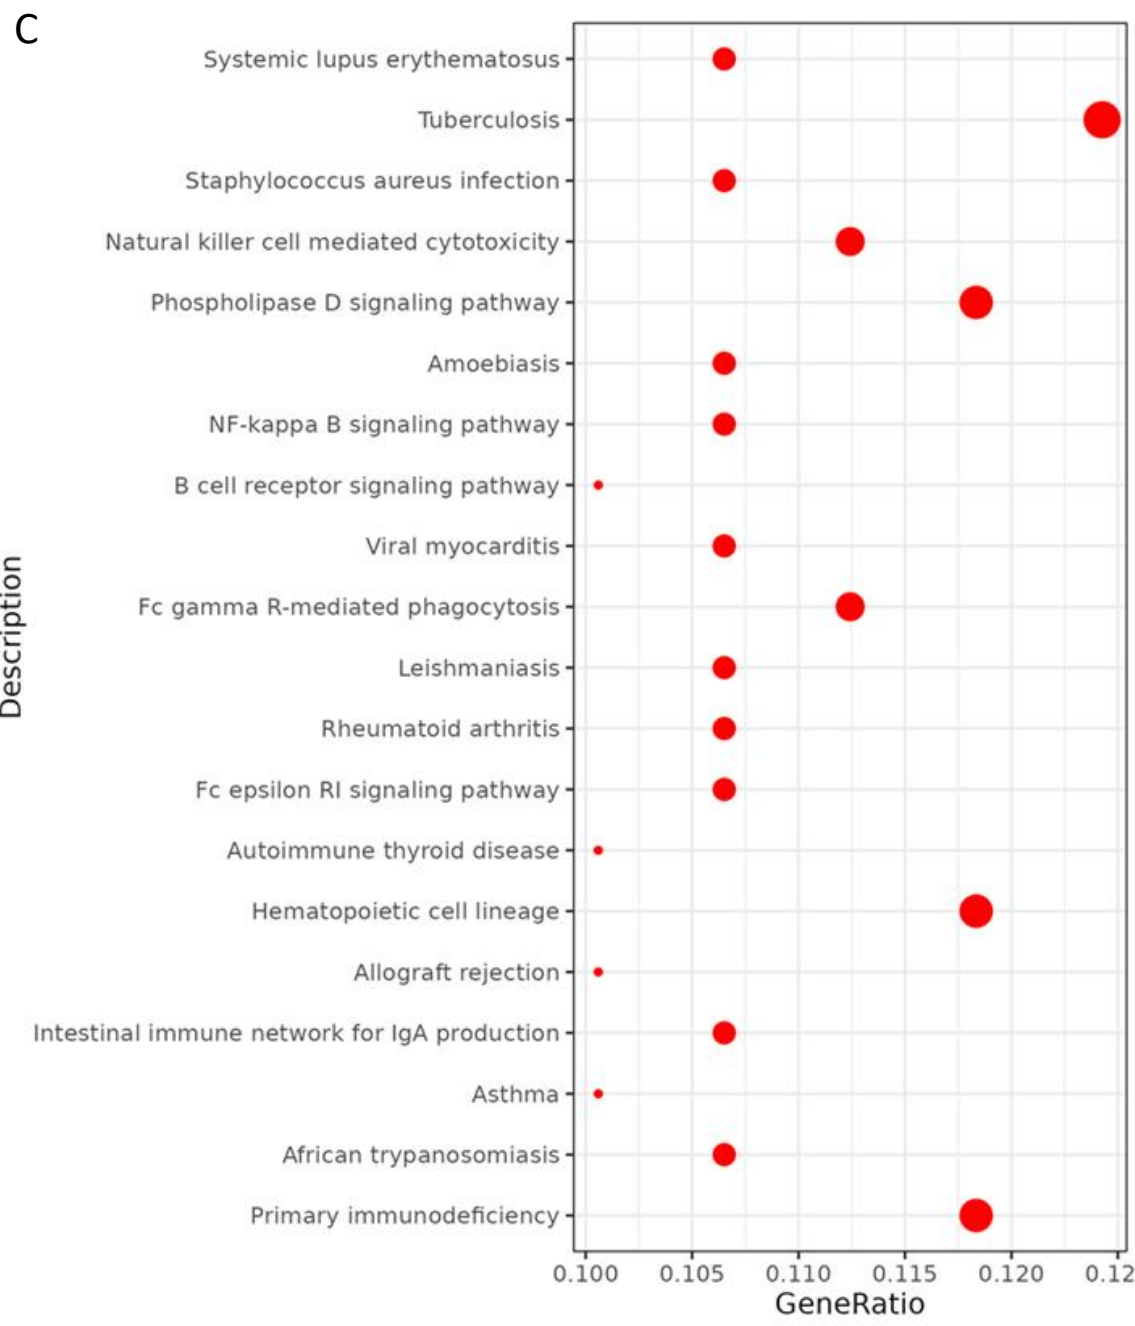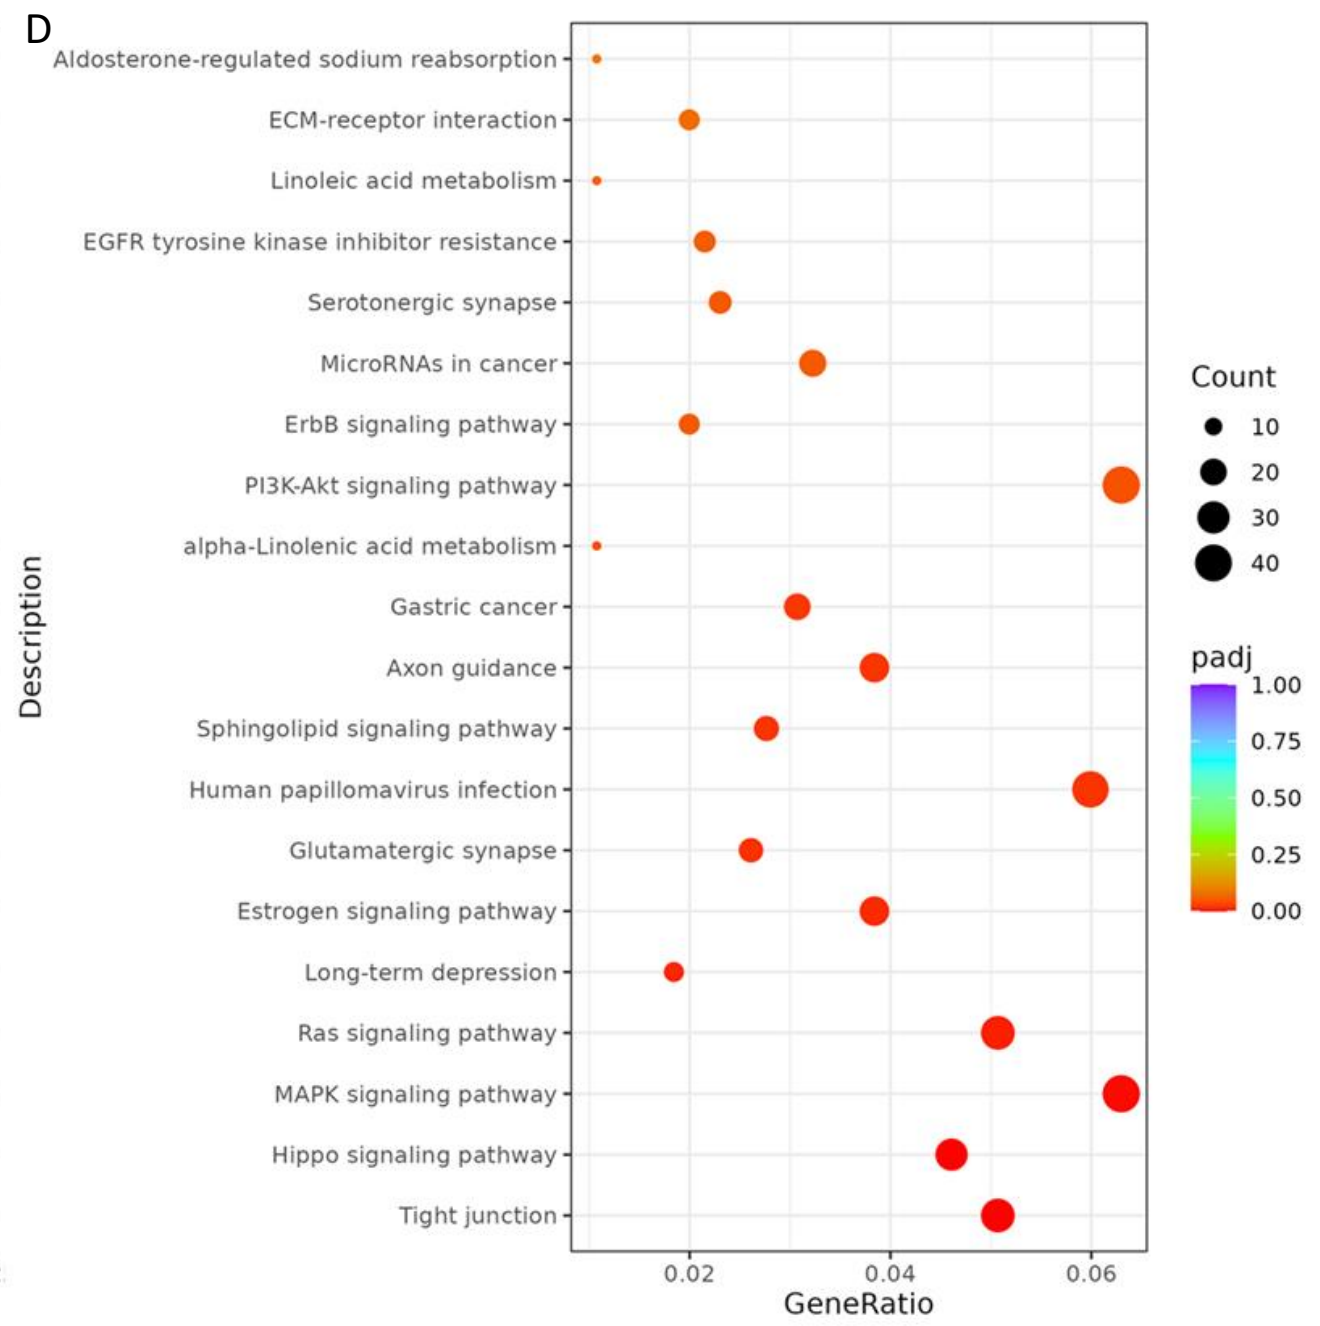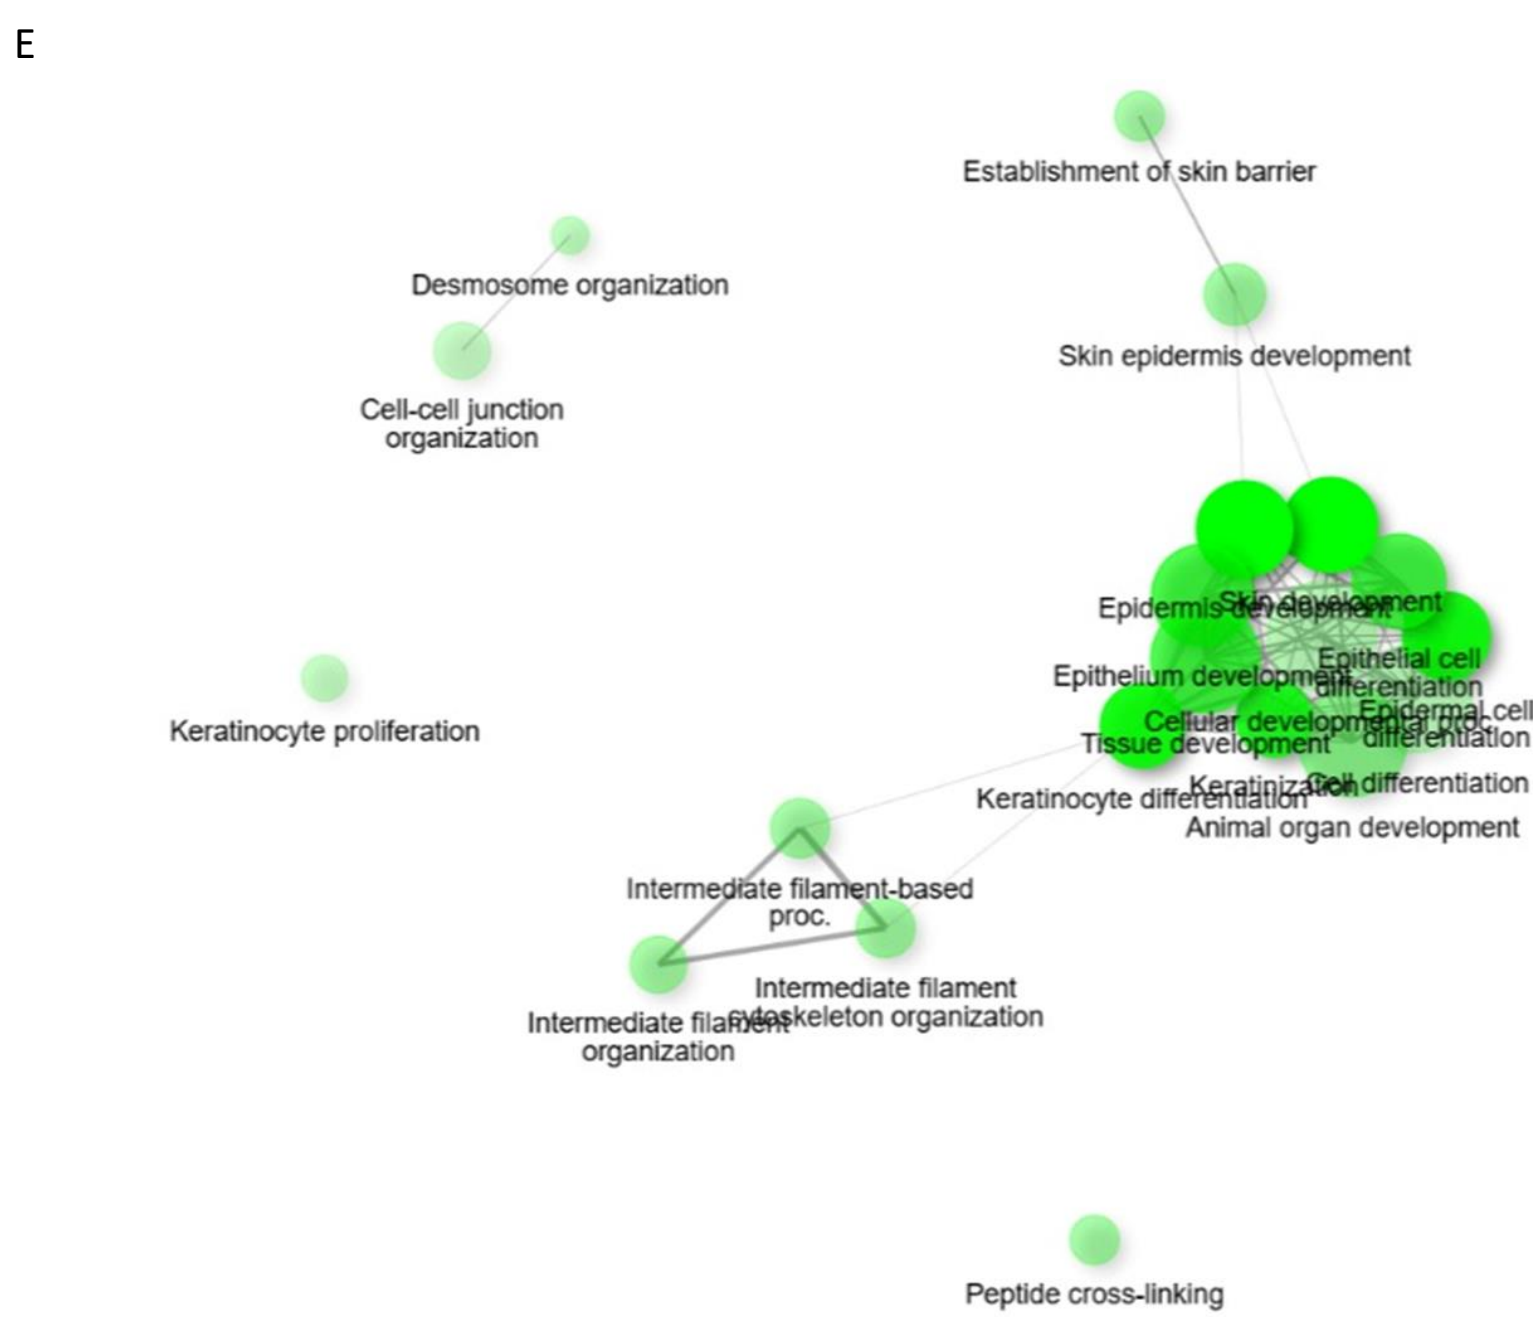

Supplement: Supplementary file 3 [file 37943f5d84e5fbe58abc22bd.pdf]

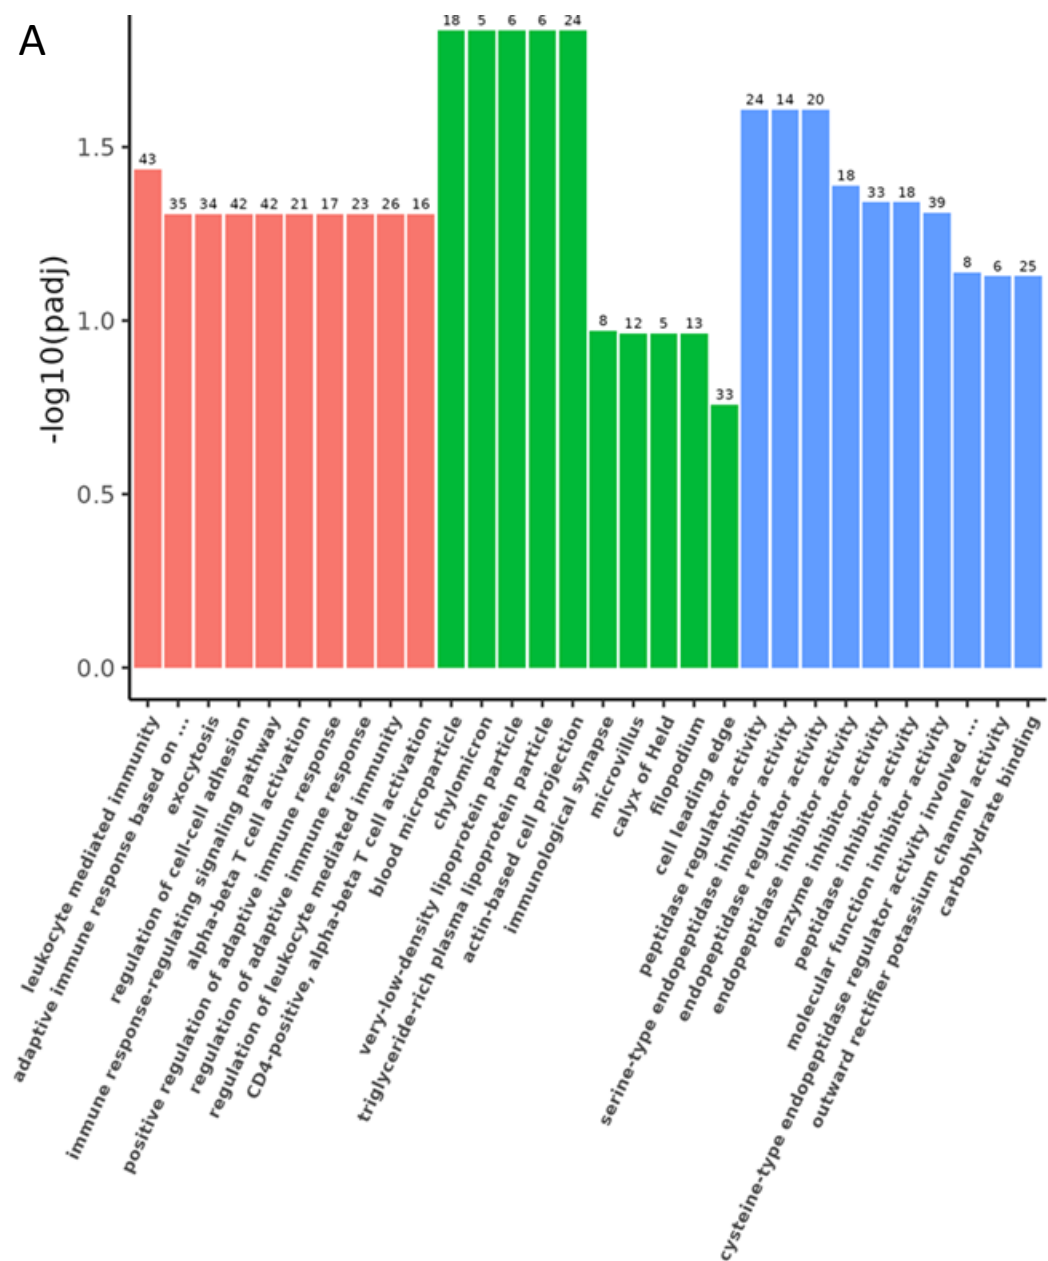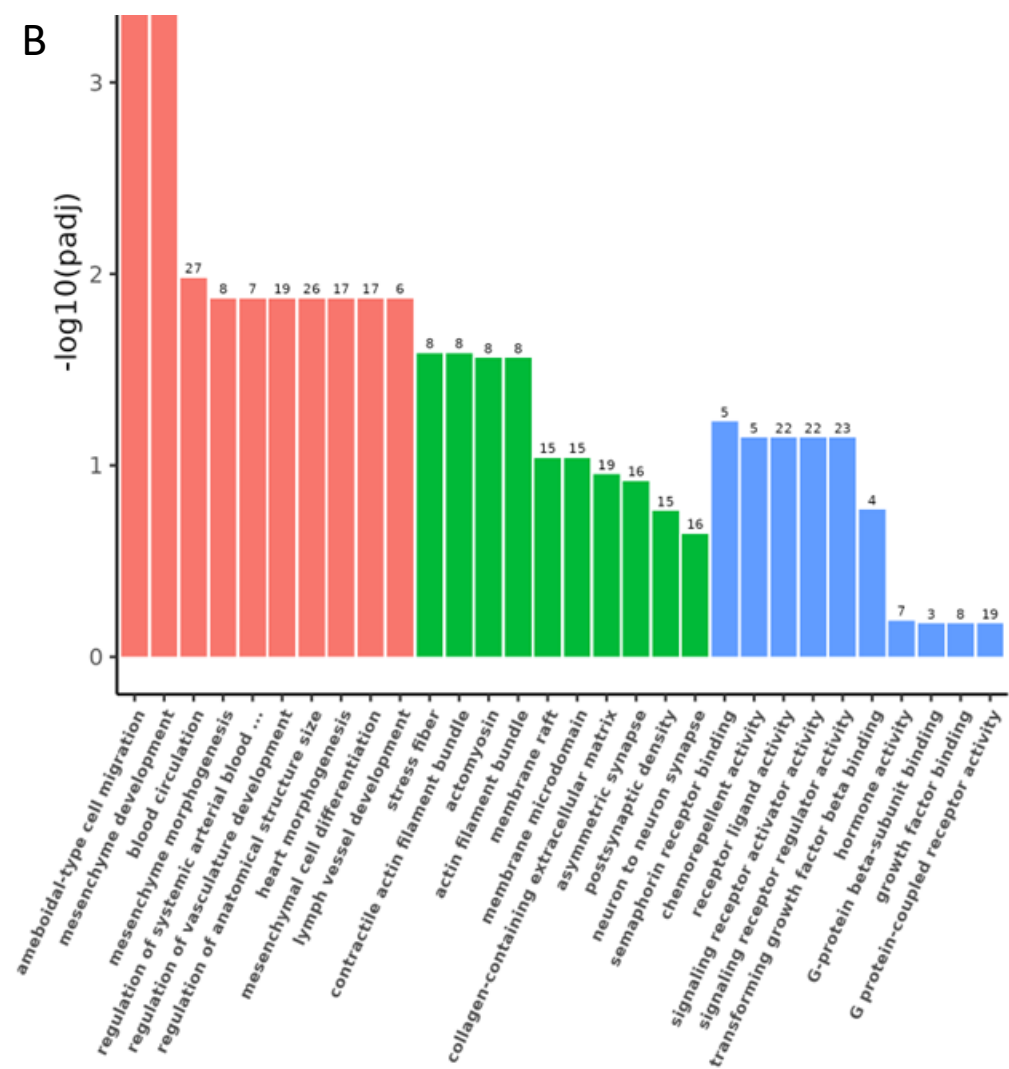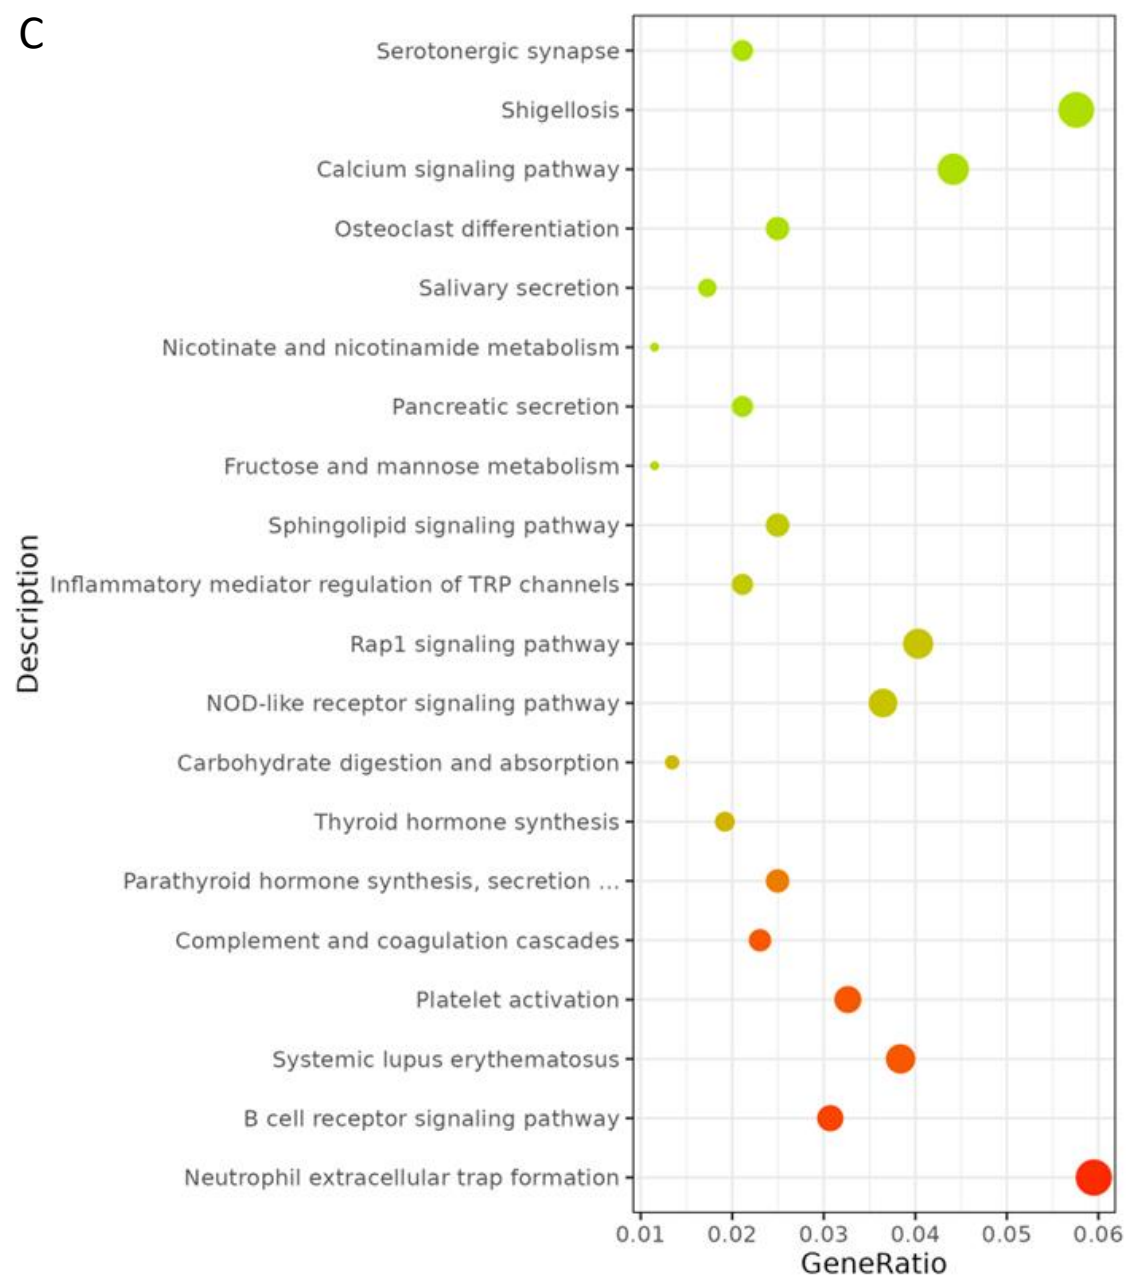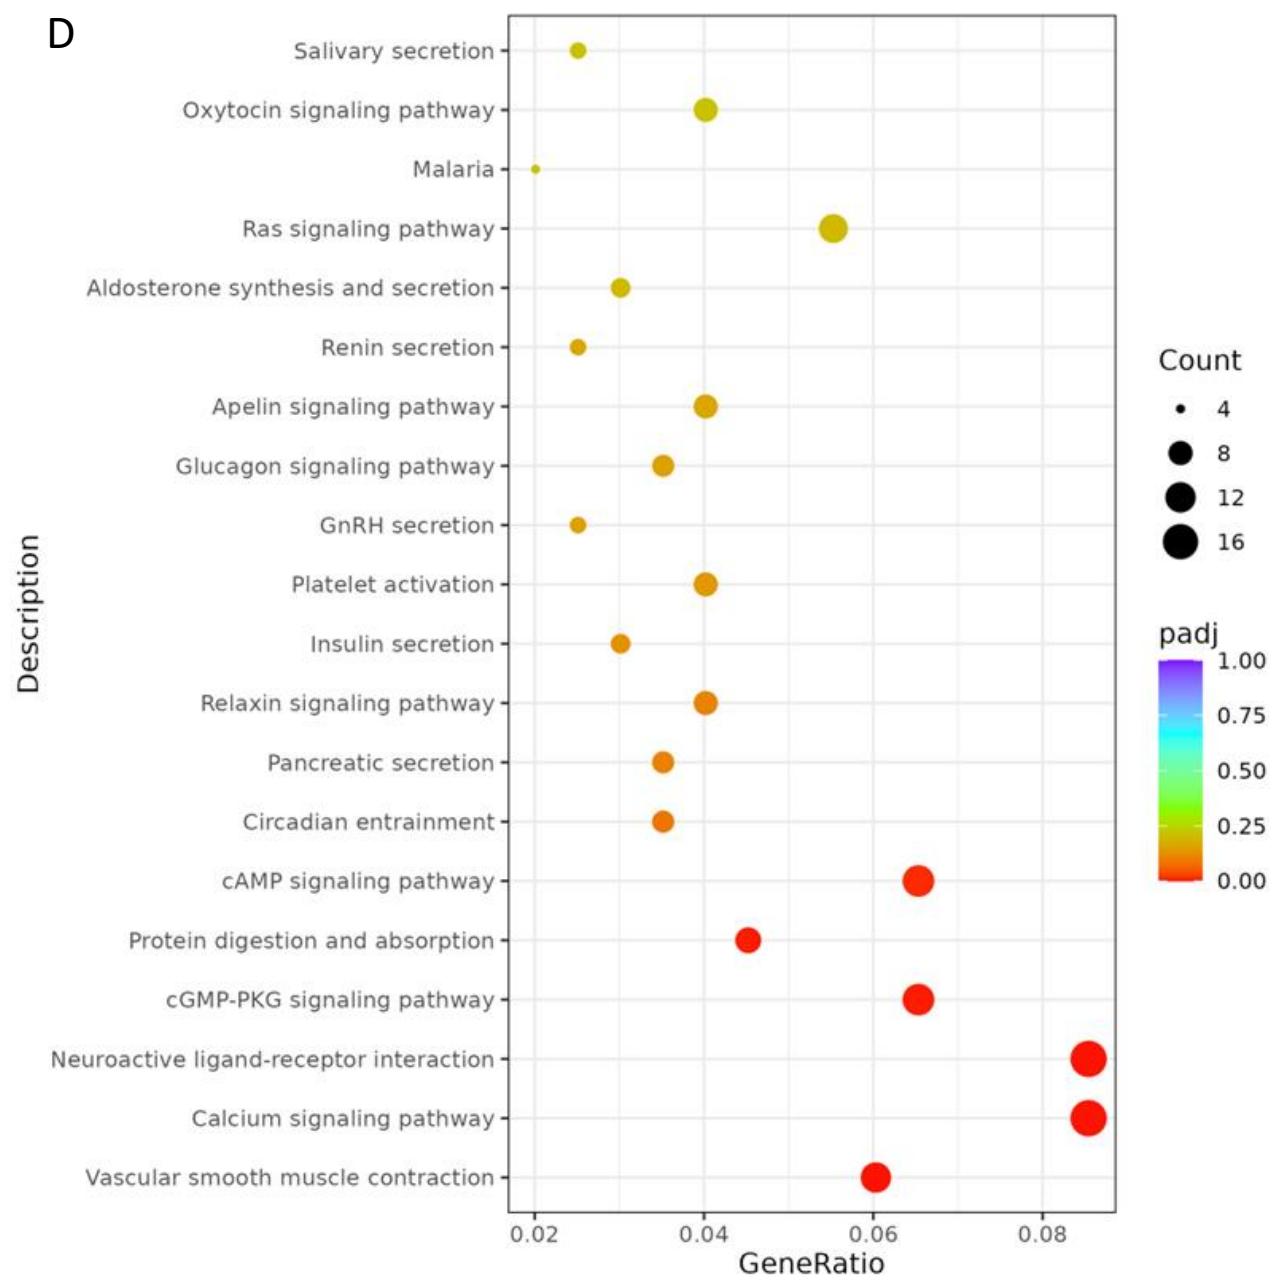

Supplement: Supplementary file 4 [file 504ce0bf325828333ee4a9ba.pdf]

# A T cell associated genes

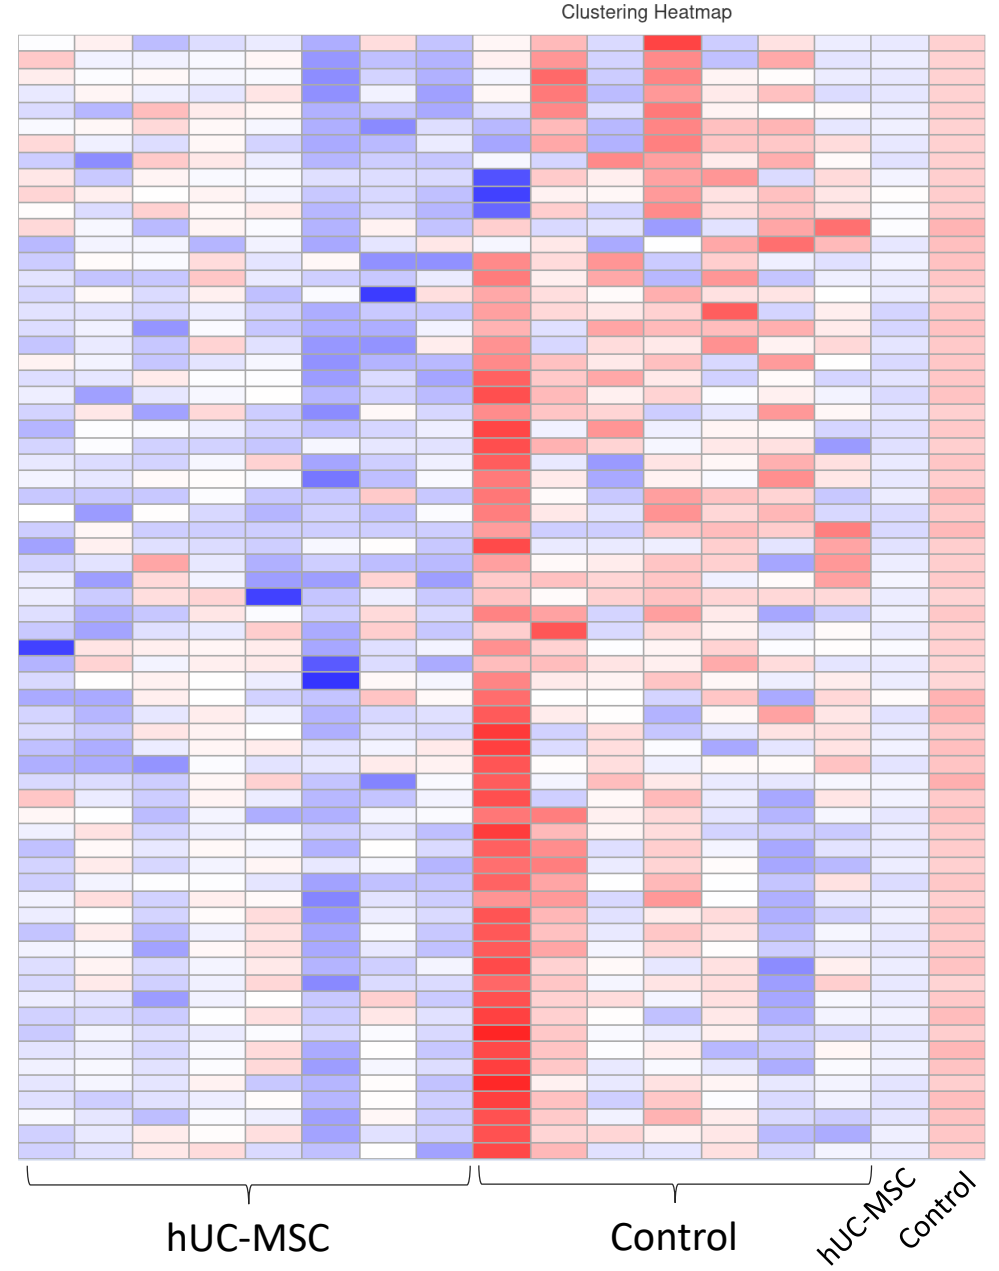

# Myeloid cells associated genes

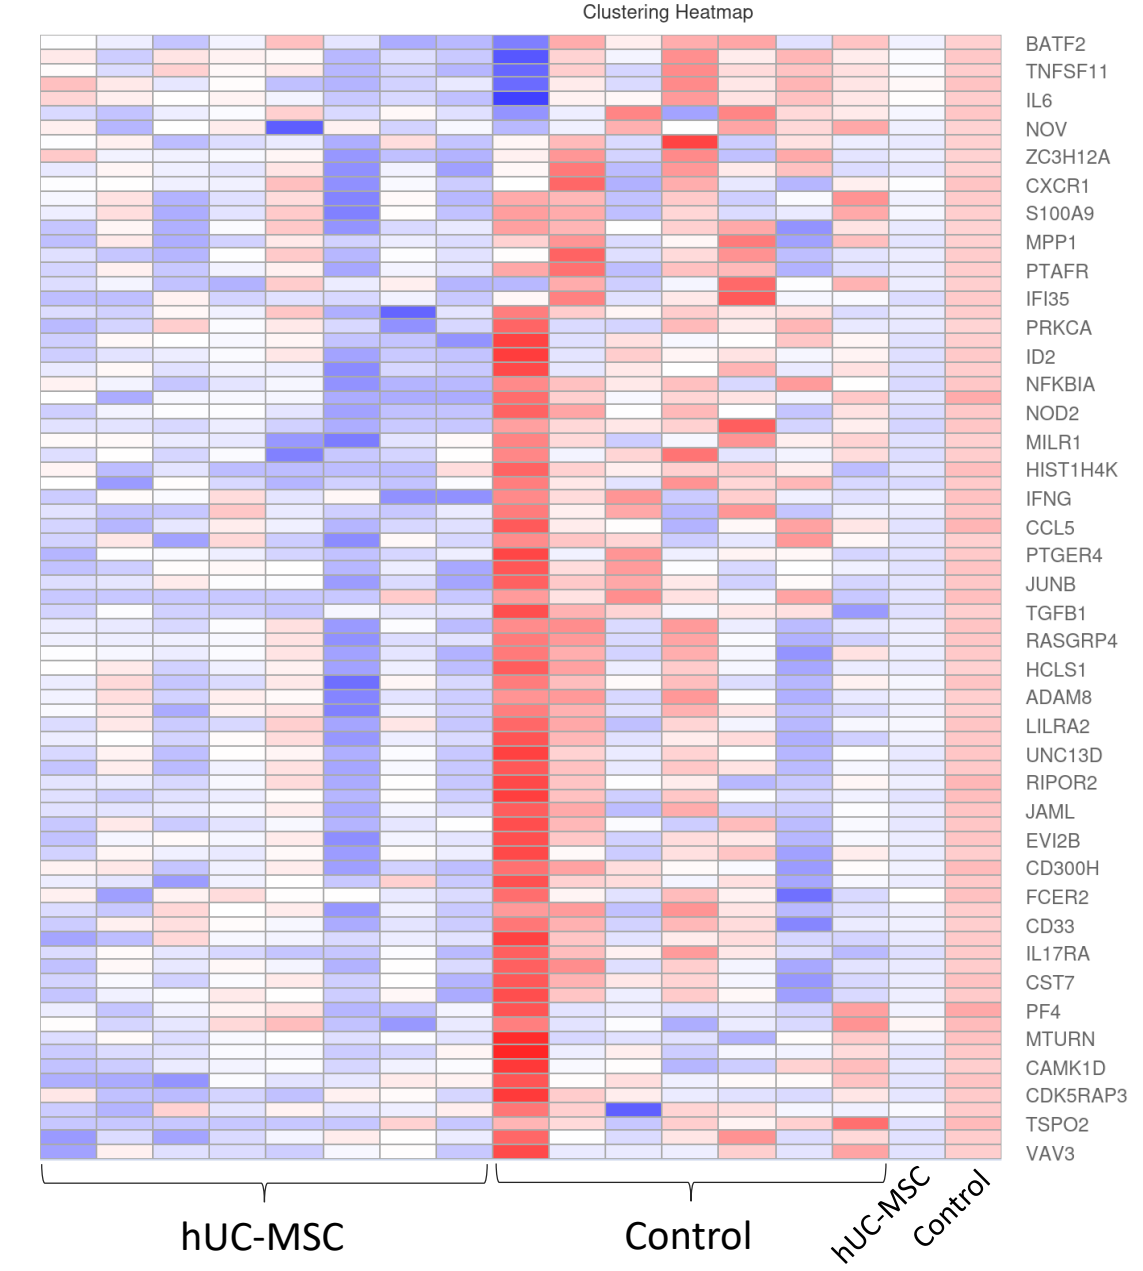

# Macrophages associated genes

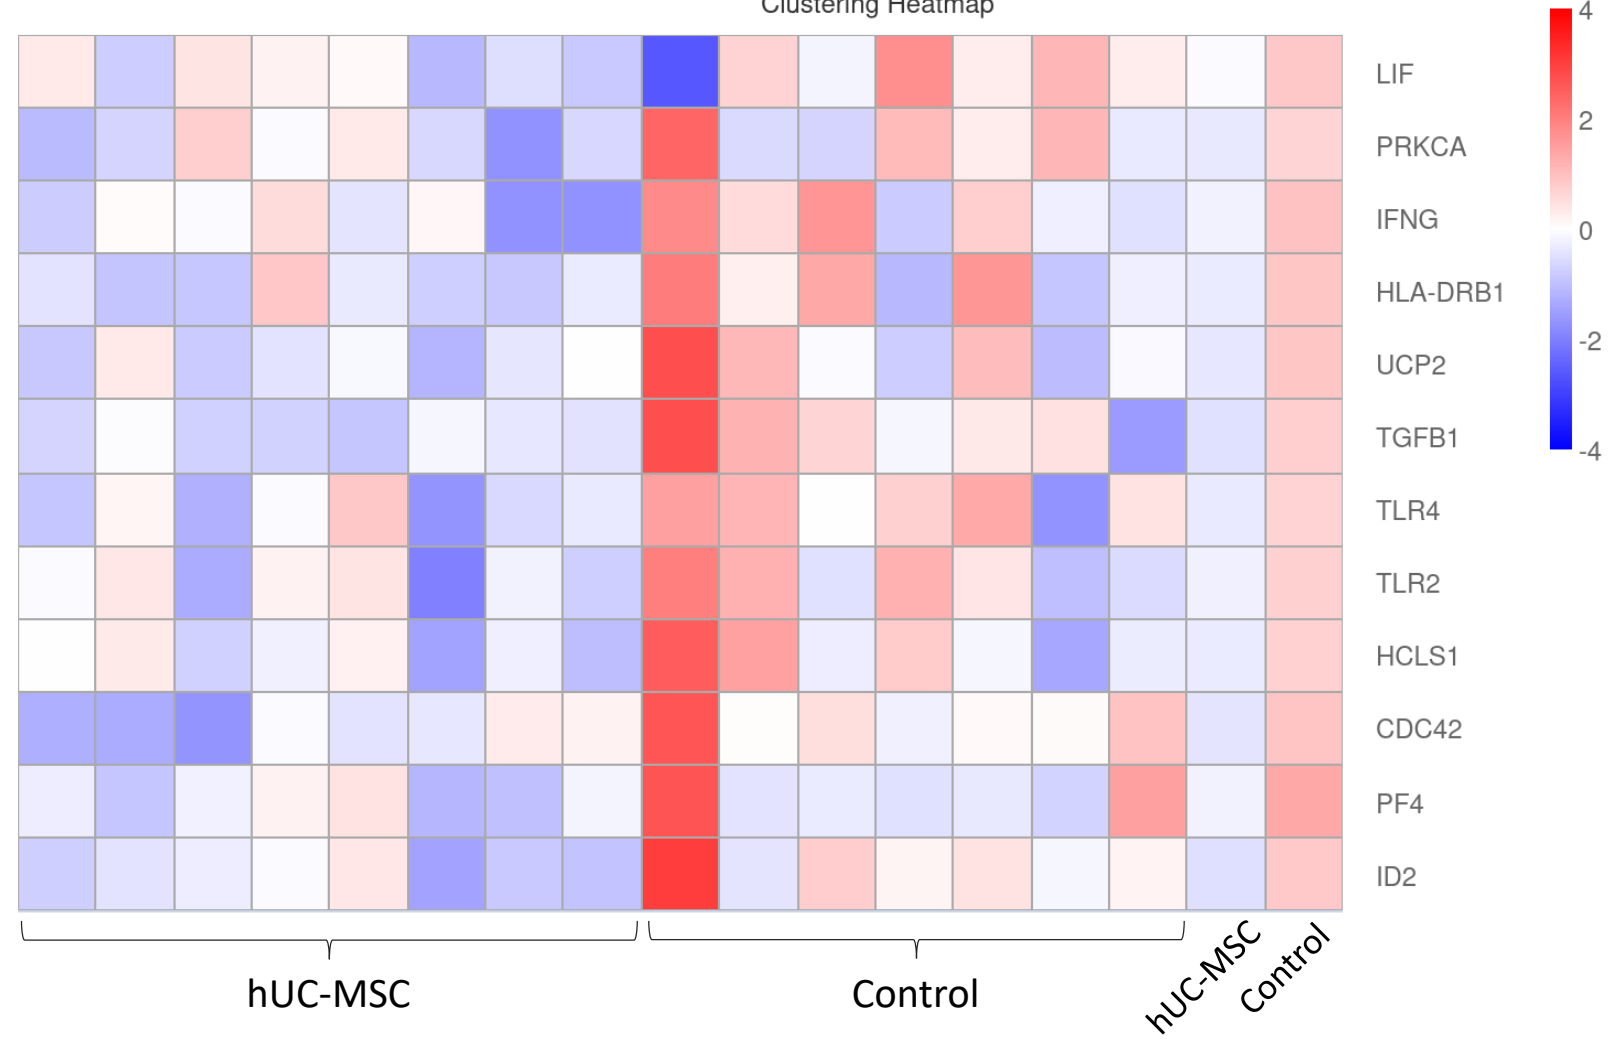

# B

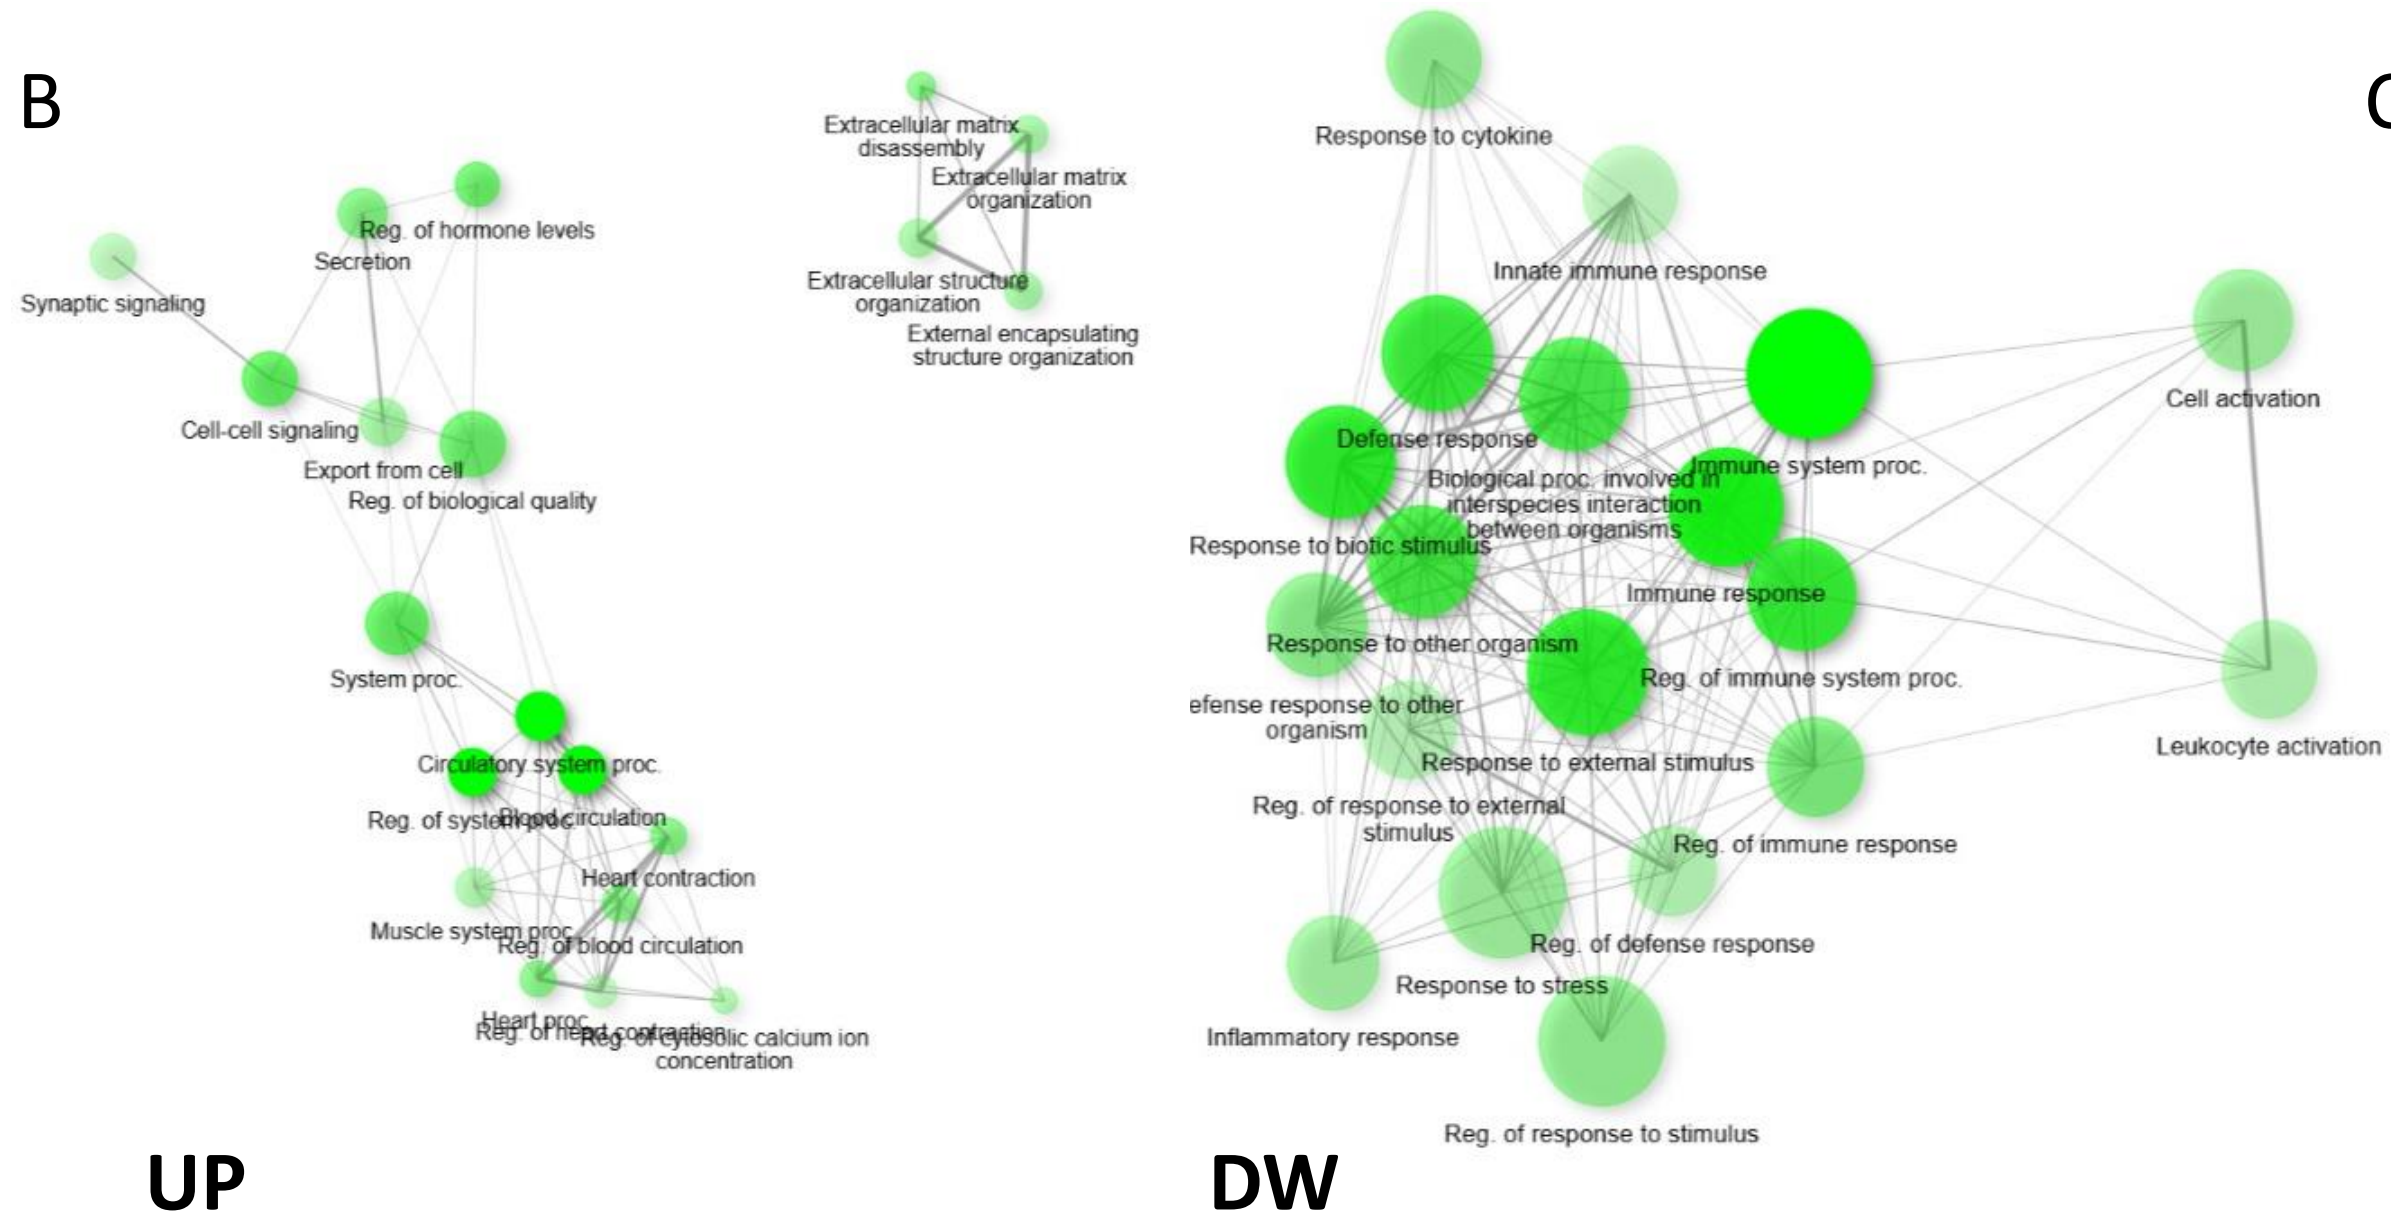

# C

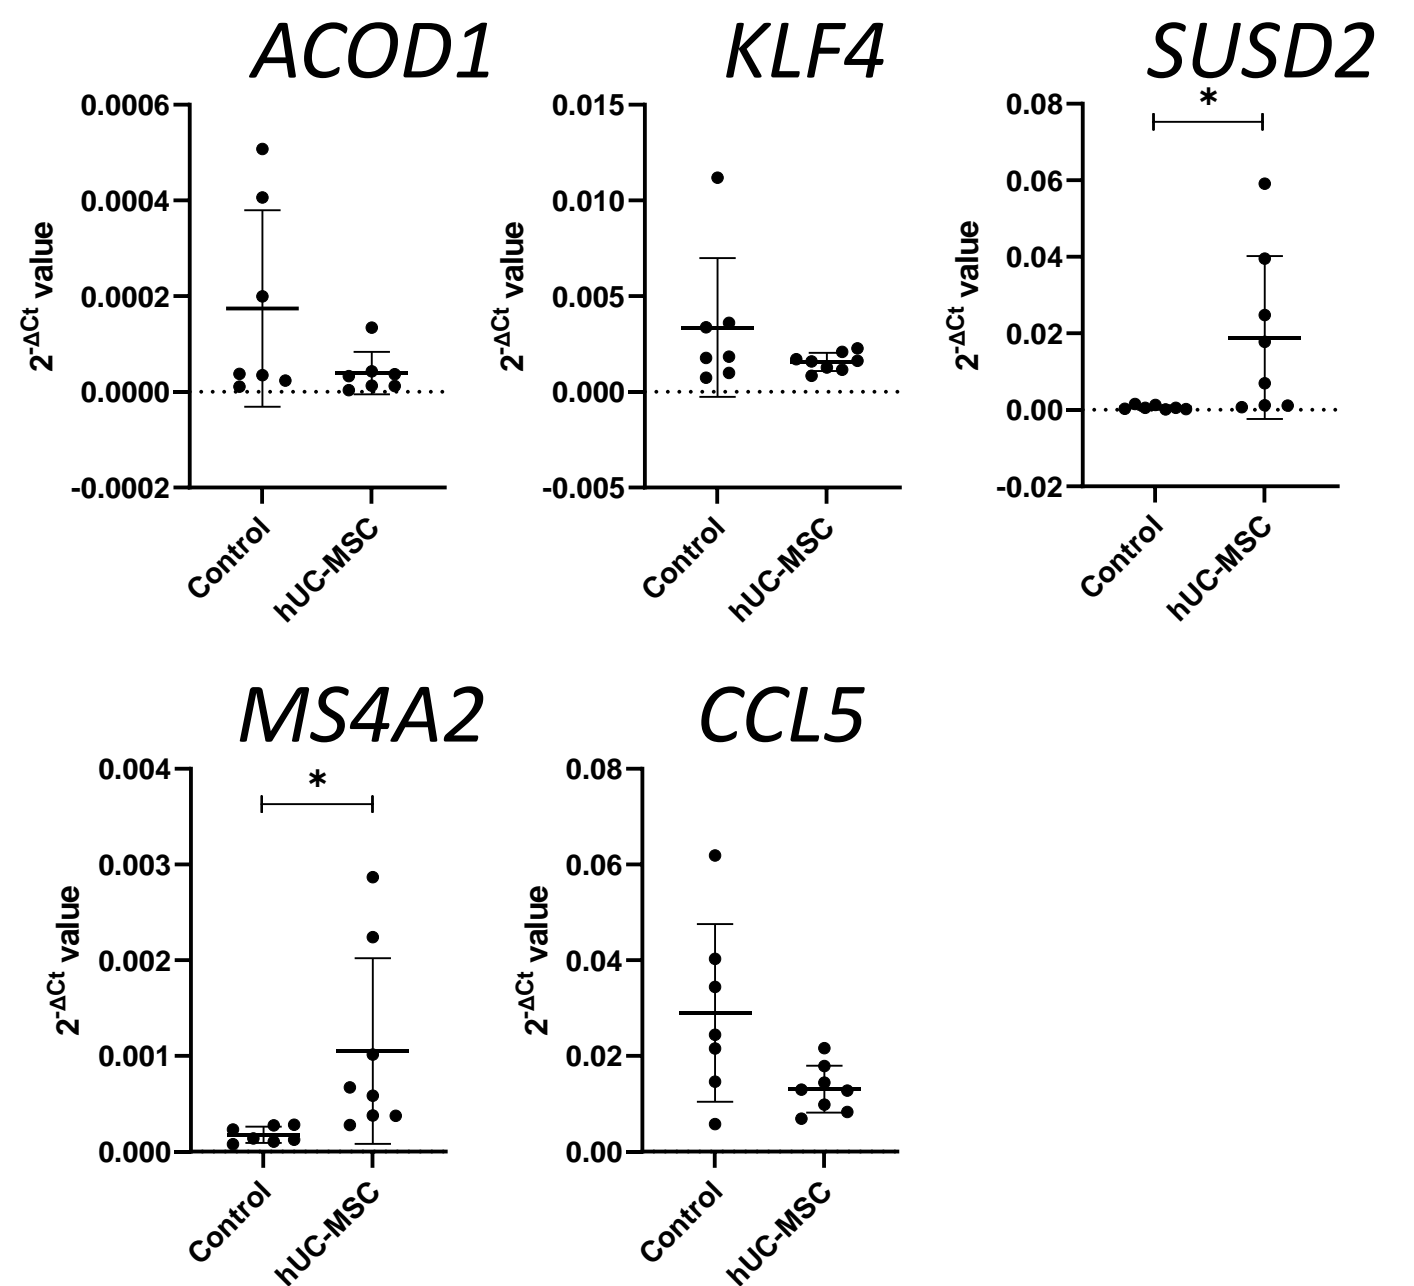

Supplement: Supplementary file 5 [file 5a824993d5907c76c81588a7.pdf]

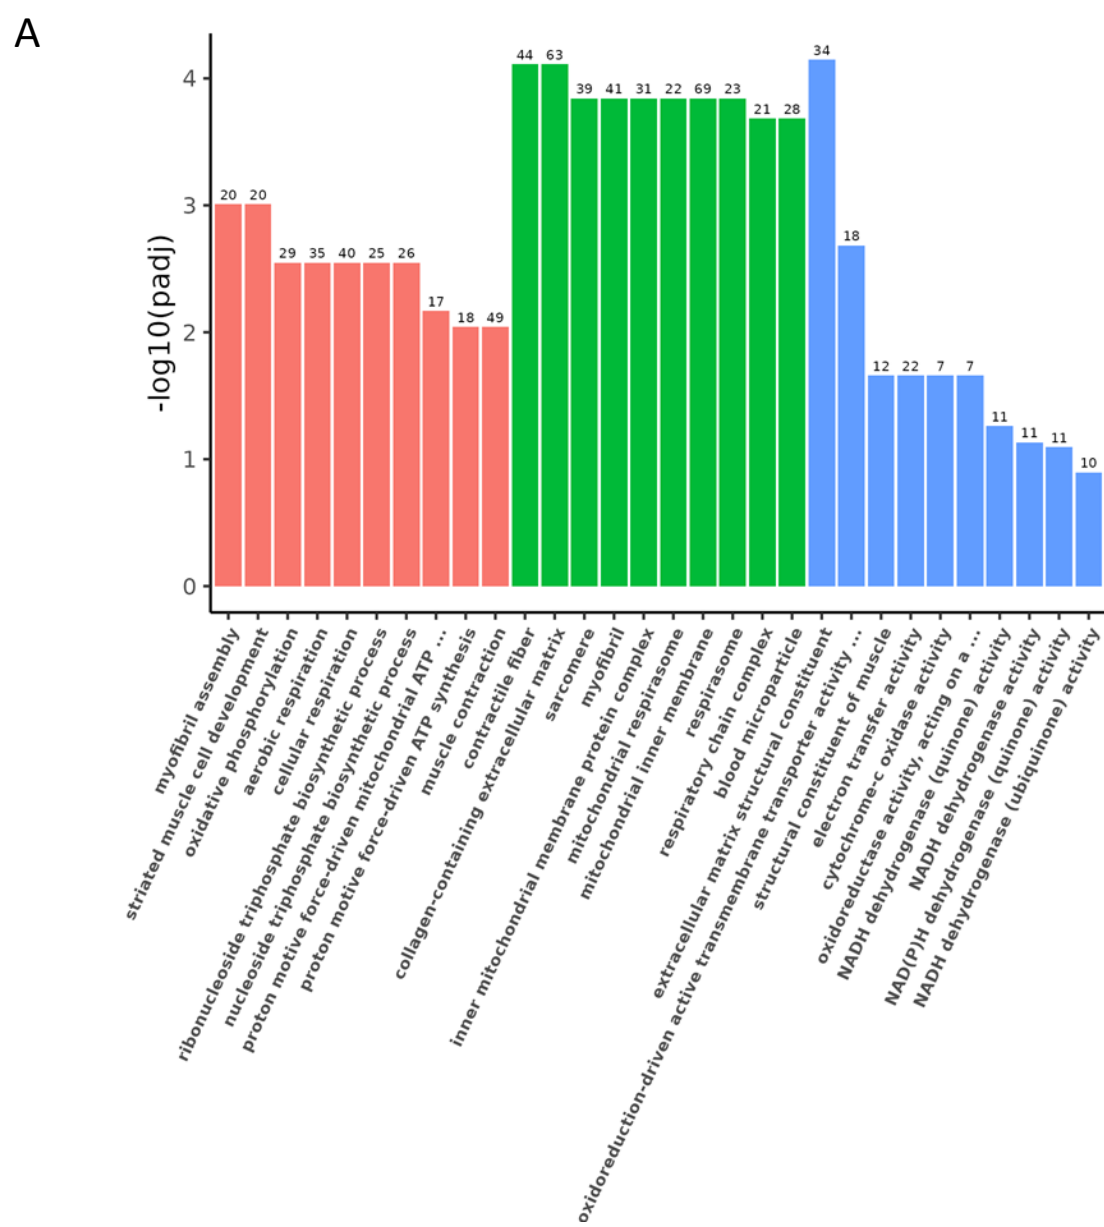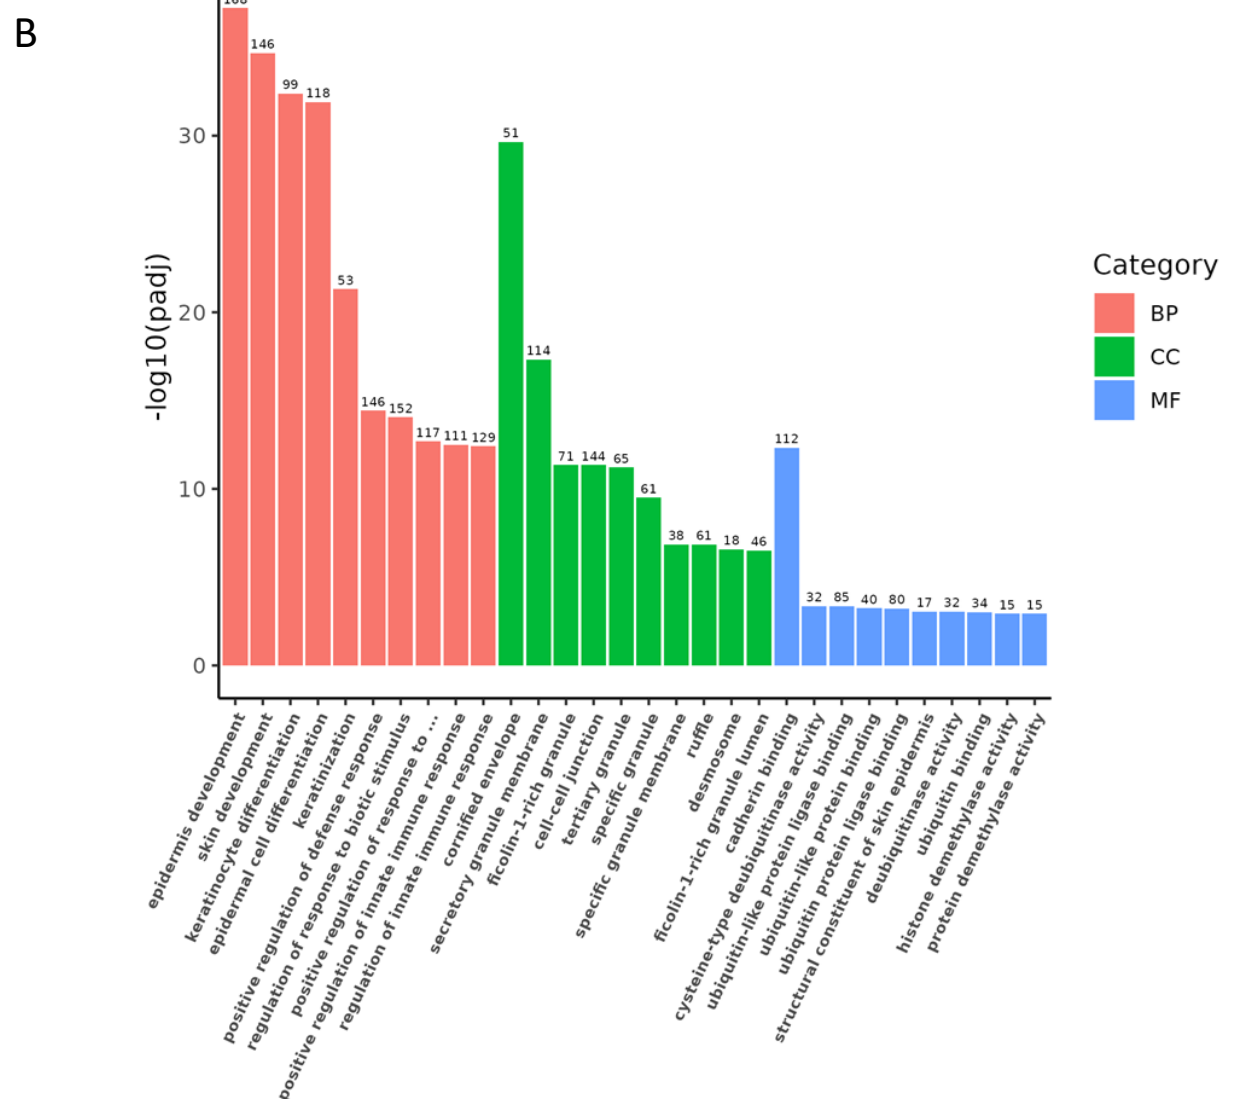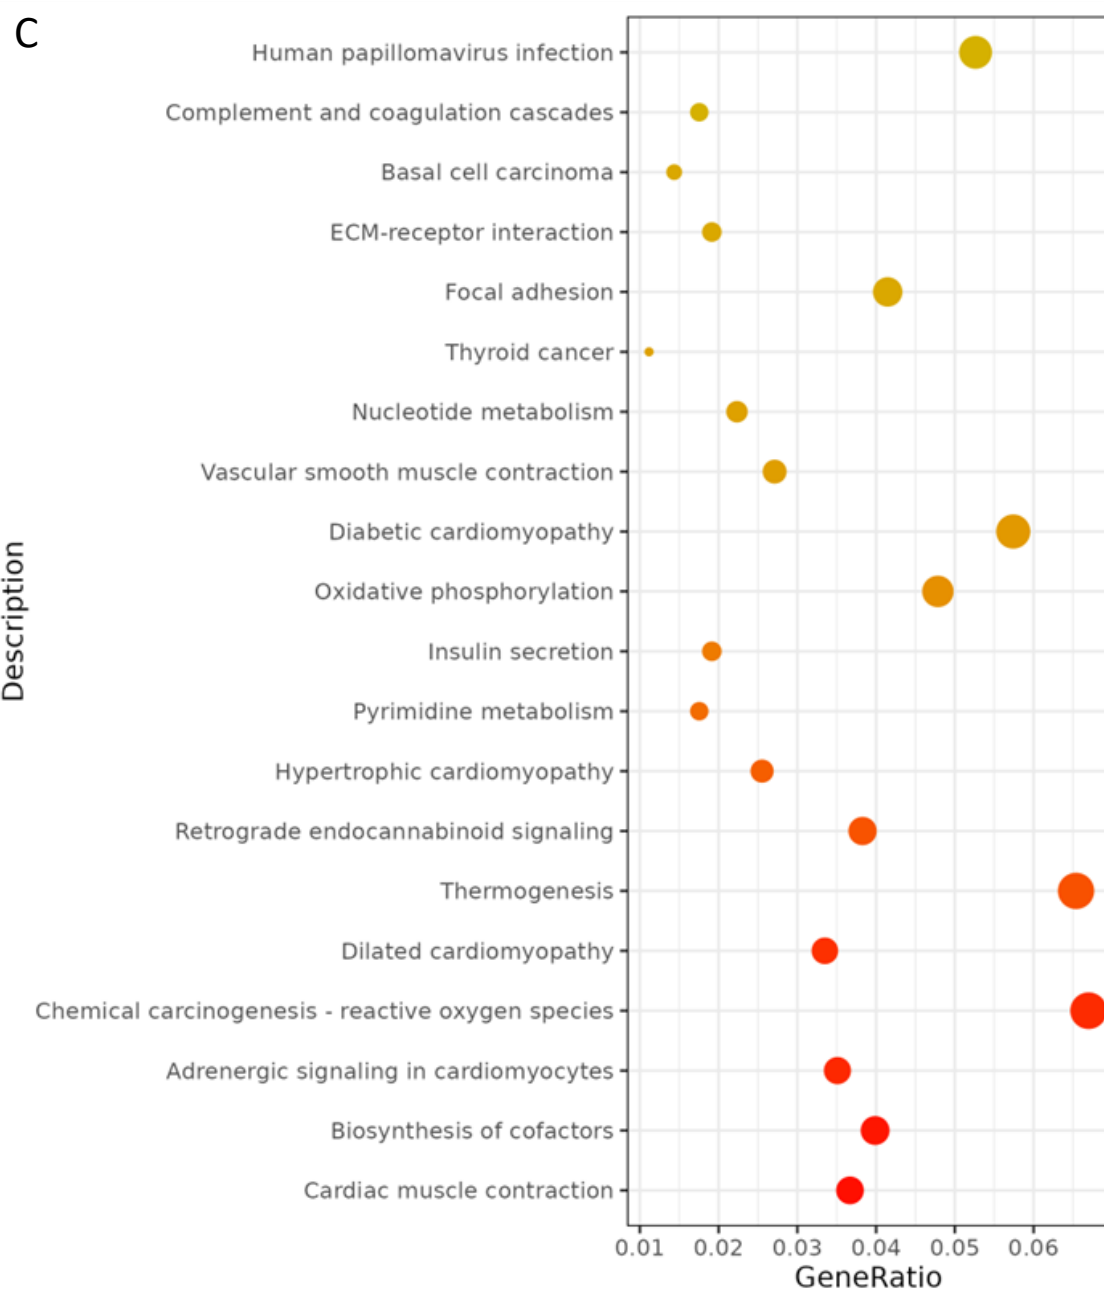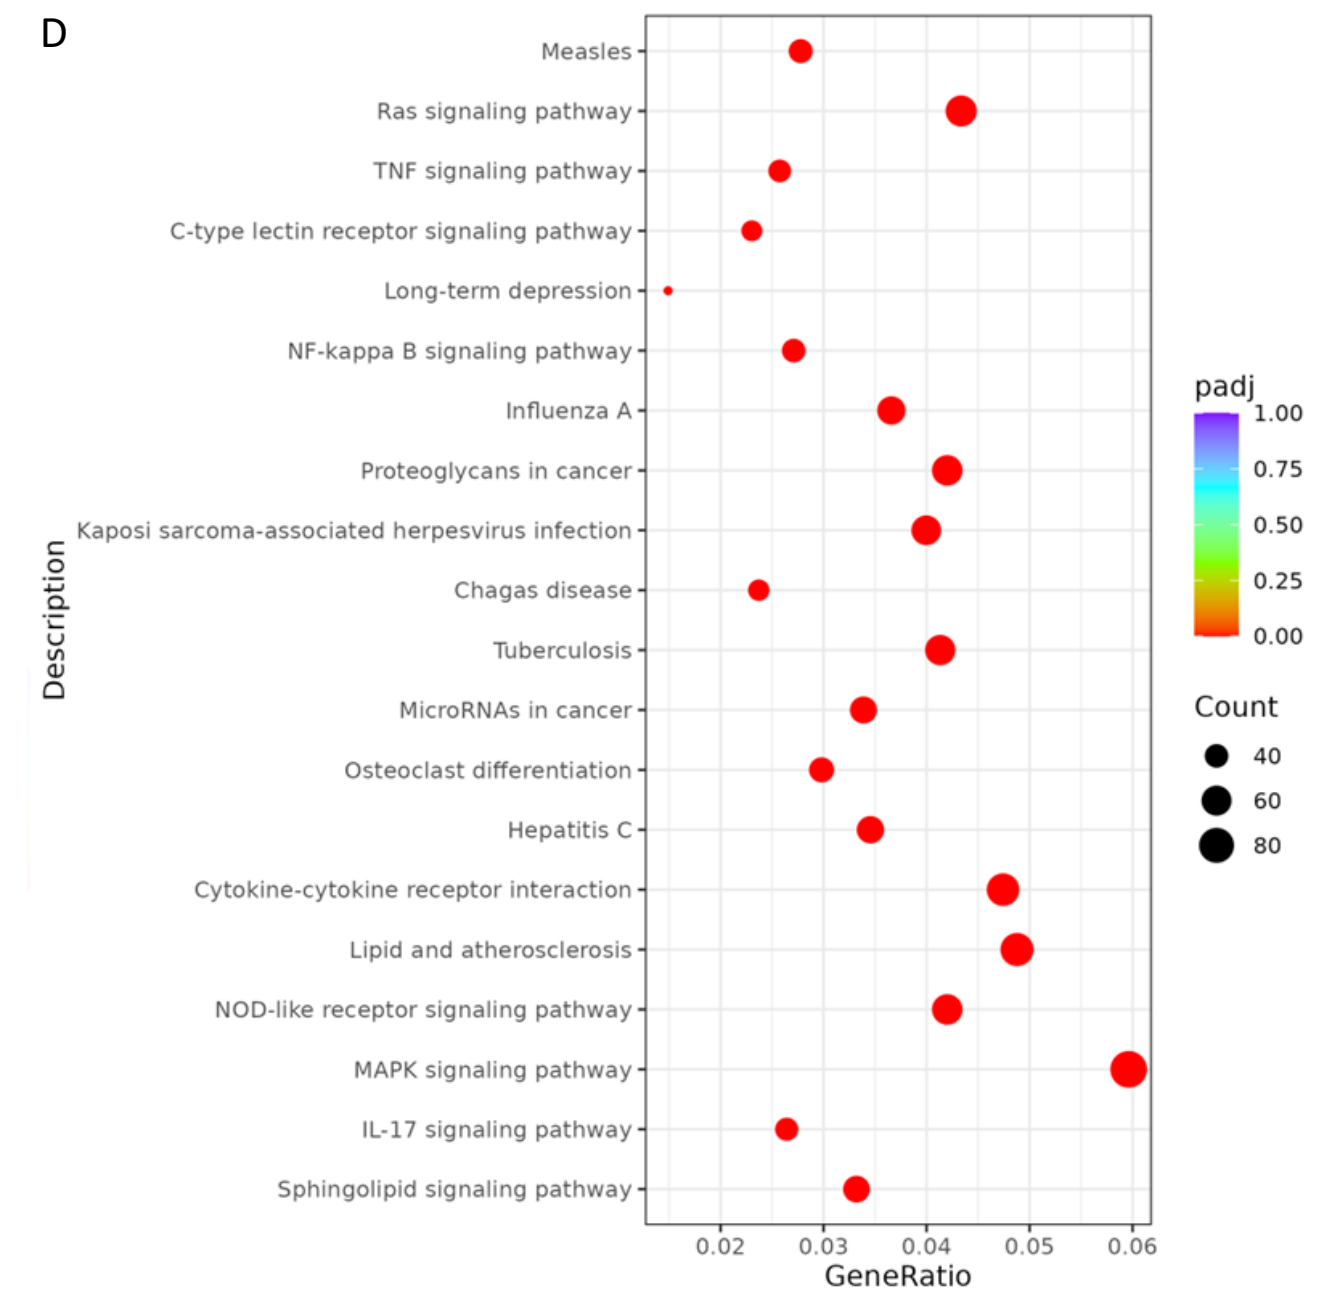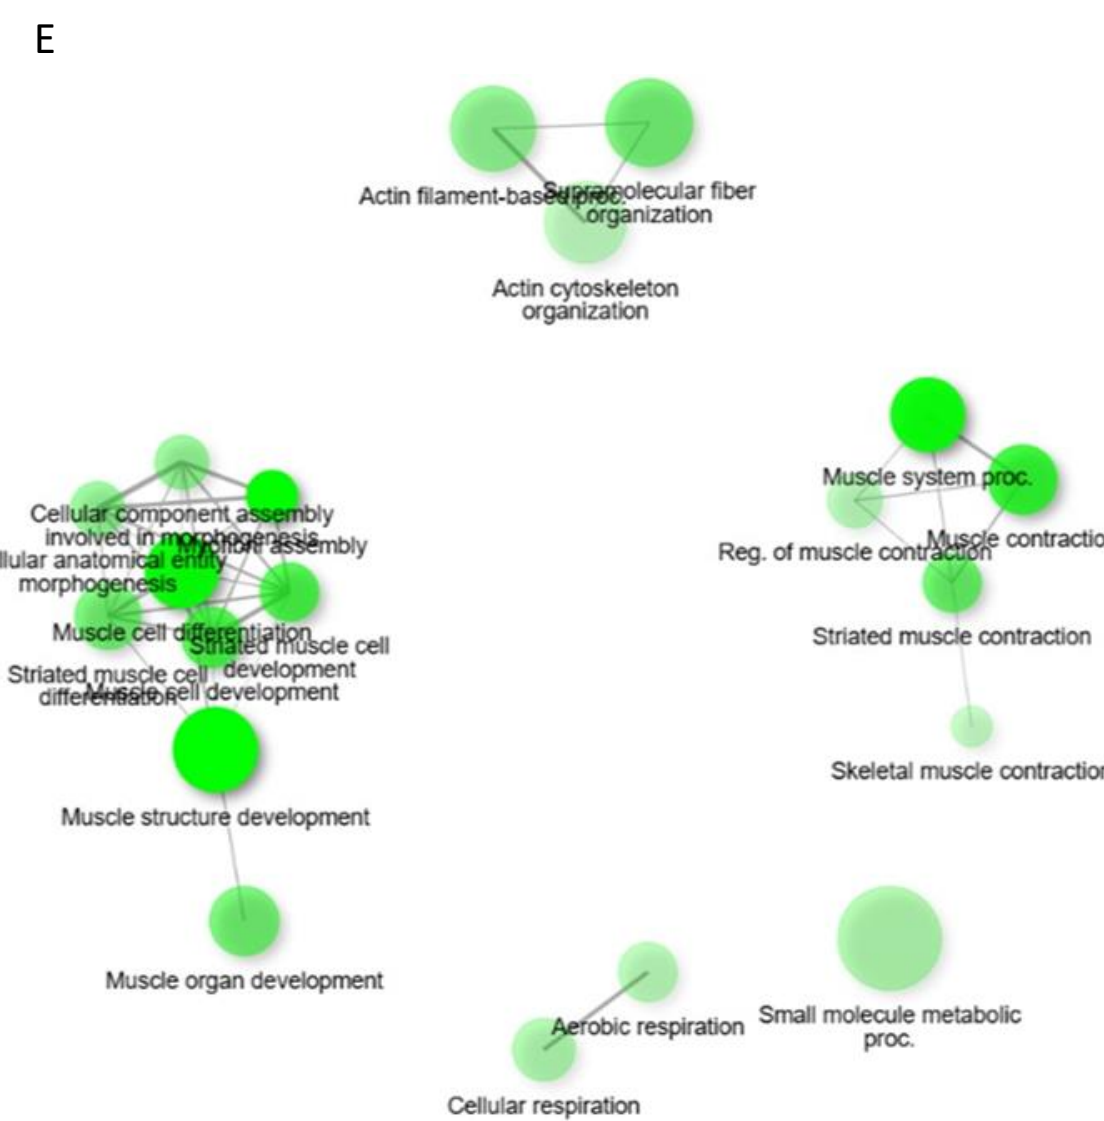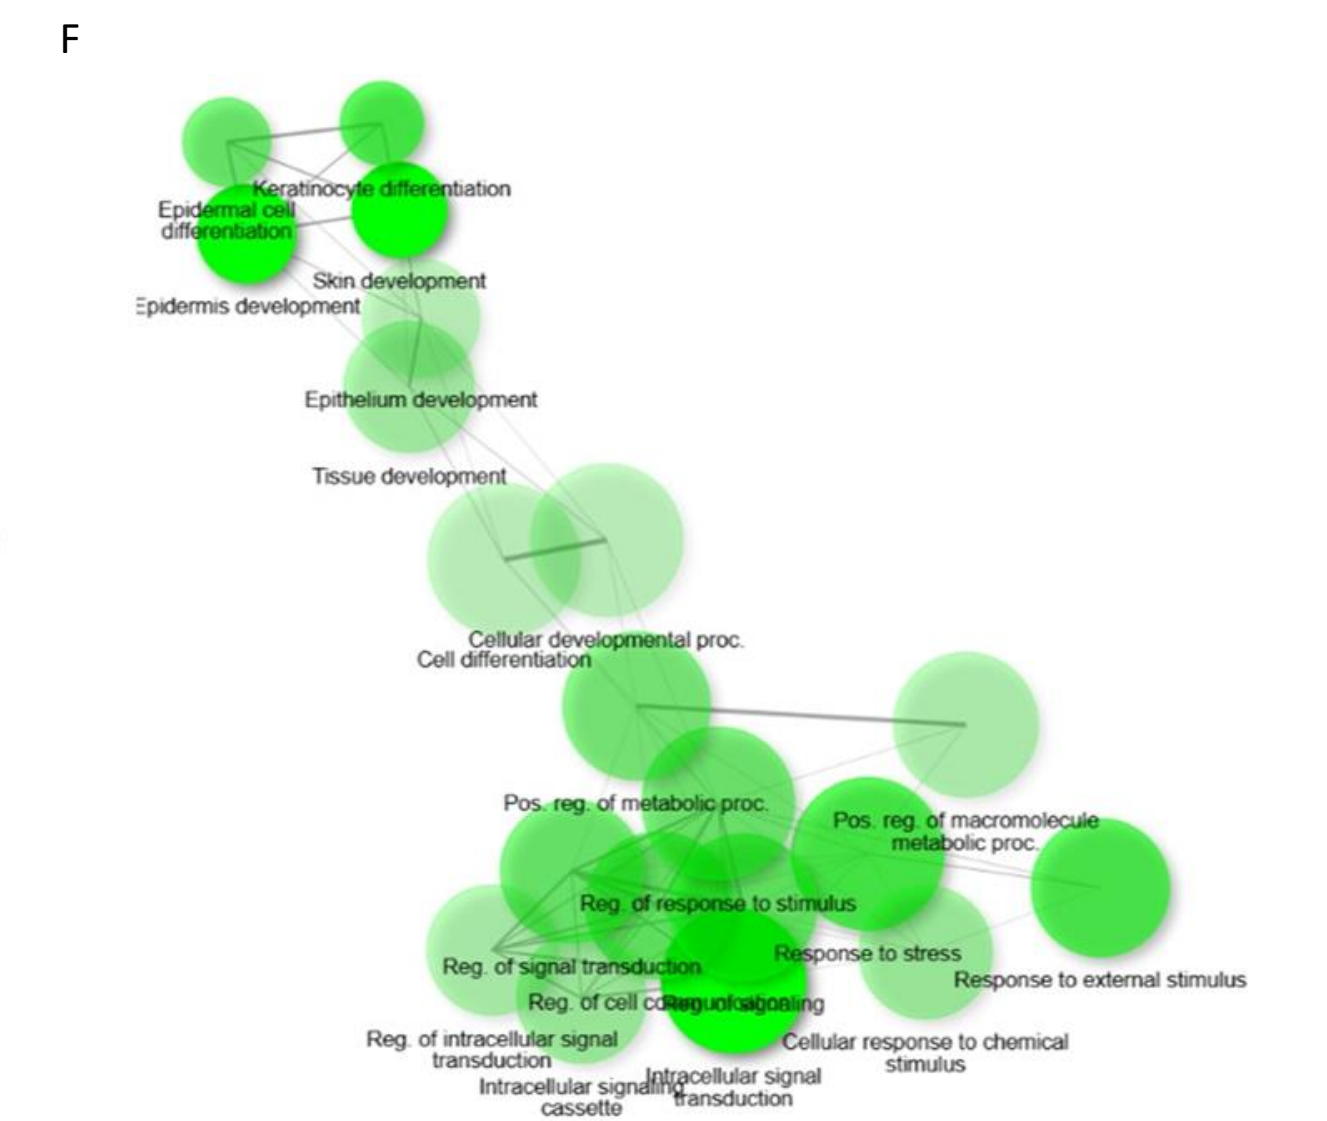

Supplement: Supplementary file 6 [file ca5b55d2c9bdb723a49e16f2.pdf]

**A**

**Immune-associated genes**

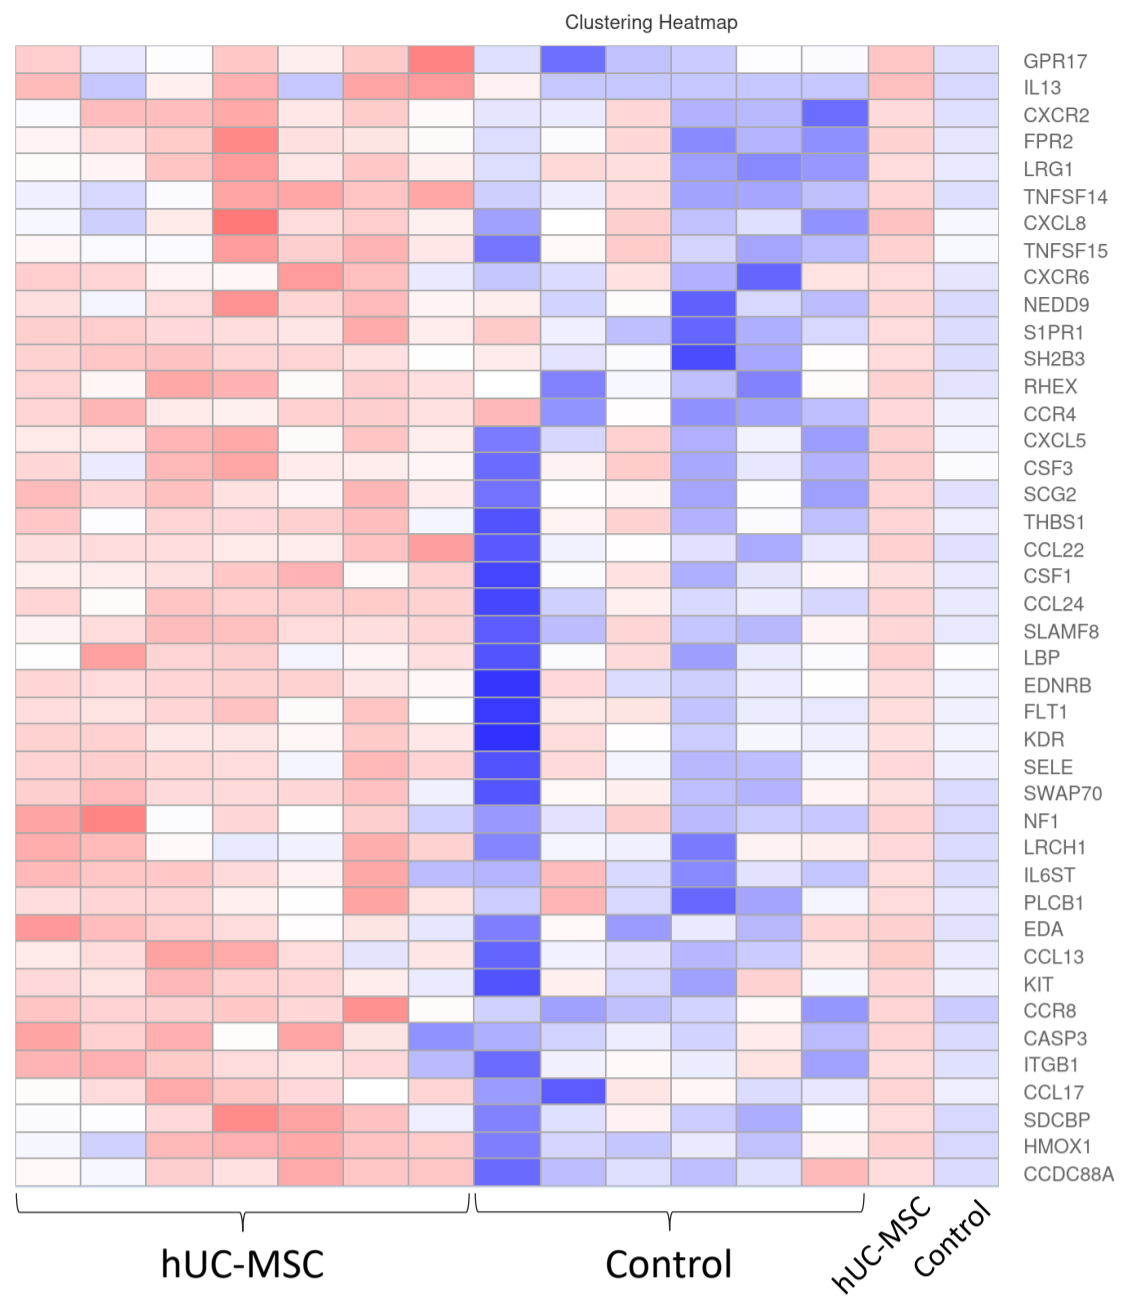

**Immunoglobulin-associated genes**

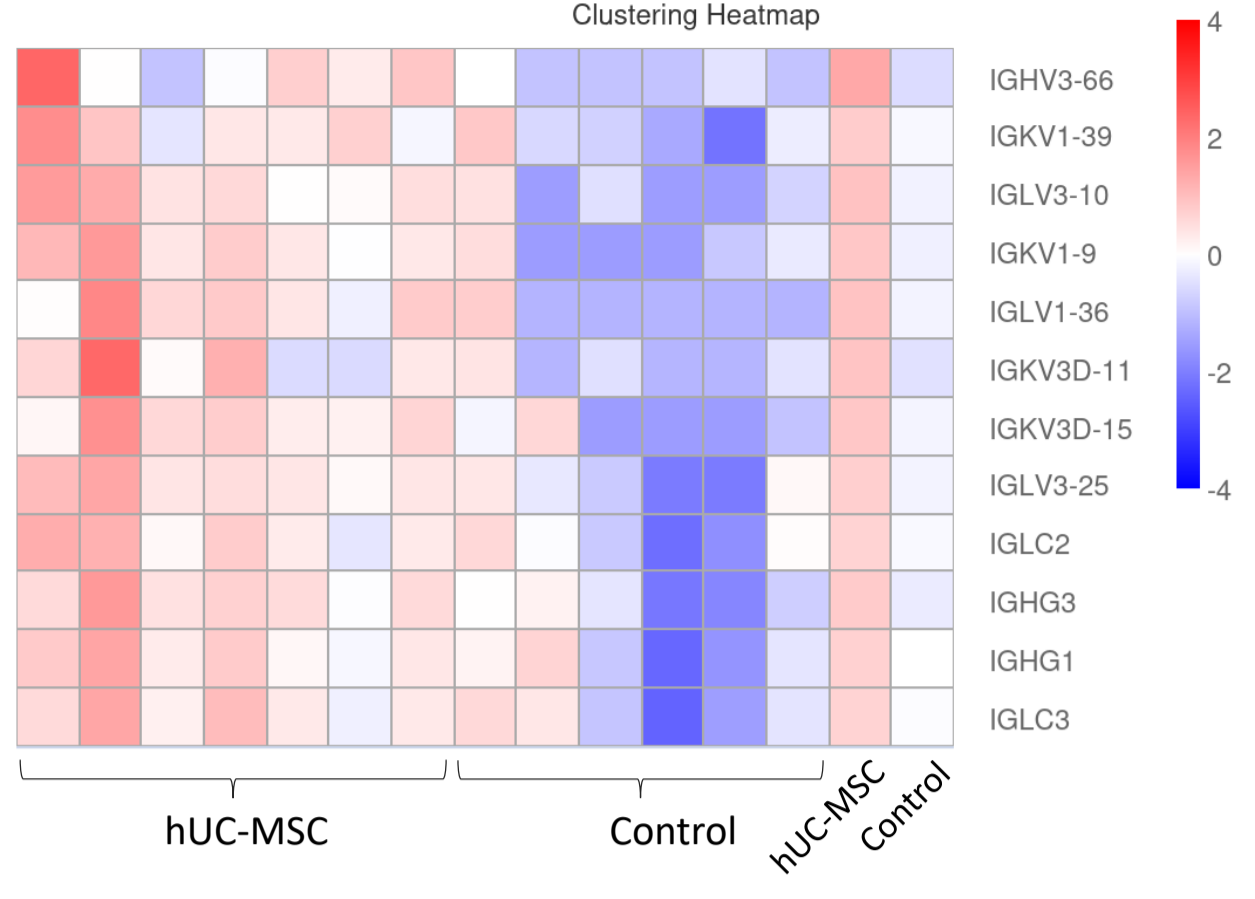

**B**

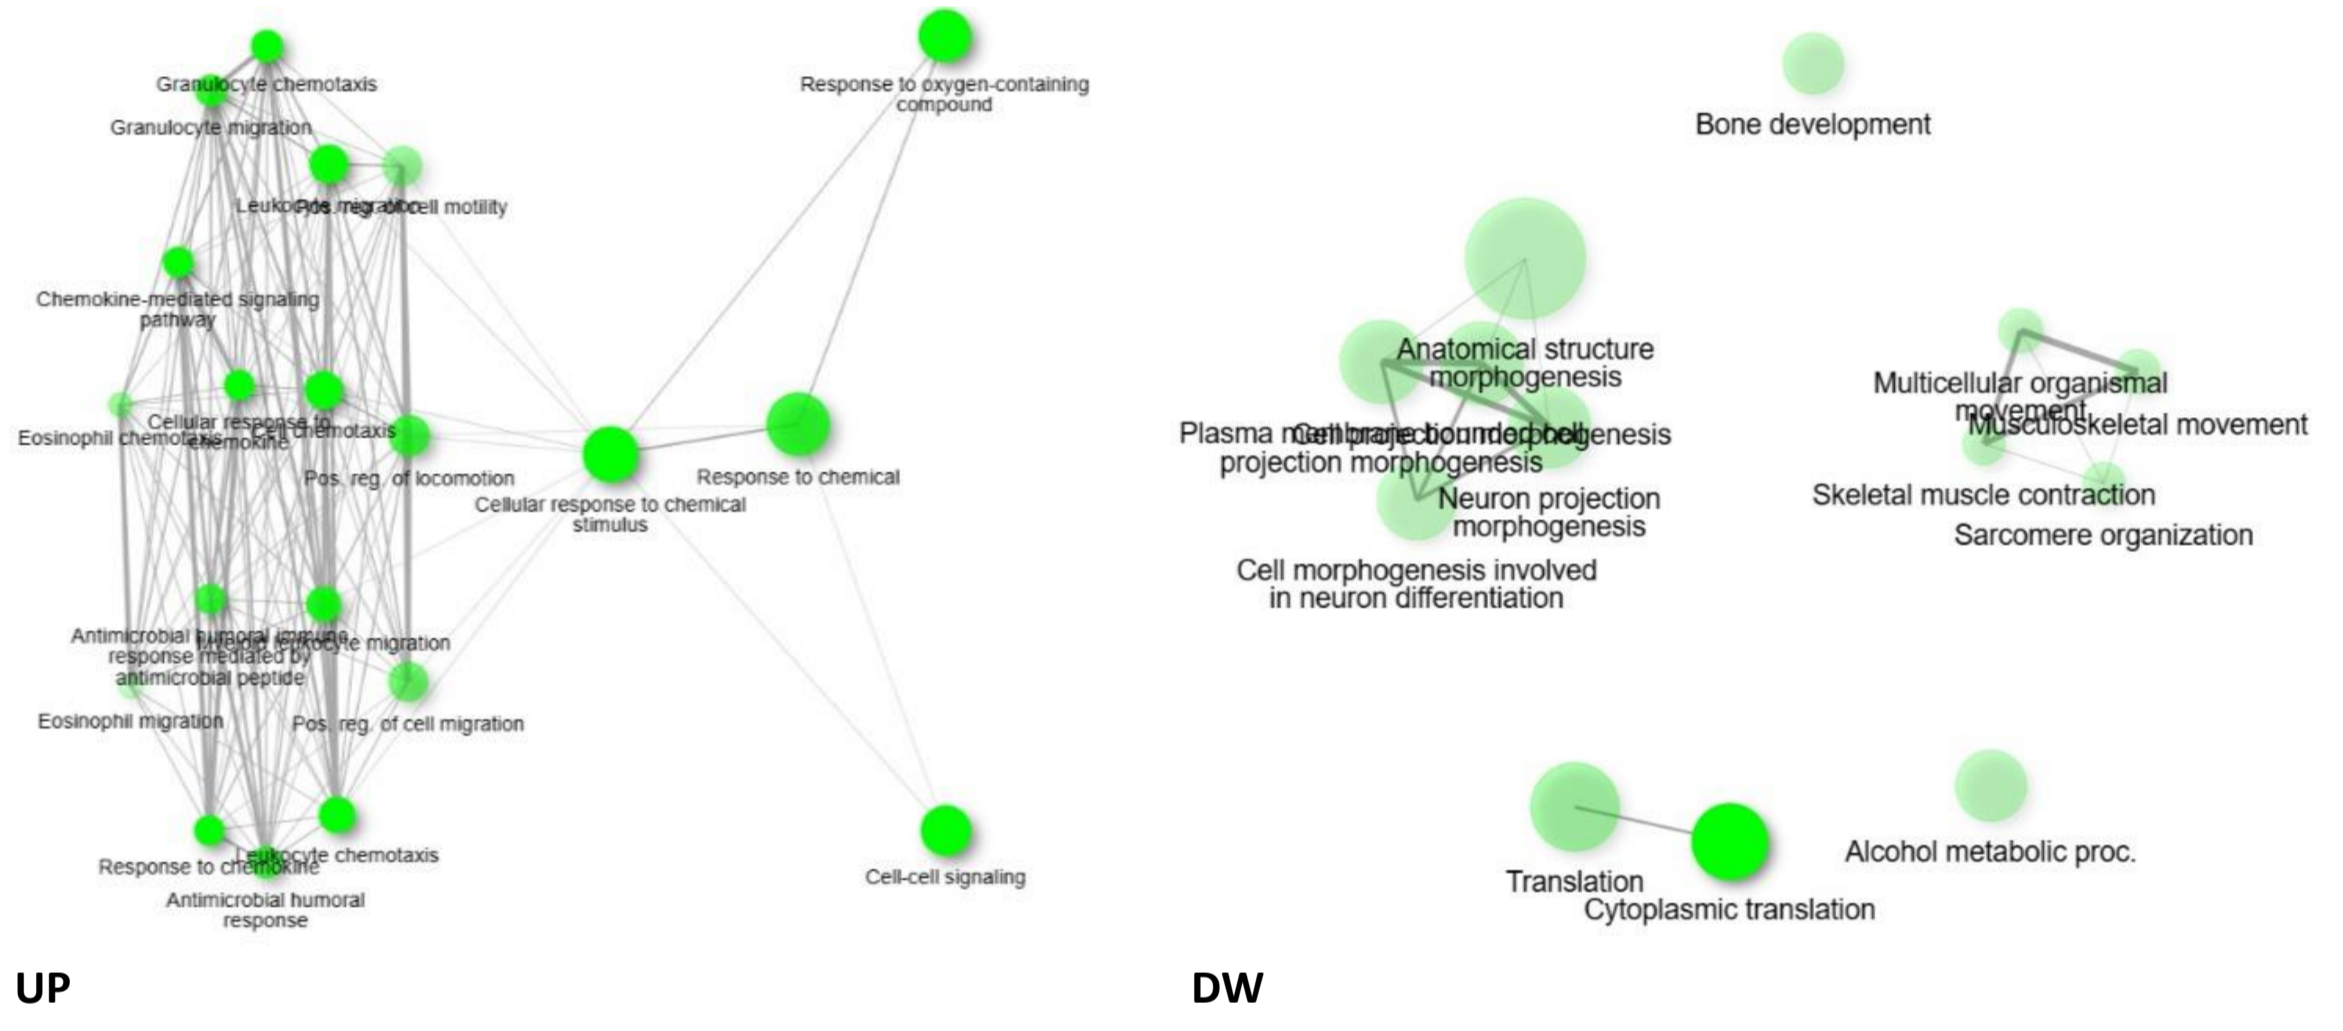

**C**

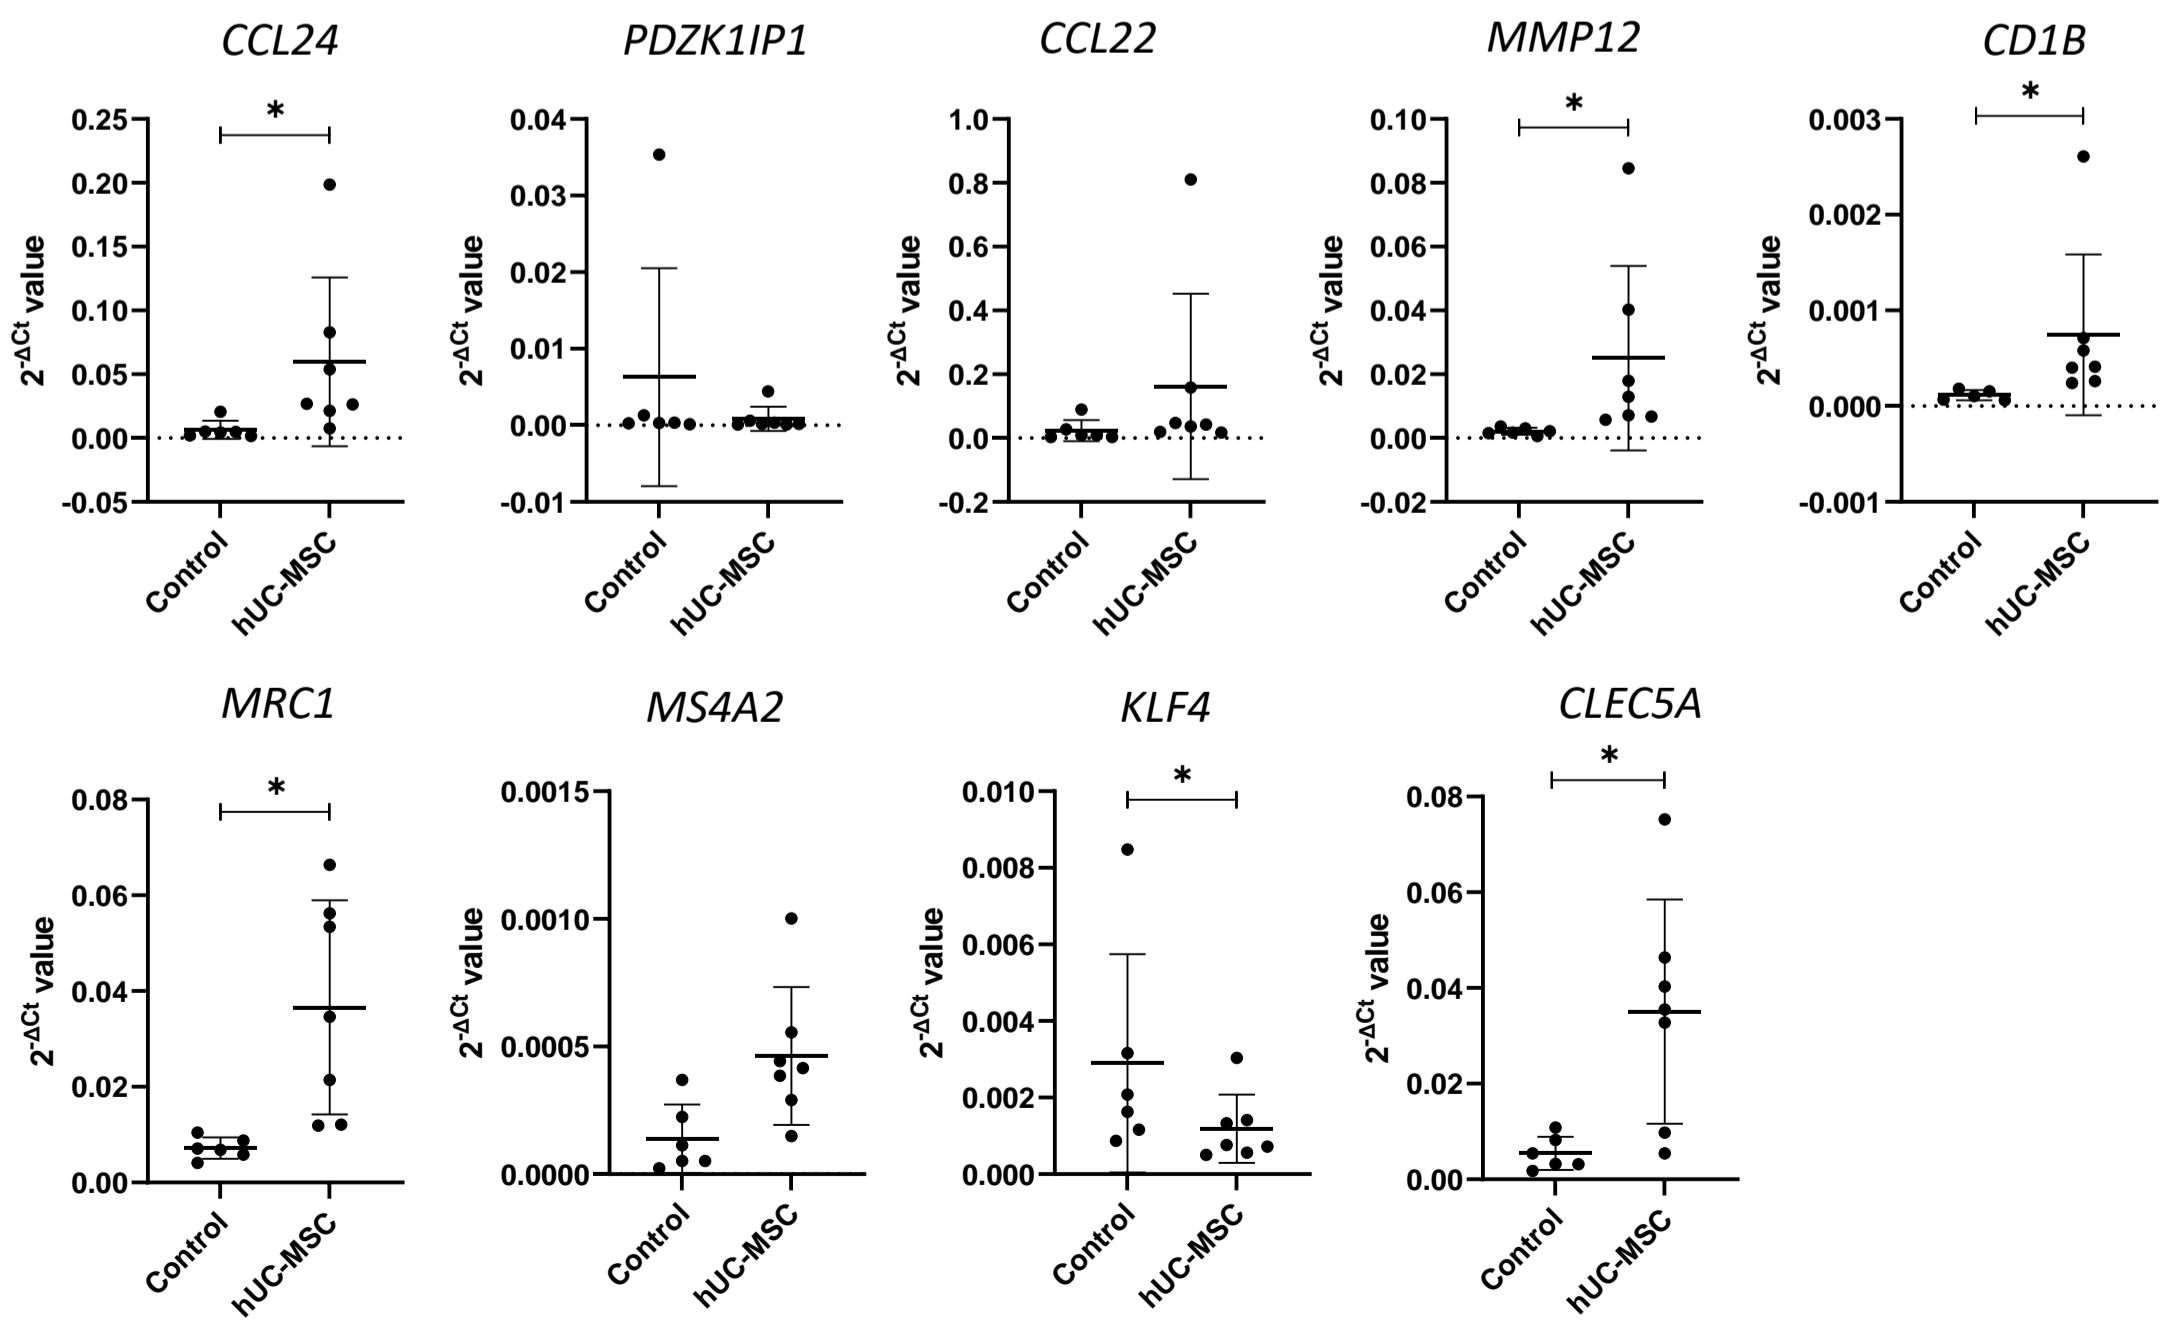

Supplement: Supplementary file 7 [file e3fc0a9045ca8116b77211c6.pdf]
